# Supplementary material for: Lamin A upregulation reorganizes the genome during rod photoreceptor degeneration
Source: Research Square preprint supplement (doi:10.21203/rs.3.rs-2518916/v1), 2023-02-08
Supplement: Supplementary file 2 [file a2ea2eeb61c79790e4a9d263.xlsx]

## Sheet: greatExportAll Annotated genes
# GREAT version 4.0.4	Species assembly: mm10	Association rule: Basal+extension: 5000 bp upstream, 1000 bp downstream, 0 bp max extension, curated regulatory domains included
#
# Ontology	ID	Desc	BinomRank	BinomP	BinomBonfP	BinomFdrQ	RegionFoldEnrich	ExpRegions	ObsRegions	GenomeFrac	SetCov	HyperRank	HyperP	HyperBonfP	HyperFdrQ	GeneFoldEnrich	ExpGenes	ObsGenes	TotalGenes	GeneSetCov	TermCov	Regions	Genes
Ensembl Genes	15220	Pcolce	1	1.7701e-06	0.0378712	0.0378712	135.715	0.0221051	3	2.26626e-06	0.000307566	1	0.0573031	1	1	17.4511	0.0573031	1	1	0.000815661	1	region_1308,region_660,region_980	Pcolce
Ensembl Genes	19731	Icam1	1	1.7701e-06	0.0378712	0.0378712	135.715	0.0221051	3	2.26626e-06	0.000307566	1	0.0573031	1	1	17.4511	0.0573031	1	1	0.000815661	1	region_1314,region_1614,region_373	Icam1
Ensembl Genes	9251	Nfatc1	1	1.7701e-06	0.0378712	0.0378712	135.715	0.0221051	3	2.26626e-06	0.000307566	1	0.0573031	1	1	17.4511	0.0573031	1	1	0.000815661	1	region_210,region_313,region_6309	Nfatc1
Ensembl Genes	15297	Amz1	1	1.7701e-06	0.0378712	0.0378712	135.715	0.0221051	3	2.26626e-06	0.000307566	1	0.0573031	1	1	17.4511	0.0573031	1	1	0.000815661	1	region_8099,region_8923,region_9016	Amz1
Ensembl Genes	10919	Prr5l	5	0.000240722	1	1	90.477	0.0221051	2	2.26626e-06	0.000205044	1	0.0573031	1	1	17.4511	0.0573031	1	1	0.000815661	1	region_1022,region_973	Prr5l
Ensembl Genes	10898	Trp53i11	5	0.000240722	1	1	90.477	0.0221051	2	2.26626e-06	0.000205044	1	0.0573031	1	1	17.4511	0.0573031	1	1	0.000815661	1	region_3324,region_5338	Trp53i11
Ensembl Genes	10892	Mapk8ip1	5	0.000240722	1	1	90.477	0.0221051	2	2.26626e-06	0.000205044	1	0.0573031	1	1	17.4511	0.0573031	1	1	0.000815661	1	region_3778,region_5972	Mapk8ip1
Ensembl Genes	10177	Card9	5	0.000240722	1	1	90.477	0.0221051	2	2.26626e-06	0.000205044	1	0.0573031	1	1	17.4511	0.0573031	1	1	0.000815661	1	region_3736,region_4316	Card9
Ensembl Genes	11640	Ocstamp	5	0.000240722	1	1	90.477	0.0221051	2	2.26626e-06	0.000205044	1	0.0573031	1	1	17.4511	0.0573031	1	1	0.000815661	1	region_4382,region_8770	Ocstamp
Ensembl Genes	11679	Tshz2	5	0.000240722	1	1	90.477	0.0221051	2	2.26626e-06	0.000205044	1	0.0573031	1	1	17.4511	0.0573031	1	1	0.000815661	1	region_1414,region_6908	Tshz2
Ensembl Genes	113	Neurl3	5	0.000240722	1	1	90.477	0.0221051	2	2.26626e-06	0.000205044	1	0.0573031	1	1	17.4511	0.0573031	1	1	0.000815661	1	region_3412,region_7233	Neurl3
Ensembl Genes	1138	Hlx	5	0.000240722	1	1	90.477	0.0221051	2	2.26626e-06	0.000205044	1	0.0573031	1	1	17.4511	0.0573031	1	1	0.000815661	1	region_5269,region_6100	Hlx
Ensembl Genes	15473	Met	5	0.000240722	1	1	90.477	0.0221051	2	2.26626e-06	0.000205044	1	0.0573031	1	1	17.4511	0.0573031	1	1	0.000815661	1	region_6519,region_8532	Met
Ensembl Genes	10923	Fjx1	5	0.000240722	1	1	90.477	0.0221051	2	2.26626e-06	0.000205044	1	0.0573031	1	1	17.4511	0.0573031	1	1	0.000815661	1	region_3652,region_7868	Fjx1
Ensembl Genes	11434	Tspyl3	5	0.000240722	1	1	90.477	0.0221051	2	2.26626e-06	0.000205044	1	0.0573031	1	1	17.4511	0.0573031	1	1	0.000815661	1	region_4747,region_5031	Tspyl3
Ensembl Genes	11767	Ppp1r3d	5	0.000240722	1	1	90.477	0.0221051	2	2.26626e-06	0.000205044	1	0.0573031	1	1	17.4511	0.0573031	1	1	0.000815661	1	region_5342,region_6959	Ppp1r3d
Ensembl Genes	11514	Dlgap4	5	0.000240722	1	1	90.477	0.0221051	2	2.26626e-06	0.000205044	1	0.0573031	1	1	17.4511	0.0573031	1	1	0.000815661	1	region_3178,region_4932	Dlgap4
Ensembl Genes	10509	Gad1	5	0.000240722	1	1	90.477	0.0221051	2	2.26626e-06	0.000205044	1	0.0573031	1	1	17.4511	0.0573031	1	1	0.000815661	1	region_2993,region_402	Gad1
Ensembl Genes	11801	Eef1a2	5	0.000240722	1	1	90.477	0.0221051	2	2.26626e-06	0.000205044	1	0.0573031	1	1	17.4511	0.0573031	1	1	0.000815661	1	region_7237,region_7609	Eef1a2
Ensembl Genes	12524	Mov10	5	0.000240722	1	1	90.477	0.0221051	2	2.26626e-06	0.000205044	1	0.0573031	1	1	17.4511	0.0573031	1	1	0.000815661	1	region_3395,region_4995	Mov10
Ensembl Genes	13341	Nfia	5	0.000240722	1	1	90.477	0.0221051	2	2.26626e-06	0.000205044	1	0.0573031	1	1	17.4511	0.0573031	1	1	0.000815661	1	region_2823,region_3640	Nfia
Ensembl Genes	13725	Hcrtr1	5	0.000240722	1	1	90.477	0.0221051	2	2.26626e-06	0.000205044	1	0.0573031	1	1	17.4511	0.0573031	1	1	0.000815661	1	region_133,region_6089	Hcrtr1
Ensembl Genes	12429	BC107364	5	0.000240722	1	1	90.477	0.0221051	2	2.26626e-06	0.000205044	1	0.0573031	1	1	17.4511	0.0573031	1	1	0.000815661	1	region_1542,region_1846	BC107364
Ensembl Genes	12133	Tlr2	5	0.000240722	1	1	90.477	0.0221051	2	2.26626e-06	0.000205044	1	0.0573031	1	1	17.4511	0.0573031	1	1	0.000815661	1	region_1216,region_721	Tlr2
Ensembl Genes	13340	E130114P18Rik	5	0.000240722	1	1	90.477	0.0221051	2	2.26626e-06	0.000205044	1	0.0573031	1	1	17.4511	0.0573031	1	1	0.000815661	1	region_2823,region_3640	E130114P18Rik
Ensembl Genes	12724	Slc39a8	5	0.000240722	1	1	90.477	0.0221051	2	2.26626e-06	0.000205044	1	0.0573031	1	1	17.4511	0.0573031	1	1	0.000815661	1	region_2739,region_3712	Slc39a8
Ensembl Genes	12723	Nfkb1	5	0.000240722	1	1	90.477	0.0221051	2	2.26626e-06	0.000205044	1	0.0573031	1	1	17.4511	0.0573031	1	1	0.000815661	1	region_1374,region_375	Nfkb1
Ensembl Genes	1466	Lims1	5	0.000240722	1	1	90.477	0.0221051	2	2.26626e-06	0.000205044	1	0.0573031	1	1	17.4511	0.0573031	1	1	0.000815661	1	region_2217,region_3870	Lims1
Ensembl Genes	14881	Mn1	5	0.000240722	1	1	90.477	0.0221051	2	2.26626e-06	0.000205044	1	0.0573031	1	1	17.4511	0.0573031	1	1	0.000815661	1	region_5005,region_5495	Mn1
Ensembl Genes	13901	Gm21969	5	0.000240722	1	1	90.477	0.0221051	2	2.26626e-06	0.000205044	1	0.0573031	1	1	17.4511	0.0573031	1	1	0.000815661	1	region_3150,region_5195	Gm21969
Ensembl Genes	14050	Pik3cd	5	0.000240722	1	1	90.477	0.0221051	2	2.26626e-06	0.000205044	1	0.0573031	1	1	17.4511	0.0573031	1	1	0.000815661	1	region_1512,region_5240	Pik3cd
Ensembl Genes	11902	Tnik	5	0.000240722	1	1	90.477	0.0221051	2	2.26626e-06	0.000205044	1	0.0573031	1	1	17.4511	0.0573031	1	1	0.000815661	1	region_456,region_958	Tnik
Ensembl Genes	13855	C1qc	5	0.000240722	1	1	90.477	0.0221051	2	2.26626e-06	0.000205044	1	0.0573031	1	1	17.4511	0.0573031	1	1	0.000815661	1	region_3084,region_9107	C1qc
Ensembl Genes	1410	Nr2e1	5	0.000240722	1	1	90.477	0.0221051	2	2.26626e-06	0.000205044	1	0.0573031	1	1	17.4511	0.0573031	1	1	0.000815661	1	region_293,region_329	Nr2e1
Ensembl Genes	15228	Tsc22d4	5	0.000240722	1	1	90.477	0.0221051	2	2.26626e-06	0.000205044	1	0.0573031	1	1	17.4511	0.0573031	1	1	0.000815661	1	region_2366,region_2542	Tsc22d4
Ensembl Genes	14351	Slc30a3	5	0.000240722	1	1	90.477	0.0221051	2	2.26626e-06	0.000205044	1	0.0573031	1	1	17.4511	0.0573031	1	1	0.000815661	1	region_4367,region_5771	Slc30a3
Ensembl Genes	15554	Plxna4	5	0.000240722	1	1	90.477	0.0221051	2	2.26626e-06	0.000205044	1	0.0573031	1	1	17.4511	0.0573031	1	1	0.000815661	1	region_1209,region_1607	Plxna4
Ensembl Genes	3316	Gpr179	5	0.000240722	1	1	90.477	0.0221051	2	2.26626e-06	0.000205044	1	0.0573031	1	1	17.4511	0.0573031	1	1	0.000815661	1	region_6936,region_7638	Gpr179
Ensembl Genes	15758	Creb5	5	0.000240722	1	1	90.477	0.0221051	2	2.26626e-06	0.000205044	1	0.0573031	1	1	17.4511	0.0573031	1	1	0.000815661	1	region_166,region_653	Creb5
Ensembl Genes	15769	Nod1	5	0.000240722	1	1	90.477	0.0221051	2	2.26626e-06	0.000205044	1	0.0573031	1	1	17.4511	0.0573031	1	1	0.000815661	1	region_655,region_9034	Nod1
Ensembl Genes	16522	Klhl42	5	0.000240722	1	1	90.477	0.0221051	2	2.26626e-06	0.000205044	1	0.0573031	1	1	17.4511	0.0573031	1	1	0.000815661	1	region_727,region_924	Klhl42
Ensembl Genes	15706	AI854703	5	0.000240722	1	1	90.477	0.0221051	2	2.26626e-06	0.000205044	1	0.0573031	1	1	17.4511	0.0573031	1	1	0.000815661	1	region_5049,region_6142	AI854703
Ensembl Genes	15826	Snca	5	0.000240722	1	1	90.477	0.0221051	2	2.26626e-06	0.000205044	1	0.0573031	1	1	17.4511	0.0573031	1	1	0.000815661	1	region_5430,region_7171	Snca
Ensembl Genes	1645	Trpm2	5	0.000240722	1	1	90.477	0.0221051	2	2.26626e-06	0.000205044	1	0.0573031	1	1	17.4511	0.0573031	1	1	0.000815661	1	region_1279,region_1306	Trpm2
Ensembl Genes	16521	Mansc4	5	0.000240722	1	1	90.477	0.0221051	2	2.26626e-06	0.000205044	1	0.0573031	1	1	17.4511	0.0573031	1	1	0.000815661	1	region_727,region_924	Mansc4
Ensembl Genes	15953	Emx1	5	0.000240722	1	1	90.477	0.0221051	2	2.26626e-06	0.000205044	1	0.0573031	1	1	17.4511	0.0573031	1	1	0.000815661	1	region_5191,region_6048	Emx1
Ensembl Genes	17519	Htatip2	5	0.000240722	1	1	90.477	0.0221051	2	2.26626e-06	0.000205044	1	0.0573031	1	1	17.4511	0.0573031	1	1	0.000815661	1	region_6232,region_9679	Htatip2
Ensembl Genes	18606	Tnfsf13b	5	0.000240722	1	1	90.477	0.0221051	2	2.26626e-06	0.000205044	1	0.0573031	1	1	17.4511	0.0573031	1	1	0.000815661	1	region_1285,region_2090	Tnfsf13b
Ensembl Genes	17543	Gm38393	5	0.000240722	1	1	90.477	0.0221051	2	2.26626e-06	0.000205044	1	0.0573031	1	1	17.4511	0.0573031	1	1	0.000815661	1	region_3224,region_5755	Gm38393
Ensembl Genes	17545	Snurf	5	0.000240722	1	1	90.477	0.0221051	2	2.26626e-06	0.000205044	1	0.0573031	1	1	17.4511	0.0573031	1	1	0.000815661	1	region_3224,region_5755	Snurf
Ensembl Genes	17770	Map6	5	0.000240722	1	1	90.477	0.0221051	2	2.26626e-06	0.000205044	1	0.0573031	1	1	17.4511	0.0573031	1	1	0.000815661	1	region_1299,region_1651	Map6
Ensembl Genes	18387	Ebf3	5	0.000240722	1	1	90.477	0.0221051	2	2.26626e-06	0.000205044	1	0.0573031	1	1	17.4511	0.0573031	1	1	0.000815661	1	region_4386,region_8907	Ebf3
Ensembl Genes	18573	Mcemp1	5	0.000240722	1	1	90.477	0.0221051	2	2.26626e-06	0.000205044	1	0.0573031	1	1	17.4511	0.0573031	1	1	0.000815661	1	region_1604,region_5087	Mcemp1
Ensembl Genes	1876	Gas2l3	5	0.000240722	1	1	90.477	0.0221051	2	2.26626e-06	0.000205044	1	0.0573031	1	1	17.4511	0.0573031	1	1	0.000815661	1	region_1105,region_550	Gas2l3
Ensembl Genes	18811	Rbpms	5	0.000240722	1	1	90.477	0.0221051	2	2.26626e-06	0.000205044	1	0.0573031	1	1	17.4511	0.0573031	1	1	0.000815661	1	region_7986,region_8493	Rbpms
Ensembl Genes	16430	Dusp16	5	0.000240722	1	1	90.477	0.0221051	2	2.26626e-06	0.000205044	1	0.0573031	1	1	17.4511	0.0573031	1	1	0.000815661	1	region_1464,region_6898	Dusp16
Ensembl Genes	19009	Pde4c	5	0.000240722	1	1	90.477	0.0221051	2	2.26626e-06	0.000205044	1	0.0573031	1	1	17.4511	0.0573031	1	1	0.000815661	1	region_1195,region_775	Pde4c
Ensembl Genes	20685	Ccrl2	5	0.000240722	1	1	90.477	0.0221051	2	2.26626e-06	0.000205044	1	0.0573031	1	1	17.4511	0.0573031	1	1	0.000815661	1	region_1030,region_677	Ccrl2
Ensembl Genes	336	Rufy4	5	0.000240722	1	1	90.477	0.0221051	2	2.26626e-06	0.000205044	1	0.0573031	1	1	17.4511	0.0573031	1	1	0.000815661	1	region_2319,region_3713	Rufy4
Ensembl Genes	3454	Cnp	5	0.000240722	1	1	90.477	0.0221051	2	2.26626e-06	0.000205044	1	0.0573031	1	1	17.4511	0.0573031	1	1	0.000815661	1	region_138,region_2743	Cnp
Ensembl Genes	20421	Bcl2a1a	5	0.000240722	1	1	90.477	0.0221051	2	2.26626e-06	0.000205044	1	0.0573031	1	1	17.4511	0.0573031	1	1	0.000815661	1	region_2808,region_7299	Bcl2a1a
Ensembl Genes	20373	Mb21d1	5	0.000240722	1	1	90.477	0.0221051	2	2.26626e-06	0.000205044	1	0.0573031	1	1	17.4511	0.0573031	1	1	0.000815661	1	region_3508,region_5615	Mb21d1
Ensembl Genes	335	Tns1	5	0.000240722	1	1	90.477	0.0221051	2	2.26626e-06	0.000205044	1	0.0573031	1	1	17.4511	0.0573031	1	1	0.000815661	1	region_2319,region_3713	Tns1
Ensembl Genes	2131	Erbb3	5	0.000240722	1	1	90.477	0.0221051	2	2.26626e-06	0.000205044	1	0.0573031	1	1	17.4511	0.0573031	1	1	0.000815661	1	region_443,region_477	Erbb3
Ensembl Genes	21110	Elf4	5	0.000240722	1	1	90.477	0.0221051	2	2.26626e-06	0.000205044	1	0.0573031	1	1	17.4511	0.0573031	1	1	0.000815661	1	region_5564,region_6219	Elf4
Ensembl Genes	4609	Hist1h4n	5	0.000240722	1	1	90.477	0.0221051	2	2.26626e-06	0.000205044	1	0.0573031	1	1	17.4511	0.0573031	1	1	0.000815661	1	region_11,region_959	Hist1h4n
Ensembl Genes	4611	Hist1h2br	5	0.000240722	1	1	90.477	0.0221051	2	2.26626e-06	0.000205044	1	0.0573031	1	1	17.4511	0.0573031	1	1	0.000815661	1	region_11,region_959	Hist1h2br
Ensembl Genes	3665	Cd300c2	5	0.000240722	1	1	90.477	0.0221051	2	2.26626e-06	0.000205044	1	0.0573031	1	1	17.4511	0.0573031	1	1	0.000815661	1	region_7906,region_9323	Cd300c2
Ensembl Genes	3714	Trim47	5	0.000240722	1	1	90.477	0.0221051	2	2.26626e-06	0.000205044	1	0.0573031	1	1	17.4511	0.0573031	1	1	0.000815661	1	region_1734,region_2460	Trim47
Ensembl Genes	19150	Cacna1a	5	0.000240722	1	1	90.477	0.0221051	2	2.26626e-06	0.000205044	1	0.0573031	1	1	17.4511	0.0573031	1	1	0.000815661	1	region_3327,region_4418	Cacna1a
Ensembl Genes	3553	Fmnl1	5	0.000240722	1	1	90.477	0.0221051	2	2.26626e-06	0.000205044	1	0.0573031	1	1	17.4511	0.0573031	1	1	0.000815661	1	region_4260,region_9557	Fmnl1
Ensembl Genes	4009	Nova1	5	0.000240722	1	1	90.477	0.0221051	2	2.26626e-06	0.000205044	1	0.0573031	1	1	17.4511	0.0573031	1	1	0.000815661	1	region_1291,region_645	Nova1
Ensembl Genes	52	Ly96	5	0.000240722	1	1	90.477	0.0221051	2	2.26626e-06	0.000205044	1	0.0573031	1	1	17.4511	0.0573031	1	1	0.000815661	1	region_4086,region_4169	Ly96
Ensembl Genes	4325	9030617O03Rik	5	0.000240722	1	1	90.477	0.0221051	2	2.26626e-06	0.000205044	1	0.0573031	1	1	17.4511	0.0573031	1	1	0.000815661	1	region_7146,region_7158	9030617O03Rik
Ensembl Genes	13076	Ccdc180	5	0.000240722	1	1	90.477	0.0221051	2	2.26626e-06	0.000205044	1	0.0573031	1	1	17.4511	0.0573031	1	1	0.000815661	1	region_1422,region_1691	Ccdc180
Ensembl Genes	5304	Parp8	5	0.000240722	1	1	90.477	0.0221051	2	2.26626e-06	0.000205044	1	0.0573031	1	1	17.4511	0.0573031	1	1	0.000815661	1	region_3107,region_7332	Parp8
Ensembl Genes	5529	Duxbl1	5	0.000240722	1	1	90.477	0.0221051	2	2.26626e-06	0.000205044	1	0.0573031	1	1	17.4511	0.0573031	1	1	0.000815661	1	region_1400,region_9005	Duxbl1
Ensembl Genes	5533	Duxbl2	5	0.000240722	1	1	90.477	0.0221051	2	2.26626e-06	0.000205044	1	0.0573031	1	1	17.4511	0.0573031	1	1	0.000815661	1	region_4325,region_6050	Duxbl2
Ensembl Genes	6311	Basp1	5	0.000240722	1	1	90.477	0.0221051	2	2.26626e-06	0.000205044	1	0.0573031	1	1	17.4511	0.0573031	1	1	0.000815661	1	region_1262,region_762	Basp1
Ensembl Genes	5524	Zcchc24	5	0.000240722	1	1	90.477	0.0221051	2	2.26626e-06	0.000205044	1	0.0573031	1	1	17.4511	0.0573031	1	1	0.000815661	1	region_2318,region_3185	Zcchc24
Ensembl Genes	5537	Duxbl3	5	0.000240722	1	1	90.477	0.0221051	2	2.26626e-06	0.000205044	1	0.0573031	1	1	17.4511	0.0573031	1	1	0.000815661	1	region_5509,region_5639	Duxbl3
Ensembl Genes	6140	Ccdc122	5	0.000240722	1	1	90.477	0.0221051	2	2.26626e-06	0.000205044	1	0.0573031	1	1	17.4511	0.0573031	1	1	0.000815661	1	region_5583,region_8056	Ccdc122
Ensembl Genes	6167	Gm10110	5	0.000240722	1	1	90.477	0.0221051	2	2.26626e-06	0.000205044	1	0.0573031	1	1	17.4511	0.0573031	1	1	0.000815661	1	region_1018,region_849	Gm10110
Ensembl Genes	6015	Gata4	5	0.000240722	1	1	90.477	0.0221051	2	2.26626e-06	0.000205044	1	0.0573031	1	1	17.4511	0.0573031	1	1	0.000815661	1	region_3469,region_4677	Gata4
Ensembl Genes	6454	Myc	5	0.000240722	1	1	90.477	0.0221051	2	2.26626e-06	0.000205044	1	0.0573031	1	1	17.4511	0.0573031	1	1	0.000815661	1	region_4936,region_6190	Myc
Ensembl Genes	8011	Arhgdig	5	0.000240722	1	1	90.477	0.0221051	2	2.26626e-06	0.000205044	1	0.0573031	1	1	17.4511	0.0573031	1	1	0.000815661	1	region_1577,region_2651	Arhgdig
Ensembl Genes	6839	Slc38a1	5	0.000240722	1	1	90.477	0.0221051	2	2.26626e-06	0.000205044	1	0.0573031	1	1	17.4511	0.0573031	1	1	0.000815661	1	region_2628,region_798	Slc38a1
Ensembl Genes	6937	Galnt6	5	0.000240722	1	1	90.477	0.0221051	2	2.26626e-06	0.000205044	1	0.0573031	1	1	17.4511	0.0573031	1	1	0.000815661	1	region_5891,region_6398	Galnt6
Ensembl Genes	7181	Slc25a1	5	0.000240722	1	1	90.477	0.0221051	2	2.26626e-06	0.000205044	1	0.0573031	1	1	17.4511	0.0573031	1	1	0.000815661	1	region_4887,region_6799	Slc25a1
Ensembl Genes	7357	Dtx3l	5	0.000240722	1	1	90.477	0.0221051	2	2.26626e-06	0.000205044	1	0.0573031	1	1	17.4511	0.0573031	1	1	0.000815661	1	region_330,region_414	Dtx3l
Ensembl Genes	8010	Pdia2	5	0.000240722	1	1	90.477	0.0221051	2	2.26626e-06	0.000205044	1	0.0573031	1	1	17.4511	0.0573031	1	1	0.000815661	1	region_1577,region_2651	Pdia2
Ensembl Genes	8012	Rgs11	5	0.000240722	1	1	90.477	0.0221051	2	2.26626e-06	0.000205044	1	0.0573031	1	1	17.4511	0.0573031	1	1	0.000815661	1	region_1577,region_2651	Rgs11
Ensembl Genes	8030	Itpr3	5	0.000240722	1	1	90.477	0.0221051	2	2.26626e-06	0.000205044	1	0.0573031	1	1	17.4511	0.0573031	1	1	0.000815661	1	region_5392,region_6864	Itpr3
Ensembl Genes	8148	Myo1f	5	0.000240722	1	1	90.477	0.0221051	2	2.26626e-06	0.000205044	1	0.0573031	1	1	17.4511	0.0573031	1	1	0.000815661	1	region_1586,region_7467	Myo1f
Ensembl Genes	8186	H2-Ab1	5	0.000240722	1	1	90.477	0.0221051	2	2.26626e-06	0.000205044	1	0.0573031	1	1	17.4511	0.0573031	1	1	0.000815661	1	region_1766,region_4548	H2-Ab1
Ensembl Genes	8195	Notch4	5	0.000240722	1	1	90.477	0.0221051	2	2.26626e-06	0.000205044	1	0.0573031	1	1	17.4511	0.0573031	1	1	0.000815661	1	region_451,region_6893	Notch4
Ensembl Genes	8258	H2-Q6	5	0.000240722	1	1	90.477	0.0221051	2	2.26626e-06	0.000205044	1	0.0573031	1	1	17.4511	0.0573031	1	1	0.000815661	1	region_1110,region_3189	H2-Q6
Ensembl Genes	8263	Cchcr1	5	0.000240722	1	1	90.477	0.0221051	2	2.26626e-06	0.000205044	1	0.0573031	1	1	17.4511	0.0573031	1	1	0.000815661	1	region_6454,region_8868	Cchcr1
Ensembl Genes	8586	Tnfsf9	5	0.000240722	1	1	90.477	0.0221051	2	2.26626e-06	0.000205044	1	0.0573031	1	1	17.4511	0.0573031	1	1	0.000815661	1	region_5067,region_5590	Tnfsf9
Ensembl Genes	8631	Tgif1	5	0.000240722	1	1	90.477	0.0221051	2	2.26626e-06	0.000205044	1	0.0573031	1	1	17.4511	0.0573031	1	1	0.000815661	1	region_192,region_528	Tgif1
Ensembl Genes	5326	Gm21370	5	0.000240722	1	1	90.477	0.0221051	2	2.26626e-06	0.000205044	1	0.0573031	1	1	17.4511	0.0573031	1	1	0.000815661	1	region_1496,region_3313	Gm21370
Ensembl Genes	8718	Six3	5	0.000240722	1	1	90.477	0.0221051	2	2.26626e-06	0.000205044	1	0.0573031	1	1	17.4511	0.0573031	1	1	0.000815661	1	region_773,region_9461	Six3
Ensembl Genes	9289	Unc93b1	5	0.000240722	1	1	90.477	0.0221051	2	2.26626e-06	0.000205044	1	0.0573031	1	1	17.4511	0.0573031	1	1	0.000815661	1	region_2116,region_3936	Unc93b1
Ensembl Genes	9802	Blnk	5	0.000240722	1	1	90.477	0.0221051	2	2.26626e-06	0.000205044	1	0.0573031	1	1	17.4511	0.0573031	1	1	0.000815661	1	region_5468,region_8086	Blnk
Ensembl Genes	21767	Asmt	105	0.0036774	1	0.749314	271.431	0.00368418	1	3.77709e-07	0.000102522	1	0.0573031	1	1	17.4511	0.0573031	1	1	0.000815661	1	region_174	Asmt
Ensembl Genes	20805	Ppp2r3d	106	0.0195969	1	1	50.527	0.0197914	1	2.02906e-06	0.000102522	1	0.0573031	1	1	17.4511	0.0573031	1	1	0.000815661	1	region_4001	Ppp2r3d
Ensembl Genes	100	Dst	107	0.0218626	1	1	45.2385	0.0221051	1	2.26626e-06	0.000102522	1	0.0573031	1	1	17.4511	0.0573031	1	1	0.000815661	1	region_7888	Dst
Ensembl Genes	10043	Itga8	107	0.0218626	1	1	45.2385	0.0221051	1	2.26626e-06	0.000102522	1	0.0573031	1	1	17.4511	0.0573031	1	1	0.000815661	1	region_2858	Itga8
Ensembl Genes	10186	Agpat2	107	0.0218626	1	1	45.2385	0.0221051	1	2.26626e-06	0.000102522	1	0.0573031	1	1	17.4511	0.0573031	1	1	0.000815661	1	region_2884	Agpat2
Ensembl Genes	10085	Apbb1ip	107	0.0218626	1	1	45.2385	0.0221051	1	2.26626e-06	0.000102522	1	0.0573031	1	1	17.4511	0.0573031	1	1	0.000815661	1	region_3193	Apbb1ip
Ensembl Genes	10093	Spopl	107	0.0218626	1	1	45.2385	0.0221051	1	2.26626e-06	0.000102522	1	0.0573031	1	1	17.4511	0.0573031	1	1	0.000815661	1	region_651	Spopl
Ensembl Genes	10131	Grin1	107	0.0218626	1	1	45.2385	0.0221051	1	2.26626e-06	0.000102522	1	0.0573031	1	1	17.4511	0.0573031	1	1	0.000815661	1	region_3137	Grin1
Ensembl Genes	10134	Uap1l1	107	0.0218626	1	1	45.2385	0.0221051	1	2.26626e-06	0.000102522	1	0.0573031	1	1	17.4511	0.0573031	1	1	0.000815661	1	region_3670	Uap1l1
Ensembl Genes	10138	Fut7	107	0.0218626	1	1	45.2385	0.0221051	1	2.26626e-06	0.000102522	1	0.0573031	1	1	17.4511	0.0573031	1	1	0.000815661	1	region_4504	Fut7
Ensembl Genes	10187	Fam69b	107	0.0218626	1	1	45.2385	0.0221051	1	2.26626e-06	0.000102522	1	0.0573031	1	1	17.4511	0.0573031	1	1	0.000815661	1	region_5680	Fam69b
Ensembl Genes	10591	Gm13693	107	0.0218626	1	1	45.2385	0.0221051	1	2.26626e-06	0.000102522	1	0.0573031	1	1	17.4511	0.0573031	1	1	0.000815661	1	region_429	Gm13693
Ensembl Genes	10204	Dbh	107	0.0218626	1	1	45.2385	0.0221051	1	2.26626e-06	0.000102522	1	0.0573031	1	1	17.4511	0.0573031	1	1	0.000815661	1	region_5560	Dbh
Ensembl Genes	1021	Slamf8	107	0.0218626	1	1	45.2385	0.0221051	1	2.26626e-06	0.000102522	1	0.0573031	1	1	17.4511	0.0573031	1	1	0.000815661	1	region_4641	Slamf8
Ensembl Genes	10287	Lamc3	107	0.0218626	1	1	45.2385	0.0221051	1	2.26626e-06	0.000102522	1	0.0573031	1	1	17.4511	0.0573031	1	1	0.000815661	1	region_9091	Lamc3
Ensembl Genes	10198	Adamts13	107	0.0218626	1	1	45.2385	0.0221051	1	2.26626e-06	0.000102522	1	0.0573031	1	1	17.4511	0.0573031	1	1	0.000815661	1	region_7165	Adamts13
Ensembl Genes	10217	Gbgt1	107	0.0218626	1	1	45.2385	0.0221051	1	2.26626e-06	0.000102522	1	0.0573031	1	1	17.4511	0.0573031	1	1	0.000815661	1	region_8094	Gbgt1
Ensembl Genes	10266	Cstad	107	0.0218626	1	1	45.2385	0.0221051	1	2.26626e-06	0.000102522	1	0.0573031	1	1	17.4511	0.0573031	1	1	0.000815661	1	region_1505	Cstad
Ensembl Genes	10282	Prdm12	107	0.0218626	1	1	45.2385	0.0221051	1	2.26626e-06	0.000102522	1	0.0573031	1	1	17.4511	0.0573031	1	1	0.000815661	1	region_4840	Prdm12
Ensembl Genes	10228	Barhl1	107	0.0218626	1	1	45.2385	0.0221051	1	2.26626e-06	0.000102522	1	0.0573031	1	1	17.4511	0.0573031	1	1	0.000815661	1	region_8683	Barhl1
Ensembl Genes	10352	Dab2ip	107	0.0218626	1	1	45.2385	0.0221051	1	2.26626e-06	0.000102522	1	0.0573031	1	1	17.4511	0.0573031	1	1	0.000815661	1	region_8778	Dab2ip
Ensembl Genes	10455	Cd302	107	0.0218626	1	1	45.2385	0.0221051	1	2.26626e-06	0.000102522	1	0.0573031	1	1	17.4511	0.0573031	1	1	0.000815661	1	region_1852	Cd302
Ensembl Genes	10393	Gpr21	107	0.0218626	1	1	45.2385	0.0221051	1	2.26626e-06	0.000102522	1	0.0573031	1	1	17.4511	0.0573031	1	1	0.000815661	1	region_6840	Gpr21
Ensembl Genes	10422	Rnd3	107	0.0218626	1	1	45.2385	0.0221051	1	2.26626e-06	0.000102522	1	0.0573031	1	1	17.4511	0.0573031	1	1	0.000815661	1	region_3607	Rnd3
Ensembl Genes	10436	Galnt13	107	0.0218626	1	1	45.2385	0.0221051	1	2.26626e-06	0.000102522	1	0.0573031	1	1	17.4511	0.0573031	1	1	0.000815661	1	region_145	Galnt13
Ensembl Genes	10438	Nr4a2	107	0.0218626	1	1	45.2385	0.0221051	1	2.26626e-06	0.000102522	1	0.0573031	1	1	17.4511	0.0573031	1	1	0.000815661	1	region_8187	Nr4a2
Ensembl Genes	1045	Ifi211	107	0.0218626	1	1	45.2385	0.0221051	1	2.26626e-06	0.000102522	1	0.0573031	1	1	17.4511	0.0573031	1	1	0.000815661	1	region_2920	Ifi211
Ensembl Genes	10460	Tank	107	0.0218626	1	1	45.2385	0.0221051	1	2.26626e-06	0.000102522	1	0.0573031	1	1	17.4511	0.0573031	1	1	0.000815661	1	region_7220	Tank
Ensembl Genes	10508	Erich2	107	0.0218626	1	1	45.2385	0.0221051	1	2.26626e-06	0.000102522	1	0.0573031	1	1	17.4511	0.0573031	1	1	0.000815661	1	region_285	Erich2
Ensembl Genes	10521	Dlx2	107	0.0218626	1	1	45.2385	0.0221051	1	2.26626e-06	0.000102522	1	0.0573031	1	1	17.4511	0.0573031	1	1	0.000815661	1	region_1870	Dlx2
Ensembl Genes	10525	Map3k20	107	0.0218626	1	1	45.2385	0.0221051	1	2.26626e-06	0.000102522	1	0.0573031	1	1	17.4511	0.0573031	1	1	0.000815661	1	region_2592	Map3k20
Ensembl Genes	10573	Cerkl	107	0.0218626	1	1	45.2385	0.0221051	1	2.26626e-06	0.000102522	1	0.0573031	1	1	17.4511	0.0573031	1	1	0.000815661	1	region_4132	Cerkl
Ensembl Genes	10593	Gm13696	107	0.0218626	1	1	45.2385	0.0221051	1	2.26626e-06	0.000102522	1	0.0573031	1	1	17.4511	0.0573031	1	1	0.000815661	1	region_984	Gm13696
Ensembl Genes	10594	Gm13694	107	0.0218626	1	1	45.2385	0.0221051	1	2.26626e-06	0.000102522	1	0.0573031	1	1	17.4511	0.0573031	1	1	0.000815661	1	region_2244	Gm13694
Ensembl Genes	10566	Ttn	107	0.0218626	1	1	45.2385	0.0221051	1	2.26626e-06	0.000102522	1	0.0573031	1	1	17.4511	0.0573031	1	1	0.000815661	1	region_3554	Ttn
Ensembl Genes	10545	Hoxd9	107	0.0218626	1	1	45.2385	0.0221051	1	2.26626e-06	0.000102522	1	0.0573031	1	1	17.4511	0.0573031	1	1	0.000815661	1	region_6208	Hoxd9
Ensembl Genes	10592	Gm13695	107	0.0218626	1	1	45.2385	0.0221051	1	2.26626e-06	0.000102522	1	0.0573031	1	1	17.4511	0.0573031	1	1	0.000815661	1	region_3592	Gm13695
Ensembl Genes	10590	Gm13698	107	0.0218626	1	1	45.2385	0.0221051	1	2.26626e-06	0.000102522	1	0.0573031	1	1	17.4511	0.0573031	1	1	0.000815661	1	region_1503	Gm13698
Ensembl Genes	10584	Zfp804a	107	0.0218626	1	1	45.2385	0.0221051	1	2.26626e-06	0.000102522	1	0.0573031	1	1	17.4511	0.0573031	1	1	0.000815661	1	region_7803	Zfp804a
Ensembl Genes	1065	Grem2	107	0.0218626	1	1	45.2385	0.0221051	1	2.26626e-06	0.000102522	1	0.0573031	1	1	17.4511	0.0573031	1	1	0.000815661	1	region_938	Grem2
Ensembl Genes	1066	Rgs7	107	0.0218626	1	1	45.2385	0.0221051	1	2.26626e-06	0.000102522	1	0.0573031	1	1	17.4511	0.0573031	1	1	0.000815661	1	region_391	Rgs7
Ensembl Genes	10595	Gm13697	107	0.0218626	1	1	45.2385	0.0221051	1	2.26626e-06	0.000102522	1	0.0573031	1	1	17.4511	0.0573031	1	1	0.000815661	1	region_1671	Gm13697
Ensembl Genes	10596	Gm13691	107	0.0218626	1	1	45.2385	0.0221051	1	2.26626e-06	0.000102522	1	0.0573031	1	1	17.4511	0.0573031	1	1	0.000815661	1	region_1459	Gm13691
Ensembl Genes	10607	Ypel4	107	0.0218626	1	1	45.2385	0.0221051	1	2.26626e-06	0.000102522	1	0.0573031	1	1	17.4511	0.0573031	1	1	0.000815661	1	region_2868	Ypel4
Ensembl Genes	10609	Serping1	107	0.0218626	1	1	45.2385	0.0221051	1	2.26626e-06	0.000102522	1	0.0573031	1	1	17.4511	0.0573031	1	1	0.000815661	1	region_5088	Serping1
Ensembl Genes	18611	Rab20	107	0.0218626	1	1	45.2385	0.0221051	1	2.26626e-06	0.000102522	1	0.0573031	1	1	17.4511	0.0573031	1	1	0.000815661	1	region_3049	Rab20
Ensembl Genes	10854	Ptprj	107	0.0218626	1	1	45.2385	0.0221051	1	2.26626e-06	0.000102522	1	0.0573031	1	1	17.4511	0.0573031	1	1	0.000815661	1	region_4545	Ptprj
Ensembl Genes	10610	Ube2l6	107	0.0218626	1	1	45.2385	0.0221051	1	2.26626e-06	0.000102522	1	0.0573031	1	1	17.4511	0.0573031	1	1	0.000815661	1	region_5134	Ube2l6
Ensembl Genes	10866	Spi1	107	0.0218626	1	1	45.2385	0.0221051	1	2.26626e-06	0.000102522	1	0.0573031	1	1	17.4511	0.0573031	1	1	0.000815661	1	region_6734	Spi1
Ensembl Genes	1087	Kif26b	107	0.0218626	1	1	45.2385	0.0221051	1	2.26626e-06	0.000102522	1	0.0573031	1	1	17.4511	0.0573031	1	1	0.000815661	1	region_1397	Kif26b
Ensembl Genes	10887	Creb3l1	107	0.0218626	1	1	45.2385	0.0221051	1	2.26626e-06	0.000102522	1	0.0573031	1	1	17.4511	0.0573031	1	1	0.000815661	1	region_3817	Creb3l1
Ensembl Genes	10905	Accsl	107	0.0218626	1	1	45.2385	0.0221051	1	2.26626e-06	0.000102522	1	0.0573031	1	1	17.4511	0.0573031	1	1	0.000815661	1	region_1936	Accsl
Ensembl Genes	10943	D430041D05Rik	107	0.0218626	1	1	45.2385	0.0221051	1	2.26626e-06	0.000102522	1	0.0573031	1	1	17.4511	0.0573031	1	1	0.000815661	1	region_9738	D430041D05Rik
Ensembl Genes	10950	Prrg4	107	0.0218626	1	1	45.2385	0.0221051	1	2.26626e-06	0.000102522	1	0.0573031	1	1	17.4511	0.0573031	1	1	0.000815661	1	region_6439	Prrg4
Ensembl Genes	10957	Pax6	107	0.0218626	1	1	45.2385	0.0221051	1	2.26626e-06	0.000102522	1	0.0573031	1	1	17.4511	0.0573031	1	1	0.000815661	1	region_7255	Pax6
Ensembl Genes	11223	Il1b	107	0.0218626	1	1	45.2385	0.0221051	1	2.26626e-06	0.000102522	1	0.0573031	1	1	17.4511	0.0573031	1	1	0.000815661	1	region_2687	Il1b
Ensembl Genes	1098	Itpkb	107	0.0218626	1	1	45.2385	0.0221051	1	2.26626e-06	0.000102522	1	0.0573031	1	1	17.4511	0.0573031	1	1	0.000815661	1	region_2537	Itpkb
Ensembl Genes	11054	Plcb2	107	0.0218626	1	1	45.2385	0.0221051	1	2.26626e-06	0.000102522	1	0.0573031	1	1	17.4511	0.0573031	1	1	0.000815661	1	region_3503	Plcb2
Ensembl Genes	11056	A430105I19Rik	107	0.0218626	1	1	45.2385	0.0221051	1	2.26626e-06	0.000102522	1	0.0573031	1	1	17.4511	0.0573031	1	1	0.000815661	1	region_4880	A430105I19Rik
Ensembl Genes	11072	Ppp1r14d	107	0.0218626	1	1	45.2385	0.0221051	1	2.26626e-06	0.000102522	1	0.0573031	1	1	17.4511	0.0573031	1	1	0.000815661	1	region_5964	Ppp1r14d
Ensembl Genes	11073	Spint1	107	0.0218626	1	1	45.2385	0.0221051	1	2.26626e-06	0.000102522	1	0.0573031	1	1	17.4511	0.0573031	1	1	0.000815661	1	region_5964	Spint1
Ensembl Genes	11077	Chac1	107	0.0218626	1	1	45.2385	0.0221051	1	2.26626e-06	0.000102522	1	0.0573031	1	1	17.4511	0.0573031	1	1	0.000815661	1	region_8247	Chac1
Ensembl Genes	11088	Tyro3	107	0.0218626	1	1	45.2385	0.0221051	1	2.26626e-06	0.000102522	1	0.0573031	1	1	17.4511	0.0573031	1	1	0.000815661	1	region_3393	Tyro3
Ensembl Genes	11153	AA467197	107	0.0218626	1	1	45.2385	0.0221051	1	2.26626e-06	0.000102522	1	0.0573031	1	1	17.4511	0.0573031	1	1	0.000815661	1	region_5054	AA467197
Ensembl Genes	11186	Itpripl1	107	0.0218626	1	1	45.2385	0.0221051	1	2.26626e-06	0.000102522	1	0.0573031	1	1	17.4511	0.0573031	1	1	0.000815661	1	region_5633	Itpripl1
Ensembl Genes	11192	Dusp2	107	0.0218626	1	1	45.2385	0.0221051	1	2.26626e-06	0.000102522	1	0.0573031	1	1	17.4511	0.0573031	1	1	0.000815661	1	region_87	Dusp2
Ensembl Genes	11210	Mertk	107	0.0218626	1	1	45.2385	0.0221051	1	2.26626e-06	0.000102522	1	0.0573031	1	1	17.4511	0.0573031	1	1	0.000815661	1	region_279	Mertk
Ensembl Genes	11222	Il1a	107	0.0218626	1	1	45.2385	0.0221051	1	2.26626e-06	0.000102522	1	0.0573031	1	1	17.4511	0.0573031	1	1	0.000815661	1	region_2824	Il1a
Ensembl Genes	11226	Pdyn	107	0.0218626	1	1	45.2385	0.0221051	1	2.26626e-06	0.000102522	1	0.0573031	1	1	17.4511	0.0573031	1	1	0.000815661	1	region_9061	Pdyn
Ensembl Genes	11432	Hck	107	0.0218626	1	1	45.2385	0.0221051	1	2.26626e-06	0.000102522	1	0.0573031	1	1	17.4511	0.0573031	1	1	0.000815661	1	region_9370	Hck
Ensembl Genes	11267	Adra1d	107	0.0218626	1	1	45.2385	0.0221051	1	2.26626e-06	0.000102522	1	0.0573031	1	1	17.4511	0.0573031	1	1	0.000815661	1	region_7693	Adra1d
Ensembl Genes	11272	Rassf2	107	0.0218626	1	1	45.2385	0.0221051	1	2.26626e-06	0.000102522	1	0.0573031	1	1	17.4511	0.0573031	1	1	0.000815661	1	region_2916	Rassf2
Ensembl Genes	1128	Susd4	107	0.0218626	1	1	45.2385	0.0221051	1	2.26626e-06	0.000102522	1	0.0573031	1	1	17.4511	0.0573031	1	1	0.000815661	1	region_1922	Susd4
Ensembl Genes	11290	Plcb4	107	0.0218626	1	1	45.2385	0.0221051	1	2.26626e-06	0.000102522	1	0.0573031	1	1	17.4511	0.0573031	1	1	0.000815661	1	region_4767	Plcb4
Ensembl Genes	11312	Bfsp1	107	0.0218626	1	1	45.2385	0.0221051	1	2.26626e-06	0.000102522	1	0.0573031	1	1	17.4511	0.0573031	1	1	0.000815661	1	region_4102	Bfsp1
Ensembl Genes	12036	P2ry13	107	0.0218626	1	1	45.2385	0.0221051	1	2.26626e-06	0.000102522	1	0.0573031	1	1	17.4511	0.0573031	1	1	0.000815661	1	region_7414	P2ry13
Ensembl Genes	11369	Zfp442	107	0.0218626	1	1	45.2385	0.0221051	1	2.26626e-06	0.000102522	1	0.0573031	1	1	17.4511	0.0573031	1	1	0.000815661	1	region_353	Zfp442
Ensembl Genes	11397	Tcf15	107	0.0218626	1	1	45.2385	0.0221051	1	2.26626e-06	0.000102522	1	0.0573031	1	1	17.4511	0.0573031	1	1	0.000815661	1	region_6982	Tcf15
Ensembl Genes	11411	Defb29	107	0.0218626	1	1	45.2385	0.0221051	1	2.26626e-06	0.000102522	1	0.0573031	1	1	17.4511	0.0573031	1	1	0.000815661	1	region_2780	Defb29
Ensembl Genes	1142	Mark1	107	0.0218626	1	1	45.2385	0.0221051	1	2.26626e-06	0.000102522	1	0.0573031	1	1	17.4511	0.0573031	1	1	0.000815661	1	region_2437	Mark1
Ensembl Genes	11455	Bpifa5	107	0.0218626	1	1	45.2385	0.0221051	1	2.26626e-06	0.000102522	1	0.0573031	1	1	17.4511	0.0573031	1	1	0.000815661	1	region_9068	Bpifa5
Ensembl Genes	11427	Dusp15	107	0.0218626	1	1	45.2385	0.0221051	1	2.26626e-06	0.000102522	1	0.0573031	1	1	17.4511	0.0573031	1	1	0.000815661	1	region_5102	Dusp15
Ensembl Genes	11428	Ttll9	107	0.0218626	1	1	45.2385	0.0221051	1	2.26626e-06	0.000102522	1	0.0573031	1	1	17.4511	0.0573031	1	1	0.000815661	1	region_713	Ttll9
Ensembl Genes	11464	1700003F12Rik	107	0.0218626	1	1	45.2385	0.0221051	1	2.26626e-06	0.000102522	1	0.0573031	1	1	17.4511	0.0573031	1	1	0.000815661	1	region_1272	1700003F12Rik
Ensembl Genes	11516	Tgif2	107	0.0218626	1	1	45.2385	0.0221051	1	2.26626e-06	0.000102522	1	0.0573031	1	1	17.4511	0.0573031	1	1	0.000815661	1	region_5720	Tgif2
Ensembl Genes	11465	Actl10	107	0.0218626	1	1	45.2385	0.0221051	1	2.26626e-06	0.000102522	1	0.0573031	1	1	17.4511	0.0573031	1	1	0.000815661	1	region_1272	Actl10
Ensembl Genes	1149	Tgfb2	107	0.0218626	1	1	45.2385	0.0221051	1	2.26626e-06	0.000102522	1	0.0573031	1	1	17.4511	0.0573031	1	1	0.000815661	1	region_5939	Tgfb2
Ensembl Genes	11577	Kcnk15	107	0.0218626	1	1	45.2385	0.0221051	1	2.26626e-06	0.000102522	1	0.0573031	1	1	17.4511	0.0573031	1	1	0.000815661	1	region_4277	Kcnk15
Ensembl Genes	1161	Prox1	107	0.0218626	1	1	45.2385	0.0221051	1	2.26626e-06	0.000102522	1	0.0573031	1	1	17.4511	0.0573031	1	1	0.000815661	1	region_8337	Prox1
Ensembl Genes	11647	Sulf2	107	0.0218626	1	1	45.2385	0.0221051	1	2.26626e-06	0.000102522	1	0.0573031	1	1	17.4511	0.0573031	1	1	0.000815661	1	region_1147	Sulf2
Ensembl Genes	11667	Ripor3	107	0.0218626	1	1	45.2385	0.0221051	1	2.26626e-06	0.000102522	1	0.0573031	1	1	17.4511	0.0573031	1	1	0.000815661	1	region_4828	Ripor3
Ensembl Genes	11674	Nfatc2	107	0.0218626	1	1	45.2385	0.0221051	1	2.26626e-06	0.000102522	1	0.0573031	1	1	17.4511	0.0573031	1	1	0.000815661	1	region_8543	Nfatc2
Ensembl Genes	11702	Zbp1	107	0.0218626	1	1	45.2385	0.0221051	1	2.26626e-06	0.000102522	1	0.0573031	1	1	17.4511	0.0573031	1	1	0.000815661	1	region_4322	Zbp1
Ensembl Genes	11726	Gm4631	107	0.0218626	1	1	45.2385	0.0221051	1	2.26626e-06	0.000102522	1	0.0573031	1	1	17.4511	0.0573031	1	1	0.000815661	1	region_3194	Gm4631
Ensembl Genes	11727	Zfp968	107	0.0218626	1	1	45.2385	0.0221051	1	2.26626e-06	0.000102522	1	0.0573031	1	1	17.4511	0.0573031	1	1	0.000815661	1	region_4052	Zfp968
Ensembl Genes	11728	Gm4724	107	0.0218626	1	1	45.2385	0.0221051	1	2.26626e-06	0.000102522	1	0.0573031	1	1	17.4511	0.0573031	1	1	0.000815661	1	region_503	Gm4724
Ensembl Genes	11729	Zfp965	107	0.0218626	1	1	45.2385	0.0221051	1	2.26626e-06	0.000102522	1	0.0573031	1	1	17.4511	0.0573031	1	1	0.000815661	1	region_841	Zfp965
Ensembl Genes	11730	Gm11007	107	0.0218626	1	1	45.2385	0.0221051	1	2.26626e-06	0.000102522	1	0.0573031	1	1	17.4511	0.0573031	1	1	0.000815661	1	region_204	Gm11007
Ensembl Genes	11731	Zfp969	107	0.0218626	1	1	45.2385	0.0221051	1	2.26626e-06	0.000102522	1	0.0573031	1	1	17.4511	0.0573031	1	1	0.000815661	1	region_2659	Zfp969
Ensembl Genes	11735	Zfp966	107	0.0218626	1	1	45.2385	0.0221051	1	2.26626e-06	0.000102522	1	0.0573031	1	1	17.4511	0.0573031	1	1	0.000815661	1	region_1964	Zfp966
Ensembl Genes	11732	Gm2007	107	0.0218626	1	1	45.2385	0.0221051	1	2.26626e-06	0.000102522	1	0.0573031	1	1	17.4511	0.0573031	1	1	0.000815661	1	region_1026	Gm2007
Ensembl Genes	11733	Gm14288	107	0.0218626	1	1	45.2385	0.0221051	1	2.26626e-06	0.000102522	1	0.0573031	1	1	17.4511	0.0573031	1	1	0.000815661	1	region_3198	Gm14288
Ensembl Genes	11736	Gm2026	107	0.0218626	1	1	45.2385	0.0221051	1	2.26626e-06	0.000102522	1	0.0573031	1	1	17.4511	0.0573031	1	1	0.000815661	1	region_2020	Gm2026
Ensembl Genes	11743	Gm14308	107	0.0218626	1	1	45.2385	0.0221051	1	2.26626e-06	0.000102522	1	0.0573031	1	1	17.4511	0.0573031	1	1	0.000815661	1	region_434	Gm14308
Ensembl Genes	11741	Gm14434	107	0.0218626	1	1	45.2385	0.0221051	1	2.26626e-06	0.000102522	1	0.0573031	1	1	17.4511	0.0573031	1	1	0.000815661	1	region_2196	Gm14434
Ensembl Genes	11742	Zfp967	107	0.0218626	1	1	45.2385	0.0221051	1	2.26626e-06	0.000102522	1	0.0573031	1	1	17.4511	0.0573031	1	1	0.000815661	1	region_4416	Zfp967
Ensembl Genes	11744	Zfp973	107	0.0218626	1	1	45.2385	0.0221051	1	2.26626e-06	0.000102522	1	0.0573031	1	1	17.4511	0.0573031	1	1	0.000815661	1	region_1514	Zfp973
Ensembl Genes	11746	Gm14295	107	0.0218626	1	1	45.2385	0.0221051	1	2.26626e-06	0.000102522	1	0.0573031	1	1	17.4511	0.0573031	1	1	0.000815661	1	region_3017	Gm14295
Ensembl Genes	11754	Gm14418	107	0.0218626	1	1	45.2385	0.0221051	1	2.26626e-06	0.000102522	1	0.0573031	1	1	17.4511	0.0573031	1	1	0.000815661	1	region_3715	Gm14418
Ensembl Genes	11755	Zfp970	107	0.0218626	1	1	45.2385	0.0221051	1	2.26626e-06	0.000102522	1	0.0573031	1	1	17.4511	0.0573031	1	1	0.000815661	1	region_409	Zfp970
Ensembl Genes	11808	Stmn3	107	0.0218626	1	1	45.2385	0.0221051	1	2.26626e-06	0.000102522	1	0.0573031	1	1	17.4511	0.0573031	1	1	0.000815661	1	region_1198	Stmn3
Ensembl Genes	11747	Gm14408	107	0.0218626	1	1	45.2385	0.0221051	1	2.26626e-06	0.000102522	1	0.0573031	1	1	17.4511	0.0573031	1	1	0.000815661	1	region_8235	Gm14408
Ensembl Genes	11768	Fam217b	107	0.0218626	1	1	45.2385	0.0221051	1	2.26626e-06	0.000102522	1	0.0573031	1	1	17.4511	0.0573031	1	1	0.000815661	1	region_5342	Fam217b
Ensembl Genes	11793	Bhlhe23	107	0.0218626	1	1	45.2385	0.0221051	1	2.26626e-06	0.000102522	1	0.0573031	1	1	17.4511	0.0573031	1	1	0.000815661	1	region_9565	Bhlhe23
Ensembl Genes	11806	Helz2	107	0.0218626	1	1	45.2385	0.0221051	1	2.26626e-06	0.000102522	1	0.0573031	1	1	17.4511	0.0573031	1	1	0.000815661	1	region_7067	Helz2
Ensembl Genes	11783	Gata5	107	0.0218626	1	1	45.2385	0.0221051	1	2.26626e-06	0.000102522	1	0.0573031	1	1	17.4511	0.0573031	1	1	0.000815661	1	region_8724	Gata5
Ensembl Genes	11832	Zfhx4	107	0.0218626	1	1	45.2385	0.0221051	1	2.26626e-06	0.000102522	1	0.0573031	1	1	17.4511	0.0573031	1	1	0.000815661	1	region_7894	Zfhx4
Ensembl Genes	11978	Pcdh10	107	0.0218626	1	1	45.2385	0.0221051	1	2.26626e-06	0.000102522	1	0.0573031	1	1	17.4511	0.0573031	1	1	0.000815661	1	region_7987	Pcdh10
Ensembl Genes	11836	Pkia	107	0.0218626	1	1	45.2385	0.0221051	1	2.26626e-06	0.000102522	1	0.0573031	1	1	17.4511	0.0573031	1	1	0.000815661	1	region_611	Pkia
Ensembl Genes	11846	Fabp5	107	0.0218626	1	1	45.2385	0.0221051	1	2.26626e-06	0.000102522	1	0.0573031	1	1	17.4511	0.0573031	1	1	0.000815661	1	region_5	Fabp5
Ensembl Genes	1185	Sertad4	107	0.0218626	1	1	45.2385	0.0221051	1	2.26626e-06	0.000102522	1	0.0573031	1	1	17.4511	0.0573031	1	1	0.000815661	1	region_5800	Sertad4
Ensembl Genes	11864	Car13	107	0.0218626	1	1	45.2385	0.0221051	1	2.26626e-06	0.000102522	1	0.0573031	1	1	17.4511	0.0573031	1	1	0.000815661	1	region_3795	Car13
Ensembl Genes	11965	Fat4	107	0.0218626	1	1	45.2385	0.0221051	1	2.26626e-06	0.000102522	1	0.0573031	1	1	17.4511	0.0573031	1	1	0.000815661	1	region_8987	Fat4
Ensembl Genes	12018	Tm4sf4	107	0.0218626	1	1	45.2385	0.0221051	1	2.26626e-06	0.000102522	1	0.0573031	1	1	17.4511	0.0573031	1	1	0.000815661	1	region_1293	Tm4sf4
Ensembl Genes	12032	Med12l	107	0.0218626	1	1	45.2385	0.0221051	1	2.26626e-06	0.000102522	1	0.0573031	1	1	17.4511	0.0573031	1	1	0.000815661	1	region_3346	Med12l
Ensembl Genes	12037	P2ry12	107	0.0218626	1	1	45.2385	0.0221051	1	2.26626e-06	0.000102522	1	0.0573031	1	1	17.4511	0.0573031	1	1	0.000815661	1	region_4265	P2ry12
Ensembl Genes	1275	Il20ra	107	0.0218626	1	1	45.2385	0.0221051	1	2.26626e-06	0.000102522	1	0.0573031	1	1	17.4511	0.0573031	1	1	0.000815661	1	region_2046	Il20ra
Ensembl Genes	12091	B3galnt1	107	0.0218626	1	1	45.2385	0.0221051	1	2.26626e-06	0.000102522	1	0.0573031	1	1	17.4511	0.0573031	1	1	0.000815661	1	region_8155	B3galnt1
Ensembl Genes	12105	Fstl5	107	0.0218626	1	1	45.2385	0.0221051	1	2.26626e-06	0.000102522	1	0.0573031	1	1	17.4511	0.0573031	1	1	0.000815661	1	region_4842	Fstl5
Ensembl Genes	12152	Dclk2	107	0.0218626	1	1	45.2385	0.0221051	1	2.26626e-06	0.000102522	1	0.0573031	1	1	17.4511	0.0573031	1	1	0.000815661	1	region_1932	Dclk2
Ensembl Genes	12044	Sucnr1	107	0.0218626	1	1	45.2385	0.0221051	1	2.26626e-06	0.000102522	1	0.0573031	1	1	17.4511	0.0573031	1	1	0.000815661	1	region_7327	Sucnr1
Ensembl Genes	12118	Ctso	107	0.0218626	1	1	45.2385	0.0221051	1	2.26626e-06	0.000102522	1	0.0573031	1	1	17.4511	0.0573031	1	1	0.000815661	1	region_1014	Ctso
Ensembl Genes	1214	Vip	107	0.0218626	1	1	45.2385	0.0221051	1	2.26626e-06	0.000102522	1	0.0573031	1	1	17.4511	0.0573031	1	1	0.000815661	1	region_593	Vip
Ensembl Genes	12148	Sh3d19	107	0.0218626	1	1	45.2385	0.0221051	1	2.26626e-06	0.000102522	1	0.0573031	1	1	17.4511	0.0573031	1	1	0.000815661	1	region_7690	Sh3d19
Ensembl Genes	12138	Fhdc1	107	0.0218626	1	1	45.2385	0.0221051	1	2.26626e-06	0.000102522	1	0.0573031	1	1	17.4511	0.0573031	1	1	0.000815661	1	region_6857	Fhdc1
Ensembl Genes	12153	Cd1d1	107	0.0218626	1	1	45.2385	0.0221051	1	2.26626e-06	0.000102522	1	0.0573031	1	1	17.4511	0.0573031	1	1	0.000815661	1	region_6018	Cd1d1
Ensembl Genes	12194	Lmna	107	0.0218626	1	1	45.2385	0.0221051	1	2.26626e-06	0.000102522	1	0.0573031	1	1	17.4511	0.0573031	1	1	0.000815661	1	region_1069	Lmna
Ensembl Genes	12162	Pear1	107	0.0218626	1	1	45.2385	0.0221051	1	2.26626e-06	0.000102522	1	0.0573031	1	1	17.4511	0.0573031	1	1	0.000815661	1	region_2941	Pear1
Ensembl Genes	12163	Ntrk1	107	0.0218626	1	1	45.2385	0.0221051	1	2.26626e-06	0.000102522	1	0.0573031	1	1	17.4511	0.0573031	1	1	0.000815661	1	region_1685	Ntrk1
Ensembl Genes	12164	Insrr	107	0.0218626	1	1	45.2385	0.0221051	1	2.26626e-06	0.000102522	1	0.0573031	1	1	17.4511	0.0573031	1	1	0.000815661	1	region_1685	Insrr
Ensembl Genes	12172	Nes	107	0.0218626	1	1	45.2385	0.0221051	1	2.26626e-06	0.000102522	1	0.0573031	1	1	17.4511	0.0573031	1	1	0.000815661	1	region_3159	Nes
Ensembl Genes	12189	Bglap2	107	0.0218626	1	1	45.2385	0.0221051	1	2.26626e-06	0.000102522	1	0.0573031	1	1	17.4511	0.0573031	1	1	0.000815661	1	region_9206	Bglap2
Ensembl Genes	12241	Chrnb2	107	0.0218626	1	1	45.2385	0.0221051	1	2.26626e-06	0.000102522	1	0.0573031	1	1	17.4511	0.0573031	1	1	0.000815661	1	region_1467	Chrnb2
Ensembl Genes	1232	Ust	107	0.0218626	1	1	45.2385	0.0221051	1	2.26626e-06	0.000102522	1	0.0573031	1	1	17.4511	0.0573031	1	1	0.000815661	1	region_3122	Ust
Ensembl Genes	1233	Sash1	107	0.0218626	1	1	45.2385	0.0221051	1	2.26626e-06	0.000102522	1	0.0573031	1	1	17.4511	0.0573031	1	1	0.000815661	1	region_748	Sash1
Ensembl Genes	12355	C2cd4d	107	0.0218626	1	1	45.2385	0.0221051	1	2.26626e-06	0.000102522	1	0.0573031	1	1	17.4511	0.0573031	1	1	0.000815661	1	region_4944	C2cd4d
Ensembl Genes	12362	Celf3	107	0.0218626	1	1	45.2385	0.0221051	1	2.26626e-06	0.000102522	1	0.0573031	1	1	17.4511	0.0573031	1	1	0.000815661	1	region_2433	Celf3
Ensembl Genes	12369	Psmb4	107	0.0218626	1	1	45.2385	0.0221051	1	2.26626e-06	0.000102522	1	0.0573031	1	1	17.4511	0.0573031	1	1	0.000815661	1	region_2948	Psmb4
Ensembl Genes	1244	Stx11	107	0.0218626	1	1	45.2385	0.0221051	1	2.26626e-06	0.000102522	1	0.0573031	1	1	17.4511	0.0573031	1	1	0.000815661	1	region_1391	Stx11
Ensembl Genes	12361	Riiad1	107	0.0218626	1	1	45.2385	0.0221051	1	2.26626e-06	0.000102522	1	0.0573031	1	1	17.4511	0.0573031	1	1	0.000815661	1	region_2433	Riiad1
Ensembl Genes	1237	Rab32	107	0.0218626	1	1	45.2385	0.0221051	1	2.26626e-06	0.000102522	1	0.0573031	1	1	17.4511	0.0573031	1	1	0.000815661	1	region_6425	Rab32
Ensembl Genes	12426	Hist2h3b	107	0.0218626	1	1	45.2385	0.0221051	1	2.26626e-06	0.000102522	1	0.0573031	1	1	17.4511	0.0573031	1	1	0.000815661	1	region_6	Hist2h3b
Ensembl Genes	12427	Hist2h2bb	107	0.0218626	1	1	45.2385	0.0221051	1	2.26626e-06	0.000102522	1	0.0573031	1	1	17.4511	0.0573031	1	1	0.000815661	1	region_6	Hist2h2bb
Ensembl Genes	12414	Mtmr11	107	0.0218626	1	1	45.2385	0.0221051	1	2.26626e-06	0.000102522	1	0.0573031	1	1	17.4511	0.0573031	1	1	0.000815661	1	region_770	Mtmr11
Ensembl Genes	12487	Igsf3	107	0.0218626	1	1	45.2385	0.0221051	1	2.26626e-06	0.000102522	1	0.0573031	1	1	17.4511	0.0573031	1	1	0.000815661	1	region_5962	Igsf3
Ensembl Genes	12564	Alx3	107	0.0218626	1	1	45.2385	0.0221051	1	2.26626e-06	0.000102522	1	0.0573031	1	1	17.4511	0.0573031	1	1	0.000815661	1	region_9090	Alx3
Ensembl Genes	12495	Tspan2	107	0.0218626	1	1	45.2385	0.0221051	1	2.26626e-06	0.000102522	1	0.0573031	1	1	17.4511	0.0573031	1	1	0.000815661	1	region_4740	Tspan2
Ensembl Genes	12508	Olfml3	107	0.0218626	1	1	45.2385	0.0221051	1	2.26626e-06	0.000102522	1	0.0573031	1	1	17.4511	0.0573031	1	1	0.000815661	1	region_5133	Olfml3
Ensembl Genes	12535	Adora3	107	0.0218626	1	1	45.2385	0.0221051	1	2.26626e-06	0.000102522	1	0.0573031	1	1	17.4511	0.0573031	1	1	0.000815661	1	region_457	Adora3
Ensembl Genes	1254	Hivep2	107	0.0218626	1	1	45.2385	0.0221051	1	2.26626e-06	0.000102522	1	0.0573031	1	1	17.4511	0.0573031	1	1	0.000815661	1	region_298	Hivep2
Ensembl Genes	12558	Lamtor5	107	0.0218626	1	1	45.2385	0.0221051	1	2.26626e-06	0.000102522	1	0.0573031	1	1	17.4511	0.0573031	1	1	0.000815661	1	region_51	Lamtor5
Ensembl Genes	12572	Gstm6	107	0.0218626	1	1	45.2385	0.0221051	1	2.26626e-06	0.000102522	1	0.0573031	1	1	17.4511	0.0573031	1	1	0.000815661	1	region_3399	Gstm6
Ensembl Genes	12577	Ampd2	107	0.0218626	1	1	45.2385	0.0221051	1	2.26626e-06	0.000102522	1	0.0573031	1	1	17.4511	0.0573031	1	1	0.000815661	1	region_6159	Ampd2
Ensembl Genes	12591	5330417C22Rik	107	0.0218626	1	1	45.2385	0.0221051	1	2.26626e-06	0.000102522	1	0.0573031	1	1	17.4511	0.0573031	1	1	0.000815661	1	region_182	5330417C22Rik
Ensembl Genes	12592	1700013F07Rik	107	0.0218626	1	1	45.2385	0.0221051	1	2.26626e-06	0.000102522	1	0.0573031	1	1	17.4511	0.0573031	1	1	0.000815661	1	region_182	1700013F07Rik
Ensembl Genes	12602	Gm9857	107	0.0218626	1	1	45.2385	0.0221051	1	2.26626e-06	0.000102522	1	0.0573031	1	1	17.4511	0.0573031	1	1	0.000815661	1	region_6447	Gm9857
Ensembl Genes	12603	Henmt1	107	0.0218626	1	1	45.2385	0.0221051	1	2.26626e-06	0.000102522	1	0.0573031	1	1	17.4511	0.0573031	1	1	0.000815661	1	region_6447	Henmt1
Ensembl Genes	12619	S1pr1	107	0.0218626	1	1	45.2385	0.0221051	1	2.26626e-06	0.000102522	1	0.0573031	1	1	17.4511	0.0573031	1	1	0.000815661	1	region_9256	S1pr1
Ensembl Genes	1262	Abracl	107	0.0218626	1	1	45.2385	0.0221051	1	2.26626e-06	0.000102522	1	0.0573031	1	1	17.4511	0.0573031	1	1	0.000815661	1	region_1117	Abracl
Ensembl Genes	12640	Snx7	107	0.0218626	1	1	45.2385	0.0221051	1	2.26626e-06	0.000102522	1	0.0573031	1	1	17.4511	0.0573031	1	1	0.000815661	1	region_224	Snx7
Ensembl Genes	12656	Fnbp1l	107	0.0218626	1	1	45.2385	0.0221051	1	2.26626e-06	0.000102522	1	0.0573031	1	1	17.4511	0.0573031	1	1	0.000815661	1	region_5990	Fnbp1l
Ensembl Genes	12657	Pde5a	107	0.0218626	1	1	45.2385	0.0221051	1	2.26626e-06	0.000102522	1	0.0573031	1	1	17.4511	0.0573031	1	1	0.000815661	1	region_7289	Pde5a
Ensembl Genes	12678	Neurog2	107	0.0218626	1	1	45.2385	0.0221051	1	2.26626e-06	0.000102522	1	0.0573031	1	1	17.4511	0.0573031	1	1	0.000815661	1	region_420	Neurog2
Ensembl Genes	12679	Alpk1	107	0.0218626	1	1	45.2385	0.0221051	1	2.26626e-06	0.000102522	1	0.0573031	1	1	17.4511	0.0573031	1	1	0.000815661	1	region_5472	Alpk1
Ensembl Genes	1270	Perp	107	0.0218626	1	1	45.2385	0.0221051	1	2.26626e-06	0.000102522	1	0.0573031	1	1	17.4511	0.0573031	1	1	0.000815661	1	region_7680	Perp
Ensembl Genes	12757	Gbp3	107	0.0218626	1	1	45.2385	0.0221051	1	2.26626e-06	0.000102522	1	0.0573031	1	1	17.4511	0.0573031	1	1	0.000815661	1	region_5922	Gbp3
Ensembl Genes	12708	Npnt	107	0.0218626	1	1	45.2385	0.0221051	1	2.26626e-06	0.000102522	1	0.0573031	1	1	17.4511	0.0573031	1	1	0.000815661	1	region_782	Npnt
Ensembl Genes	12734	Dapp1	107	0.0218626	1	1	45.2385	0.0221051	1	2.26626e-06	0.000102522	1	0.0573031	1	1	17.4511	0.0573031	1	1	0.000815661	1	region_4612	Dapp1
Ensembl Genes	12778	Ddah1	107	0.0218626	1	1	45.2385	0.0221051	1	2.26626e-06	0.000102522	1	0.0573031	1	1	17.4511	0.0573031	1	1	0.000815661	1	region_7447	Ddah1
Ensembl Genes	12840	Lyn	107	0.0218626	1	1	45.2385	0.0221051	1	2.26626e-06	0.000102522	1	0.0573031	1	1	17.4511	0.0573031	1	1	0.000815661	1	region_4031	Lyn
Ensembl Genes	12817	Slc44a5	107	0.0218626	1	1	45.2385	0.0221051	1	2.26626e-06	0.000102522	1	0.0573031	1	1	17.4511	0.0573031	1	1	0.000815661	1	region_894	Slc44a5
Ensembl Genes	12833	Depdc1a	107	0.0218626	1	1	45.2385	0.0221051	1	2.26626e-06	0.000102522	1	0.0573031	1	1	17.4511	0.0573031	1	1	0.000815661	1	region_9229	Depdc1a
Ensembl Genes	12859	Clvs1	107	0.0218626	1	1	45.2385	0.0221051	1	2.26626e-06	0.000102522	1	0.0573031	1	1	17.4511	0.0573031	1	1	0.000815661	1	region_1655	Clvs1
Ensembl Genes	12890	Decr1	107	0.0218626	1	1	45.2385	0.0221051	1	2.26626e-06	0.000102522	1	0.0573031	1	1	17.4511	0.0573031	1	1	0.000815661	1	region_2234	Decr1
Ensembl Genes	1294	Slc2a12	107	0.0218626	1	1	45.2385	0.0221051	1	2.26626e-06	0.000102522	1	0.0573031	1	1	17.4511	0.0573031	1	1	0.000815661	1	region_982	Slc2a12
Ensembl Genes	12983	Cntfr	107	0.0218626	1	1	45.2385	0.0221051	1	2.26626e-06	0.000102522	1	0.0573031	1	1	17.4511	0.0573031	1	1	0.000815661	1	region_1765	Cntfr
Ensembl Genes	13025	Atp8b5	107	0.0218626	1	1	45.2385	0.0221051	1	2.26626e-06	0.000102522	1	0.0573031	1	1	17.4511	0.0573031	1	1	0.000815661	1	region_5406	Atp8b5
Ensembl Genes	12933	Gabrr2	107	0.0218626	1	1	45.2385	0.0221051	1	2.26626e-06	0.000102522	1	0.0573031	1	1	17.4511	0.0573031	1	1	0.000815661	1	region_1744	Gabrr2
Ensembl Genes	12986	Arid3c	107	0.0218626	1	1	45.2385	0.0221051	1	2.26626e-06	0.000102522	1	0.0573031	1	1	17.4511	0.0573031	1	1	0.000815661	1	region_9261	Arid3c
Ensembl Genes	13010	4930578G10Rik	107	0.0218626	1	1	45.2385	0.0221051	1	2.26626e-06	0.000102522	1	0.0573031	1	1	17.4511	0.0573031	1	1	0.000815661	1	region_7343	4930578G10Rik
Ensembl Genes	13018	1700022I11Rik	107	0.0218626	1	1	45.2385	0.0221051	1	2.26626e-06	0.000102522	1	0.0573031	1	1	17.4511	0.0573031	1	1	0.000815661	1	region_6132	1700022I11Rik
Ensembl Genes	12998	Gm13305	107	0.0218626	1	1	45.2385	0.0221051	1	2.26626e-06	0.000102522	1	0.0573031	1	1	17.4511	0.0573031	1	1	0.000815661	1	region_7536	Gm13305
Ensembl Genes	13026	Rusc2	107	0.0218626	1	1	45.2385	0.0221051	1	2.26626e-06	0.000102522	1	0.0573031	1	1	17.4511	0.0573031	1	1	0.000815661	1	region_8181	Rusc2
Ensembl Genes	13112	Tmem246	107	0.0218626	1	1	45.2385	0.0221051	1	2.26626e-06	0.000102522	1	0.0573031	1	1	17.4511	0.0573031	1	1	0.000815661	1	region_4623	Tmem246
Ensembl Genes	13029	Cd72	107	0.0218626	1	1	45.2385	0.0221051	1	2.26626e-06	0.000102522	1	0.0573031	1	1	17.4511	0.0573031	1	1	0.000815661	1	region_7368	Cd72
Ensembl Genes	13060	Pax5	107	0.0218626	1	1	45.2385	0.0221051	1	2.26626e-06	0.000102522	1	0.0573031	1	1	17.4511	0.0573031	1	1	0.000815661	1	region_6294	Pax5
Ensembl Genes	13078	Tmod1	107	0.0218626	1	1	45.2385	0.0221051	1	2.26626e-06	0.000102522	1	0.0573031	1	1	17.4511	0.0573031	1	1	0.000815661	1	region_1060	Tmod1
Ensembl Genes	13082	Foxe1	107	0.0218626	1	1	45.2385	0.0221051	1	2.26626e-06	0.000102522	1	0.0573031	1	1	17.4511	0.0573031	1	1	0.000815661	1	region_9242	Foxe1
Ensembl Genes	13092	Galnt12	107	0.0218626	1	1	45.2385	0.0221051	1	2.26626e-06	0.000102522	1	0.0573031	1	1	17.4511	0.0573031	1	1	0.000815661	1	region_9057	Galnt12
Ensembl Genes	13144	Ptpn3	107	0.0218626	1	1	45.2385	0.0221051	1	2.26626e-06	0.000102522	1	0.0573031	1	1	17.4511	0.0573031	1	1	0.000815661	1	region_5864	Ptpn3
Ensembl Genes	13156	Zkscan16	107	0.0218626	1	1	45.2385	0.0221051	1	2.26626e-06	0.000102522	1	0.0573031	1	1	17.4511	0.0573031	1	1	0.000815661	1	region_2891	Zkscan16
Ensembl Genes	13157	Ptgr1	107	0.0218626	1	1	45.2385	0.0221051	1	2.26626e-06	0.000102522	1	0.0573031	1	1	17.4511	0.0573031	1	1	0.000815661	1	region_3321	Ptgr1
Ensembl Genes	10855	Nup160	107	0.0218626	1	1	45.2385	0.0221051	1	2.26626e-06	0.000102522	1	0.0573031	1	1	17.4511	0.0573031	1	1	0.000815661	1	region_1619	Nup160
Ensembl Genes	13226	Tlr4	107	0.0218626	1	1	45.2385	0.0221051	1	2.26626e-06	0.000102522	1	0.0573031	1	1	17.4511	0.0573031	1	1	0.000815661	1	region_6430	Tlr4
Ensembl Genes	13252	Nfib	107	0.0218626	1	1	45.2385	0.0221051	1	2.26626e-06	0.000102522	1	0.0573031	1	1	17.4511	0.0573031	1	1	0.000815661	1	region_1901	Nfib
Ensembl Genes	13308	4930553M12Rik	107	0.0218626	1	1	45.2385	0.0221051	1	2.26626e-06	0.000102522	1	0.0573031	1	1	17.4511	0.0573031	1	1	0.000815661	1	region_6049	4930553M12Rik
Ensembl Genes	13209	Col27a1	107	0.0218626	1	1	45.2385	0.0221051	1	2.26626e-06	0.000102522	1	0.0573031	1	1	17.4511	0.0573031	1	1	0.000815661	1	region_4058	Col27a1
Ensembl Genes	15697	Sspo	107	0.0218626	1	1	45.2385	0.0221051	1	2.26626e-06	0.000102522	1	0.0573031	1	1	17.4511	0.0573031	1	1	0.000815661	1	region_3774	Sspo
Ensembl Genes	13295	Gm13277	107	0.0218626	1	1	45.2385	0.0221051	1	2.26626e-06	0.000102522	1	0.0573031	1	1	17.4511	0.0573031	1	1	0.000815661	1	region_102	Gm13277
Ensembl Genes	13296	Gm13278	107	0.0218626	1	1	45.2385	0.0221051	1	2.26626e-06	0.000102522	1	0.0573031	1	1	17.4511	0.0573031	1	1	0.000815661	1	region_102	Gm13278
Ensembl Genes	13267	Plin2	107	0.0218626	1	1	45.2385	0.0221051	1	2.26626e-06	0.000102522	1	0.0573031	1	1	17.4511	0.0573031	1	1	0.000815661	1	region_1028	Plin2
Ensembl Genes	1331	Arhgap18	107	0.0218626	1	1	45.2385	0.0221051	1	2.26626e-06	0.000102522	1	0.0573031	1	1	17.4511	0.0573031	1	1	0.000815661	1	region_3370	Arhgap18
Ensembl Genes	13422	Echdc2	107	0.0218626	1	1	45.2385	0.0221051	1	2.26626e-06	0.000102522	1	0.0573031	1	1	17.4511	0.0573031	1	1	0.000815661	1	region_3029	Echdc2
Ensembl Genes	13315	Elavl2	107	0.0218626	1	1	45.2385	0.0221051	1	2.26626e-06	0.000102522	1	0.0573031	1	1	17.4511	0.0573031	1	1	0.000815661	1	region_2870	Elavl2
Ensembl Genes	13318	Tusc1	107	0.0218626	1	1	45.2385	0.0221051	1	2.26626e-06	0.000102522	1	0.0573031	1	1	17.4511	0.0573031	1	1	0.000815661	1	region_23	Tusc1
Ensembl Genes	13792	Cd52	107	0.0218626	1	1	45.2385	0.0221051	1	2.26626e-06	0.000102522	1	0.0573031	1	1	17.4511	0.0573031	1	1	0.000815661	1	region_3322	Cd52
Ensembl Genes	13310	Mtap	107	0.0218626	1	1	45.2385	0.0221051	1	2.26626e-06	0.000102522	1	0.0573031	1	1	17.4511	0.0573031	1	1	0.000815661	1	region_3710	Mtap
Ensembl Genes	13388	Plpp3	107	0.0218626	1	1	45.2385	0.0221051	1	2.26626e-06	0.000102522	1	0.0573031	1	1	17.4511	0.0573031	1	1	0.000815661	1	region_1985	Plpp3
Ensembl Genes	13471	Tal1	107	0.0218626	1	1	45.2385	0.0221051	1	2.26626e-06	0.000102522	1	0.0573031	1	1	17.4511	0.0573031	1	1	0.000815661	1	region_6625	Tal1
Ensembl Genes	1348	Tpd52l1	107	0.0218626	1	1	45.2385	0.0221051	1	2.26626e-06	0.000102522	1	0.0573031	1	1	17.4511	0.0573031	1	1	0.000815661	1	region_4331	Tpd52l1
Ensembl Genes	13400	Acot11	107	0.0218626	1	1	45.2385	0.0221051	1	2.26626e-06	0.000102522	1	0.0573031	1	1	17.4511	0.0573031	1	1	0.000815661	1	region_6965	Acot11
Ensembl Genes	13497	Pomgnt1	107	0.0218626	1	1	45.2385	0.0221051	1	2.26626e-06	0.000102522	1	0.0573031	1	1	17.4511	0.0573031	1	1	0.000815661	1	region_9211	Pomgnt1
Ensembl Genes	13498	Tspan1	107	0.0218626	1	1	45.2385	0.0221051	1	2.26626e-06	0.000102522	1	0.0573031	1	1	17.4511	0.0573031	1	1	0.000815661	1	region_3500	Tspan1
Ensembl Genes	13539	Artn	107	0.0218626	1	1	45.2385	0.0221051	1	2.26626e-06	0.000102522	1	0.0573031	1	1	17.4511	0.0573031	1	1	0.000815661	1	region_5723	Artn
Ensembl Genes	13542	Ptprf	107	0.0218626	1	1	45.2385	0.0221051	1	2.26626e-06	0.000102522	1	0.0573031	1	1	17.4511	0.0573031	1	1	0.000815661	1	region_4281	Ptprf
Ensembl Genes	13639	Epha10	107	0.0218626	1	1	45.2385	0.0221051	1	2.26626e-06	0.000102522	1	0.0573031	1	1	17.4511	0.0573031	1	1	0.000815661	1	region_4060	Epha10
Ensembl Genes	135	Mgat4a	107	0.0218626	1	1	45.2385	0.0221051	1	2.26626e-06	0.000102522	1	0.0573031	1	1	17.4511	0.0573031	1	1	0.000815661	1	region_806	Mgat4a
Ensembl Genes	13577	Ccdc30	107	0.0218626	1	1	45.2385	0.0221051	1	2.26626e-06	0.000102522	1	0.0573031	1	1	17.4511	0.0573031	1	1	0.000815661	1	region_741	Ccdc30
Ensembl Genes	13621	Macf1	107	0.0218626	1	1	45.2385	0.0221051	1	2.26626e-06	0.000102522	1	0.0573031	1	1	17.4511	0.0573031	1	1	0.000815661	1	region_5232	Macf1
Ensembl Genes	13630	Pou3f1	107	0.0218626	1	1	45.2385	0.0221051	1	2.26626e-06	0.000102522	1	0.0573031	1	1	17.4511	0.0573031	1	1	0.000815661	1	region_39	Pou3f1
Ensembl Genes	1362	Dse	107	0.0218626	1	1	45.2385	0.0221051	1	2.26626e-06	0.000102522	1	0.0573031	1	1	17.4511	0.0573031	1	1	0.000815661	1	region_7865	Dse
Ensembl Genes	13667	Tfap2e	107	0.0218626	1	1	45.2385	0.0221051	1	2.26626e-06	0.000102522	1	0.0573031	1	1	17.4511	0.0573031	1	1	0.000815661	1	region_5149	Tfap2e
Ensembl Genes	13769	Cd164l2	107	0.0218626	1	1	45.2385	0.0221051	1	2.26626e-06	0.000102522	1	0.0573031	1	1	17.4511	0.0573031	1	1	0.000815661	1	region_6872	Cd164l2
Ensembl Genes	13675	Dlgap3	107	0.0218626	1	1	45.2385	0.0221051	1	2.26626e-06	0.000102522	1	0.0573031	1	1	17.4511	0.0573031	1	1	0.000815661	1	region_277	Dlgap3
Ensembl Genes	13682	Csmd2	107	0.0218626	1	1	45.2385	0.0221051	1	2.26626e-06	0.000102522	1	0.0573031	1	1	17.4511	0.0573031	1	1	0.000815661	1	region_5663	Csmd2
Ensembl Genes	13689	Trim62	107	0.0218626	1	1	45.2385	0.0221051	1	2.26626e-06	0.000102522	1	0.0573031	1	1	17.4511	0.0573031	1	1	0.000815661	1	region_717	Trim62
Ensembl Genes	13703	Zbtb8b	107	0.0218626	1	1	45.2385	0.0221051	1	2.26626e-06	0.000102522	1	0.0573031	1	1	17.4511	0.0573031	1	1	0.000815661	1	region_6013	Zbtb8b
Ensembl Genes	13736	Laptm5	107	0.0218626	1	1	45.2385	0.0221051	1	2.26626e-06	0.000102522	1	0.0573031	1	1	17.4511	0.0573031	1	1	0.000815661	1	region_2326	Laptm5
Ensembl Genes	13777	Kdf1	107	0.0218626	1	1	45.2385	0.0221051	1	2.26626e-06	0.000102522	1	0.0573031	1	1	17.4511	0.0573031	1	1	0.000815661	1	region_1154	Kdf1
Ensembl Genes	1378	Traf3ip2	107	0.0218626	1	1	45.2385	0.0221051	1	2.26626e-06	0.000102522	1	0.0573031	1	1	17.4511	0.0573031	1	1	0.000815661	1	region_2927	Traf3ip2
Ensembl Genes	13797	Catsper4	107	0.0218626	1	1	45.2385	0.0221051	1	2.26626e-06	0.000102522	1	0.0573031	1	1	17.4511	0.0573031	1	1	0.000815661	1	region_6663	Catsper4
Ensembl Genes	14195	Abcb4	107	0.0218626	1	1	45.2385	0.0221051	1	2.26626e-06	0.000102522	1	0.0573031	1	1	17.4511	0.0573031	1	1	0.000815661	1	region_8537	Abcb4
Ensembl Genes	13854	C1qb	107	0.0218626	1	1	45.2385	0.0221051	1	2.26626e-06	0.000102522	1	0.0573031	1	1	17.4511	0.0573031	1	1	0.000815661	1	region_3796	C1qb
Ensembl Genes	13856	C1qa	107	0.0218626	1	1	45.2385	0.0221051	1	2.26626e-06	0.000102522	1	0.0573031	1	1	17.4511	0.0573031	1	1	0.000815661	1	region_5275	C1qa
Ensembl Genes	13925	Fam131c	107	0.0218626	1	1	45.2385	0.0221051	1	2.26626e-06	0.000102522	1	0.0573031	1	1	17.4511	0.0573031	1	1	0.000815661	1	region_7527	Fam131c
Ensembl Genes	13798	Cnksr1	107	0.0218626	1	1	45.2385	0.0221051	1	2.26626e-06	0.000102522	1	0.0573031	1	1	17.4511	0.0573031	1	1	0.000815661	1	region_2069	Cnksr1
Ensembl Genes	13859	Wnt4	107	0.0218626	1	1	45.2385	0.0221051	1	2.26626e-06	0.000102522	1	0.0573031	1	1	17.4511	0.0573031	1	1	0.000815661	1	region_9751	Wnt4
Ensembl Genes	13923	Arhgef19	107	0.0218626	1	1	45.2385	0.0221051	1	2.26626e-06	0.000102522	1	0.0573031	1	1	17.4511	0.0573031	1	1	0.000815661	1	region_2308	Arhgef19
Ensembl Genes	13924	Epha2	107	0.0218626	1	1	45.2385	0.0221051	1	2.26626e-06	0.000102522	1	0.0573031	1	1	17.4511	0.0573031	1	1	0.000815661	1	region_7342	Epha2
Ensembl Genes	13885	Pla2g5	107	0.0218626	1	1	45.2385	0.0221051	1	2.26626e-06	0.000102522	1	0.0573031	1	1	17.4511	0.0573031	1	1	0.000815661	1	region_2327	Pla2g5
Ensembl Genes	13933	Tmem82	107	0.0218626	1	1	45.2385	0.0221051	1	2.26626e-06	0.000102522	1	0.0573031	1	1	17.4511	0.0573031	1	1	0.000815661	1	region_7931	Tmem82
Ensembl Genes	14090	Ajap1	107	0.0218626	1	1	45.2385	0.0221051	1	2.26626e-06	0.000102522	1	0.0573031	1	1	17.4511	0.0573031	1	1	0.000815661	1	region_4606	Ajap1
Ensembl Genes	13934	Slc25a34	107	0.0218626	1	1	45.2385	0.0221051	1	2.26626e-06	0.000102522	1	0.0573031	1	1	17.4511	0.0573031	1	1	0.000815661	1	region_1350	Slc25a34
Ensembl Genes	13935	Plekhm2	107	0.0218626	1	1	45.2385	0.0221051	1	2.26626e-06	0.000102522	1	0.0573031	1	1	17.4511	0.0573031	1	1	0.000815661	1	region_427	Plekhm2
Ensembl Genes	1395	Gpr6	107	0.0218626	1	1	45.2385	0.0221051	1	2.26626e-06	0.000102522	1	0.0573031	1	1	17.4511	0.0573031	1	1	0.000815661	1	region_3082	Gpr6
Ensembl Genes	14064	Tnfrsf9	107	0.0218626	1	1	45.2385	0.0221051	1	2.26626e-06	0.000102522	1	0.0573031	1	1	17.4511	0.0573031	1	1	0.000815661	1	region_8583	Tnfrsf9
Ensembl Genes	14082	Gpr153	107	0.0218626	1	1	45.2385	0.0221051	1	2.26626e-06	0.000102522	1	0.0573031	1	1	17.4511	0.0573031	1	1	0.000815661	1	region_3250	Gpr153
Ensembl Genes	14095	Smim1	107	0.0218626	1	1	45.2385	0.0221051	1	2.26626e-06	0.000102522	1	0.0573031	1	1	17.4511	0.0573031	1	1	0.000815661	1	region_3408	Smim1
Ensembl Genes	14100	Megf6	107	0.0218626	1	1	45.2385	0.0221051	1	2.26626e-06	0.000102522	1	0.0573031	1	1	17.4511	0.0573031	1	1	0.000815661	1	region_6031	Megf6
Ensembl Genes	13890	Tmco4	107	0.0218626	1	1	45.2385	0.0221051	1	2.26626e-06	0.000102522	1	0.0573031	1	1	17.4511	0.0573031	1	1	0.000815661	1	region_1344	Tmco4
Ensembl Genes	14101	Arhgef16	107	0.0218626	1	1	45.2385	0.0221051	1	2.26626e-06	0.000102522	1	0.0573031	1	1	17.4511	0.0573031	1	1	0.000815661	1	region_8763	Arhgef16
Ensembl Genes	14176	Fzd1	107	0.0218626	1	1	45.2385	0.0221051	1	2.26626e-06	0.000102522	1	0.0573031	1	1	17.4511	0.0573031	1	1	0.000815661	1	region_5879	Fzd1
Ensembl Genes	14287	Prkag2	107	0.0218626	1	1	45.2385	0.0221051	1	2.26626e-06	0.000102522	1	0.0573031	1	1	17.4511	0.0573031	1	1	0.000815661	1	region_8755	Prkag2
Ensembl Genes	14312	En2	107	0.0218626	1	1	45.2385	0.0221051	1	2.26626e-06	0.000102522	1	0.0573031	1	1	17.4511	0.0573031	1	1	0.000815661	1	region_8774	En2
Ensembl Genes	14151	Ttll10	107	0.0218626	1	1	45.2385	0.0221051	1	2.26626e-06	0.000102522	1	0.0573031	1	1	17.4511	0.0573031	1	1	0.000815661	1	region_8521	Ttll10
Ensembl Genes	1415	9030612E09Rik	107	0.0218626	1	1	45.2385	0.0221051	1	2.26626e-06	0.000102522	1	0.0573031	1	1	17.4511	0.0573031	1	1	0.000815661	1	region_3108	9030612E09Rik
Ensembl Genes	14231	Hgf	107	0.0218626	1	1	45.2385	0.0221051	1	2.26626e-06	0.000102522	1	0.0573031	1	1	17.4511	0.0573031	1	1	0.000815661	1	region_7641	Hgf
Ensembl Genes	14189	Adam22	107	0.0218626	1	1	45.2385	0.0221051	1	2.26626e-06	0.000102522	1	0.0573031	1	1	17.4511	0.0573031	1	1	0.000815661	1	region_4628	Adam22
Ensembl Genes	14188	Sri	107	0.0218626	1	1	45.2385	0.0221051	1	2.26626e-06	0.000102522	1	0.0573031	1	1	17.4511	0.0573031	1	1	0.000815661	1	region_2783	Sri
Ensembl Genes	14400	Gm1673	107	0.0218626	1	1	45.2385	0.0221051	1	2.26626e-06	0.000102522	1	0.0573031	1	1	17.4511	0.0573031	1	1	0.000815661	1	region_3490	Gm1673
Ensembl Genes	14401	Nat8l	107	0.0218626	1	1	45.2385	0.0221051	1	2.26626e-06	0.000102522	1	0.0573031	1	1	17.4511	0.0573031	1	1	0.000815661	1	region_8047	Nat8l
Ensembl Genes	14326	Garem2	107	0.0218626	1	1	45.2385	0.0221051	1	2.26626e-06	0.000102522	1	0.0573031	1	1	17.4511	0.0573031	1	1	0.000815661	1	region_5791	Garem2
Ensembl Genes	14334	Cib4	107	0.0218626	1	1	45.2385	0.0221051	1	2.26626e-06	0.000102522	1	0.0573031	1	1	17.4511	0.0573031	1	1	0.000815661	1	region_5203	Cib4
Ensembl Genes	1414	Sobp	107	0.0218626	1	1	45.2385	0.0221051	1	2.26626e-06	0.000102522	1	0.0573031	1	1	17.4511	0.0573031	1	1	0.000815661	1	region_3108	Sobp
Ensembl Genes	14325	3110082J24Rik	107	0.0218626	1	1	45.2385	0.0221051	1	2.26626e-06	0.000102522	1	0.0573031	1	1	17.4511	0.0573031	1	1	0.000815661	1	region_5791	3110082J24Rik
Ensembl Genes	14364	Krtcap3	107	0.0218626	1	1	45.2385	0.0221051	1	2.26626e-06	0.000102522	1	0.0573031	1	1	17.4511	0.0573031	1	1	0.000815661	1	region_2935	Krtcap3
Ensembl Genes	14422	Hmx1	107	0.0218626	1	1	45.2385	0.0221051	1	2.26626e-06	0.000102522	1	0.0573031	1	1	17.4511	0.0573031	1	1	0.000815661	1	region_2615	Hmx1
Ensembl Genes	14396	Fgfr3	107	0.0218626	1	1	45.2385	0.0221051	1	2.26626e-06	0.000102522	1	0.0573031	1	1	17.4511	0.0573031	1	1	0.000815661	1	region_1135	Fgfr3
Ensembl Genes	14427	Sh3tc1	107	0.0218626	1	1	45.2385	0.0221051	1	2.26626e-06	0.000102522	1	0.0573031	1	1	17.4511	0.0573031	1	1	0.000815661	1	region_689	Sh3tc1
Ensembl Genes	13848	6030445D17Rik	107	0.0218626	1	1	45.2385	0.0221051	1	2.26626e-06	0.000102522	1	0.0573031	1	1	17.4511	0.0573031	1	1	0.000815661	1	region_574	6030445D17Rik
Ensembl Genes	14452	Nsg1	107	0.0218626	1	1	45.2385	0.0221051	1	2.26626e-06	0.000102522	1	0.0573031	1	1	17.4511	0.0573031	1	1	0.000815661	1	region_8952	Nsg1
Ensembl Genes	14462	Hs3st1	107	0.0218626	1	1	45.2385	0.0221051	1	2.26626e-06	0.000102522	1	0.0573031	1	1	17.4511	0.0573031	1	1	0.000815661	1	region_6919	Hs3st1
Ensembl Genes	14492	Ccdc149	107	0.0218626	1	1	45.2385	0.0221051	1	2.26626e-06	0.000102522	1	0.0573031	1	1	17.4511	0.0573031	1	1	0.000815661	1	region_1338	Ccdc149
Ensembl Genes	14510	0610040J01Rik	107	0.0218626	1	1	45.2385	0.0221051	1	2.26626e-06	0.000102522	1	0.0573031	1	1	17.4511	0.0573031	1	1	0.000815661	1	region_1828	0610040J01Rik
Ensembl Genes	14513	Tbc1d1	107	0.0218626	1	1	45.2385	0.0221051	1	2.26626e-06	0.000102522	1	0.0573031	1	1	17.4511	0.0573031	1	1	0.000815661	1	region_4068	Tbc1d1
Ensembl Genes	14698	Cxcl10	107	0.0218626	1	1	45.2385	0.0221051	1	2.26626e-06	0.000102522	1	0.0573031	1	1	17.4511	0.0573031	1	1	0.000815661	1	region_4773	Cxcl10
Ensembl Genes	14516	Tlr6	107	0.0218626	1	1	45.2385	0.0221051	1	2.26626e-06	0.000102522	1	0.0573031	1	1	17.4511	0.0573031	1	1	0.000815661	1	region_1889	Tlr6
Ensembl Genes	1453	Man1a	107	0.0218626	1	1	45.2385	0.0221051	1	2.26626e-06	0.000102522	1	0.0573031	1	1	17.4511	0.0573031	1	1	0.000815661	1	region_3418	Man1a
Ensembl Genes	14542	Bend4	107	0.0218626	1	1	45.2385	0.0221051	1	2.26626e-06	0.000102522	1	0.0573031	1	1	17.4511	0.0573031	1	1	0.000815661	1	region_1928	Bend4
Ensembl Genes	14548	Kctd8	107	0.0218626	1	1	45.2385	0.0221051	1	2.26626e-06	0.000102522	1	0.0573031	1	1	17.4511	0.0573031	1	1	0.000815661	1	region_664	Kctd8
Ensembl Genes	1455	Msl3l2	107	0.0218626	1	1	45.2385	0.0221051	1	2.26626e-06	0.000102522	1	0.0573031	1	1	17.4511	0.0573031	1	1	0.000815661	1	region_5745	Msl3l2
Ensembl Genes	14584	Pdgfra	107	0.0218626	1	1	45.2385	0.0221051	1	2.26626e-06	0.000102522	1	0.0573031	1	1	17.4511	0.0573031	1	1	0.000815661	1	region_2361	Pdgfra
Ensembl Genes	14586	Kdr	107	0.0218626	1	1	45.2385	0.0221051	1	2.26626e-06	0.000102522	1	0.0573031	1	1	17.4511	0.0573031	1	1	0.000815661	1	region_6838	Kdr
Ensembl Genes	14607	Igfbp7	107	0.0218626	1	1	45.2385	0.0221051	1	2.26626e-06	0.000102522	1	0.0573031	1	1	17.4511	0.0573031	1	1	0.000815661	1	region_624	Igfbp7
Ensembl Genes	14610	Epha5	107	0.0218626	1	1	45.2385	0.0221051	1	2.26626e-06	0.000102522	1	0.0573031	1	1	17.4511	0.0573031	1	1	0.000815661	1	region_823	Epha5
Ensembl Genes	14662	Slc4a4	107	0.0218626	1	1	45.2385	0.0221051	1	2.26626e-06	0.000102522	1	0.0573031	1	1	17.4511	0.0573031	1	1	0.000815661	1	region_8616	Slc4a4
Ensembl Genes	14673	Rassf6	107	0.0218626	1	1	45.2385	0.0221051	1	2.26626e-06	0.000102522	1	0.0573031	1	1	17.4511	0.0573031	1	1	0.000815661	1	region_6656	Rassf6
Ensembl Genes	14680	Cxcl2	107	0.0218626	1	1	45.2385	0.0221051	1	2.26626e-06	0.000102522	1	0.0573031	1	1	17.4511	0.0573031	1	1	0.000815661	1	region_7707	Cxcl2
Ensembl Genes	14553	Gabra2	107	0.0218626	1	1	45.2385	0.0221051	1	2.26626e-06	0.000102522	1	0.0573031	1	1	17.4511	0.0573031	1	1	0.000815661	1	region_2652	Gabra2
Ensembl Genes	1490	Gm17455	107	0.0218626	1	1	45.2385	0.0221051	1	2.26626e-06	0.000102522	1	0.0573031	1	1	17.4511	0.0573031	1	1	0.000815661	1	region_7522	Gm17455
Ensembl Genes	14748	Fgf5	107	0.0218626	1	1	45.2385	0.0221051	1	2.26626e-06	0.000102522	1	0.0573031	1	1	17.4511	0.0573031	1	1	0.000815661	1	region_6155	Fgf5
Ensembl Genes	14769	Gpat3	107	0.0218626	1	1	45.2385	0.0221051	1	2.26626e-06	0.000102522	1	0.0573031	1	1	17.4511	0.0573031	1	1	0.000815661	1	region_1066	Gpat3
Ensembl Genes	14770	Nkx6-1	107	0.0218626	1	1	45.2385	0.0221051	1	2.26626e-06	0.000102522	1	0.0573031	1	1	17.4511	0.0573031	1	1	0.000815661	1	region_2242	Nkx6-1
Ensembl Genes	1471	Sh3rf3	107	0.0218626	1	1	45.2385	0.0221051	1	2.26626e-06	0.000102522	1	0.0573031	1	1	17.4511	0.0573031	1	1	0.000815661	1	region_3202	Sh3rf3
Ensembl Genes	148	Chst10	107	0.0218626	1	1	45.2385	0.0221051	1	2.26626e-06	0.000102522	1	0.0573031	1	1	17.4511	0.0573031	1	1	0.000815661	1	region_3561	Chst10
Ensembl Genes	3110	Ccl12	107	0.0218626	1	1	45.2385	0.0221051	1	2.26626e-06	0.000102522	1	0.0573031	1	1	17.4511	0.0573031	1	1	0.000815661	1	region_2603	Ccl12
Ensembl Genes	14702	Stbd1	107	0.0218626	1	1	45.2385	0.0221051	1	2.26626e-06	0.000102522	1	0.0573031	1	1	17.4511	0.0573031	1	1	0.000815661	1	region_4491	Stbd1
Ensembl Genes	14887	Srrd	107	0.0218626	1	1	45.2385	0.0221051	1	2.26626e-06	0.000102522	1	0.0573031	1	1	17.4511	0.0573031	1	1	0.000815661	1	region_32	Srrd
Ensembl Genes	14894	Grk3	107	0.0218626	1	1	45.2385	0.0221051	1	2.26626e-06	0.000102522	1	0.0573031	1	1	17.4511	0.0573031	1	1	0.000815661	1	region_7355	Grk3
Ensembl Genes	14888	Hps4	107	0.0218626	1	1	45.2385	0.0221051	1	2.26626e-06	0.000102522	1	0.0573031	1	1	17.4511	0.0573031	1	1	0.000815661	1	region_32	Hps4
Ensembl Genes	14907	Tmem119	107	0.0218626	1	1	45.2385	0.0221051	1	2.26626e-06	0.000102522	1	0.0573031	1	1	17.4511	0.0573031	1	1	0.000815661	1	region_8852	Tmem119
Ensembl Genes	1489	Vsir	107	0.0218626	1	1	45.2385	0.0221051	1	2.26626e-06	0.000102522	1	0.0573031	1	1	17.4511	0.0573031	1	1	0.000815661	1	region_581	Vsir
Ensembl Genes	14890	Asphd2	107	0.0218626	1	1	45.2385	0.0221051	1	2.26626e-06	0.000102522	1	0.0573031	1	1	17.4511	0.0573031	1	1	0.000815661	1	region_4720	Asphd2
Ensembl Genes	14935	Oasl1	107	0.0218626	1	1	45.2385	0.0221051	1	2.26626e-06	0.000102522	1	0.0573031	1	1	17.4511	0.0573031	1	1	0.000815661	1	region_602	Oasl1
Ensembl Genes	14977	Hrk	107	0.0218626	1	1	45.2385	0.0221051	1	2.26626e-06	0.000102522	1	0.0573031	1	1	17.4511	0.0573031	1	1	0.000815661	1	region_2503	Hrk
Ensembl Genes	14943	Cabp1	107	0.0218626	1	1	45.2385	0.0221051	1	2.26626e-06	0.000102522	1	0.0573031	1	1	17.4511	0.0573031	1	1	0.000815661	1	region_491	Cabp1
Ensembl Genes	14962	Tmem233	107	0.0218626	1	1	45.2385	0.0221051	1	2.26626e-06	0.000102522	1	0.0573031	1	1	17.4511	0.0573031	1	1	0.000815661	1	region_3541	Tmem233
Ensembl Genes	15441	Slc25a13	107	0.0218626	1	1	45.2385	0.0221051	1	2.26626e-06	0.000102522	1	0.0573031	1	1	17.4511	0.0573031	1	1	0.000815661	1	region_5346	Slc25a13
Ensembl Genes	14994	Rasal1	107	0.0218626	1	1	45.2385	0.0221051	1	2.26626e-06	0.000102522	1	0.0573031	1	1	17.4511	0.0573031	1	1	0.000815661	1	region_2188	Rasal1
Ensembl Genes	15028	Hvcn1	107	0.0218626	1	1	45.2385	0.0221051	1	2.26626e-06	0.000102522	1	0.0573031	1	1	17.4511	0.0573031	1	1	0.000815661	1	region_8334	Hvcn1
Ensembl Genes	15039	P2rx7	107	0.0218626	1	1	45.2385	0.0221051	1	2.26626e-06	0.000102522	1	0.0573031	1	1	17.4511	0.0573031	1	1	0.000815661	1	region_1294	P2rx7
Ensembl Genes	15217	Actl6b	107	0.0218626	1	1	45.2385	0.0221051	1	2.26626e-06	0.000102522	1	0.0573031	1	1	17.4511	0.0573031	1	1	0.000815661	1	region_6993	Actl6b
Ensembl Genes	15017	Aldh2	107	0.0218626	1	1	45.2385	0.0221051	1	2.26626e-06	0.000102522	1	0.0573031	1	1	17.4511	0.0573031	1	1	0.000815661	1	region_2269	Aldh2
Ensembl Genes	1513	Hk1	107	0.0218626	1	1	45.2385	0.0221051	1	2.26626e-06	0.000102522	1	0.0573031	1	1	17.4511	0.0573031	1	1	0.000815661	1	region_1900	Hk1
Ensembl Genes	15146	Lat2	107	0.0218626	1	1	45.2385	0.0221051	1	2.26626e-06	0.000102522	1	0.0573031	1	1	17.4511	0.0573031	1	1	0.000815661	1	region_8012	Lat2
Ensembl Genes	15149	Eln	107	0.0218626	1	1	45.2385	0.0221051	1	2.26626e-06	0.000102522	1	0.0573031	1	1	17.4511	0.0573031	1	1	0.000815661	1	region_809	Eln
Ensembl Genes	15140	Ncf1	107	0.0218626	1	1	45.2385	0.0221051	1	2.26626e-06	0.000102522	1	0.0573031	1	1	17.4511	0.0573031	1	1	0.000815661	1	region_8717	Ncf1
Ensembl Genes	15227	Nyap1	107	0.0218626	1	1	45.2385	0.0221051	1	2.26626e-06	0.000102522	1	0.0573031	1	1	17.4511	0.0573031	1	1	0.000815661	1	region_2542	Nyap1
Ensembl Genes	15404	Alox5ap	107	0.0218626	1	1	45.2385	0.0221051	1	2.26626e-06	0.000102522	1	0.0573031	1	1	17.4511	0.0573031	1	1	0.000815661	1	region_3835	Alox5ap
Ensembl Genes	15262	Fam20c	107	0.0218626	1	1	45.2385	0.0221051	1	2.26626e-06	0.000102522	1	0.0573031	1	1	17.4511	0.0573031	1	1	0.000815661	1	region_4765	Fam20c
Ensembl Genes	15274	C130050O18Rik	107	0.0218626	1	1	45.2385	0.0221051	1	2.26626e-06	0.000102522	1	0.0573031	1	1	17.4511	0.0573031	1	1	0.000815661	1	region_8462	C130050O18Rik
Ensembl Genes	15349	Arpc1b	107	0.0218626	1	1	45.2385	0.0221051	1	2.26626e-06	0.000102522	1	0.0573031	1	1	17.4511	0.0573031	1	1	0.000815661	1	region_8502	Arpc1b
Ensembl Genes	15375	4930449I24Rik	107	0.0218626	1	1	45.2385	0.0221051	1	2.26626e-06	0.000102522	1	0.0573031	1	1	17.4511	0.0573031	1	1	0.000815661	1	region_3340	4930449I24Rik
Ensembl Genes	15376	Gm3402	107	0.0218626	1	1	45.2385	0.0221051	1	2.26626e-06	0.000102522	1	0.0573031	1	1	17.4511	0.0573031	1	1	0.000815661	1	region_3312	Gm3402
Ensembl Genes	15411	Fry	107	0.0218626	1	1	45.2385	0.0221051	1	2.26626e-06	0.000102522	1	0.0573031	1	1	17.4511	0.0573031	1	1	0.000815661	1	region_1046	Fry
Ensembl Genes	15414	N4bp2l1	107	0.0218626	1	1	45.2385	0.0221051	1	2.26626e-06	0.000102522	1	0.0573031	1	1	17.4511	0.0573031	1	1	0.000815661	1	region_1407	N4bp2l1
Ensembl Genes	15455	Ica1	107	0.0218626	1	1	45.2385	0.0221051	1	2.26626e-06	0.000102522	1	0.0573031	1	1	17.4511	0.0573031	1	1	0.000815661	1	region_3008	Ica1
Ensembl Genes	15459	Thsd7a	107	0.0218626	1	1	45.2385	0.0221051	1	2.26626e-06	0.000102522	1	0.0573031	1	1	17.4511	0.0573031	1	1	0.000815661	1	region_8171	Thsd7a
Ensembl Genes	15470	Tes	107	0.0218626	1	1	45.2385	0.0221051	1	2.26626e-06	0.000102522	1	0.0573031	1	1	17.4511	0.0573031	1	1	0.000815661	1	region_6257	Tes
Ensembl Genes	15475	St7	107	0.0218626	1	1	45.2385	0.0221051	1	2.26626e-06	0.000102522	1	0.0573031	1	1	17.4511	0.0573031	1	1	0.000815661	1	region_6320	St7
Ensembl Genes	15529	Kcp	107	0.0218626	1	1	45.2385	0.0221051	1	2.26626e-06	0.000102522	1	0.0573031	1	1	17.4511	0.0573031	1	1	0.000815661	1	region_9474	Kcp
Ensembl Genes	15468	Mdfic	107	0.0218626	1	1	45.2385	0.0221051	1	2.26626e-06	0.000102522	1	0.0573031	1	1	17.4511	0.0573031	1	1	0.000815661	1	region_9431	Mdfic
Ensembl Genes	15490	Fezf1	107	0.0218626	1	1	45.2385	0.0221051	1	2.26626e-06	0.000102522	1	0.0573031	1	1	17.4511	0.0573031	1	1	0.000815661	1	region_6598	Fezf1
Ensembl Genes	15518	Prrt4	107	0.0218626	1	1	45.2385	0.0221051	1	2.26626e-06	0.000102522	1	0.0573031	1	1	17.4511	0.0573031	1	1	0.000815661	1	region_2529	Prrt4
Ensembl Genes	15521	Fam71f2	107	0.0218626	1	1	45.2385	0.0221051	1	2.26626e-06	0.000102522	1	0.0573031	1	1	17.4511	0.0573031	1	1	0.000815661	1	region_270	Fam71f2
Ensembl Genes	15515	Lrrc4	107	0.0218626	1	1	45.2385	0.0221051	1	2.26626e-06	0.000102522	1	0.0573031	1	1	17.4511	0.0573031	1	1	0.000815661	1	region_4404	Lrrc4
Ensembl Genes	15530	Irf5	107	0.0218626	1	1	45.2385	0.0221051	1	2.26626e-06	0.000102522	1	0.0573031	1	1	17.4511	0.0573031	1	1	0.000815661	1	region_3733	Irf5
Ensembl Genes	1566	Rsph14	107	0.0218626	1	1	45.2385	0.0221051	1	2.26626e-06	0.000102522	1	0.0573031	1	1	17.4511	0.0573031	1	1	0.000815661	1	region_8804	Rsph14
Ensembl Genes	1556	Slc16a9	107	0.0218626	1	1	45.2385	0.0221051	1	2.26626e-06	0.000102522	1	0.0573031	1	1	17.4511	0.0573031	1	1	0.000815661	1	region_5385	Slc16a9
Ensembl Genes	15586	Zc3hav1l	107	0.0218626	1	1	45.2385	0.0221051	1	2.26626e-06	0.000102522	1	0.0573031	1	1	17.4511	0.0573031	1	1	0.000815661	1	region_2358	Zc3hav1l
Ensembl Genes	15587	Zc3hav1	107	0.0218626	1	1	45.2385	0.0221051	1	2.26626e-06	0.000102522	1	0.0573031	1	1	17.4511	0.0573031	1	1	0.000815661	1	region_341	Zc3hav1
Ensembl Genes	15592	Klrg2	107	0.0218626	1	1	45.2385	0.0221051	1	2.26626e-06	0.000102522	1	0.0573031	1	1	17.4511	0.0573031	1	1	0.000815661	1	region_4070	Klrg2
Ensembl Genes	156	Creg2	107	0.0218626	1	1	45.2385	0.0221051	1	2.26626e-06	0.000102522	1	0.0573031	1	1	17.4511	0.0573031	1	1	0.000815661	1	region_2058	Creg2
Ensembl Genes	15664	Tcaf1	107	0.0218626	1	1	45.2385	0.0221051	1	2.26626e-06	0.000102522	1	0.0573031	1	1	17.4511	0.0573031	1	1	0.000815661	1	region_3532	Tcaf1
Ensembl Genes	1568	Rab36	107	0.0218626	1	1	45.2385	0.0221051	1	2.26626e-06	0.000102522	1	0.0573031	1	1	17.4511	0.0573031	1	1	0.000815661	1	region_8804	Rab36
Ensembl Genes	17188	Prodh2	107	0.0218626	1	1	45.2385	0.0221051	1	2.26626e-06	0.000102522	1	0.0573031	1	1	17.4511	0.0573031	1	1	0.000815661	1	region_4397	Prodh2
Ensembl Genes	1571	Adora2a	107	0.0218626	1	1	45.2385	0.0221051	1	2.26626e-06	0.000102522	1	0.0573031	1	1	17.4511	0.0573031	1	1	0.000815661	1	region_3296	Adora2a
Ensembl Genes	15716	Tmem176b	107	0.0218626	1	1	45.2385	0.0221051	1	2.26626e-06	0.000102522	1	0.0573031	1	1	17.4511	0.0573031	1	1	0.000815661	1	region_915	Tmem176b
Ensembl Genes	15717	Tmem176a	107	0.0218626	1	1	45.2385	0.0221051	1	2.26626e-06	0.000102522	1	0.0573031	1	1	17.4511	0.0573031	1	1	0.000815661	1	region_915	Tmem176a
Ensembl Genes	15747	Hoxa5	107	0.0218626	1	1	45.2385	0.0221051	1	2.26626e-06	0.000102522	1	0.0573031	1	1	17.4511	0.0573031	1	1	0.000815661	1	region_8976	Hoxa5
Ensembl Genes	1575	Lrrc75b	107	0.0218626	1	1	45.2385	0.0221051	1	2.26626e-06	0.000102522	1	0.0573031	1	1	17.4511	0.0573031	1	1	0.000815661	1	region_3182	Lrrc75b
Ensembl Genes	15761	Chn2	107	0.0218626	1	1	45.2385	0.0221051	1	2.26626e-06	0.000102522	1	0.0573031	1	1	17.4511	0.0573031	1	1	0.000815661	1	region_4464	Chn2
Ensembl Genes	15948	Dysf	107	0.0218626	1	1	45.2385	0.0221051	1	2.26626e-06	0.000102522	1	0.0573031	1	1	17.4511	0.0573031	1	1	0.000815661	1	region_9715	Dysf
Ensembl Genes	15763	Wipf3	107	0.0218626	1	1	45.2385	0.0221051	1	2.26626e-06	0.000102522	1	0.0573031	1	1	17.4511	0.0573031	1	1	0.000815661	1	region_7223	Wipf3
Ensembl Genes	15823	Fam13a	107	0.0218626	1	1	45.2385	0.0221051	1	2.26626e-06	0.000102522	1	0.0573031	1	1	17.4511	0.0573031	1	1	0.000815661	1	region_4137	Fam13a
Ensembl Genes	15825	Gprin3	107	0.0218626	1	1	45.2385	0.0221051	1	2.26626e-06	0.000102522	1	0.0573031	1	1	17.4511	0.0573031	1	1	0.000815661	1	region_7896	Gprin3
Ensembl Genes	15832	Hpgds	107	0.0218626	1	1	45.2385	0.0221051	1	2.26626e-06	0.000102522	1	0.0573031	1	1	17.4511	0.0573031	1	1	0.000815661	1	region_4256	Hpgds
Ensembl Genes	15835	Ndnf	107	0.0218626	1	1	45.2385	0.0221051	1	2.26626e-06	0.000102522	1	0.0573031	1	1	17.4511	0.0573031	1	1	0.000815661	1	region_3806	Ndnf
Ensembl Genes	15836	Prdm5	107	0.0218626	1	1	45.2385	0.0221051	1	2.26626e-06	0.000102522	1	0.0573031	1	1	17.4511	0.0573031	1	1	0.000815661	1	region_8666	Prdm5
Ensembl Genes	15856	Foxi3	107	0.0218626	1	1	45.2385	0.0221051	1	2.26626e-06	0.000102522	1	0.0573031	1	1	17.4511	0.0573031	1	1	0.000815661	1	region_7619	Foxi3
Ensembl Genes	15867	Reep1	107	0.0218626	1	1	45.2385	0.0221051	1	2.26626e-06	0.000102522	1	0.0573031	1	1	17.4511	0.0573031	1	1	0.000815661	1	region_1508	Reep1
Ensembl Genes	15883	Sh2d6	107	0.0218626	1	1	45.2385	0.0221051	1	2.26626e-06	0.000102522	1	0.0573031	1	1	17.4511	0.0573031	1	1	0.000815661	1	region_9580	Sh2d6
Ensembl Genes	15907	Eva1a	107	0.0218626	1	1	45.2385	0.0221051	1	2.26626e-06	0.000102522	1	0.0573031	1	1	17.4511	0.0573031	1	1	0.000815661	1	region_3118	Eva1a
Ensembl Genes	15913	Dok1	107	0.0218626	1	1	45.2385	0.0221051	1	2.26626e-06	0.000102522	1	0.0573031	1	1	17.4511	0.0573031	1	1	0.000815661	1	region_2733	Dok1
Ensembl Genes	15914	Loxl3	107	0.0218626	1	1	45.2385	0.0221051	1	2.26626e-06	0.000102522	1	0.0573031	1	1	17.4511	0.0573031	1	1	0.000815661	1	region_2733	Loxl3
Ensembl Genes	15960	Fbxo41	107	0.0218626	1	1	45.2385	0.0221051	1	2.26626e-06	0.000102522	1	0.0573031	1	1	17.4511	0.0573031	1	1	0.000815661	1	region_3205	Fbxo41
Ensembl Genes	16126	Camk1	107	0.0218626	1	1	45.2385	0.0221051	1	2.26626e-06	0.000102522	1	0.0573031	1	1	17.4511	0.0573031	1	1	0.000815661	1	region_6633	Camk1
Ensembl Genes	15974	Add2	107	0.0218626	1	1	45.2385	0.0221051	1	2.26626e-06	0.000102522	1	0.0573031	1	1	17.4511	0.0573031	1	1	0.000815661	1	region_4335	Add2
Ensembl Genes	15975	Tgfa	107	0.0218626	1	1	45.2385	0.0221051	1	2.26626e-06	0.000102522	1	0.0573031	1	1	17.4511	0.0573031	1	1	0.000815661	1	region_181	Tgfa
Ensembl Genes	15991	D6Ertd527e	107	0.0218626	1	1	45.2385	0.0221051	1	2.26626e-06	0.000102522	1	0.0573031	1	1	17.4511	0.0573031	1	1	0.000815661	1	region_722	D6Ertd527e
Ensembl Genes	15992	Antxr1	107	0.0218626	1	1	45.2385	0.0221051	1	2.26626e-06	0.000102522	1	0.0573031	1	1	17.4511	0.0573031	1	1	0.000815661	1	region_7431	Antxr1
Ensembl Genes	15997	Arhgap25	107	0.0218626	1	1	45.2385	0.0221051	1	2.26626e-06	0.000102522	1	0.0573031	1	1	17.4511	0.0573031	1	1	0.000815661	1	region_3167	Arhgap25
Ensembl Genes	17199	Upk1a	107	0.0218626	1	1	45.2385	0.0221051	1	2.26626e-06	0.000102522	1	0.0573031	1	1	17.4511	0.0573031	1	1	0.000815661	1	region_3735	Upk1a
Ensembl Genes	16017	Mgll	107	0.0218626	1	1	45.2385	0.0221051	1	2.26626e-06	0.000102522	1	0.0573031	1	1	17.4511	0.0573031	1	1	0.000815661	1	region_9330	Mgll
Ensembl Genes	16053	Wnt7a	107	0.0218626	1	1	45.2385	0.0221051	1	2.26626e-06	0.000102522	1	0.0573031	1	1	17.4511	0.0573031	1	1	0.000815661	1	region_4199	Wnt7a
Ensembl Genes	1607	Col6a2	107	0.0218626	1	1	45.2385	0.0221051	1	2.26626e-06	0.000102522	1	0.0573031	1	1	17.4511	0.0573031	1	1	0.000815661	1	region_4057	Col6a2
Ensembl Genes	16076	Suclg2	107	0.0218626	1	1	45.2385	0.0221051	1	2.26626e-06	0.000102522	1	0.0573031	1	1	17.4511	0.0573031	1	1	0.000815661	1	region_1415	Suclg2
Ensembl Genes	16148	Slc6a1	107	0.0218626	1	1	45.2385	0.0221051	1	2.26626e-06	0.000102522	1	0.0573031	1	1	17.4511	0.0573031	1	1	0.000815661	1	region_5665	Slc6a1
Ensembl Genes	16091	Gpr27	107	0.0218626	1	1	45.2385	0.0221051	1	2.26626e-06	0.000102522	1	0.0573031	1	1	17.4511	0.0573031	1	1	0.000815661	1	region_9560	Gpr27
Ensembl Genes	16112	Grm7	107	0.0218626	1	1	45.2385	0.0221051	1	2.26626e-06	0.000102522	1	0.0573031	1	1	17.4511	0.0573031	1	1	0.000815661	1	region_6108	Grm7
Ensembl Genes	16162	Cand2	107	0.0218626	1	1	45.2385	0.0221051	1	2.26626e-06	0.000102522	1	0.0573031	1	1	17.4511	0.0573031	1	1	0.000815661	1	region_4716	Cand2
Ensembl Genes	16192	Ret	107	0.0218626	1	1	45.2385	0.0221051	1	2.26626e-06	0.000102522	1	0.0573031	1	1	17.4511	0.0573031	1	1	0.000815661	1	region_6812	Ret
Ensembl Genes	16182	Rassf4	107	0.0218626	1	1	45.2385	0.0221051	1	2.26626e-06	0.000102522	1	0.0573031	1	1	17.4511	0.0573031	1	1	0.000815661	1	region_1274	Rassf4
Ensembl Genes	16185	Cxcl12	107	0.0218626	1	1	45.2385	0.0221051	1	2.26626e-06	0.000102522	1	0.0573031	1	1	17.4511	0.0573031	1	1	0.000815661	1	region_2231	Cxcl12
Ensembl Genes	162	Il1rl2	107	0.0218626	1	1	45.2385	0.0221051	1	2.26626e-06	0.000102522	1	0.0573031	1	1	17.4511	0.0573031	1	1	0.000815661	1	region_9499	Il1rl2
Ensembl Genes	1620	Tspear	107	0.0218626	1	1	45.2385	0.0221051	1	2.26626e-06	0.000102522	1	0.0573031	1	1	17.4511	0.0573031	1	1	0.000815661	1	region_6348	Tspear

## Sheet: GO Biological Process
# Ontology	ID	Desc	BinomRank	BinomP	BinomBonfP	BinomFdrQ	RegionFoldEnrich	ExpRegions	ObsRegions	GenomeFrac	SetCov	HyperRank	HyperP	HyperBonfP	HyperFdrQ	GeneFoldEnrich	ExpGenes	ObsGenes	TotalGenes	GeneSetCov	TermCov	Regions	Genes
GO Biological Process	GO:0006955	immune response	1	2.23569e-67	2.87465e-63	2.87465e-63	6.89347	20.164	139	0.00206725	0.0142506	1	9.41214e-18	1.21021e-13	1.21021e-13	2.27541	53.1773	121	928	0.0986949	0.130388	region_102,region_1088,region_11,region_1216,region_1259,region_1285,region_1314,region_1374,region_1380,region_1391,region_1512,region_1586,region_1614,region_1679,region_1766,region_1818,region_1859,region_1889,region_1907,region_203,region_2048,region_2090,region_2116,region_214,region_2190,region_2231,region_2354,region_2365,region_2603,region_2687,region_2697,region_2780,region_2824,region_2…	Adamts13,Adora3,Aif1,Apbb1ip,Apobec3,App,Blnk,Bmp6,C1qa,C1qb,C1qc,C1rb,C1rl,C1s2,Card9,Casp4,Ccl12,Ccl2,Ccl3,Ccl4,Ccl5,Cd14,Cd1d1,Cd244,Cd300a,Cd55,Cd74,Cd83,Cd86,Cldn1,Clec4a2,Ctsc,Cxcl10,Cxcl12,Cxcl16,Cxcl2,Cyba,Dab2ip,Defb29,Eda,Elf4,Erap1,F2rl1,Fcer1g,Fes,Ffar3,Fut7,Gbp3,Gm13277,Gm13278,Grap,H2-Ab1,H2-M3,H2-Q7,H2-T23,Hck,Hist1h2bf,Hist1h2bn,Hist1h2br,Icam1,Ifit2,Il12b,Il1a,Il1b,Il1rap,Il1rl2,…
GO Biological Process	GO:0002684	positive regulation of immune system process	2	1.83046e-47	2.3536e-43	1.1768e-43	5.73563	19.7014	113	0.00201983	0.011585	2	9.29315e-16	1.19491e-11	5.97457e-12	2.36341	41.8886	99	731	0.0807504	0.135431	region_1216,region_1278,region_1285,region_1294,region_1314,region_1380,region_1467,region_1512,region_1614,region_1818,region_1859,region_1889,region_1900,region_1907,region_203,region_2090,region_2116,region_2195,region_2231,region_2280,region_2537,region_2603,region_2687,region_2784,region_2824,region_3038,region_306,region_3084,region_3097,region_310,region_3112,region_330,region_3386,region_…	Adora3,Aif1,App,Bcl2a1d,C1qa,C1qb,C1qc,C1rb,C1rl,C1s2,C3ar1,Card9,Casp8,Ccl12,Ccl2,Ccl3,Ccl4,Ccl5,Cd14,Cd1d1,Cd244,Cd300a,Cd37,Cd55,Cd74,Cd83,Cd86,Chrnb2,Cmtm3,Cxcl10,Cxcl12,Cxcl2,Cyba,Dock8,Evi2b,F2rl1,Fam49b,Fcer1g,Fes,Ffar3,H2-M3,H2-T23,Hk1,Hlx,Hoxa5,Icam1,Igfbp2,Ikzf1,Il12b,Il1a,Il1b,Il1rl2,Il4ra,Irgm2,Itpkb,Lat2,Lgals9,Lta,Ly96,Lyn,Mb21d1,Mef2c,Myo1g,Nck2,Nckap1l,Nfatc2,Nlrc5,Nod1,Ocstamp,P2…
GO Biological Process	GO:0032101	regulation of response to external stimulus	3	2.40523e-47	3.09265e-43	1.03088e-43	6.77267	14.4699	98	0.00148349	0.0100472	3	1.01711e-14	1.3078e-10	4.35932e-11	2.39056	37.6481	90	657	0.0734095	0.136986	region_1088,region_1209,region_1216,region_1259,region_1325,region_1374,region_1474,region_158,region_1607,region_1608,region_1859,region_1889,region_1907,region_1922,region_1979,region_212,region_2231,region_2280,region_2327,region_2361,region_2365,region_2603,region_2687,region_2716,region_286,region_2927,region_2948,region_306,region_3097,region_3112,region_3137,region_3296,region_330,region_3…	A2m,Adora2a,Adora3,Aif1,Ajap1,Alox5ap,Apobec3,Artn,Bmp6,C3ar1,Casp4,Ccl12,Ccl2,Ccl3,Ccl4,Ccl5,Cd37,Cd55,Cd74,Cd9,Cdh13,Cxcl10,Cxcl12,Cxcl2,Cyba,Dtx3l,Epha4,F2r,F2rl1,Fam46a,Fcer1g,Ffar3,Grin1,Hgf,Il12b,Il1b,Il1rl2,Isl1,Jam3,Kdr,Ldlr,Lgals9,Lta,Ly86,Ly96,Lyn,Mb21d1,Met,Mgll,Mtus1,Nckap1l,Nfkb1,Nlrx1,Nod1,Nrp1,Parp9,Pdgfb,Pdgfra,Pik3ap1,Pik3cg,Pla2g5,Plau,Plek,Plxna4,Psmb4,Ptprf,Ptprj,Rgma,Ripor2,S…
GO Biological Process	GO:0045087	innate immune response	4	2.50944e-47	3.22664e-43	8.06659e-44	7.67448	11.5969	89	0.00118893	0.00912446	5	2.21534e-13	2.84849e-09	5.69698e-10	2.4744	30.7145	76	536	0.0619902	0.141791	region_102,region_11,region_1216,region_1259,region_1314,region_1374,region_1380,region_1391,region_1512,region_1614,region_1679,region_1859,region_1889,region_1907,region_203,region_2048,region_2116,region_2354,region_2365,region_2603,region_2697,region_2780,region_3038,region_306,region_3084,region_3386,region_341,region_3508,region_3575,region_373,region_3733,region_3736,region_375,region_379,…	Adamts13,Aif1,Apobec3,C1qa,C1qb,C1qc,C1rb,C1rl,C1s2,Card9,Casp4,Ccl12,Ccl2,Ccl3,Ccl4,Ccl5,Cd14,Cd1d1,Cd244,Cd55,Cd86,Cldn1,Clec4a2,Cxcl16,Cyba,Dab2ip,Defb29,Elf4,F2rl1,Fcer1g,Fes,Gbp3,Gm13277,Gm13278,Grap,H2-Q7,Hck,Hist1h2bf,Hist1h2bn,Hist1h2br,Icam1,Ifit2,Il12b,Il1rap,Il1rl2,Irf5,Irgm2,Ly86,Ly96,Lyn,Mb21d1,Nfkb1,Nlrc5,Nlrp1a,Nlrx1,Nod1,Oasl1,Pik3cd,Pik3cg,Serping1,Slc11a1,Snca,Stx11,Tbkbp1,Ticam…
GO Biological Process	GO:0001934	positive regulation of protein phosphorylation	5	3.75639e-46	4.82996e-42	9.65993e-43	5.66402	19.5974	111	0.00200916	0.0113799	27	4.36851e-10	5.61703e-06	2.08038e-07	1.91084	51.2863	98	895	0.0799347	0.109497	region_102,region_1022,region_1073,region_1135,region_1216,region_1294,region_1314,region_133,region_158,region_1614,region_1685,region_181,region_1859,region_1889,region_1907,region_1985,region_2057,region_2327,region_2361,region_2424,region_2478,region_2592,region_2603,region_2687,region_2716,region_286,region_2910,region_2916,region_3266,region_330,region_3386,region_34,region_3463,region_3469…	Ackr3,Agap2,Agtr1a,Aif1,App,Bmp6,Camk1,Card9,Ccl12,Ccl2,Ccl3,Ccl4,Ccl5,Cd74,Cemip,Dab2ip,Dusp15,Epha4,Erbb2,Erbb3,F2r,F2rl1,Fgfr3,Fzd1,Fzd8,Gata4,Gdf7,Ghr,Gm13277,Gm13278,Gnai2,Grm4,Hcrtr1,Hgf,Icam1,Igfbp4,Il12b,Il1b,Inhbb,Irgm2,Isl1,Kdr,Lgals9,Lrrk1,Lrrk2,Ltbr,Lyn,Map3k20,Mapk8ip1,Mdfic,Met,Ncf1,Nckap1l,Nod1,Npnt,Nrp1,Ntrk1,Ntrk2,Osm,P2rx7,Parp9,Pde5a,Pdgfb,Pdgfra,Pik3cg,Pla2g5,Plaur,Plpp3,Prkag…
GO Biological Process	GO:0042327	positive regulation of phosphorylation	6	9.26482e-46	1.19127e-41	1.98545e-42	5.49934	20.5479	113	0.00210661	0.011585	35	2.53822e-09	3.26365e-05	9.32471e-07	1.84185	53.7503	99	938	0.0807504	0.105544	region_102,region_1022,region_1073,region_1135,region_1216,region_1294,region_1314,region_133,region_158,region_1614,region_1685,region_181,region_1859,region_1889,region_1907,region_1985,region_2057,region_2327,region_2361,region_2424,region_2478,region_2592,region_2603,region_2687,region_2716,region_286,region_2910,region_2916,region_3266,region_330,region_3386,region_34,region_3463,region_3469…	Ackr3,Agap2,Agtr1a,Aif1,App,Bmp6,Camk1,Card9,Ccl12,Ccl2,Ccl3,Ccl4,Ccl5,Cd74,Cemip,Dab2ip,Dusp15,Eef1a2,Epha4,Erbb2,Erbb3,F2r,F2rl1,Fgfr3,Fzd1,Fzd8,Gata4,Gdf7,Ghr,Gm13277,Gm13278,Gnai2,Grm4,Hcrtr1,Hgf,Icam1,Igfbp4,Il12b,Il1b,Inhbb,Irgm2,Isl1,Kdr,Lgals9,Lrrk1,Lrrk2,Ltbr,Lyn,Map3k20,Mapk8ip1,Mdfic,Met,Ncf1,Nckap1l,Nod1,Npnt,Nrp1,Ntrk1,Ntrk2,Osm,P2rx7,Parp9,Pde5a,Pdgfb,Pdgfra,Pik3cg,Pla2g5,Plaur,Plpp…
GO Biological Process	GO:1902533	positive regulation of intracellular signal transduction	7	3.3356e-43	4.28891e-39	6.12702e-40	5.46847	19.5667	107	0.00200602	0.0109699	41	5.34197e-09	6.8687e-05	1.67529e-06	1.84938	50.8279	94	887	0.0766721	0.105975	region_1022,region_1073,region_1135,region_1180,region_1216,region_1294,region_1314,region_133,region_158,region_1614,region_1685,region_181,region_1859,region_1889,region_1907,region_203,region_2046,region_2057,region_2190,region_2217,region_2327,region_2361,region_2478,region_2537,region_2592,region_2603,region_2687,region_2716,region_2910,region_2916,region_2927,region_330,region_341,region_34…	Ackr3,Adora3,Adrb1,Agap2,Agtr1a,App,Card9,Casp8,Ccl12,Ccl2,Ccl3,Ccl4,Ccl5,Cd14,Cd74,Cdh13,Cxcl10,Dab2ip,Dusp15,Eda,Epha4,Erbb2,Erbb3,F2r,F2rl1,Fgfr3,Flna,Fzd8,Gata4,Gnai2,Grm4,Hcrtr1,Hgf,Icam1,Igfbp4,Il12b,Il1b,Il20ra,Isl1,Itpkb,Kdr,Lamtor5,Lims1,Lrrk1,Lrrk2,Ltbr,Lyn,Map3k20,Mapk8ip1,Mdfic,Met,Ncf1,Nck2,Nod1,Npnt,Nrp1,Ntrk1,Ntrk2,Osm,P2rx7,Parp9,Pde5a,Pdgfb,Pdgfra,Pik3ap1,Pik3cg,Pla2g5,Prkcb,Prr5…
GO Biological Process	GO:0050776	regulation of immune response	8	5.2683e-43	6.77398e-39	8.46747e-40	6.64942	13.535	90	0.00138764	0.00922698	8	2.24609e-12	2.88802e-08	3.61002e-09	2.29098	35.356	81	617	0.0660685	0.13128	region_1216,region_1259,region_1285,region_1294,region_1380,region_1586,region_1818,region_1859,region_1889,region_1900,region_1922,region_203,region_2090,region_2116,region_214,region_2280,region_2354,region_2733,region_2948,region_3038,region_306,region_3084,region_3097,region_310,region_330,region_3386,region_3393,region_341,region_3508,region_3611,region_3736,region_3769,region_379,region_379…	A2m,Adora3,Bcl2a1d,Birc3,C1qa,C1qb,C1qc,C1rb,C1rl,C1s2,C3ar1,Card9,Cd14,Cd1d1,Cd300a,Cd37,Cd55,Cd74,Cd86,Cmtm3,Cyba,Dab2ip,F2rl1,Fam49b,Fcer1g,Fes,Ffar3,H2-M3,H2-T23,Hk1,Hlx,Il12b,Il4ra,Irf4,Irgm2,Klrb1b,Lat2,Lgals9,Loxl3,Lta,Ly96,Lyn,Mb21d1,Mef2c,Myo1f,Myo1g,Nckap1l,Nfatc2,Nlrc5,Nlrx1,P2rx7,Parp9,Pik3ap1,Plcg2,Prkcb,Psmb4,Ptprc,Ptprj,Rftn1,Serping1,Slamf8,Slc11a1,Stat5a,Susd4,Tgfb2,Ticam2,Tlr2,T…
GO Biological Process	GO:0048870	cell motility	9	3.3417e-42	4.29675e-38	4.77417e-39	5.03062	22.4625	113	0.0023029	0.011585	6	2.63932e-13	3.39363e-09	5.65606e-10	2.11528	49.1661	104	858	0.0848287	0.121212	region_1035,region_1088,region_1278,region_1279,region_1306,region_1314,region_1375,region_1474,region_1512,region_158,region_1614,region_1637,region_1647,region_1679,region_1907,region_1979,region_2057,region_214,region_217,region_2231,region_2242,region_2319,region_2361,region_2433,region_2437,region_2509,region_2522,region_2603,region_2609,region_2687,region_2847,region_293,region_3265,region_…	Adam3,Add2,Agtr1a,Apela,Arhgef16,Artn,Barhl1,Catsper4,Ccl12,Ccl2,Ccl3,Ccl4,Ccl5,Cd151,Cdh13,Celf3,Cfap44,Cxcl10,Cxcl12,Cxcl16,Cxcl2,Dab2ip,Dbh,Dcc,Dcdc2a,Disc1,Dock8,Emx2,Epha2,Epha3,Epha4,Ephb1,F2rl1,Fcer1g,Fes,Fezf1,Flna,Fmnl1,Foxe1,Fut7,Fut8,Gpc6,Grap,Hck,Hgf,Hoxa5,Icam1,Il12b,Il1b,Isl1,Jam3,Kdr,Lrp5,Lrrc6,Lrrk2,Mark1,Mef2c,Megf10,Mesp1,Met,Msn,Myo1g,Nav1,Nck2,Nckap1l,Ndnf,Neurog2,Nfatc2,Nkx6-…
GO Biological Process	GO:0016477	cell migration	10	1.69604e-41	2.18077e-37	2.18077e-38	5.28029	20.0747	106	0.0020581	0.0108673	4	2.91056e-14	3.74239e-10	9.35599e-11	2.26304	42.8627	97	748	0.0791191	0.129679	region_1035,region_1088,region_1278,region_1279,region_1306,region_1314,region_1375,region_1474,region_1512,region_158,region_1614,region_1637,region_1679,region_1907,region_1979,region_2057,region_214,region_217,region_2231,region_2242,region_2319,region_2361,region_2437,region_2509,region_2522,region_2603,region_2609,region_2687,region_2847,region_293,region_3265,region_329,region_3393,region_3…	Add2,Agtr1a,Apela,Arhgef16,Artn,Barhl1,Ccl12,Ccl2,Ccl3,Ccl4,Ccl5,Cd151,Cdh13,Cxcl10,Cxcl12,Cxcl16,Cxcl2,Dab2ip,Dbh,Dcc,Dcdc2a,Disc1,Dock8,Emx2,Epha2,Epha3,Epha4,Ephb1,F2rl1,Fcer1g,Fes,Fezf1,Flna,Fmnl1,Foxe1,Fut7,Fut8,Gpc6,Grap,Hck,Hgf,Hoxa5,Icam1,Il12b,Il1b,Isl1,Jam3,Kdr,Lrp5,Lrrk2,Mark1,Mef2c,Megf10,Mesp1,Met,Msn,Myo1g,Nav1,Nck2,Nckap1l,Ndnf,Neurog2,Nfatc2,Nkx6-1,Nr2e1,Nr2f1,Nr4a2,Nrp1,Nrp2,Ntrk…
GO Biological Process	GO:0043207	response to external biotic stimulus	11	1.40491e-40	1.80644e-36	1.64222e-37	5.6058	17.4819	98	0.00179228	0.0100472	63	3.7003e-08	0.000475785	7.55214e-06	1.84037	46.1863	85	806	0.0693312	0.105459	region_102,region_11,region_1216,region_1294,region_1314,region_1347,region_1374,region_138,region_1512,region_1586,region_1614,region_1679,region_1818,region_1859,region_1889,region_1907,region_203,region_2116,region_2138,region_2354,region_2603,region_2687,region_2697,region_2716,region_2743,region_2780,region_310,region_3329,region_3386,region_341,region_3508,region_3575,region_3611,region_373…	Abcb4,Adamts13,Apobec3,Card9,Ccl12,Ccl2,Ccl3,Ccl5,Cd14,Cd37,Cd86,Cldn1,Cnp,Comt,Cxcl10,Cxcl16,Cxcl2,Dab2ip,Defb29,Epha2,F2r,F2rl1,Fcer1g,Gbp3,Gjb2,Gm13277,Gm13278,H2-M3,H2-T23,Hck,Hist1h2bf,Hist1h2bn,Hist1h2br,Icam1,Ifit2,Il10ra,Il10rb,Il12b,Il1b,Il4ra,Irf4,Irf5,Irgm2,Kcnj8,Krt8,Lalba,Lgals9,Lta,Ltbr,Ly96,Lyn,Lypd8,Mb21d1,Mef2c,Myo1f,Ncf1,Nfkb1,Nlrc5,Nlrp1a,Nod1,Oasl1,P2rx7,Pik3cd,Plcg2,Ptprc,Ren…
GO Biological Process	GO:0051707	response to other organism	12	5.3064e-40	6.82297e-36	5.68581e-37	5.5768	17.3935	97	0.00178322	0.00994464	68	6.04169e-08	0.000776841	1.14241e-05	1.82779	45.9571	84	802	0.0685155	0.104738	region_102,region_11,region_1216,region_1294,region_1314,region_1347,region_1374,region_138,region_1512,region_1586,region_1614,region_1679,region_1818,region_1859,region_1889,region_1907,region_203,region_2116,region_2138,region_2354,region_2603,region_2687,region_2697,region_2716,region_2743,region_2780,region_310,region_3329,region_3386,region_341,region_3508,region_3575,region_3611,region_373…	Adamts13,Apobec3,Card9,Ccl12,Ccl2,Ccl3,Ccl5,Cd14,Cd37,Cd86,Cldn1,Cnp,Comt,Cxcl10,Cxcl16,Cxcl2,Dab2ip,Defb29,Epha2,F2r,F2rl1,Fcer1g,Gbp3,Gjb2,Gm13277,Gm13278,H2-M3,H2-T23,Hck,Hist1h2bf,Hist1h2bn,Hist1h2br,Icam1,Ifit2,Il10ra,Il10rb,Il12b,Il1b,Il4ra,Irf4,Irf5,Irgm2,Kcnj8,Krt8,Lalba,Lgals9,Lta,Ltbr,Ly96,Lyn,Lypd8,Mb21d1,Mef2c,Myo1f,Ncf1,Nfkb1,Nlrc5,Nlrp1a,Nod1,Oasl1,P2rx7,Pik3cd,Plcg2,Ptprc,Ren1,Slam…
GO Biological Process	GO:0009607	response to biotic stimulus	13	1.04624e-39	1.34525e-35	1.03481e-36	5.40811	18.3058	99	0.00187675	0.0101497	85	1.49294e-07	0.00191962	2.25837e-05	1.77608	48.4211	86	845	0.0701468	0.101775	region_102,region_11,region_1216,region_1294,region_1314,region_1347,region_1374,region_138,region_1512,region_1586,region_1614,region_1679,region_1818,region_1859,region_1889,region_1907,region_203,region_2116,region_2138,region_2354,region_2603,region_2687,region_2697,region_2716,region_2743,region_2780,region_310,region_3329,region_3386,region_341,region_3508,region_3541,region_3575,region_361…	Abcb4,Adamts13,Apobec3,Card9,Ccl12,Ccl2,Ccl3,Ccl5,Cd14,Cd37,Cd86,Cldn1,Cnp,Comt,Cxcl10,Cxcl16,Cxcl2,Dab2ip,Defb29,Epha2,F2r,F2rl1,Fcer1g,Gbp3,Gjb2,Gm13277,Gm13278,H2-M3,H2-T23,Hck,Hist1h2bf,Hist1h2bn,Hist1h2br,Icam1,Ifit2,Il10ra,Il10rb,Il12b,Il1b,Il4ra,Irf4,Irf5,Irgm2,Kcnj8,Krt8,Lalba,Lgals9,Lta,Ltbr,Ly96,Lyn,Lypd8,Mb21d1,Mef2c,Myo1f,Ncf1,Nfkb1,Nlrc5,Nlrp1a,Nod1,Oasl1,P2rx7,Pik3cd,Plcg2,Ptprc,Ren…
GO Biological Process	GO:0022603	regulation of anatomical structure morphogenesis	14	1.09734e-39	1.41096e-35	1.00783e-36	4.59961	25.2195	116	0.00258556	0.0118926	23	3.18481e-10	4.09502e-06	1.78044e-07	1.90722	52.4323	100	915	0.0815661	0.10929	region_1035,region_1075,region_1147,region_1209,region_1285,region_1314,region_1375,region_1467,region_158,region_1607,region_1614,region_1685,region_17,region_1901,region_1907,region_192,region_2057,region_2090,region_2188,region_2217,region_2231,region_2242,region_2280,region_236,region_2509,region_2603,region_2687,region_269,region_2824,region_286,region_293,region_3112,region_3116,region_3122…	Adamts1,Agtr1a,Ajap1,Apela,Arhgap18,Arhgap44,Bhlhe23,C3ar1,Cacna1a,Camk1,Ccl12,Ccl2,Ccl3,Chrnb2,Cnmd,Cxcl10,Cxcl12,Dab2ip,Ddah1,Disc1,Dmrt3,Ehd2,Epha2,Epha4,Erap1,Fes,Flna,Fmnl1,Fstl4,Fzd1,Fzd2,Gal,Gata4,Gdf7,Golga4,Grin1,Hck,Hgf,Hhex,Hoxa5,Hoxd11,Hoxd13,Hpn,Htatip2,Icam1,Il1a,Il1b,Il4ra,Inf2,Isl1,Kdr,Lims1,Lrrk2,Mef2c,Mesp1,Met,Mgll,Msn,Myc,Nfatc2,Nfatc4,Nfib,Nkx6-1,Notch4,Nr2e1,Nrp1,Ntrk1,Ntrk2…
GO Biological Process	GO:0043408	regulation of MAPK cascade	15	1.49994e-39	1.92863e-35	1.28575e-36	6.06724	14.6689	89	0.00150389	0.00912446	32	1.42826e-09	1.83645e-05	5.73892e-07	2.04382	38.1639	78	666	0.0636215	0.117117	region_1073,region_1135,region_1180,region_1216,region_1294,region_1314,region_133,region_1464,region_158,region_1614,region_1685,region_181,region_1859,region_1889,region_1907,region_2057,region_2327,region_2361,region_2467,region_2478,region_2592,region_2603,region_2687,region_2716,region_2910,region_2916,region_3440,region_3469,region_3523,region_373,region_3736,region_3778,region_379,region_3…	Ackr3,App,Bmp6,Card9,Ccl12,Ccl2,Ccl3,Ccl4,Ccl5,Cd300a,Cd74,Dab2ip,Dusp15,Dusp16,Dusp2,Epha2,Epha4,Ephb1,Erbb2,F2r,F2rl1,Fgfr3,Fzd8,Gata4,Gdf7,Gm14698,Gnai2,Grm4,Hcrtr1,Hgf,Icam1,Igfbp4,Il1b,Inhbb,Kdr,Lrrk2,Ltbr,Lyn,Map3k20,Mapk8ip1,Mdfic,Met,Ncf1,Ndrg2,Nod1,Npnt,Nrp1,Ntrk1,Ntrk2,Osm,P2rx7,Pde5a,Pdgfb,Pdgfra,Pik3cg,Pla2g5,Ptprc,Ptprj,Ptprr,Rassf2,Ren1,Sash1,Spred2,St5,Tgfa,Tgfb2,Timp3,Tlr2,Tlr4,Tl…
GO Biological Process	GO:0001817	regulation of cytokine production	16	3.07752e-39	3.95707e-35	2.47317e-36	6.53069	12.7092	83	0.00130298	0.00850933	25	3.94219e-10	5.06887e-06	2.02755e-07	2.1776	33.0639	72	577	0.0587276	0.124783	region_1147,region_1216,region_1259,region_1294,region_1374,region_1818,region_1859,region_1889,region_1900,region_1907,region_203,region_2048,region_2116,region_214,region_2280,region_2354,region_2687,region_2716,region_279,region_2824,region_2884,region_306,region_3097,region_310,region_341,region_3469,region_3508,region_3736,region_375,region_379,region_3936,region_4031,region_4086,region_4169…	Agpat2,Agtr1a,C3ar1,Card9,Casp4,Ccl2,Ccl3,Ccl5,Cd14,Cd1d1,Cd244,Cd300c2,Cd74,Cd83,Cyba,Epha2,F11r,F2r,F2rl1,Fam49b,Fcer1g,Ffar3,Gata4,H2-M3,H2-T23,Hgf,Hk1,Il12b,Il1a,Il1b,Il1rap,Il1rl2,Il4ra,Inhbb,Irf4,Isl1,Lgals9,Lta,Ly96,Lyn,Mb21d1,Mertk,Met,Nckap1l,Ndrg2,Nfatc4,Nfkb1,Nlrp1a,Nlrx1,Nod1,P2rx7,Plcg2,Sigirr,Slc11a1,Stat5a,Sulf2,Tgfb2,Ticam2,Tlr2,Tlr4,Tlr6,Tlr9,Tnf,Tnfrsf21,Tnfrsf9,Tnfsf9,Trim30a,T…
GO Biological Process	GO:0031347	regulation of defense response	17	4.39843e-39	5.6555e-35	3.32676e-36	6.90995	11.4328	79	0.00117211	0.00809924	15	2.31956e-11	2.98249e-07	1.98833e-08	2.34918	29.7976	70	520	0.0570963	0.134615	region_1216,region_1259,region_1374,region_1586,region_1818,region_1859,region_1889,region_1907,region_1922,region_203,region_2116,region_212,region_2327,region_2354,region_2687,region_2927,region_2948,region_306,region_3097,region_310,region_3296,region_330,region_3386,region_3393,region_341,region_3508,region_3575,region_3611,region_3736,region_375,region_3769,region_379,region_3835,region_3936…	A2m,Adora2a,Adora3,Alox5ap,Apobec3,Birc3,Card9,Casp4,Ccl3,Ccl5,Cd14,Cd300a,Cd37,Cd55,Cd74,Cd86,Cyba,Dab2ip,Dtx3l,F2rl1,Fcer1g,Ffar3,H2-M3,H2-T23,Hgf,Il12b,Il1b,Il1rl2,Irf4,Irgm2,Isl1,Klrb1b,Ldlr,Lgals9,Lta,Ly96,Lyn,Mb21d1,Mef2c,Mgll,Myo1f,Nfkb1,Nlrc5,Nlrx1,Nod1,Parp9,Pik3ap1,Pik3cg,Pla2g5,Psmb4,Rftn1,Serping1,Slamf8,Snca,Stat5a,Susd4,Ticam2,Tlr2,Tlr4,Tlr6,Tlr9,Tnf,Tnfrsf11a,Traf3ip2,Trim12c,Trim3…
GO Biological Process	GO:0034097	response to cytokine	18	9.96722e-38	1.28159e-33	7.11992e-35	5.46161	17.028	93	0.00174574	0.00953455	51	1.179e-08	0.000151596	2.97247e-06	1.8872	45.0402	85	786	0.0693312	0.108143	region_102,region_1030,region_1101,region_1278,region_1308,region_1314,region_1347,region_1374,region_1576,region_1614,region_1679,region_1765,region_1907,region_203,region_2046,region_2048,region_2138,region_2190,region_2217,region_2231,region_2242,region_2326,region_2547,region_2603,region_2687,region_2697,region_2824,region_2870,region_306,region_3097,region_3112,region_3266,region_3386,region…	Ackr3,Adamts13,Adamts7,Aif1,Aldh1a2,B3gnt2,Birc3,Casp8,Ccl12,Ccl2,Ccl3,Ccl4,Ccl5,Ccrl2,Cd14,Cd74,Cd86,Cldn1,Cntfr,Cxcl10,Cxcl12,Cxcl16,Cxcl2,Cyba,Dab2ip,Dock8,Eda,Egln3,Elavl2,Gbp3,Ghr,Gldc,Gm13277,Gm13278,Gm13305,Gm21973,Grem2,H2-Q7,Icam1,Ifit2,Igtp,Il10ra,Il10rb,Il12b,Il1a,Il1b,Il1rap,Il1rl2,Il20ra,Il21r,Il4ra,Ina,Irf5,Irgm2,Krt8,Laptm5,Lims1,Lrch1,Lrrc15,Lrrc4,Ltbr,Myc,Nfkb1,Nkx6-1,Npnt,Nrp2,O…
GO Biological Process	GO:0051345	positive regulation of hydrolase activity	19	1.31702e-36	1.69342e-32	8.91274e-34	5.8278	14.5853	85	0.00149531	0.00871437	34	2.32574e-09	2.99043e-05	8.79539e-07	2.03288	37.8773	77	661	0.0628059	0.11649	region_1073,region_1135,region_1278,region_1308,region_1314,region_1577,region_158,region_1608,region_1614,region_1685,region_1793,region_1907,region_1919,region_2188,region_2209,region_2217,region_2308,region_2327,region_2361,region_2516,region_2547,region_2603,region_2651,region_269,region_2712,region_2716,region_286,region_3151,region_3167,region_3197,region_3370,region_341,region_3611,region_…	Adrb1,Agap2,Agtr1a,Antxr1,App,Arhgap18,Arhgap20,Arhgap23,Arhgap25,Arhgap30,Arhgap44,Arhgap45,Arhgdig,Arhgef16,Arhgef19,Asap1,Asap2,Casp8,Ccl12,Ccl2,Ccl3,Ccl4,Ccl5,Cd300a,Chn2,Dab2ip,Depdc1a,Dock8,Egln3,Epha2,Epha4,Erbb2,F11r,F2r,F2rl1,Fgfr3,Foxl2,Gmip,Icam1,Lims1,Lrrk2,Lyn,Mef2c,Myc,Nckap1l,Nlrp1a,Nod1,Npnt,Nrp1,Ntrk1,Ophn1,Pcolce,Pdgfra,Perp,Pla2g5,Plek,Psme1,Rapgef3,Rasal1,Ret,Rgma,Rgs1,Rgs11,R…
GO Biological Process	GO:0050778	positive regulation of immune response	20	1.5257e-36	1.96175e-32	9.80873e-34	7.82585	8.56137	67	0.000877729	0.00686898	13	9.65291e-12	1.24117e-07	9.54747e-09	2.62656	22.4628	59	392	0.048124	0.15051	region_1216,region_1285,region_1294,region_1380,region_1818,region_1859,region_1889,region_1900,region_203,region_2090,region_2116,region_2280,region_3038,region_3084,region_3097,region_310,region_330,region_3386,region_3508,region_3611,region_3736,region_379,region_3796,region_3936,region_4031,region_4086,region_4169,region_4178,region_4191,region_4244,region_4316,region_4322,region_457,region_4…	Adora3,Bcl2a1d,C1qa,C1qb,C1qc,C1rb,C1rl,C1s2,C3ar1,Card9,Cd14,Cd1d1,Cd55,Cd74,Cd86,F2rl1,Fam49b,Fcer1g,Ffar3,H2-M3,H2-T23,Hk1,Hlx,Il12b,Il4ra,Irgm2,Lat2,Lgals9,Lta,Ly96,Lyn,Mb21d1,Mef2c,Myo1g,Nckap1l,Nfatc2,Nlrc5,P2rx7,Parp9,Pik3ap1,Plcg2,Prkcb,Ptprc,Rftn1,Serping1,Slc11a1,Stat5a,Tgfb2,Ticam2,Tlr2,Tlr4,Tlr6,Tlr9,Tnf,Tnfrsf21,Tnfsf13b,Trim12c,Unc93b1,Zbp1
GO Biological Process	GO:0001775	cell activation	21	4.50559e-36	5.79328e-32	2.75871e-33	5.51104	15.968	88	0.00163707	0.00902194	7	4.36306e-13	5.61003e-09	8.01433e-10	2.40917	32.3763	78	565	0.0636215	0.138053	region_102,region_1216,region_1278,region_1294,region_1314,region_1391,region_1467,region_1512,region_1547,region_1586,region_1608,region_1614,region_1685,region_1818,region_1859,region_1889,region_1907,region_210,region_217,region_2231,region_2361,region_2537,region_2716,region_279,region_2910,region_3097,region_310,region_313,region_3193,region_3296,region_3393,region_3611,region_37,region_373,…	Adora2a,Adora3,Aif1,Apbb1ip,App,Bcl2a1d,Blnk,Ccl3,Ccl5,Cd151,Cd1d1,Cd244,Cd300a,Cd74,Cd86,Chrnb2,Cxcl10,Cxcl12,Dock8,Elf4,Ephb1,F2r,F2rl1,Fcer1g,Fermt3,Flna,Fut7,Fzd8,Gm13277,Gm13278,H2-M3,H2-T23,Hhex,Icam1,Ikzf1,Ikzf3,Il12b,Irf4,Itpkb,Lat2,Ltbr,Lyl1,Lyn,Mef2c,Megf10,Mertk,Msn,Myo1f,Nck2,Nfatc1,Ntrk1,P2rx7,P2ry12,Pdgfra,Pik3cd,Pik3cg,Plcg2,Plek,Prkcb,Ptprc,Shh,Slc11a1,Snca,Spi1,Stat5a,Stx11,Tac4,…
GO Biological Process	GO:0071345	cellular response to cytokine stimulus	22	6.32481e-36	8.13245e-32	3.69657e-33	5.77602	14.5429	84	0.00149096	0.00861185	48	9.5086e-09	0.000122262	2.54712e-06	1.97952	38.3931	76	670	0.0619902	0.113433	region_102,region_1030,region_1278,region_1308,region_1314,region_1347,region_1374,region_1576,region_1614,region_1765,region_1907,region_2046,region_2048,region_2138,region_2190,region_2217,region_2231,region_2242,region_2326,region_2547,region_2603,region_2687,region_2697,region_2824,region_2870,region_306,region_3097,region_3112,region_3266,region_3386,region_3463,region_3523,region_370,region…	Ackr3,Adamts13,Adamts7,Aif1,B3gnt2,Birc3,Ccl12,Ccl2,Ccl3,Ccl4,Ccl5,Ccrl2,Cd74,Cd86,Cldn1,Cntfr,Cxcl10,Cxcl12,Cxcl2,Cyba,Dab2ip,Dock8,Eda,Egln3,Elavl2,Gbp3,Ghr,Gldc,Gm13277,Gm13278,Gm13305,Gm21973,Grem2,H2-Q7,Icam1,Ifit2,Igtp,Il10ra,Il10rb,Il12b,Il1a,Il1b,Il1rap,Il1rl2,Il20ra,Il21r,Il4ra,Ina,Irf5,Krt8,Laptm5,Lims1,Lrch1,Lrrc15,Lrrc4,Ltbr,Myc,Nfkb1,Nkx6-1,Npnt,Nrp2,Ocln,Ocstamp,Osm,Pax6,Pcolce,Pdgf…
GO Biological Process	GO:0043410	positive regulation of MAPK cascade	23	8.35741e-36	1.0746e-31	4.67216e-33	7.04362	10.08	71	0.00103343	0.00727907	29	6.40147e-10	8.23101e-06	2.83828e-07	2.32935	26.1875	61	457	0.0497553	0.133479	region_1073,region_1135,region_1216,region_1294,region_1314,region_133,region_158,region_1614,region_1685,region_181,region_1859,region_1889,region_1907,region_2057,region_2327,region_2361,region_2478,region_2592,region_2603,region_2687,region_2716,region_2910,region_2916,region_3469,region_3523,region_373,region_3736,region_3778,region_379,region_4191,region_4199,region_4248,region_4316,region_4…	Ackr3,App,Card9,Ccl12,Ccl2,Ccl3,Ccl4,Ccl5,Cd74,Dab2ip,Dusp15,Epha4,Erbb2,F2r,F2rl1,Fgfr3,Fzd8,Gata4,Gnai2,Grm4,Hcrtr1,Hgf,Icam1,Igfbp4,Il1b,Kdr,Lrrk2,Ltbr,Map3k20,Mapk8ip1,Mdfic,Met,Ncf1,Nod1,Npnt,Nrp1,Ntrk1,Ntrk2,Osm,P2rx7,Pde5a,Pdgfb,Pdgfra,Pik3cg,Pla2g5,Ptprc,Rassf2,Sash1,St5,Tgfa,Tgfb2,Tlr2,Tlr4,Tlr6,Tlr9,Tnf,Tnfrsf11a,Tnik,Tpd52l1,Trf,Wnt7a
GO Biological Process	GO:0040012	regulation of locomotion	24	1.83755e-35	2.36272e-31	9.84467e-33	4.648	21.9449	102	0.00224984	0.0104572	31	8.23791e-10	1.05923e-05	3.41687e-07	1.93433	47.5616	92	830	0.0750408	0.110843	region_1022,region_1069,region_1088,region_1209,region_1216,region_1276,region_1278,region_1314,region_1325,region_1474,region_1512,region_1576,region_158,region_1586,region_1607,region_1614,region_1679,region_1907,region_1979,region_1985,region_2231,region_2242,region_2280,region_2361,region_2603,region_2687,region_2716,region_2824,region_293,region_3097,region_3112,region_3265,region_329,region…	Ackr3,Adora2a,Adora3,Aif1,App,Arhgap18,Artn,Bex4,C3ar1,Ccl12,Ccl2,Ccl3,Ccl4,Ccl5,Cd300a,Cd74,Cdh13,Cemip,Chrm1,Cxcl10,Cxcl12,Cxcl16,Cxcl2,Dab2ip,Dock8,Epha2,Epha3,F2r,F2rl1,Fermt3,Fes,Flna,Hgf,Icam1,Il1a,Il1b,Jam3,Kdr,Lama1,Lgals9,Lmna,Lrch1,Lrrc15,Lrrk2,Lyn,Macf1,Mcam,Met,Msn,Mtus1,Myo1f,Nckap1l,Nkx6-1,Nr2e1,Nrp1,P2ry12,P2ry6,Pax6,Pdgfb,Pdgfra,Pik3cd,Plau,Plpp3,Plxna4,Prox1,Prr5l,Ptprc,Ptprg,Ptp…
GO Biological Process	GO:0002252	immune effector process	25	3.36223e-35	4.32315e-31	1.72926e-32	7.42225	9.02692	67	0.000925458	0.00686898	17	4.27584e-11	5.49788e-07	3.23405e-08	2.51094	23.8954	60	417	0.0489396	0.143885	region_102,region_1314,region_1347,region_1380,region_1391,region_1586,region_1614,region_1766,region_1818,region_1859,region_1907,region_2116,region_2354,region_2697,region_3038,region_3084,region_3193,region_341,region_3508,region_3575,region_373,region_3733,region_3736,region_379,region_3796,region_3936,region_4031,region_4178,region_4316,region_4322,region_4504,region_4548,region_457,region_4…	Adora3,Apbb1ip,Apobec3,App,C1qa,C1qb,C1qc,C1rb,C1rl,C1s2,Card9,Ccl3,Cd244,Cd300a,Cd55,Cd74,Cd86,Ctsc,Cxcl10,Dbh,F2rl1,Fcer1g,Fut7,Gm13277,Gm13278,H2-Ab1,H2-M3,Icam1,Ifit2,Il10rb,Il12b,Il4ra,Irf4,Irf5,Kcnj8,Lat2,Lyn,Mb21d1,Myo1f,Myo1g,Ncf1,Nlrc5,Oasl1,Plcg2,Ptprc,Rftn1,Serping1,Slc11a1,Stx11,Tac4,Tagap,Ticam2,Tlr4,Tlr9,Trim12c,Trim30a,Tyrobp,Unc93b1,Zbp1,Zc3hav1
GO Biological Process	GO:0001819	positive regulation of cytokine production	26	3.72431e-35	4.78872e-31	1.84182e-32	7.88172	8.12005	64	0.000832485	0.00656141	18	6.44792e-11	8.29073e-07	4.60596e-08	2.60818	21.0875	55	368	0.0448613	0.149456	region_1147,region_1216,region_1294,region_1818,region_1859,region_1889,region_1900,region_1907,region_203,region_2048,region_2116,region_2280,region_2687,region_2716,region_2824,region_2884,region_306,region_3097,region_310,region_341,region_3469,region_3508,region_3736,region_379,region_3936,region_4086,region_4169,region_4178,region_4191,region_4316,region_4677,region_470,region_5067,region_50…	Agpat2,Agtr1a,C3ar1,Card9,Casp4,Ccl2,Ccl3,Ccl5,Cd14,Cd1d1,Cd244,Cd300c2,Cd74,Cd83,Cyba,F2r,F2rl1,Fam49b,Fcer1g,Ffar3,Gata4,H2-M3,H2-T23,Hgf,Hk1,Il12b,Il1a,Il1b,Il1rap,Il1rl2,Il4ra,Irf4,Isl1,Lgals9,Lta,Ly96,Mb21d1,Nfatc4,Nlrp1a,Nod1,P2rx7,Plcg2,Slc11a1,Stat5a,Sulf2,Ticam2,Tlr2,Tlr4,Tlr6,Tlr9,Tnf,Tnfsf9,Unc93b1,Zbtb20,Zc3hav1
GO Biological Process	GO:0030155	regulation of cell adhesion	27	1.38735e-34	1.78385e-30	6.60685e-32	5.13236	17.5358	90	0.0017978	0.00922698	16	3.92498e-11	5.04675e-07	3.15422e-08	2.19179	36.0437	79	629	0.0644372	0.125596	region_1073,region_1278,region_1285,region_1314,region_1397,region_1400,region_158,region_1586,region_1614,region_1818,region_1979,region_1985,region_2090,region_2195,region_2217,region_2231,region_2397,region_2537,region_2687,region_2733,region_3097,region_310,region_3112,region_3193,region_3265,region_3296,region_3359,region_3456,region_37,region_373,region_3806,region_3870,region_3893,region_4…	Adora2a,Aif1,Ajap1,Apbb1ip,Ccl2,Ccl5,Cd1d1,Cd244,Cd300a,Cd74,Cd83,Cd86,Cd9,Cdh13,Cxcl12,Dact2,Disc1,Dock8,Duxbl1,Duxbl2,Duxbl3,Epha2,Epha3,Epha5,Erbb2,Erbb3,Fam49b,Fermt3,Fes,Flna,Gpm6b,H2-M3,H2-T23,Hlx,Icam1,Igfbp2,Ikzf1,Il12b,Il1b,Il1rl2,Il4ra,Itpkb,Kdr,Kif26b,Lama1,Lgals9,Lims1,Loxl3,Lyn,Macf1,Myo1f,Nck2,Nckap1l,Ndnf,Npnt,Nrp1,Pde3b,Pde5a,Plau,Plpp3,Ptprc,Ptprj,Ret,Ripor2,S1pr1,Sema5a,Shh,Sox1…
GO Biological Process	GO:0006954	inflammatory response	28	4.95094e-34	6.36592e-30	2.27354e-31	7.08576	9.45559	67	0.000969406	0.00686898	19	6.45974e-11	8.30593e-07	4.37154e-08	2.46415	24.7549	61	432	0.0497553	0.141204	region_1030,region_1088,region_1216,region_1294,region_1314,region_1512,region_1520,region_1614,region_1859,region_1889,region_1907,region_203,region_2048,region_2280,region_2365,region_2603,region_2687,region_2716,region_2733,region_2824,region_306,region_3463,region_373,region_379,region_3835,region_4031,region_4086,region_4169,region_4178,region_4191,region_457,region_4641,region_4740,region_4…	Adora3,Agtr1a,Aif1,Alox5ap,Bmp6,C3ar1,Casp4,Ccl12,Ccl2,Ccl3,Ccl4,Ccl5,Ccrl2,Cd14,Cd300a,Chst2,Cxcl10,Cxcl2,Cyba,Dab2ip,Epha2,F2r,F2rl1,Fcer1g,Ffar3,Gal,Hck,Icam1,Igfbp4,Il1a,Il1b,Il1rap,Il1rl2,Il4ra,Jam3,Loxl3,Lta,Ltbr,Ly86,Ly96,Lyn,Ncf1,Nlrp1a,P2rx7,Pik3cd,Pik3cg,Plp1,Rps6ka4,Sigirr,Slamf8,Slc11a1,Tac4,Ticam2,Tlr2,Tlr4,Tlr6,Tlr9,Tnf,Tnfrsf21,Tnfrsf9,Tspan2
GO Biological Process	GO:0009617	response to bacterium	29	1.53491e-33	1.97359e-29	6.8055e-31	6.15141	12.0298	74	0.00123332	0.00758663	83	1.34034e-07	0.0017234	2.07639e-05	1.99531	31.574	63	551	0.0513866	0.114338	region_11,region_1216,region_1294,region_1314,region_1374,region_138,region_1586,region_1614,region_1679,region_1818,region_1859,region_1889,region_1907,region_203,region_2603,region_2687,region_2716,region_2743,region_2780,region_310,region_3329,region_3386,region_3611,region_373,region_3733,region_3736,region_375,region_3826,region_4031,region_4086,region_4169,region_4178,region_4191,region_431…	Adamts13,Card9,Ccl12,Ccl2,Ccl3,Ccl5,Cd14,Cd86,Cldn1,Cnp,Comt,Cxcl10,Cxcl16,Cxcl2,Dab2ip,Defb29,Epha2,F2r,Fcer1g,Gbp3,Gjb2,H2-M3,H2-T23,Hck,Hist1h2bf,Hist1h2bn,Hist1h2br,Icam1,Il10ra,Il12b,Il1b,Irf5,Irgm2,Kcnj8,Lalba,Lgals9,Lta,Ltbr,Ly96,Lyn,Lypd8,Mef2c,Myo1f,Ncf1,Nfkb1,Nlrp1a,Nod1,P2rx7,Plcg2,Ren1,Slamf8,Slc11a1,Snca,Ticam2,Tlr2,Tlr4,Tlr6,Tlr9,Tnf,Tnfaip8,Tnfrsf11a,Tnfrsf21,Tnfrsf9
GO Biological Process	GO:0006468	protein phosphorylation	30	1.55482e-32	1.99919e-28	6.66395e-30	4.97435	17.4897	87	0.00179308	0.00891942	110	6.46636e-07	0.00831445	7.55859e-05	1.75608	45.556	80	795	0.0652529	0.100629	region_1073,region_1135,region_1216,region_1294,region_1474,region_1512,region_1685,region_1859,region_1907,region_1932,region_2057,region_2239,region_2361,region_2437,region_2537,region_2592,region_2603,region_2687,region_2716,region_2733,region_279,region_2861,region_2916,region_3097,region_3191,region_3265,region_3271,region_3393,region_3463,region_3515,region_3523,region_3554,region_3611,regi…	Agtr1a,Alpk1,App,Camk1,Ccl12,Ccl2,Ccl3,Ccl5,Cdk18,Cdkl4,Dab2ip,Dclk2,Dmpk,Dok1,Epha10,Epha2,Epha3,Epha4,Epha5,Ephb1,Erbb2,Erbb3,F2r,Fam20c,Fes,Fgfr3,Gdf7,Grap,Grk3,Gucy2d,Hck,Htatip2,Il1b,Insrr,Itpkb,Kcnh3,Kdr,Lama1,Lrrk1,Lrrk2,Lyn,Map3k20,Mapk8ip1,Mark1,Mast4,Mdfic,Mef2c,Mertk,Met,Myc,Ntrk1,Ntrk2,Osm,P2rx7,Pdgfb,Pdgfra,Pik3cd,Pik3cg,Prkag2,Prkcb,Rassf2,Ret,Rps6ka4,Scg2,Sgk3,Slc11a1,Srpk3,Stat5a,…
GO Biological Process	GO:0051046	regulation of secretion	31	5.75184e-32	7.39572e-28	2.38572e-29	5.25479	15.4145	81	0.00158033	0.00830428	94	2.47809e-07	0.00318632	3.38971e-05	1.84747	40.0549	74	699	0.0603589	0.105866	region_1216,region_1279,region_1294,region_1306,region_1467,region_1859,region_1889,region_1900,region_1907,region_203,region_2048,region_2116,region_214,region_2242,region_2687,region_2716,region_2783,region_2824,region_3008,region_306,region_310,region_3151,region_3296,region_3327,region_3523,region_3554,region_3611,region_379,region_3826,region_3893,region_3936,region_4031,region_4156,region_4…	Adcy5,Adora2a,Adora3,Agtr1a,Ano1,Bglap2,Bmp6,Cacna1a,Casp4,Ccl3,Ccl5,Cd14,Cd244,Cd300a,Cd300c2,Cd74,Chrnb2,Comt,Cyba,Epha5,Erbb3,F2r,F2rl1,Fcer1g,Fes,Ffar3,Foxl2,Gal,Gpr27,H2-T23,Hk1,Ica1,Il1a,Il1b,Il1rap,Il4ra,Inhbb,Isl1,Lgals9,Lrp5,Lrrk2,Lyn,Mef2c,Nkx6-1,Nlrp1a,Osm,P2rx7,P2ry12,P2ry2,Pde3b,Rab15,Rasl10b,Ren1,Slc6a1,Snca,Sncaip,Sri,Syt12,Syt2,Tac4,Tgfb2,Tifab,Tlr2,Tlr4,Tlr6,Tlr9,Tnf,Tnfrsf11a,Tn…
GO Biological Process	GO:0032103	positive regulation of response to external stimulus	32	2.605e-31	3.34951e-27	1.04672e-28	8.90353	5.84038	52	0.000598768	0.00533115	9	3.89249e-12	5.00496e-08	5.56107e-09	3.09509	15.1853	47	265	0.0383361	0.177359	region_1216,region_1474,region_158,region_1859,region_1889,region_1907,region_212,region_2231,region_2280,region_2365,region_2687,region_306,region_3097,region_3112,region_341,region_379,region_3835,region_4086,region_4169,region_4178,region_4191,region_4545,region_457,region_4773,region_5074,region_5089,region_5277,region_5430,region_5723,region_6417,region_6430,region_6519,region_655,region_666…	Adora3,Aif1,Alox5ap,Artn,Bmp6,C3ar1,Ccl2,Ccl3,Ccl4,Ccl5,Cd74,Cdh13,Cxcl10,Cxcl12,Cxcl2,Cyba,F2rl1,Fcer1g,Ffar3,Il1b,Kdr,Ldlr,Lgals9,Lta,Ly86,Ly96,Met,Nckap1l,Nod1,Nrp1,Pdgfb,Pik3cg,Ptprj,Ripor2,S1pr1,Sash1,Scg2,Sema5a,Snca,Stat5a,Tlr2,Tlr4,Tlr6,Tlr9,Tnf,Tnfrsf11a,Zc3hav1
GO Biological Process	GO:0051050	positive regulation of transport	33	3.31724e-31	4.26531e-27	1.29252e-28	4.14215	24.3835	101	0.00249984	0.0103547	99	3.52833e-07	0.00453673	4.58255e-05	1.70435	53.9795	92	942	0.0750408	0.0976645	region_1022,region_1073,region_1147,region_1216,region_1279,region_1294,region_1306,region_1467,region_1653,region_1859,region_1900,region_1907,region_203,region_2048,region_2116,region_212,region_214,region_2190,region_2231,region_2242,region_2509,region_2603,region_2687,region_2716,region_2783,region_279,region_2824,region_2861,region_306,region_310,region_3151,region_32,region_3296,region_3500…	Abcb4,Adora2a,Adora3,Agtr1a,Ano1,Apela,App,Bglap2,Bmp6,Camk1,Casp4,Ccl12,Ccl2,Ccl3,Ccl4,Ccl5,Cd14,Cd244,Cd300c2,Cemip,Chrm1,Chrnb2,Cxcl10,Cxcl12,Cyba,Eda,Ehd2,Erbb2,Erfe,F2r,F2rl1,Fcer1g,Ffar3,Fhl1,Flna,Foxl2,Gal,Gpr27,H2-T23,Hk1,Hps4,Il1a,Il1b,Il1rap,Il4ra,Inhbb,Isl1,Ldlr,Lgals9,Lipg,Lrrk2,Mertk,Met,Msn,Nat8l,Nckap1l,Nkx6-1,Nlrp1a,P2rx7,P2ry12,P2ry2,Pdgfb,Plcg2,Prr5l,Rapgef3,Rasl10b,Rbpms,Scn4b,…
GO Biological Process	GO:0051270	regulation of cellular component movement	34	6.68548e-31	8.59618e-27	2.52829e-28	4.33595	21.9099	95	0.00224624	0.00973959	69	6.42896e-08	0.000826635	1.19802e-05	1.81036	47.5043	86	829	0.0701468	0.103739	region_1022,region_1069,region_1088,region_1209,region_1216,region_1276,region_1278,region_1314,region_1325,region_1512,region_1576,region_158,region_1586,region_1607,region_1614,region_1679,region_1907,region_1979,region_1985,region_214,region_2231,region_2242,region_2280,region_2361,region_2603,region_2687,region_2716,region_2783,region_2824,region_293,region_3097,region_3112,region_3265,region…	Ackr3,Adora3,Aif1,App,Arhgap18,Bex4,C3ar1,Ccl12,Ccl2,Ccl3,Ccl4,Ccl5,Cd300a,Cd74,Cdh13,Cemip,Cxcl10,Cxcl12,Cxcl16,Cxcl2,Dab2ip,Dock8,Epha2,Epha3,F2r,F2rl1,Fermt3,Fes,Flna,Hgf,Icam1,Il1a,Il1b,Jam3,Kdr,Lama1,Lgals9,Lmna,Lrch1,Lrrc15,Lyn,Macf1,Mcam,Met,Msn,Mtus1,Myo1f,Nckap1l,Nkx6-1,Nr2e1,Nrp1,P2ry12,P2ry6,Pax6,Pdgfb,Pdgfra,Pik3cd,Plau,Plpp3,Plxna4,Prox1,Prr5l,Ptprc,Ptprg,Ptprj,Ptprr,Rap2c,Ret,Ripor2…
GO Biological Process	GO:0043087	regulation of GTPase activity	35	1.44632e-30	1.85968e-26	5.31337e-28	6.63725	9.49188	63	0.000973127	0.00645889	26	4.17805e-10	5.37213e-06	2.0662e-07	2.39445	24.6403	59	430	0.048124	0.137209	region_1073,region_1198,region_1278,region_1314,region_1577,region_158,region_1614,region_1685,region_1793,region_1907,region_1919,region_2057,region_2188,region_2209,region_2217,region_2308,region_2516,region_2603,region_2651,region_269,region_2712,region_2716,region_286,region_3112,region_3167,region_3197,region_3265,region_3370,region_373,region_379,region_3870,region_391,region_3913,region_40…	Adrb1,Agap2,Arhgap18,Arhgap20,Arhgap23,Arhgap25,Arhgap30,Arhgap44,Arhgap45,Arhgdig,Arhgef16,Arhgef19,Asap1,Asap2,Ccl12,Ccl2,Ccl3,Ccl4,Ccl5,Chn2,Dab2ip,Depdc1a,Dock8,Epha2,Epha3,Epha4,Epha5,Erbb2,F11r,F2r,F2rl1,Gmip,Icam1,Lims1,Lrch1,Lrrk2,Met,Nckap1l,Nrp1,Ntrk1,Ntrk2,Ophn1,Rapgef3,Rasal1,Rgma,Rgs1,Rgs11,Rgs16,Rgs7,Rgs8,Rin3,Ripor2,S1pr1,Stmn3,Tbc1d1,Tbc1d2b,Tbc1d4,Tbc1d8b,Wnt4
GO Biological Process	GO:2000145	regulation of cell motility	36	1.63544e-30	2.10285e-26	5.84126e-28	4.45649	20.4197	91	0.00209346	0.00932951	52	1.19854e-08	0.000154108	2.96362e-06	1.90333	43.6077	83	761	0.0676998	0.109067	region_1022,region_1069,region_1088,region_1216,region_1276,region_1278,region_1314,region_1325,region_1512,region_1576,region_158,region_1586,region_1614,region_1679,region_1907,region_1979,region_1985,region_2231,region_2242,region_2280,region_2361,region_2603,region_2687,region_2716,region_2824,region_293,region_3097,region_3112,region_3265,region_329,region_3370,region_34,region_3532,region_3…	Ackr3,Adora3,Aif1,App,Arhgap18,Bex4,C3ar1,Ccl12,Ccl2,Ccl3,Ccl4,Ccl5,Cd300a,Cd74,Cdh13,Cemip,Cxcl10,Cxcl12,Cxcl16,Cxcl2,Dab2ip,Dock8,Epha2,Epha3,F2r,F2rl1,Fermt3,Fes,Flna,Hgf,Icam1,Il1a,Il1b,Jam3,Kdr,Lama1,Lgals9,Lmna,Lrch1,Lrrc15,Lyn,Macf1,Mcam,Met,Msn,Mtus1,Myo1f,Nckap1l,Nkx6-1,Nr2e1,Nrp1,P2ry12,P2ry6,Pax6,Pdgfb,Pdgfra,Pik3cd,Plau,Plpp3,Prox1,Prr5l,Ptprc,Ptprg,Ptprj,Ptprr,Rap2c,Ret,Ripor2,Rras2,…
GO Biological Process	GO:0051272	positive regulation of cellular component movement	37	2.50313e-30	3.21853e-26	8.69872e-28	6.44452	9.93092	64	0.00101814	0.00656141	42	6.27536e-09	8.06886e-05	1.92116e-06	2.24925	25.7864	58	450	0.0473083	0.128889	region_1216,region_1278,region_1314,region_1512,region_1576,region_158,region_1586,region_1614,region_1679,region_1907,region_1979,region_1985,region_214,region_2231,region_2280,region_2361,region_2603,region_2687,region_2716,region_2824,region_3097,region_3112,region_373,region_379,region_4031,region_4199,region_4545,region_457,region_4773,region_488,region_507,region_521,region_5240,region_5277…	Ackr3,Adora3,Aif1,App,C3ar1,Ccl12,Ccl2,Ccl3,Ccl4,Ccl5,Cd74,Cdh13,Cemip,Cxcl10,Cxcl12,Cxcl16,Cxcl2,Dab2ip,Dock8,F2r,F2rl1,Fermt3,Hgf,Icam1,Il1a,Il1b,Kdr,Lgals9,Lrrc15,Lyn,Mcam,Met,Myo1f,Nckap1l,Nrp1,P2ry6,Pdgfb,Pdgfra,Pik3cd,Plau,Plpp3,Prox1,Ptprc,Ptprj,Ret,Ripor2,Rras2,S1pr1,Sash1,Sema5a,Stat5a,Tac4,Tgfb2,Tgfbr2,Tlr2,Trf,Trpm4,Wnt7a
GO Biological Process	GO:0071495	cellular response to endogenous stimulus	38	3.93711e-30	5.06233e-26	1.33219e-27	4.4016	20.6743	91	0.00211957	0.00932951	340	0.000221146	1	0.00836321	1.49154	53.6357	80	936	0.0652529	0.0854701	region_1073,region_1075,region_1135,region_1216,region_1279,region_1306,region_1314,region_133,region_1374,region_1614,region_1637,region_1685,region_1793,region_1859,region_1889,region_2057,region_212,region_2195,region_2242,region_2361,region_286,region_287,region_293,region_306,region_3097,region_3265,region_3266,region_329,region_3327,region_3469,region_3611,region_373,region_375,region_3826,…	Abcb4,Adamts7,Agtr1a,Aif1,App,Bglap2,Bmp6,Cacna1a,Casp4,Casp7,Ccl2,Ccl5,Cd9,Cdh13,Cldn1,Cyba,Dusp15,Eif4ebp1,Epha3,Epha4,Epha5,Erbb2,Fat4,Fcer1g,Fgf5,Fgfr3,Fut8,Gata4,Gata5,Gdf7,Ghr,Gjb2,Glra1,Gm21973,Hcrtr1,Icam1,Igfbp2,Inhbb,Isl1,Lamtor5,Ldlr,Lhb,Lrrk2,Mef2c,Nfkb1,Nkx6-1,Nod1,Nr2e1,Nr2f1,Nr4a2,Ntrk1,Ntrk2,P2ry12,P2ry6,Pde3b,Pdgfb,Pdgfra,Pik3cg,Ramp2,Rapgef3,Ren1,Rgma,Snca,Sostdc1,Spint1,Stat5a,…
GO Biological Process	GO:0040017	positive regulation of locomotion	39	4.69556e-30	6.03755e-26	1.54809e-27	6.25293	10.3951	65	0.00106573	0.00666393	54	1.33867e-08	0.000172126	3.18752e-06	2.18601	26.9898	59	471	0.048124	0.125265	region_1216,region_1278,region_1314,region_1474,region_1512,region_1576,region_158,region_1586,region_1614,region_1679,region_1907,region_1979,region_1985,region_2231,region_2280,region_2361,region_2603,region_2687,region_2716,region_2824,region_3097,region_3112,region_373,region_379,region_4031,region_4199,region_4545,region_457,region_4773,region_488,region_507,region_521,region_5240,region_527…	Ackr3,Adora3,Aif1,App,Artn,C3ar1,Ccl12,Ccl2,Ccl3,Ccl4,Ccl5,Cd74,Cdh13,Cemip,Cxcl10,Cxcl12,Cxcl16,Cxcl2,Dab2ip,Dock8,F2r,F2rl1,Fermt3,Hgf,Icam1,Il1a,Il1b,Kdr,Lgals9,Lrrc15,Lyn,Mcam,Met,Myo1f,Nckap1l,Nrp1,P2ry6,Pdgfb,Pdgfra,Pik3cd,Plau,Plpp3,Prox1,Ptprc,Ptprj,Ret,Ripor2,Rras2,S1pr1,Sash1,Scg2,Sema5a,Stat5a,Tac4,Tgfb2,Tgfbr2,Tlr2,Trf,Wnt7a
GO Biological Process	GO:2000147	positive regulation of cell motility	40	4.88757e-30	6.28443e-26	1.57111e-27	6.48825	9.70987	63	0.000995475	0.00645889	43	7.04993e-09	9.0648e-05	2.10809e-06	2.26071	25.2134	57	440	0.0464927	0.129546	region_1216,region_1278,region_1314,region_1512,region_1576,region_158,region_1586,region_1614,region_1679,region_1907,region_1979,region_1985,region_2231,region_2280,region_2361,region_2603,region_2687,region_2716,region_2824,region_3097,region_3112,region_373,region_379,region_4031,region_4199,region_4545,region_457,region_4773,region_488,region_507,region_521,region_5240,region_5277,region_593…	Ackr3,Adora3,Aif1,App,C3ar1,Ccl12,Ccl2,Ccl3,Ccl4,Ccl5,Cd74,Cdh13,Cemip,Cxcl10,Cxcl12,Cxcl16,Cxcl2,Dab2ip,Dock8,F2r,F2rl1,Fermt3,Hgf,Icam1,Il1a,Il1b,Kdr,Lgals9,Lrrc15,Lyn,Mcam,Met,Myo1f,Nckap1l,Nrp1,P2ry6,Pdgfb,Pdgfra,Pik3cd,Plau,Plpp3,Prox1,Ptprc,Ptprj,Ret,Ripor2,Rras2,S1pr1,Sash1,Sema5a,Stat5a,Tac4,Tgfb2,Tgfbr2,Tlr2,Trf,Wnt7a
GO Biological Process	GO:1901698	response to nitrogen compound	41	9.00455e-30	1.15781e-25	2.82392e-27	4.53665	19.1771	87	0.00196608	0.00891942	335	0.0002081	1	0.00798733	1.51229	50.2548	76	877	0.0619902	0.0866591	region_102,region_1216,region_1279,region_1294,region_1306,region_1314,region_133,region_1374,region_1467,region_1614,region_1685,region_1793,region_1859,region_1889,region_2057,region_2242,region_2361,region_2687,region_287,region_306,region_3097,region_3137,region_3177,region_3266,region_3296,region_3327,region_341,region_3508,region_3611,region_370,region_373,region_3733,region_3736,region_375…	Abcb4,Adamts13,Adora2a,Agtr1a,Aif1,App,Bglap2,Cacna1a,Card9,Casp4,Casp7,Ccl2,Chrm1,Chrnb2,Cxcl2,Cyba,Dbh,Eif4ebp1,Epha4,Fundc1,Gal,Ghr,Gjb2,Gldc,Glra1,Gm13277,Gm13278,Gnai2,Gnal,Grin1,Hcrtr1,Hhex,Hsd11b2,Icam1,Il1b,Inhbb,Irf5,Kcnj8,Lamtor5,Lrp5,Lrrk2,Lyn,Mb21d1,Mc4r,Mef2c,Myc,Nfkb1,Nkx6-1,Nlrp1a,Nod1,Nr4a2,Ntrk1,Ntrk2,P2rx5,P2rx7,P2ry12,Pde3b,Pdgfra,Pik3cg,Prkar2b,Rapgef3,Ren1,Rftn1,Rgs8,Slc6a1,S…
GO Biological Process	GO:0030335	positive regulation of cell migration	42	2.08979e-29	2.68705e-25	6.39773e-27	6.56629	9.28987	61	0.000952417	0.00625385	49	9.62381e-09	0.000123743	2.52537e-06	2.27983	24.1246	55	421	0.0448613	0.130641	region_1216,region_1278,region_1314,region_1512,region_1576,region_158,region_1586,region_1614,region_1679,region_1907,region_1979,region_1985,region_2231,region_2280,region_2361,region_2603,region_2687,region_2716,region_2824,region_3097,region_3112,region_373,region_379,region_4031,region_4199,region_4545,region_457,region_4773,region_488,region_507,region_521,region_5240,region_5277,region_593…	Ackr3,Adora3,Aif1,App,C3ar1,Ccl12,Ccl2,Ccl3,Ccl4,Ccl5,Cd74,Cdh13,Cemip,Cxcl10,Cxcl12,Cxcl16,Cxcl2,Dab2ip,Dock8,F2r,F2rl1,Fermt3,Hgf,Icam1,Il1a,Il1b,Kdr,Lgals9,Lrrc15,Lyn,Mcam,Met,Myo1f,Nckap1l,Nrp1,P2ry6,Pdgfb,Pdgfra,Pik3cd,Plau,Plpp3,Prox1,Ptprc,Ptprj,Ret,Ripor2,Rras2,S1pr1,Sash1,Sema5a,Stat5a,Tgfb2,Tgfbr2,Tlr2,Wnt7a
GO Biological Process	GO:0002237	response to molecule of bacterial origin	43	2.09644e-29	2.69561e-25	6.26885e-27	7.68459	7.02705	54	0.000720428	0.00553619	44	8.24904e-09	0.000106066	2.41059e-06	2.50859	18.337	46	320	0.0375204	0.14375	region_1216,region_1294,region_1314,region_1374,region_138,region_1614,region_1679,region_1818,region_1859,region_1889,region_1907,region_203,region_2603,region_2687,region_2716,region_2743,region_3386,region_3611,region_373,region_3733,region_3736,region_375,region_3826,region_4031,region_4086,region_4169,region_4191,region_4316,region_4773,region_5386,region_5430,region_5620,region_5820,region_…	Adamts13,Card9,Ccl12,Ccl2,Ccl3,Ccl5,Cd14,Cd86,Cldn1,Cnp,Comt,Cxcl10,Cxcl16,Cxcl2,Dab2ip,F2r,Gjb2,H2-M3,Icam1,Il10ra,Il12b,Il1b,Irf5,Irgm2,Kcnj8,Lgals9,Lta,Ltbr,Ly96,Lyn,Mef2c,Nfkb1,P2rx7,Plcg2,Ren1,Slc11a1,Snca,Ticam2,Tlr2,Tlr4,Tlr6,Tlr9,Tnf,Tnfrsf11a,Tnfrsf21,Tnfrsf9
GO Biological Process	GO:0007417	central nervous system development	44	2.14912e-29	2.76334e-25	6.28031e-27	3.98938	24.8159	99	0.00254418	0.0101497	103	4.42204e-07	0.00568586	5.52025e-05	1.70717	52.7189	90	920	0.0734095	0.0978261	region_1072,region_1073,region_1101,region_1135,region_1209,region_1216,region_1262,region_138,region_1467,region_1571,region_158,region_1607,region_1637,region_1647,region_1870,region_1901,region_1932,region_1985,region_20,region_2057,region_2231,region_2242,region_2268,region_2609,region_2733,region_2743,region_2858,region_293,region_3137,region_3159,region_329,region_3296,region_3327,region_33…	Abcb4,Actl6b,Adora2a,Aldh1a2,App,Barhl1,Basp1,Cacna1a,Casp4,Cd9,Chrnb2,Cnp,Cxcl12,Dab2ip,Dcc,Dclk2,Disc1,Dlx2,Dmrt3,Dner,Efna2,Emx1,Emx2,En2,Epha4,Epha5,Ephb1,Erbb2,Faim2,Fat4,Fez1,Fezf1,Fgfr3,Gdf7,Grin1,Hapln3,Hhex,Hoxc10,Hoxd10,Ikzf1,Ina,Isl1,Itga8,Klhl1,Lamc3,Lhx4,Loxl3,Lrrk2,Lyn,Met,Ncan,Ndrg2,Nes,Neurog2,Nfib,Nkx6-1,Nr2e1,Nr2f1,Nr4a2,Nrp1,Nrp2,Ntrk2,Otx1,Pam,Pax5,Pax6,Plp1,Plpp3,Plxna4,Pou3f…
GO Biological Process	GO:0030334	regulation of cell migration	45	2.33243e-29	2.99904e-25	6.66452e-27	4.47369	19.447	87	0.00199375	0.00891942	56	1.74984e-08	0.000224995	4.01776e-06	1.92278	41.0863	79	717	0.0644372	0.110181	region_1022,region_1069,region_1088,region_1216,region_1276,region_1278,region_1314,region_1325,region_1512,region_1576,region_158,region_1586,region_1614,region_1679,region_1907,region_1979,region_1985,region_2231,region_2242,region_2280,region_2361,region_2603,region_2687,region_2716,region_2824,region_293,region_3097,region_3112,region_3265,region_329,region_34,region_3532,region_37,region_373…	Ackr3,Adora3,Aif1,App,Bex4,C3ar1,Ccl12,Ccl2,Ccl3,Ccl4,Ccl5,Cd300a,Cd74,Cdh13,Cemip,Cxcl10,Cxcl12,Cxcl16,Cxcl2,Dab2ip,Dock8,Epha2,Epha3,F2r,F2rl1,Fermt3,Flna,Hgf,Icam1,Il1a,Il1b,Jam3,Kdr,Lama1,Lgals9,Lmna,Lrch1,Lrrc15,Lyn,Macf1,Mcam,Met,Msn,Mtus1,Myo1f,Nckap1l,Nkx6-1,Nr2e1,Nrp1,P2ry12,P2ry6,Pax6,Pdgfb,Pdgfra,Pik3cd,Plau,Plpp3,Prox1,Prr5l,Ptprc,Ptprg,Ptprj,Ptprr,Rap2c,Ret,Ripor2,Rras2,S1pr1,Sash1,S…
GO Biological Process	GO:0030182	neuron differentiation	46	2.50615e-29	3.22241e-25	7.00523e-27	3.9473	25.3338	100	0.00259727	0.0102522	87	1.77906e-07	0.00228752	2.62934e-05	1.72471	53.9222	93	941	0.0758564	0.098831	region_1046,region_1072,region_1073,region_1088,region_1101,region_1135,region_1198,region_120,region_1209,region_1299,region_138,region_1467,region_150,region_1571,region_158,region_1607,region_1651,region_1685,region_1859,region_1870,region_1901,region_1932,region_198,region_20,region_2057,region_2231,region_2242,region_2268,region_236,region_2522,region_2542,region_2609,region_2743,region_286,…	Adora2a,Aldh1a2,App,Artn,B3gnt2,Bhlhe23,Cacna1a,Chrnb2,Cnp,Crb1,Ctnnd2,Cxcl12,Dab2ip,Dcc,Dcdc2a,Dclk2,Disc1,Dlx2,Dmrt3,Dst,Efna2,Emx1,Emx2,En2,Epha2,Epha3,Epha4,Epha5,Ephb1,Erbb2,Faim2,Fat4,Fez1,Fezf1,Fgfr3,Foxd1,Fry,Fzd2,Gdf7,Hoxc10,Hoxd10,Hoxd9,Ikzf1,Isl1,Jam3,Klhl1,Lama1,Lhx4,Lhx9,Lrrk2,Lyn,Map6,Mef2c,Nck2,Neurog2,Nfib,Nkx6-1,Nptx1,Nr2e1,Nr4a2,Nrp1,Nrp2,Ntrk1,Ntrk2,Nyap1,Pam,Pax5,Pax6,Pdgfb,Pl…
GO Biological Process	GO:0050865	regulation of cell activation	47	2.99772e-29	3.85447e-25	8.201e-27	5.16162	14.5303	75	0.00148968	0.00768915	14	1.64275e-11	2.11225e-07	1.50875e-08	2.40217	28.3077	68	494	0.0554649	0.137652	region_1073,region_1278,region_1285,region_1400,region_1467,region_1608,region_1676,region_1818,region_1859,region_1889,region_2090,region_212,region_2195,region_2327,region_2361,region_2537,region_2687,region_2733,region_279,region_3097,region_310,region_3112,region_3296,region_3359,region_3393,region_3456,region_3611,region_379,region_3893,region_4031,region_4178,region_4235,region_4325,region_…	Adora2a,Adora3,Aif1,App,Ccl2,Ccl5,Cd1d1,Cd244,Cd300a,Cd37,Cd74,Cd83,Cd86,Cd9,Chrnb2,Dock8,Duxbl1,Duxbl2,Duxbl3,Erbb2,F2rl1,Fam49b,Fcer1g,Fes,Gal,H2-M3,H2-T23,Hlx,Igfbp2,Ikzf1,Ikzf3,Il12b,Il1b,Il1rl2,Il4ra,Itpkb,Ldlr,Lgals9,Loxl3,Lyn,Mef2c,Mertk,Nck2,Nckap1l,Nfatc2,Pde5a,Pdgfb,Pdgfra,Pla2g5,Plek,Ptprc,Ptpre,Ptprj,Ripor2,Shh,Snca,Sox13,Stat5a,Tgfbr2,Tlr4,Tlr6,Tlr9,Tnfrsf21,Tnfsf13b,Tnfsf9,Tyro3,Vsi…
GO Biological Process	GO:0045321	leukocyte activation	48	3.16084e-29	4.06421e-25	8.46711e-27	5.30622	13.7574	73	0.00141044	0.00748411	20	6.59068e-11	8.4743e-07	4.23715e-08	2.40187	26.6459	64	465	0.0522023	0.137634	region_102,region_1278,region_1294,region_1314,region_1391,region_1467,region_1512,region_1547,region_1586,region_1614,region_1685,region_1818,region_1859,region_1907,region_210,region_217,region_2231,region_2537,region_279,region_2910,region_3097,region_310,region_313,region_3193,region_3393,region_3611,region_373,region_379,region_4031,region_415,region_4178,region_4235,region_4244,region_4504,…	Adora3,Aif1,Apbb1ip,Bcl2a1d,Blnk,Ccl3,Ccl5,Cd151,Cd1d1,Cd244,Cd300a,Cd74,Cd86,Chrnb2,Cxcl12,Dock8,Elf4,Ephb1,F2rl1,Fcer1g,Fut7,Fzd8,Gm13277,Gm13278,H2-M3,H2-T23,Hhex,Icam1,Ikzf1,Ikzf3,Il12b,Irf4,Itpkb,Lat2,Ltbr,Lyl1,Lyn,Mef2c,Mertk,Msn,Myo1f,Nck2,Nfatc1,Ntrk1,P2rx7,Pik3cd,Plcg2,Prkcb,Ptprc,Shh,Slc11a1,Snca,Spi1,Stat5a,Stx11,Tac4,Tgfbr2,Tlr4,Tlr9,Tnfsf9,Tyro3,Tyrobp,Wnt1,Wnt4
GO Biological Process	GO:1901701	cellular response to oxygen-containing compound	49	5.87007e-29	7.54773e-25	1.54035e-26	4.56125	18.416	84	0.00188805	0.00861185	238	4.37109e-05	0.562035	0.00236149	1.58836	47.8481	76	835	0.0619902	0.091018	region_1101,region_1216,region_1279,region_1306,region_1314,region_1374,region_1467,region_1614,region_1679,region_1793,region_1859,region_1889,region_1907,region_203,region_2057,region_212,region_2242,region_2315,region_2361,region_2603,region_2687,region_287,region_306,region_3097,region_3265,region_3266,region_3327,region_3386,region_3611,region_373,region_375,region_4031,region_4072,region_40…	Abcb4,Adamts13,Adcy5,Agtr1a,Aif1,Aldh1a2,App,Bglap2,Cacna1a,Casp4,Ccl12,Ccl2,Ccl3,Ccl5,Cd14,Cd86,Chrm1,Chrnb2,Cldn1,Cxcl10,Cxcl16,Cxcl2,Cyba,Dab2ip,Eif4ebp1,Epha3,Epha4,Epha5,Ffar3,Ghr,Gjb2,Glra1,Gnai2,Icam1,Il12b,Il1b,Inhbb,Irgm2,Lamtor5,Ldlr,Lrrk2,Ly96,Lyn,Mef2c,Msn,Ncf1,Nfatc4,Nfkb1,Nkx6-1,Nod1,Nr4a2,Ntrk2,P2ry12,P2ry6,Pde3b,Pdgfb,Pdgfra,Pik3cg,Prkcb,Rapgef3,Ret,Rgs8,Slc29a1,Spi1,Stat5a,Tbc1d4…
GO Biological Process	GO:0031349	positive regulation of defense response	50	6.65158e-29	8.5526e-25	1.71052e-26	8.84294	5.42806	48	0.000556496	0.00492106	30	6.55033e-10	8.42241e-06	2.80747e-07	2.90851	14.0966	41	246	0.0334421	0.166667	region_1216,region_1818,region_1859,region_1889,region_1907,region_203,region_2116,region_212,region_2687,region_306,region_3097,region_310,region_330,region_3386,region_341,region_3508,region_3611,region_3736,region_379,region_3835,region_3936,region_4086,region_4169,region_4178,region_4191,region_4316,region_4322,region_457,region_4795,region_5074,region_5089,region_5277,region_5430,region_5615…	Adora3,Alox5ap,Card9,Ccl3,Cd14,Cd74,Cd86,Cyba,F2rl1,Fcer1g,Ffar3,H2-M3,H2-T23,Il12b,Il1b,Irgm2,Ldlr,Lgals9,Lta,Ly96,Mb21d1,Mef2c,Nlrc5,Nod1,Parp9,Pik3ap1,Pik3cg,Rftn1,Snca,Stat5a,Ticam2,Tlr2,Tlr4,Tlr6,Tlr9,Tnf,Tnfrsf11a,Trim12c,Unc93b1,Zbp1,Zc3hav1
GO Biological Process	GO:0033993	response to lipid	51	9.1811e-29	1.18051e-24	2.31472e-26	4.43139	19.407	86	0.00198964	0.0088169	185	1.17587e-05	0.151193	0.00081726	1.64471	46.8166	77	817	0.0628059	0.0942473	region_1075,region_1101,region_1294,region_1314,region_1374,region_138,region_1614,region_1637,region_1679,region_1859,region_1907,region_203,region_212,region_2195,region_2603,region_2687,region_2716,region_2743,region_287,region_293,region_306,region_3265,region_3266,region_329,region_3342,region_3386,region_3469,region_3611,region_370,region_3710,region_373,region_375,region_3826,region_4031,r…	Abcb4,Adamts13,Adcy5,Agtr1a,Aif1,Aldh1a2,Arpc1b,Bmp6,Ccl12,Ccl2,Ccl3,Ccl5,Cd14,Cd86,Cldn1,Cnp,Comt,Cxcl10,Cxcl16,Cxcl2,Cyba,Dab2ip,Eif4ebp1,Epha3,Epha5,F2r,Ffar3,Gata4,Ghr,Gjb2,Gldc,Hoxd13,Hsd11b2,Icam1,Igfbp2,Il10ra,Il12b,Il1b,Irgm2,Isl1,Kcnj8,Ldlr,Lgals9,Lta,Ltbr,Ly96,Lyn,Mef2c,Mmp15,Msn,Mtap,Nfatc4,Nfkb1,Nr2e1,Nr2f1,Nr4a2,P2rx7,P2ry6,Plcg2,Ramp2,Ren1,Ret,Slc11a1,Slc6a1,Snca,Tgfb2,Tgfbr2,Thrb,T…
GO Biological Process	GO:0048646	anatomical structure formation involved in morphogenesis	52	1.69397e-28	2.17811e-24	4.18868e-26	4.055	23.1812	94	0.00237659	0.00963707	134	1.87351e-06	0.0240896	0.000179773	1.67799	50.6559	85	884	0.0693312	0.0961538	region_1035,region_1060,region_1075,region_1088,region_1141,region_1375,region_1397,region_1474,region_150,region_158,region_181,region_1901,region_192,region_206,region_210,region_2138,region_2190,region_2231,region_236,region_2361,region_2603,region_2858,region_286,region_2910,region_293,region_313,region_329,region_3327,region_3371,region_3469,region_3554,region_3611,region_3652,region_37,regi…	Ackr3,Adamts1,Cacna1a,Casp8,Ccl12,Ccl2,Cd9,Cdh13,Cxcl12,Dab2ip,Dusp2,Eda,Epha2,Ephb1,Ets2,Faim2,Fam20c,Fjx1,Flna,Foxd1,Fzd1,Fzd2,Fzd8,Gata4,Gdf7,Hhex,Htatip2,Irx3,Isl1,Itga8,Jam3,Kdr,Kif26b,Krt8,Macf1,Mcam,Mef2c,Mesp1,Mmp15,Mybpc2,Ndnf,Nfatc1,Nfatc4,Nfib,Notch4,Nr2e1,Nrp1,Nrp2,Pax6,Pde3b,Pdgfra,Perp,Pik3cg,Plcd1,Prox1,Ramp1,Ramp2,Rapgef3,Ret,Rgma,Rnf213,S1pr1,Scg2,Sema5a,Sh3pxd2a,Shh,Six4,Slc24a4…
GO Biological Process	GO:0043069	negative regulation of programmed cell death	53	1.9025e-28	2.44623e-24	4.61553e-26	4.0484	23.219	94	0.00238046	0.00963707	193	1.47243e-05	0.189325	0.000980961	1.60605	51.0571	82	891	0.0668842	0.0920314	region_1069,region_1075,region_1278,region_1314,region_1375,region_1474,region_158,region_1614,region_1685,region_1765,region_181,region_2057,region_2217,region_2231,region_2366,region_2537,region_2542,region_2603,region_2687,region_2716,region_2784,region_279,region_2808,region_2861,region_293,region_3097,region_3137,region_3159,region_329,region_3296,region_3327,region_3329,region_3393,region_3…	Ackr3,Adora2a,Agap2,Agtr1a,Aif1,Amigo2,Barhl1,Bcl2a1a,Bcl2a1b,Bcl2a1d,Bhlhe23,Birc3,Cacna1a,Casp8,Ccl12,Ccl2,Ccl5,Cd74,Cerkl,Chst11,Cntfr,Creb3l1,Cxcl12,Dock8,En2,Erbb3,Evi2b,F2r,Faim2,Fcer1g,Flna,Gata4,Gm29094,Grin1,Hck,Hgf,Hpn,Icam1,Il1b,Isl1,Itpkb,Kdr,Lamtor5,Lhx4,Lims1,Lmna,Lrrk2,Mapk8ip1,Mef2c,Mertk,Met,Myc,Nckap1l,Ndnf,Nes,Nr2e1,Nr4a2,Nrp1,Ntrk1,Ntrk2,Pik3cg,Plaur,Plcg2,Ramp2,Scg2,Sema5a,Sg…
GO Biological Process	GO:0045088	regulation of innate immune response	54	2.70806e-28	3.48203e-24	6.4482e-26	8.82245	5.32732	47	0.000546168	0.00481854	24	3.44947e-10	4.43533e-06	1.84805e-07	2.96885	13.8101	41	241	0.0334421	0.170125	region_1216,region_1259,region_1586,region_1818,region_1859,region_1889,region_1922,region_203,region_2116,region_2354,region_306,region_3097,region_310,region_330,region_3386,region_3393,region_341,region_3508,region_3736,region_3769,region_379,region_3936,region_4031,region_4086,region_4169,region_4316,region_4322,region_4641,region_4795,region_5088,region_5277,region_5615,region_5820,region_59…	A2m,Birc3,Card9,Cd14,Cd300a,Cd74,Cd86,Cyba,Dab2ip,F2rl1,H2-M3,H2-T23,Il12b,Irf4,Irgm2,Klrb1b,Lgals9,Ly96,Lyn,Mb21d1,Myo1f,Nlrc5,Nlrx1,Parp9,Pik3ap1,Rftn1,Serping1,Slamf8,Stat5a,Susd4,Ticam2,Tlr2,Tlr4,Tlr6,Tlr9,Trim12c,Trim30a,Tyro3,Unc93b1,Zbp1,Zc3hav1
GO Biological Process	GO:0032989	cellular component morphogenesis	55	3.69453e-28	4.75043e-24	8.63715e-26	4.34	19.8157	86	0.00203154	0.0088169	88	1.8275e-07	0.0023498	2.67023e-05	1.8357	41.9459	77	732	0.0628059	0.105191	region_1046,region_1060,region_1073,region_1135,region_120,region_1209,region_1294,region_1299,region_1375,region_138,region_1467,region_150,region_1571,region_158,region_1607,region_1651,region_1685,region_1859,region_1901,region_2116,region_2138,region_2231,region_2268,region_2361,region_2397,region_2522,region_2542,region_2743,region_279,region_2858,region_293,region_3112,region_3116,region_31…	Adora2a,Antxr1,App,Artn,B3gnt2,Cacna1a,Cd9,Chrnb2,Cnmd,Cnp,Ctnnd2,Cxcl12,Dab2ip,Dact2,Dcc,Dcdc2a,Dst,Efna2,Emx1,Epha2,Epha4,Epha5,Ephb1,Erbb2,Fermt3,Fez1,Fezf1,Fgfr3,Foxd1,Fry,Gdf7,Hgf,Isl1,Itga8,Krt8,Lamc3,Lhx4,Lhx9,Lrrk2,Map6,Mef2c,Mertk,Met,Mybpc2,Nes,Neurog2,Nfib,Nptx1,Nr2e1,Nr4a2,Nrp1,Nrp2,Ntrk1,Nyap1,P2rx7,Pam,Pax6,Pdgfra,Plxna4,Prox1,Ptpro,Ripor2,Sema5a,Shh,Six4,Tal1,Tgfb2,Tlr9,Tmod1,Tnik,…
GO Biological Process	GO:0098542	defense response to other organism	56	6.96246e-28	8.95233e-24	1.59863e-25	6.13511	9.94277	61	0.00101935	0.00625385	108	5.64359e-07	0.00725652	6.71901e-05	2.03533	26.5313	54	463	0.0440457	0.116631	region_102,region_11,region_1216,region_1294,region_1347,region_1512,region_1586,region_1818,region_1859,region_1889,region_2116,region_2354,region_2697,region_2780,region_310,region_3329,region_3386,region_341,region_3508,region_3575,region_3733,region_3736,region_379,region_3936,region_4178,region_4191,region_4316,region_4322,region_4607,region_4641,region_4773,region_4795,region_5240,region_56…	Apobec3,Card9,Cd37,Cd86,Cxcl10,Defb29,Epha2,F2rl1,Fcer1g,Gbp3,Gm13277,Gm13278,H2-M3,H2-T23,Hck,Hist1h2bf,Hist1h2bn,Hist1h2br,Ifit2,Il10rb,Il12b,Il4ra,Irf4,Irf5,Irgm2,Kcnj8,Lalba,Lta,Lypd8,Mb21d1,Myo1f,Ncf1,Nlrc5,Nlrp1a,Nod1,Oasl1,P2rx7,Pik3cd,Ptprc,Slamf8,Slc11a1,Tagap,Ticam2,Tlr2,Tlr4,Tlr6,Tlr9,Tnf,Tnfaip8,Trim12c,Trim30a,Unc93b1,Zbp1,Zc3hav1
GO Biological Process	GO:0009887	animal organ morphogenesis	57	9.9314e-28	1.27698e-23	2.24031e-25	3.78815	26.1342	99	0.00267933	0.0101497	106	4.78516e-07	0.00615276	5.80449e-05	1.68706	55.1256	93	962	0.0758564	0.0966736	region_1035,region_1101,region_1135,region_1294,region_1375,region_1397,region_150,region_1571,region_158,region_1647,region_181,region_1870,region_1901,region_198,region_2057,region_210,region_2190,region_236,region_2361,region_2858,region_3097,region_3108,region_3112,region_313,region_3151,region_3342,region_3371,region_3469,region_3554,region_3611,region_3634,region_3652,region_37,region_3739,…	Adamts1,Aldh1a2,Alx3,Aqp5,Bhlhe23,Bmp6,Chst11,Col27a1,Crb1,Dlx2,Eda,Emx1,Epha2,Ephb1,Fam20c,Fat4,Fgfr3,Fjx1,Fli1,Flna,Foxd1,Foxe1,Foxl2,Fzd1,Fzd2,Gata4,Gdf7,Hhex,Hlx,Hoxa5,Hoxd10,Hoxd11,Hoxd13,Hoxd9,Hpn,Ikzf1,Irx3,Isl1,Itga8,Kdr,Kif26b,Lama1,Lhx4,Lhx9,Lrig3,Lrp5,Lrrk2,Mef2c,Mesp1,Msn,Myc,Myl3,Nfatc1,Nfib,Npnt,Nrp1,Nrp2,Ntrk2,Otx1,P2rx7,Pax5,Pax6,Pdgfb,Pdgfra,Perp,Prox1,Ripor2,S1pr1,Sfrp4,Sh3pxd2b…
GO Biological Process	GO:0010243	response to organonitrogen compound	58	1.21813e-27	1.56627e-23	2.70046e-25	4.67053	16.7005	78	0.00171217	0.00799672	358	0.00028241	1	0.0101431	1.54251	43.4358	67	758	0.0546493	0.0883905	region_1216,region_1279,region_1294,region_1306,region_1314,region_133,region_1374,region_1467,region_1614,region_1685,region_1793,region_1859,region_1889,region_2057,region_2242,region_2361,region_2687,region_287,region_306,region_3097,region_3137,region_3177,region_3266,region_3296,region_3327,region_3611,region_370,region_373,region_3733,region_3736,region_375,region_3826,region_4,region_4031,…	Abcb4,Adamts13,Adora2a,Agtr1a,Aif1,App,Bglap2,Cacna1a,Card9,Casp4,Casp7,Ccl2,Chrnb2,Cxcl2,Cyba,Dbh,Eif4ebp1,Epha4,Fundc1,Gal,Ghr,Gjb2,Gldc,Glra1,Gnal,Grin1,Hcrtr1,Hhex,Hsd11b2,Icam1,Il1b,Inhbb,Irf5,Lamtor5,Lrp5,Lrrk2,Lyn,Mc4r,Mef2c,Myc,Nfkb1,Nkx6-1,Nlrp1a,Nod1,Nr4a2,Ntrk1,Ntrk2,P2rx5,P2rx7,P2ry12,Pde3b,Pdgfra,Pik3cg,Prkar2b,Rapgef3,Ren1,Slc6a1,Snca,Stat5a,Tbc1d4,Tlr2,Tlr4,Tlr6,Tlr9,Tnf,Trpm2,Wnt1
GO Biological Process	GO:0043549	regulation of kinase activity	59	1.6321e-27	2.09855e-23	3.55687e-25	4.64841	16.7799	78	0.00172031	0.00799672	230	3.55968e-05	0.457703	0.00199001	1.62815	43.6077	71	761	0.0579119	0.0932983	region_1073,region_1135,region_1180,region_1294,region_1433,region_1464,region_1576,region_181,region_1859,region_1889,region_2361,region_2424,region_2592,region_2687,region_2716,region_2910,region_2916,region_3177,region_3296,region_3386,region_34,region_3554,region_3778,region_4031,region_4191,region_4248,region_4331,region_4404,region_443,region_4545,region_456,region_4641,region_477,region_47…	Adora2a,Agap2,Agtr1a,App,Camk1,Ccl5,Cd300a,Cd74,Cemip,Dab2ip,Dusp16,Dusp2,Eef1a2,Epha4,Erbb2,Erbb3,F2r,Fgfr3,Fzd8,Gnai2,Gprc5a,Grm4,Hgf,Hhex,Il12b,Il1b,Irgm2,Lgals9,Lrp5,Lrrc15,Lrrc4,Lrrk2,Lyn,Map3k20,Mapk8ip1,Mdfic,Met,Ncf1,Nckap1l,Nlrc5,P2rx7,Pde5a,Pdgfb,Pdgfra,Pik3cg,Pkia,Prkag2,Prkar2b,Prox1,Ptprc,Ptprj,Rap2c,Rassf2,Sash1,Slamf8,Slc11a1,Snca,Spred2,Tgfa,Tgfb2,Tgfbr2,Tlr4,Tlr6,Tlr9,Tnf,Tnfrsf1…
GO Biological Process	GO:0007267	cell-cell signaling	60	1.70902e-27	2.19745e-23	3.66242e-25	4.15498	21.1794	88	0.00217135	0.00902194	125	1.37134e-06	0.0176327	0.000141062	1.72978	45.6706	79	797	0.0644372	0.0991217	region_1190,region_1294,region_1391,region_1467,region_150,region_1653,region_1771,region_1907,region_1985,region_2057,region_214,region_2315,region_236,region_2437,region_2716,region_2817,region_2910,region_3137,region_3203,region_3296,region_33,region_3327,region_3469,region_3508,region_3611,region_3652,region_395,region_4031,region_4072,region_4199,region_4418,region_456,region_457,region_4677…	Adora2a,Adora3,Adra1d,Adrb1,Cacna1a,Ccl3,Ccl5,Chrm1,Chrnb2,Disc1,Erap1,F2r,Fjx1,Foxd1,Fzd1,Fzd2,Fzd8,Gata4,Gjb2,Glra1,Grin1,Grm4,Grm7,Hgf,Hhex,Hoxa5,Kcnmb4,Kcnn2,Kremen2,Lhb,Lrp5,Lrrk2,Lyn,Macf1,Mark1,Mb21d1,Mc4r,Mef2c,Met,Mgat3,Myc,Ndrg2,Nkd2,Nsg1,Ntrk2,P2rx5,P2rx7,Panx2,Pcdh10,Pcdhac1,Pcdhga10,Pcdhga11,Pcdhga9,Pcdhgb5,Pcdhgc5,Pdgfb,Pdlim4,Pdyn,Plpp3,Ppy,Scn4b,Sfrp4,Shh,Slc12a4,Slc29a1,Slc6a1,Sn…
GO Biological Process	GO:0060548	negative regulation of cell death	61	1.93232e-27	2.48457e-23	4.07307e-25	3.84985	24.936	96	0.00255649	0.00984212	286	0.000100035	1	0.00449738	1.51123	55.584	84	970	0.0685155	0.0865979	region_1069,region_1075,region_1278,region_1314,region_1375,region_1474,region_158,region_1614,region_1685,region_1765,region_181,region_2057,region_2217,region_2231,region_2366,region_2537,region_2542,region_2603,region_2687,region_2716,region_2784,region_279,region_2808,region_2861,region_293,region_3097,region_3137,region_3159,region_329,region_3296,region_3327,region_3329,region_3393,region_3…	Abcb4,Ackr3,Adora2a,Agap2,Agtr1a,Aif1,Amigo2,Barhl1,Bcl2a1a,Bcl2a1b,Bcl2a1d,Bhlhe23,Birc3,Cacna1a,Casp8,Ccl12,Ccl2,Ccl5,Cd74,Cerkl,Chst11,Cntfr,Creb3l1,Cxcl12,Dock8,En2,Erbb3,Evi2b,F2r,Faim2,Fcer1g,Flna,Fzd1,Gata4,Gm29094,Grin1,Hck,Hgf,Hpn,Icam1,Il1b,Isl1,Itpkb,Kdr,Lamtor5,Lhx4,Lims1,Lmna,Lrrk2,Mapk8ip1,Mef2c,Mertk,Met,Myc,Nckap1l,Ndnf,Nes,Nr2e1,Nr4a2,Nrp1,Ntrk1,Ntrk2,Pik3cg,Plaur,Plcg2,Ramp2,Scg…
GO Biological Process	GO:0006935	chemotaxis	62	2.61541e-27	3.36289e-23	5.42402e-25	5.21825	13.2228	69	0.00135563	0.00707402	10	4.33263e-12	5.57089e-08	5.57089e-09	2.55576	25.0415	64	437	0.0522023	0.146453	region_1030,region_1073,region_1209,region_1279,region_1306,region_1474,region_150,region_1512,region_158,region_1607,region_1679,region_1685,region_1901,region_1907,region_214,region_2231,region_2268,region_2280,region_2361,region_2522,region_2603,region_2687,region_3112,region_3739,region_388,region_3893,region_4031,region_415,region_4178,region_420,region_4545,region_4641,region_466,region_477…	Ackr3,Agtr1a,App,Arhgef16,Artn,B3gnt2,C3ar1,Ccl12,Ccl2,Ccl3,Ccl4,Ccl5,Ccrl2,Cmtm3,Cmtm8,Cxcl10,Cxcl12,Cxcl16,Cxcl2,Dcc,Efna2,Epha2,Epha4,Epha5,Ephb1,Erbb2,Fcer1g,Fes,Fez1,Fezf1,Foxd1,Gdf7,Hgf,Il1b,Isl1,Lgals9,Lhx4,Lhx9,Lyn,Met,Nckap1l,Neurog2,Nfib,Nrp1,Nrp2,Ntrk1,Pam,Pax6,Pdgfb,Pdgfra,Pik3cd,Pik3cg,Plxna4,Ptprj,Ptpro,Ripor2,S1pr1,Scg2,Sema5a,Shh,Slamf8,Tgfb2,Trpm2,Trpm4
GO Biological Process	GO:0042330	taxis	63	3.15361e-27	4.05491e-23	6.43636e-25	5.20086	13.267	69	0.00136016	0.00707402	11	5.31395e-12	6.83267e-08	6.21152e-09	2.54412	25.1561	64	439	0.0522023	0.145786	region_1030,region_1073,region_1209,region_1279,region_1306,region_1474,region_150,region_1512,region_158,region_1607,region_1679,region_1685,region_1901,region_1907,region_214,region_2231,region_2268,region_2280,region_2361,region_2522,region_2603,region_2687,region_3112,region_3739,region_388,region_3893,region_4031,region_415,region_4178,region_420,region_4545,region_4641,region_466,region_477…	Ackr3,Agtr1a,App,Arhgef16,Artn,B3gnt2,C3ar1,Ccl12,Ccl2,Ccl3,Ccl4,Ccl5,Ccrl2,Cmtm3,Cmtm8,Cxcl10,Cxcl12,Cxcl16,Cxcl2,Dcc,Efna2,Epha2,Epha4,Epha5,Ephb1,Erbb2,Fcer1g,Fes,Fez1,Fezf1,Foxd1,Gdf7,Hgf,Il1b,Isl1,Lgals9,Lhx4,Lhx9,Lyn,Met,Nckap1l,Neurog2,Nfib,Nrp1,Nrp2,Ntrk1,Pam,Pax6,Pdgfb,Pdgfra,Pik3cd,Pik3cg,Plxna4,Ptprj,Ptpro,Ripor2,S1pr1,Scg2,Sema5a,Shh,Slamf8,Tgfb2,Trpm2,Trpm4
GO Biological Process	GO:1903530	regulation of secretion by cell	64	3.82337e-27	4.91609e-23	7.68138e-25	5.03179	14.1103	71	0.00144662	0.00727907	162	5.39418e-06	0.0693584	0.000428139	1.77237	36.674	65	640	0.0530179	0.101562	region_1216,region_1279,region_1294,region_1306,region_1467,region_1859,region_1889,region_1900,region_1907,region_203,region_2048,region_2116,region_214,region_2242,region_2687,region_2716,region_2783,region_2824,region_3008,region_310,region_3151,region_3296,region_3327,region_3523,region_3554,region_3611,region_379,region_3826,region_3893,region_3936,region_4031,region_4178,region_4191,region_…	Adcy5,Adora2a,Adora3,Agtr1a,Ano1,Bglap2,Bmp6,Cacna1a,Casp4,Ccl3,Ccl5,Cd14,Cd244,Cd300a,Cd300c2,Chrnb2,Epha5,F2r,F2rl1,Fcer1g,Fes,Ffar3,Foxl2,Gal,Gpr27,H2-T23,Hk1,Ica1,Il1a,Il1b,Il1rap,Il4ra,Inhbb,Isl1,Lgals9,Lrp5,Lrrk2,Lyn,Mef2c,Nkx6-1,Nlrp1a,Osm,P2rx7,P2ry12,Pde3b,Rab15,Rasl10b,Ren1,Snca,Sncaip,Sri,Syt12,Syt2,Tgfb2,Tlr2,Tlr4,Tlr6,Tlr9,Tnf,Tnfrsf21,Tnfrsf9,Trpm2,Trpm4,Ttn,Unc93b1
GO Biological Process	GO:0000902	cell morphogenesis	65	4.60512e-27	5.92126e-23	9.10963e-25	4.51567	17.4946	79	0.00179359	0.00809924	71	6.91922e-08	0.000889673	1.25306e-05	1.94828	35.929	70	627	0.0570963	0.111643	region_1046,region_1073,region_1135,region_120,region_1209,region_1294,region_1299,region_138,region_1467,region_150,region_1571,region_158,region_1607,region_1651,region_1685,region_1859,region_1901,region_2116,region_2138,region_2231,region_2268,region_2397,region_2522,region_2542,region_2743,region_279,region_2858,region_293,region_3112,region_3116,region_3159,region_329,region_3296,region_332…	Adora2a,Antxr1,App,Artn,B3gnt2,Cacna1a,Chrnb2,Cnmd,Cnp,Ctnnd2,Cxcl12,Dab2ip,Dact2,Dcc,Dcdc2a,Dst,Efna2,Emx1,Epha2,Epha4,Epha5,Ephb1,Erbb2,Fermt3,Fez1,Fezf1,Fgfr3,Foxd1,Fry,Gdf7,Hgf,Isl1,Itga8,Krt8,Lamc3,Lhx4,Lhx9,Lrrk2,Map6,Mef2c,Mertk,Met,Nes,Neurog2,Nfib,Nptx1,Nr2e1,Nr4a2,Nrp1,Nrp2,Ntrk1,Nyap1,P2rx7,Pam,Pax6,Plxna4,Prox1,Ptpro,Ripor2,Sema5a,Shh,Tal1,Tgfb2,Tlr9,Tnik,Tsku,Tyro3,Unc93b1,Wnt7a,Yap1
GO Biological Process	GO:0002694	regulation of leukocyte activation	66	5.08128e-27	6.53351e-23	9.89926e-25	5.08028	13.7788	70	0.00141263	0.00717654	22	1.14611e-10	1.47367e-06	6.6985e-08	2.39004	26.3594	63	460	0.0513866	0.136957	region_1073,region_1278,region_1285,region_1400,region_1467,region_1676,region_1818,region_1859,region_1889,region_2090,region_212,region_2195,region_2327,region_2537,region_2687,region_2733,region_279,region_3097,region_310,region_3112,region_3296,region_3359,region_3393,region_3456,region_3611,region_379,region_3893,region_4031,region_4178,region_4235,region_4325,region_457,region_4607,region_4…	Adora2a,Adora3,Aif1,App,Ccl2,Ccl5,Cd1d1,Cd244,Cd300a,Cd37,Cd74,Cd83,Cd86,Chrnb2,Dock8,Duxbl1,Duxbl2,Duxbl3,Erbb2,F2rl1,Fam49b,Fcer1g,Fes,Gal,H2-M3,H2-T23,Hlx,Igfbp2,Ikzf1,Ikzf3,Il12b,Il1b,Il1rl2,Il4ra,Itpkb,Ldlr,Lgals9,Loxl3,Lyn,Mef2c,Mertk,Nck2,Nckap1l,Nfatc2,Pde5a,Pla2g5,Ptprc,Ptpre,Ripor2,Shh,Snca,Sox13,Stat5a,Tgfbr2,Tlr4,Tlr6,Tlr9,Tnfrsf21,Tnfsf13b,Tnfsf9,Tyro3,Vsir,Zfp608
GO Biological Process	GO:0051338	regulation of transferase activity	67	6.75471e-27	8.6852e-23	1.2963e-24	4.3353	18.9145	82	0.00193915	0.00840681	415	0.000485099	1	0.0150299	1.48304	49.2234	73	859	0.0595432	0.0849825	region_1073,region_1135,region_1180,region_1294,region_1433,region_1464,region_1576,region_181,region_1859,region_1889,region_2361,region_2424,region_2592,region_2687,region_2716,region_2910,region_2916,region_3177,region_3296,region_330,region_3386,region_34,region_3554,region_3778,region_4031,region_414,region_4191,region_4248,region_4331,region_4404,region_443,region_4545,region_456,region_464…	Adora2a,Agap2,Agtr1a,App,Camk1,Ccl5,Cd300a,Cd74,Cemip,Dab2ip,Dtx3l,Dusp16,Dusp2,Eef1a2,Epha4,Erbb2,Erbb3,F2r,Fgfr3,Fzd8,Gnai2,Gprc5a,Grm4,Hgf,Hhex,Il12b,Il1b,Irgm2,Lgals9,Lrp5,Lrrc15,Lrrc4,Lrrk2,Lyn,Map3k20,Mapk8ip1,Mdfic,Met,Myc,Ncf1,Nckap1l,Nlrc5,P2rx7,Pde5a,Pdgfb,Pdgfra,Pik3cg,Pkia,Prkag2,Prkar2b,Prox1,Ptprc,Ptprj,Rap2c,Rassf2,Sash1,Slamf8,Slc11a1,Snca,Spred2,Tgfa,Tgfb2,Tgfbr2,Tlr4,Tlr6,Tlr9,T…
GO Biological Process	GO:0043547	positive regulation of GTPase activity	68	1.39094e-26	1.78846e-22	2.63009e-24	6.68553	8.07715	54	0.000828086	0.00553619	39	3.78884e-09	4.87169e-05	1.24915e-06	2.43171	20.9729	51	366	0.0415987	0.139344	region_1073,region_1278,region_1314,region_1577,region_158,region_1614,region_1685,region_1793,region_1907,region_1919,region_2188,region_2209,region_2217,region_2308,region_2516,region_2603,region_2651,region_269,region_2712,region_2716,region_286,region_3167,region_3197,region_3370,region_373,region_379,region_3870,region_391,region_3913,region_4068,region_4464,region_5497,region_6417,region_69…	Adrb1,Agap2,Arhgap18,Arhgap20,Arhgap23,Arhgap25,Arhgap30,Arhgap44,Arhgap45,Arhgdig,Arhgef16,Arhgef19,Asap1,Asap2,Ccl12,Ccl2,Ccl3,Ccl4,Ccl5,Chn2,Dab2ip,Depdc1a,Dock8,Epha2,Erbb2,F11r,F2r,F2rl1,Gmip,Icam1,Lims1,Lrrk2,Nckap1l,Nrp1,Ntrk1,Ophn1,Rapgef3,Rasal1,Rgma,Rgs1,Rgs11,Rgs16,Rgs7,Rgs8,Rin3,S1pr1,Tbc1d1,Tbc1d2b,Tbc1d4,Tbc1d8b,Wnt4
GO Biological Process	GO:0045597	positive regulation of cell differentiation	69	2.06853e-26	2.65971e-22	3.85465e-24	3.82129	24.3373	93	0.00249511	0.00953455	121	1.08531e-06	0.0139549	0.00011533	1.68881	51.5155	87	899	0.0709625	0.0967742	region_1035,region_1075,region_1135,region_1154,region_158,region_1685,region_17,region_1818,region_1870,region_1907,region_192,region_2048,region_2057,region_214,region_2188,region_2197,region_2217,region_2231,region_2242,region_2537,region_2687,region_2784,region_286,region_3097,region_3112,region_3265,region_3342,region_3469,region_3611,region_37,region_3806,region_3870,region_3893,region_4031…	Bex1,Bmp6,Camk1,Casp8,Ccl3,Cd1d1,Cd74,Cd83,Cxcl12,Dab2ip,Disc1,Dlx2,Ehd2,Epha3,Epha4,Evi2b,Fam20c,Fes,Fez1,Fezf1,Fgfr3,Flna,Gata4,Gdf7,Golga4,H2-M3,Hgf,Hlx,Hoxa5,Hoxd11,Ikzf1,Il12b,Il1b,Il1rap,Il1rl2,Il4ra,Irx3,Isl1,Itpkb,Kdf1,Kdr,Lgals9,Lims1,Lrp5,Lta,Lyn,Mef2c,Mesp1,Nckap1l,Ndnf,Neurog2,Nfatc2,Nkx6-1,Npnt,Nrp1,Ntrk1,Ntrk2,Ocstamp,Pax6,Pde5a,Prox1,Ptprc,Ramp2,Rasal1,Ret,Rgma,Ripor2,Sema5a,Sfrp4,…
GO Biological Process	GO:0048878	chemical homeostasis	70	2.77805e-26	3.57201e-22	5.10288e-24	4.14948	20.2435	84	0.00207541	0.00861185	562	0.00155606	1	0.0356011	1.41342	53.0627	75	926	0.0611746	0.0809935	region_1013,region_1154,region_1279,region_1294,region_1306,region_1314,region_133,region_1345,region_1579,region_161,region_1614,region_1900,region_1907,region_212,region_214,region_2280,region_2315,region_2361,region_2427,region_2716,region_2739,region_3049,region_306,region_3082,region_3137,region_3271,region_3327,region_3371,region_3572,region_3712,region_373,region_379,region_390,region_4343…	1600014C10Rik,Abcb4,Adcy5,Adra1d,Agtr1a,Ampd2,App,Bglap2,Bmp6,C3ar1,Cacna1a,Calb2,Catsper4,Ccl2,Ccl3,Ccl5,Cldn1,Cxcl2,Cyba,Dbh,Disc1,Dmpk,Erfe,F2r,F2rl1,Ffar3,Gna15,Gpr21,Gpr6,Grin1,Hcrtr1,Hk1,Hpn,Hrc,Icam1,Itpr3,Kdf1,Kdr,Ldlr,Lipg,Lrp5,Lrrk2,Met,Myc,P2rx7,Pax6,Pde3b,Pdgfra,Pik3cg,Plcg2,Pnpla1,Prkcb,Pth1r,Ptprc,Pvalb,Rab20,S1pr1,Sfrp4,Slamf8,Slc11a1,Slc22a17,Slc24a4,Slc29a1,Slc30a3,Slc39a8,Slc4a4…
GO Biological Process	GO:0007167	enzyme linked receptor protein signaling pathway	71	3.13254e-26	4.02781e-22	5.67298e-24	5.31168	12.2372	65	0.00125458	0.00666393	116	8.71966e-07	0.0112117	9.66529e-05	1.9146	31.8605	61	556	0.0497553	0.109712	region_1073,region_1135,region_1147,region_158,region_1676,region_1685,region_181,region_192,region_2057,region_2197,region_2268,region_2361,region_2424,region_2509,region_2733,region_286,region_287,region_2916,region_3097,region_3265,region_3266,region_3469,region_3893,region_4031,region_4060,region_407,region_415,region_4235,region_443,region_4545,region_4677,region_477,region_5102,region_5115,…	Apela,Bex1,Blnk,Bmp6,Ccl2,Dab2ip,Dok1,Dusp15,Efna2,Eif4ebp1,Epha10,Epha2,Epha3,Epha4,Epha5,Ephb1,Erbb2,Erbb3,Fat4,Fes,Fgf5,Fgfr3,Fut8,Gata4,Gdf7,Ghr,Grap,Hck,Hgf,Inhbb,Insrr,Kdr,Lyn,Met,Myo1e,Nck2,Nrp1,Nrp2,Ntrk1,Ntrk2,Pdgfb,Pdgfra,Ptpre,Ptprj,Ptprr,Rassf2,Ret,Rgma,Sh2d6,Sostdc1,Stat5a,Sulf2,Tgfa,Tgfb2,Tgfbr2,Tgif1,Tgif2,Tom1l1,Trf,Vsir,Wnt1
GO Biological Process	GO:0002683	negative regulation of immune system process	72	4.33406e-26	5.57273e-22	7.73991e-24	5.114	13.1013	67	0.00134317	0.00686898	12	5.66351e-12	7.28215e-08	6.06846e-09	2.56274	24.583	63	429	0.0513866	0.146853	region_1073,region_11,region_1259,region_1345,region_1818,region_1859,region_1889,region_1907,region_1922,region_212,region_2231,region_2354,region_2366,region_2537,region_2542,region_2603,region_2733,region_279,region_2948,region_3084,region_3097,region_310,region_3112,region_3296,region_3359,region_3393,region_3769,region_379,region_4031,region_4178,region_4191,region_4545,region_4607,region_46…	A2m,Adora2a,C1qc,Ccl12,Ccl2,Ccl3,Cd300a,Cd37,Cd55,Cd74,Cd86,Cxcl12,Dab2ip,Erbb2,F2rl1,Fcer1g,Gal,H2-M3,H2-T23,Hist1h4k,Hist1h4n,Hlx,Hoxa5,Il12b,Il4ra,Irf4,Itpkb,Klrb1b,Ldlr,Lgals9,Loxl3,Lrch1,Lyn,Mertk,Myc,Nlrc5,Nlrx1,Pde5a,Psmb4,Ptprc,Ptprj,Ripor2,Serping1,Shh,Slamf8,Stat5a,Susd4,Tapbpl,Tgfb2,Ticam2,Tlr6,Tlr9,Tmem176a,Tmem176b,Tmem178,Tnf,Tnfrsf21,Trim30a,Tsc22d3,Tsc22d4,Tyro3,Vsir,Zfp608
GO Biological Process	GO:0051093	negative regulation of developmental process	73	5.6715e-26	7.29242e-22	9.98961e-24	3.76585	24.6957	93	0.00253185	0.00953455	291	0.000108228	1	0.0047821	1.51194	54.8964	83	958	0.0676998	0.0866388	region_1035,region_1073,region_11,region_1135,region_1216,region_1345,region_1375,region_141,region_158,region_174,region_1818,region_1870,region_1901,region_1907,region_210,region_214,region_2197,region_2217,region_2242,region_2537,region_2733,region_286,region_293,region_3084,region_3097,region_3116,region_3121,region_313,region_3265,region_329,region_3359,region_37,region_3870,region_4031,regi…	Adamts1,Adamts7,Adrb1,App,Asap1,Asmt,Bex1,Bhlhe23,C1qc,Ccl2,Ccl3,Cd74,Cd86,Cnmd,Cxcl10,Dab2ip,Dlx2,Epha2,Epha3,Epha4,Ephb1,Erbb2,Fgfr3,Flna,Fstl4,Gal,H2-M3,Hhex,Hist1h4k,Hist1h4n,Hlx,Hoxa5,Hpn,Il4ra,Irx3,Isl1,Itpkb,Lims1,Loxl3,Lrp5,Lyn,Mbnl3,Mesp1,Myc,Nfatc1,Nfatc4,Nfib,Nkx6-1,Nkx6-3,Notch4,Nr2e1,Nrp1,Optc,P2ry12,Pax6,Pde3b,Pdgfb,Rapgef3,Rgma,Sema5a,Shh,Six3,Six4,Skor1,Sostdc1,Stat5a,Tgfb2,Tgfbr2…
GO Biological Process	GO:0043066	negative regulation of apoptotic process	74	8.56066e-26	1.10073e-21	1.48747e-23	3.8811	22.9317	89	0.002351	0.00912446	272	7.78469e-05	1	0.00367999	1.55032	50.3121	78	878	0.0636215	0.0888383	region_1069,region_1075,region_1278,region_1314,region_1375,region_1474,region_158,region_1614,region_1685,region_1765,region_181,region_2057,region_2217,region_2231,region_2366,region_2537,region_2542,region_2603,region_2687,region_2716,region_2784,region_279,region_2808,region_2861,region_293,region_3097,region_3137,region_3159,region_329,region_3296,region_3327,region_3329,region_3393,region_3…	Ackr3,Adora2a,Agap2,Agtr1a,Aif1,Amigo2,Barhl1,Bcl2a1a,Bcl2a1b,Bcl2a1d,Birc3,Cacna1a,Ccl12,Ccl2,Ccl5,Cd74,Cerkl,Chst11,Cntfr,Creb3l1,Cxcl12,Dock8,En2,Erbb3,Evi2b,F2r,Faim2,Fcer1g,Flna,Gata4,Gm29094,Grin1,Hck,Hgf,Hpn,Icam1,Il1b,Isl1,Itpkb,Kdr,Lamtor5,Lhx4,Lims1,Lmna,Lrrk2,Mapk8ip1,Mef2c,Mertk,Myc,Nckap1l,Ndnf,Nes,Nr2e1,Nr4a2,Nrp1,Ntrk1,Ntrk2,Pik3cg,Plaur,Ramp2,Scg2,Sema5a,Sgk3,Shh,Six4,Snca,Stat5a,…
GO Biological Process	GO:0014070	response to organic cyclic compound	75	1.10689e-25	1.42324e-21	1.89765e-23	4.01949	21.147	85	0.00216803	0.00871437	365	0.000309824	1	0.0109143	1.48808	51.7447	77	903	0.0628059	0.0852713	region_102,region_1028,region_1075,region_1101,region_1279,region_1294,region_1306,region_1314,region_1374,region_1467,region_1614,region_1637,region_1685,region_170,region_1859,region_1907,region_2195,region_2242,region_2603,region_2687,region_287,region_293,region_306,region_3097,region_3137,region_3177,region_3266,region_329,region_3296,region_3342,region_341,region_3508,region_3611,region_370…	Abcb4,Adcy5,Adora2a,Agtr1a,Aif1,Aldh1a2,App,Arpc1b,Bmp6,Card9,Casp7,Ccl12,Ccl2,Ccl3,Ccl5,Cd83,Chrnb2,Cldn1,Comt,Cxcl10,Cxcl2,Cyba,Eif4ebp1,Epha5,Ghr,Gjb2,Gldc,Gm13277,Gm13278,Gnal,Grin1,Hid1,Hoxd13,Hsd11b2,Icam1,Igfbp2,Il1b,Isl1,Kcnj8,Lrrk2,Lyn,Mb21d1,Mef2c,Mmp15,Msn,Mtap,Nfatc4,Nfkb1,Nkx6-1,Nr2e1,Nr2f1,Nr4a2,Ntrk1,P2rx5,P2rx7,P2ry12,P2ry13,P2ry6,Pdgfb,Pik3cg,Plin2,Prkar2b,Ramp2,Rapgef3,Ren1,Rftn…
GO Biological Process	GO:0048666	neuron development	76	1.13754e-25	1.46265e-21	1.92454e-23	4.01779	21.1559	85	0.00216895	0.00871437	95	2.69105e-07	0.00346016	3.64227e-05	1.81008	43.0919	78	752	0.0636215	0.103723	region_1046,region_1072,region_1073,region_1088,region_1135,region_1198,region_120,region_1209,region_1299,region_138,region_1467,region_150,region_1571,region_158,region_1607,region_1651,region_1685,region_1859,region_1901,region_1932,region_198,region_20,region_2057,region_2231,region_2268,region_236,region_2522,region_2542,region_2743,region_286,region_293,region_3112,region_3265,region_329,re…	Adora2a,App,Artn,B3gnt2,Bhlhe23,Cacna1a,Chrnb2,Cnp,Crb1,Ctnnd2,Cxcl12,Dab2ip,Dcc,Dcdc2a,Dclk2,Disc1,Dst,Efna2,Emx1,En2,Epha3,Epha4,Epha5,Ephb1,Erbb2,Fat4,Fez1,Fezf1,Fgfr3,Foxd1,Fry,Fzd2,Gdf7,Hoxd10,Hoxd9,Isl1,Jam3,Klhl1,Lama1,Lhx4,Lhx9,Lrrk2,Lyn,Map6,Mef2c,Nck2,Neurog2,Nfib,Nptx1,Nr2e1,Nr4a2,Nrp1,Nrp2,Ntrk1,Ntrk2,Nyap1,Pam,Pax6,Pdgfb,Plp1,Plxna4,Prdm12,Ptprf,Ptpro,Ret,Rgma,Ripor2,Sall3,Sema5a,Shh…
GO Biological Process	GO:0045859	regulation of protein kinase activity	77	1.28461e-25	1.65176e-21	2.14514e-23	4.66578	15.4315	72	0.00158207	0.00738159	242	4.8546e-05	0.624204	0.00257936	1.64539	40.1122	66	700	0.0538336	0.0942857	region_1073,region_1180,region_1294,region_1433,region_1464,region_1576,region_181,region_1859,region_1889,region_2424,region_2592,region_2687,region_2716,region_2910,region_2916,region_3177,region_3296,region_3386,region_34,region_3554,region_3778,region_4031,region_4191,region_4248,region_4331,region_4404,region_443,region_4545,region_456,region_477,region_488,region_5089,region_5277,region_543…	Adora2a,Agap2,Agtr1a,App,Camk1,Ccl5,Cd300a,Cd74,Cemip,Dab2ip,Dusp16,Dusp2,Epha4,Erbb2,Erbb3,F2r,Fzd8,Gnai2,Gprc5a,Grm4,Hgf,Hhex,Il12b,Il1b,Irgm2,Lgals9,Lrp5,Lrrc15,Lrrc4,Lrrk2,Lyn,Map3k20,Mapk8ip1,Mdfic,Met,Ncf1,Nckap1l,P2rx7,Pde5a,Pdgfb,Pik3cg,Pkia,Prkag2,Prkar2b,Prox1,Ptprc,Ptprj,Rap2c,Rassf2,Sash1,Slc11a1,Snca,Spred2,Tgfa,Tgfb2,Tgfbr2,Tlr4,Tlr6,Tlr9,Tnf,Tnfrsf11a,Tnik,Tom1l1,Tpd52l1,Trf,Ttn
GO Biological Process	GO:0002697	regulation of immune effector process	78	2.70648e-25	3.47999e-21	4.46153e-23	6.88886	7.2581	50	0.000744115	0.0051261	47	9.31731e-09	0.000119802	2.54898e-06	2.47048	19.0246	47	332	0.0383361	0.141566	region_1216,region_1259,region_1294,region_1818,region_1859,region_1900,region_1922,region_214,region_2687,region_2733,region_2927,region_3097,region_310,region_330,region_341,region_3508,region_3575,region_3769,region_379,region_3893,region_4031,region_414,region_4178,region_4191,region_457,region_4607,region_4641,region_470,region_5074,region_5088,region_5269,region_5277,region_5615,region_581,…	A2m,Adora3,Apobec3,Ccl2,Ccl5,Cd1d1,Cd244,Cd300a,Cd37,Cd55,Cd74,Dtx3l,F2rl1,Fam49b,Fcer1g,Fes,Ffar3,H2-M3,H2-T23,Hk1,Hlx,Il12b,Il1b,Il4ra,Klrb1b,Lgals9,Loxl3,Lta,Lyn,Mb21d1,Nlrx1,P2rx7,Parp9,Ptprc,Serping1,Slamf8,Stat5a,Susd4,Tgfb2,Tlr2,Tlr4,Tlr9,Tnf,Traf3ip2,Trpm4,Vsir,Zc3hav1
GO Biological Process	GO:0030855	epithelial cell differentiation	79	2.84068e-25	3.65255e-21	4.62348e-23	5.26389	11.9683	63	0.00122702	0.00645889	196	1.53976e-05	0.197982	0.00101011	1.79974	31.1156	56	543	0.045677	0.103131	region_1035,region_1060,region_1135,region_1154,region_1262,region_1314,region_1614,region_1685,region_1901,region_2242,region_236,region_2397,region_2522,region_2712,region_3097,region_3112,region_3116,region_3121,region_3151,region_34,region_3469,region_3611,region_373,region_3735,region_379,region_39,region_3918,region_4102,region_4199,region_4677,region_4765,region_4812,region_5115,region_519…	Ampd2,Basp1,Bfsp1,Bmp6,Cers3,Cldn1,Cnmd,Dact2,Emx1,Epha2,F11r,F2rl1,Fam20c,Fgfr3,Foxl2,Fzd1,Fzd2,Gata4,Gata5,Gdf7,Hhex,Hoxa5,Icam1,Kdf1,Kdr,Lama1,Maf,Mef2c,Mesp1,Met,Msn,Myo1e,Nfib,Nkx6-1,Nkx6-3,Ntrk1,Ophn1,Pax6,Pdgfb,Pou3f1,Prox1,Ptpro,Rap2c,Rapgef3,Ripor2,S1pr1,Six3,Stat5a,Tcf15,Thrb,Tmod1,Upk1a,Wnt1,Wnt4,Wnt7a,Yap1
GO Biological Process	GO:0032880	regulation of protein localization	80	3.79081e-25	4.87422e-21	6.09278e-23	3.66283	25.3902	93	0.00260306	0.00953455	292	0.000113649	1	0.00500443	1.50136	56.6155	85	988	0.0693312	0.0860324	region_1022,region_1069,region_1073,region_1147,region_1216,region_1279,region_1294,region_1306,region_1375,region_1576,region_1577,region_1859,region_1889,region_1900,region_1907,region_1932,region_203,region_2048,region_2116,region_214,region_2190,region_2242,region_2651,region_2687,region_2716,region_2783,region_2824,region_3008,region_310,region_32,region_3296,region_330,region_3532,region_35…	Adcy5,Adora2a,Agtr1a,Ano1,App,Arhgdig,Arhgef16,Bglap2,Bmp6,Cabp1,Camk1,Casp4,Ccl2,Ccl3,Ccl5,Cd14,Cd244,Cd300c2,Cemip,Chrm1,Dab2ip,Dclk2,Dtx3l,Eda,Epha2,Epha5,Erbb2,F2r,F2rl1,Flna,Fzd1,Gpm6b,Gpr27,H2-T23,Hk1,Hps4,Ica1,Il1a,Il1b,Il1rap,Il4ra,Inhbb,Isl1,Lgals9,Lmna,Lrp5,Lrrc15,Lrrk2,Lyn,Mdfic,Msn,Nkd2,Nkx6-1,Nlrp1a,Notch4,P2rx7,Pam,Parp9,Pde3b,Pkia,Plekhm2,Prr5l,Rapgef3,Rbpms,Sema5a,Shh,Six4,Sri,Sul…
GO Biological Process	GO:0032675	regulation of interleukin-6 production	81	5.64012e-25	7.25207e-21	8.95317e-23	12.5868	2.6218	33	0.000268792	0.00338323	28	5.60397e-10	7.20558e-06	2.57342e-07	3.95948	6.81907	27	119	0.0220228	0.226891	region_1216,region_1259,region_1294,region_1859,region_1889,region_2048,region_2116,region_2354,region_2687,region_2716,region_2824,region_306,region_3736,region_379,region_3936,region_4178,region_4191,region_4316,region_5067,region_5590,region_6430,region_6519,region_655,region_721,region_7322,region_7409,region_7641,region_8532,region_8762,region_9034,region_9318,region_9421,region_9499	Card9,Cyba,F2r,F2rl1,Fcer1g,Hgf,Il1a,Il1b,Il1rap,Il1rl2,Isl1,Lgals9,Met,Nckap1l,Nlrx1,Nod1,P2rx7,Ticam2,Tlr2,Tlr4,Tlr6,Tlr9,Tnf,Tnfsf9,Trim30a,Unc93b1,Zbtb20
GO Biological Process	GO:0032496	response to lipopolysaccharide	82	3.04262e-24	3.9122e-20	4.77098e-22	7.03466	6.6812	47	0.00068497	0.00481854	97	3.09323e-07	0.00397728	4.10029e-05	2.3536	17.4201	41	304	0.0334421	0.134868	region_1294,region_1314,region_1374,region_138,region_1614,region_1679,region_1859,region_1907,region_203,region_2603,region_2687,region_2716,region_2743,region_3386,region_3611,region_373,region_375,region_3826,region_4031,region_4086,region_4169,region_4191,region_4773,region_5386,region_5430,region_5620,region_5820,region_6079,region_6160,region_6417,region_6430,region_6668,region_7165,region_…	Adamts13,Ccl12,Ccl2,Ccl3,Ccl5,Cd14,Cd86,Cldn1,Cnp,Comt,Cxcl10,Cxcl16,Cxcl2,Dab2ip,F2r,Gjb2,Icam1,Il10ra,Il12b,Il1b,Irgm2,Kcnj8,Lgals9,Lta,Ltbr,Ly96,Lyn,Mef2c,Nfkb1,P2rx7,Plcg2,Ren1,Slc11a1,Snca,Ticam2,Tlr4,Tlr9,Tnf,Tnfrsf11a,Tnfrsf21,Tnfrsf9
GO Biological Process	GO:0002253	activation of immune response	83	5.80085e-24	7.45873e-20	8.98642e-22	8.61804	4.64143	40	0.000475849	0.00410088	55	1.48306e-08	0.000190691	3.46712e-06	2.88107	12.1483	35	212	0.0285481	0.165094	region_1216,region_1380,region_1859,region_1889,region_203,region_2116,region_2280,region_3038,region_3084,region_3386,region_3508,region_3611,region_3796,region_3936,region_4031,region_4086,region_4169,region_4178,region_4244,region_5088,region_5275,region_5386,region_5615,region_6205,region_6430,region_6564,region_721,region_7349,region_7409,region_7737,region_7981,region_8012,region_8522,regio…	Bcl2a1d,C1qa,C1qb,C1qc,C1rb,C1rl,C1s2,C3ar1,Cd14,Cd55,Cd86,Fcer1g,Irgm2,Lat2,Ly96,Lyn,Mb21d1,Mef2c,Myo1g,Nckap1l,Nfatc2,Pik3ap1,Plcg2,Prkcb,Ptprc,Rftn1,Serping1,Ticam2,Tlr2,Tlr4,Tlr6,Tlr9,Tnfrsf21,Trim12c,Unc93b1
GO Biological Process	GO:0002250	adaptive immune response	84	9.47395e-24	1.21816e-19	1.45019e-21	7.45009	5.90597	44	0.000605492	0.00451097	84	1.45106e-07	0.00186578	2.22116e-05	2.48391	15.7011	39	274	0.0318108	0.142336	region_102,region_1088,region_1314,region_1380,region_1391,region_1512,region_1614,region_1766,region_1889,region_2116,region_214,region_3038,region_3084,region_310,region_33,region_3611,region_373,region_3796,region_3936,region_4031,region_4178,region_4548,region_5088,region_5089,region_5240,region_5275,region_5277,region_5530,region_5820,region_6205,region_6296,region_7349,region_7737,region_79…	C1qa,C1qb,C1qc,C1rb,C1rl,C1s2,Cd244,Cd55,Cd74,Cd86,Clec4a2,Ctsc,Erap1,Fcer1g,Gm13277,Gm13278,H2-Ab1,H2-T23,Icam1,Il12b,Il4ra,Irf4,Jam3,Lat2,Lyn,Mef2c,Myo1g,Pik3cd,Pik3cg,Prkcb,Rftn1,Serping1,Slc11a1,Stx11,Tlr6,Tnfrsf11a,Tnfrsf21,Trpm4,Unc93b1
GO Biological Process	GO:0008285	negative regulation of cell proliferation	85	1.02604e-23	1.31929e-19	1.5521e-21	4.21121	17.5722	74	0.00180153	0.00758663	105	4.7576e-07	0.00611732	5.82602e-05	1.87172	36.3302	68	634	0.0554649	0.107256	region_1069,region_1073,region_11,region_1101,region_1135,region_1154,region_1685,region_1818,region_1901,region_192,region_210,region_2217,region_2340,region_2603,region_2687,region_2716,region_2824,region_293,region_3112,region_3116,region_313,region_329,region_3296,region_3400,region_3523,region_3611,region_3870,region_4001,region_4031,region_415,region_4191,region_4256,region_4285,region_4545…	Adora2a,Adora3,Aif1,Aldh1a2,App,Cbfa2t3,Ccl12,Cd300a,Cd37,Cd9,Cdh13,Cnmd,Cnn1,Comt,Dab2ip,Ddah1,Ephb1,Erbb2,F2r,Fezf1,Fgfr3,Gal,H2-M3,Hist1h2ae,Hist1h2ap,Hpgds,Hpn,Il12b,Il1a,Il1b,Isl1,Kdf1,Lgals9,Lims1,Lmna,Lta,Lyn,Mef2c,Myc,Ndrg2,Nfatc1,Nfib,Nr2e1,Ntrk1,Osm,Ovol1,P3h2,Pax6,Pde5a,Ppp2r3d,Prox1,Pth1r,Ptprj,Ripor2,Sfrp4,Shh,Slfn3,Spint1,Tbrg1,Tes,Tgfb2,Tgfbr2,Tgif1,Tnf,Tnfrsf21,Tnfrsf9,Vsir,Xirp1
GO Biological Process	GO:0010942	positive regulation of cell death	86	1.04433e-23	1.3428e-19	1.5614e-21	4.82737	13.2577	64	0.00135921	0.00656141	309	0.000145835	1	0.00606845	1.6496	34.5538	57	603	0.0464927	0.0945274	region_1101,region_1135,region_1279,region_1294,region_1306,region_1512,region_1685,region_1889,region_1907,region_2046,region_2467,region_2503,region_2547,region_2592,region_2697,region_2716,region_2808,region_2916,region_3137,region_3151,region_3296,region_3329,region_3523,region_3611,region_3733,region_4031,region_4191,region_4235,region_4244,region_4331,region_4332,region_4794,region_4936,reg…	Adora2a,Aldh1a2,Bcl2a1a,Bcl2a1b,Bcl2a1d,Casp8,Ccl3,Ccl5,Ctsc,Dab2ip,Eef1a2,Egln3,F2r,Fgfr3,Foxl2,Gal,Gm29094,Grin1,Hoxa5,Hrk,Htatip2,Ifit2,Il12b,Il20ra,Inhbb,Irf5,Lrrk2,Lta,Ltbr,Lyn,Map3k20,Mef2c,Myc,Nck2,Nfatc4,Nlrp1a,Nod1,Ntrk1,Osgin1,Osm,P2rx7,Pik3cd,Plaur,Ptprc,Rassf2,Rassf6,Ret,Sfrp4,Snca,Tgfb2,Timp3,Tlr4,Tlr6,Tnf,Tnfaip8,Tpd52l1,Trpm2
GO Biological Process	GO:0044087	regulation of cellular component biogenesis	87	1.32081e-23	1.6983e-19	1.95207e-21	4.14295	18.103	75	0.00185596	0.00768915	554	0.00149788	1	0.0347648	1.44364	47.1031	68	822	0.0554649	0.0827251	region_1060,region_1216,region_1279,region_1294,region_1306,region_1314,region_1375,region_1467,region_158,region_1608,region_1614,region_1685,region_182,region_1889,region_2048,region_2057,region_2217,region_2354,region_2427,region_2503,region_2563,region_287,region_3112,region_3137,region_3265,region_3370,region_3386,region_3611,region_37,region_373,region_379,region_3870,region_3893,region_415…	2210013O21Rik,5330417C22Rik,Add2,Amigo2,Antxr1,Arhgap18,Arpc1b,Asap1,Chrnb2,Cldn1,Clstn2,Dab2ip,Dcdc2a,Eif4ebp1,Eln,Epha2,Epha3,Ephb1,Eps8l2,F2rl1,Fes,Fez1,Flna,Gpm6b,Grin1,Has3,Hck,Hrk,Icam1,Ikzf1,Il1rap,Irgm2,Kdr,Lims1,Lrrk2,Macf1,Mef2c,Met,Msn,Nck2,Nckap1l,Nrp1,Ntrk1,Ntrk2,P2rx7,Plek,Prox1,Ptprj,Rapgef3,Ripor2,S1pr1,Sh3pxd2b,Six4,Snca,Sncaip,Tal1,Tlr2,Tlr4,Tlr6,Tmc8,Tmod1,Tnf,Tpbg,Trim30a,Trpm…
GO Biological Process	GO:0032755	positive regulation of interleukin-6 production	88	1.5262e-23	1.96238e-19	2.22998e-21	16.2859	1.65788	27	0.000169969	0.00276809	21	1.10343e-10	1.41879e-06	6.75616e-08	5.11898	4.29773	22	75	0.0179445	0.293333	region_1216,region_1294,region_1859,region_1889,region_2048,region_2116,region_2687,region_2716,region_2824,region_306,region_3736,region_379,region_3936,region_4178,region_4191,region_4316,region_5067,region_5590,region_6430,region_655,region_721,region_7322,region_8762,region_9034,region_9318,region_9421,region_9499	Card9,Cyba,F2r,F2rl1,Fcer1g,Il1a,Il1b,Il1rap,Il1rl2,Isl1,Lgals9,Nod1,P2rx7,Ticam2,Tlr2,Tlr4,Tlr6,Tlr9,Tnf,Tnfsf9,Unc93b1,Zbtb20
GO Biological Process	GO:0042493	response to drug	89	2.17458e-23	2.79607e-19	3.14166e-21	5.93575	8.76047	52	0.000898142	0.00533115	243	5.02383e-05	0.645964	0.00265829	1.88542	22.8066	43	398	0.0350734	0.10804	region_1028,region_1200,region_1216,region_1294,region_1314,region_1614,region_1685,region_181,region_1907,region_2195,region_2242,region_2609,region_2687,region_2884,region_2963,region_2993,region_306,region_3177,region_3296,region_3321,region_3469,region_3611,region_373,region_3736,region_3826,region_402,region_4031,region_4316,region_4641,region_4677,region_4936,region_5002,region_5191,region_…	Abcb4,Adora2a,Agpat2,Card9,Ccl2,Ccl3,Ccl4,Cd86,Cldn1,Comt,Cox8b,Cyba,Emx1,Emx2,Fzd1,Gad1,Gal,Gata4,Hsd11b2,Icam1,Igfbp2,Il1b,Lta,Lyn,Mef2c,Myc,Nckap1l,Nfatc2,Nkx6-1,Ntrk1,P2rx7,Plin2,Prkar2b,Ptgr1,Ren1,Ret,Slamf8,Slc46a1,Snca,Tgfa,Tgfb2,Tgfbr2,Tlr2
GO Biological Process	GO:0072359	circulatory system development	90	2.59378e-23	3.33509e-19	3.70565e-21	3.68801	23.0477	85	0.0023629	0.00871437	277	8.38388e-05	1	0.0038917	1.5468	50.4267	78	880	0.0636215	0.0886364	region_1035,region_1069,region_1073,region_1075,region_1088,region_1101,region_1141,region_1474,region_1547,region_158,region_181,region_1985,region_2057,region_210,region_2231,region_236,region_2361,region_2509,region_2603,region_2783,region_2910,region_313,region_3265,region_3469,region_3554,region_3611,region_37,region_3806,region_415,region_4199,region_443,region_451,region_4545,region_4677,r…	Ackr3,Adamts1,Agtr1a,Aldh1a2,Antxr1,Apela,Casp7,Casp8,Ccl12,Ccl2,Cdh13,Cxcl12,Dab2ip,Epha2,Epha3,Ephb1,Erbb2,Erbb3,Fat4,Flna,Fzd1,Fzd2,Fzd8,Gata4,Hhex,Htatip2,Isl1,Jam3,Kcnj8,Kdr,Lama1,Lmna,Lrp5,Lyl1,Mcam,Mef2c,Mesp1,Met,Myl3,Myo1e,Ndnf,Nfatc1,Nfatc4,Notch4,Nrp1,Nrp2,Ntrk2,Pax6,Pde3b,Pdgfb,Pdgfra,Pik3cg,Plcd1,Plpp3,Prox1,Ptprj,Ramp1,Ramp2,Rapgef3,Rnf213,S1pr1,Scg2,Sema5a,Sh3pxd2b,Shh,Spi1,Spint1,…
GO Biological Process	GO:0022407	regulation of cell-cell adhesion	91	3.66627e-23	4.71409e-19	5.18032e-21	5.02365	11.9435	60	0.00122447	0.00615132	37	3.16261e-09	4.06648e-05	1.09905e-06	2.41988	21.4887	52	375	0.0424144	0.138667	region_1073,region_1278,region_1285,region_1314,region_1397,region_1400,region_1614,region_1818,region_1985,region_2090,region_2195,region_2231,region_2537,region_2687,region_2733,region_3097,region_310,region_3112,region_3296,region_3359,region_3456,region_373,region_4031,region_4191,region_4235,region_4325,region_470,region_5067,region_5115,region_5177,region_5209,region_521,region_5269,region_…	Adora2a,Aif1,Ccl2,Ccl5,Cd1d1,Cd244,Cd300a,Cd74,Cd83,Cd86,Cd9,Cxcl12,Dock8,Duxbl1,Duxbl2,Duxbl3,Erbb2,Fam49b,Fermt3,H2-M3,H2-T23,Hlx,Icam1,Igfbp2,Ikzf1,Il12b,Il1b,Il1rl2,Il4ra,Itpkb,Kif26b,Lgals9,Loxl3,Lyn,Nck2,Nckap1l,Pde5a,Plpp3,Ptprc,Ripor2,Shh,Sox13,Stat5a,Tgfbr2,Tnf,Tnfrsf21,Tnfsf13b,Tnfsf9,Vsir,Wnt1,Wnt4,Zfp608
GO Biological Process	GO:0051047	positive regulation of secretion	92	4.73274e-23	6.08536e-19	6.61452e-21	5.96155	8.55482	51	0.000877058	0.00522862	141	2.45786e-06	0.0316032	0.000224136	2.06894	22.2336	46	388	0.0375204	0.118557	region_1216,region_1279,region_1294,region_1306,region_1467,region_1900,region_1907,region_203,region_2048,region_2116,region_214,region_2242,region_2687,region_2716,region_2783,region_2824,region_306,region_310,region_3151,region_3296,region_3554,region_379,region_3936,region_4178,region_4191,region_4530,region_457,region_5430,region_5582,region_5585,region_5665,region_5939,region_6430,region_68…	Adora2a,Adora3,Agtr1a,Ano1,Bglap2,Bmp6,Casp4,Ccl3,Cd14,Cd244,Cd300c2,Chrnb2,Cyba,F2r,F2rl1,Fcer1g,Foxl2,Gal,Gpr27,H2-T23,Hk1,Il1a,Il1b,Il1rap,Il4ra,Inhbb,Isl1,Lgals9,Nkx6-1,Nlrp1a,P2rx7,P2ry2,Rasl10b,Slc6a1,Snca,Sri,Tac4,Tgfb2,Tlr2,Tlr4,Tnf,Tnfrsf11a,Trpm2,Trpm4,Ttn,Unc93b1
GO Biological Process	GO:0030030	cell projection organization	93	6.00706e-23	7.72388e-19	8.30525e-21	3.51104	25.3486	89	0.00259879	0.00912446	406	0.000436128	1	0.0138122	1.45131	56.5009	82	986	0.0668842	0.0831643	region_1046,region_1072,region_1073,region_1088,region_1135,region_1198,region_120,region_1209,region_1294,region_1299,region_138,region_1467,region_150,region_1571,region_158,region_1607,region_1608,region_1647,region_1651,region_168,region_1685,region_1859,region_1901,region_2231,region_2268,region_2522,region_2542,region_2743,region_2858,region_286,region_293,region_3112,region_3159,region_326…	Adora2a,Aif1,App,Artn,Asap1,B3gnt2,Cacna1a,Cdh13,Chrnb2,Cnp,Ctnnd2,Cxcl12,Dab2ip,Dcc,Dcdc2a,Disc1,Dst,Dzip1,Efna2,Emx1,Epha3,Epha4,Epha5,Ephb1,Erbb2,Fat4,Fez1,Fezf1,Fgfr3,Flna,Fnbp1l,Foxd1,Fry,Gdf7,Isl1,Itga8,Jam3,Klhl1,Lama1,Lhx4,Lhx9,Lrrc6,Lrrk2,Lyn,Map6,Nck2,Nes,Neurog2,Nfib,Nptx1,Nr2e1,Nr4a2,Nrp1,Nrp2,Ntrk1,Nyap1,P2rx7,P2ry12,Pam,Pax6,Pdgfb,Plek,Plp1,Plxna4,Prdm12,Ptprf,Ptpro,Rgma,Ripor2,S1pr…
GO Biological Process	GO:0048534	hematopoietic or lymphoid organ development	94	6.90027e-23	8.87237e-19	9.43869e-21	4.02462	18.6353	75	0.00191053	0.00768915	152	4.08899e-06	0.0525762	0.000345896	1.75273	39.3672	69	687	0.0562806	0.100437	region_102,region_1088,region_1216,region_1279,region_1306,region_1374,region_1375,region_1547,region_1608,region_1685,region_210,region_2268,region_2361,region_2397,region_2537,region_2784,region_279,region_2910,region_3097,region_313,region_3393,region_3575,region_3611,region_375,region_379,region_4031,region_4178,region_4191,region_4244,region_4335,region_4379,region_4382,region_4504,region_46…	Abca15,Add2,Apobec3,App,Artn,Bcl2a1d,Casp8,Cbfa2t3,Cd1d1,Cd74,Cd86,Dact2,Efna2,Epha2,Evi2b,F2rl1,Fam20c,Fcer1g,Fli1,Foxe1,Fut7,Fzd8,Gm13277,Gm13278,Hhex,Ikzf1,Il12b,Irf4,Itpkb,Jam3,Kcp,Kdr,Lrp5,Lrrk1,Lta,Ltbr,Lyl1,Lyn,Mef2c,Mertk,Myo1e,Nckap1l,Nfatc1,Nfkb1,Ntrk1,Ocstamp,Pdgfra,Plcg2,Plek,Ptprc,Ret,Sh3pxd2a,Shh,Six4,Spi1,Stat5a,Tal1,Tgfb2,Tgfbr2,Tlr2,Tnf,Tnfrsf11a,Tnfsf9,Trf,Trpm2,Tspan2,Tyro3,Wnt…
GO Biological Process	GO:0033674	positive regulation of kinase activity	95	7.31812e-23	9.40963e-19	9.90488e-21	5.3207	10.5249	56	0.00107904	0.00574123	192	1.46994e-05	0.189005	0.000984401	1.86193	27.3909	51	478	0.0415987	0.106695	region_1073,region_1135,region_1294,region_181,region_1859,region_1889,region_2361,region_2424,region_2592,region_2687,region_2716,region_2910,region_2916,region_3386,region_4031,region_4191,region_4248,region_4331,region_443,region_456,region_477,region_5089,region_5277,region_5430,region_5735,region_5939,region_6110,region_6163,region_6417,region_6430,region_6519,region_6633,region_7171,region_…	Agap2,Agtr1a,Camk1,Ccl5,Cd74,Cemip,Dab2ip,Eef1a2,Epha4,Erbb2,Erbb3,F2r,Fgfr3,Fzd8,Gnai2,Grm4,Hgf,Il1b,Irgm2,Lgals9,Lrrk2,Lyn,Map3k20,Mdfic,Met,Ncf1,Nckap1l,P2rx7,Pde5a,Pdgfb,Pdgfra,Pik3cg,Prkag2,Prox1,Ptprc,Rassf2,Sash1,Slc11a1,Snca,Tgfa,Tgfb2,Tgfbr2,Tlr4,Tlr6,Tlr9,Tnf,Tnfrsf11a,Tnik,Tom1l1,Tpd52l1,Trf
GO Biological Process	GO:0051347	positive regulation of transferase activity	96	7.38545e-23	9.49621e-19	9.89188e-21	4.95129	12.1181	60	0.00124237	0.00615132	324	0.000159839	1	0.00634325	1.6786	31.574	53	551	0.04323	0.0961888	region_1073,region_1135,region_1294,region_181,region_1859,region_1889,region_2361,region_2424,region_2592,region_2687,region_2716,region_2910,region_2916,region_330,region_3386,region_4031,region_414,region_4191,region_4248,region_4331,region_443,region_456,region_477,region_4936,region_5089,region_5277,region_5430,region_5735,region_5939,region_6110,region_6163,region_6190,region_6417,region_64…	Agap2,Agtr1a,Camk1,Ccl5,Cd74,Cemip,Dab2ip,Dtx3l,Eef1a2,Epha4,Erbb2,Erbb3,F2r,Fgfr3,Fzd8,Gnai2,Grm4,Hgf,Il1b,Irgm2,Lgals9,Lrrk2,Lyn,Map3k20,Mdfic,Met,Myc,Ncf1,Nckap1l,P2rx7,Pde5a,Pdgfb,Pdgfra,Pik3cg,Prkag2,Prox1,Ptprc,Rassf2,Sash1,Slc11a1,Snca,Tgfa,Tgfb2,Tgfbr2,Tlr4,Tlr6,Tlr9,Tnf,Tnfrsf11a,Tnik,Tom1l1,Tpd52l1,Trf
GO Biological Process	GO:0043068	positive regulation of programmed cell death	97	1.30787e-22	1.68165e-18	1.73366e-20	4.89283	12.2628	60	0.00125721	0.00615132	293	0.000113768	1	0.00499257	1.69184	31.9178	54	557	0.0440457	0.0969479	region_1101,region_1135,region_1294,region_1512,region_1685,region_1907,region_2046,region_2467,region_2503,region_2547,region_2592,region_2697,region_2716,region_2808,region_2916,region_3137,region_3151,region_3296,region_3329,region_3523,region_3611,region_3733,region_4031,region_4191,region_4235,region_4244,region_4331,region_4332,region_4794,region_4936,region_5099,region_5240,region_5430,reg…	Adora2a,Aldh1a2,Bcl2a1a,Bcl2a1b,Bcl2a1d,Casp8,Ccl3,Ccl5,Ctsc,Dab2ip,Eef1a2,Egln3,F2r,Fgfr3,Foxl2,Gal,Gm29094,Grin1,Hoxa5,Hrk,Htatip2,Ifit2,Il12b,Il20ra,Inhbb,Irf5,Lrrk2,Lta,Ltbr,Lyn,Map3k20,Mef2c,Myc,Nck2,Nfatc4,Nlrp1a,Nod1,Ntrk1,Osgin1,Osm,P2rx7,Pik3cd,Plaur,Ptprc,Rassf2,Rassf6,Ret,Sfrp4,Snca,Tgfb2,Timp3,Tnf,Tnfaip8,Tpd52l1
GO Biological Process	GO:0002573	myeloid leukocyte differentiation	98	1.30812e-22	1.68199e-18	1.71631e-20	12.337	2.43172	30	0.000249305	0.00307566	36	2.84815e-09	3.66215e-05	1.01726e-06	3.93042	6.36064	25	111	0.0203915	0.225225	region_1216,region_210,region_2268,region_313,region_3611,region_379,region_4191,region_4379,region_4382,region_4698,region_4740,region_4765,region_488,region_5067,region_5590,region_5852,region_6110,region_6160,region_6296,region_6309,region_6625,region_6734,region_6878,region_721,region_7342,region_7364,region_8199,region_8522,region_8770,region_9416	App,Casp8,Cbfa2t3,Cd86,Efna2,Epha2,F2rl1,Fam20c,Hhex,Irf4,Lrrk1,Ltbr,Mef2c,Nfatc1,Ocstamp,Sh3pxd2a,Spi1,Tal1,Tgfbr2,Tlr2,Tnf,Tnfrsf11a,Tnfsf9,Trf,Tspan2
GO Biological Process	GO:0080135	regulation of cellular response to stress	99	1.73846e-22	2.23531e-18	2.25789e-20	4.86391	12.3358	60	0.00126469	0.00615132	551	0.00139192	1	0.0324816	1.55259	32.2043	50	562	0.040783	0.088968	region_1180,region_1279,region_1306,region_1577,region_1859,region_1889,region_2231,region_2592,region_2651,region_2687,region_286,region_2910,region_2916,region_330,region_3469,region_3508,region_3736,region_3778,region_379,region_3817,region_4031,region_407,region_414,region_415,region_4191,region_4199,region_4235,region_4281,region_4316,region_4331,region_456,region_4677,region_488,region_4936…	Ackr3,App,Card9,Cd74,Creb3l1,Cxcl12,Dab2ip,Ddah1,Dtx3l,Dusp15,Epha4,Ephb1,F2rl1,Fut8,Fzd1,Fzd8,Gata4,Hgf,Il1b,Lrrk2,Ltbr,Lyn,Map3k20,Mapk8ip1,Mb21d1,Mdfic,Met,Myc,Ncf1,Nck2,Nod1,Parp9,Pdia2,Ptprf,Rassf2,Rgma,Sash1,Spred2,Tgfb2,Tlr4,Tlr6,Tlr9,Tnf,Tnfrsf11a,Tnik,Tpd52l1,Trf,Trpm2,Wnt1,Wnt7a
GO Biological Process	GO:0051960	regulation of nervous system development	100	1.75896e-22	2.26167e-18	2.26167e-20	3.71487	21.8043	81	0.00223542	0.00830428	341	0.000221986	1	0.00837037	1.52856	47.1031	72	822	0.0587276	0.0875912	region_1135,region_1209,region_1216,region_1375,region_141,region_1467,region_158,region_1607,region_1685,region_17,region_1870,region_192,region_2048,region_2057,region_2188,region_2197,region_2242,region_236,region_269,region_286,region_293,region_3122,region_3137,region_3265,region_329,region_3327,region_3611,region_37,region_3806,region_3893,region_4031,region_415,region_4199,region_420,regio…	Amigo2,App,Arhgap44,Asap1,Bex1,Bmp6,Cacna1a,Camk1,Chrnb2,Clstn2,Dab2ip,Disc1,Dlx2,Dusp15,Emx1,Epha3,Epha4,Ephb1,Fes,Fez1,Fezf1,Fgfr3,Flna,Fstl4,Fzd1,Fzd2,Gdf7,Golga4,Grin1,Hgf,Il1rap,Irx3,Isl1,Lrrk2,Lta,Lyn,Mef2c,Mgll,Ndnf,Neurog2,Nfatc4,Nkx6-1,Nr2e1,Nrp1,Ntrk1,Ntrk2,P2ry12,Pax6,Plxna4,Prox1,Ptprf,Rasal1,Ret,Rgma,Sema5a,Shh,Six3,Six4,Snca,Spint1,Syt2,Tgif1,Tgif2,Tlr2,Tnfrsf21,Tnik,Tpbg,Ust,Wnt7a,…
GO Biological Process	GO:0032844	regulation of homeostatic process	101	2.28992e-22	2.94438e-18	2.91522e-20	5.1893	10.7914	56	0.00110636	0.00574123	255	5.99003e-05	0.770198	0.00302038	1.77709	28.1358	50	491	0.040783	0.101833	region_1069,region_1279,region_1294,region_1306,region_1512,region_1907,region_2046,region_212,region_214,region_2366,region_2537,region_2542,region_2687,region_2716,region_2783,region_306,region_3097,region_3296,region_4003,region_4031,region_4178,region_4191,region_4343,region_4367,region_4773,region_4936,region_5240,region_5277,region_5386,region_5392,region_5430,region_5771,region_5864,region…	Adcy5,Adora2a,Ano1,Catsper4,Ccl3,Cd74,Cemip,Comt,Cxcl10,Cyba,Epha5,F2r,Fcer1g,Fhl1,Gpr27,Hoxa5,Hrc,Il1b,Il20ra,Itpkb,Itpr3,Kdr,Ldlr,Lmna,Lrp5,Lrrk2,Lyn,Mc4r,Myc,Nckap1l,P2rx7,Pik3cd,Plcg2,Ptpn3,Ptprc,S1pr1,Slc30a3,Snca,Spi1,Sri,Stat5a,Tal1,Tgfb2,Tnf,Tnfrsf11a,Trf,Trpm2,Trpm4,Tsc22d3,Tsc22d4
GO Biological Process	GO:0031175	neuron projection development	102	2.35369e-22	3.02637e-18	2.96703e-20	4.23501	16.2928	69	0.00167037	0.00707402	119	1.06981e-06	0.0137556	0.000115593	1.89155	32.7774	62	572	0.050571	0.108392	region_1046,region_1072,region_1073,region_1088,region_1135,region_1198,region_120,region_1209,region_1299,region_138,region_1467,region_150,region_1571,region_158,region_1607,region_1651,region_1685,region_1859,region_1901,region_2231,region_2268,region_2522,region_2542,region_2743,region_286,region_293,region_3265,region_329,region_3296,region_3327,region_3739,region_4031,region_415,region_4199…	Adora2a,App,Artn,B3gnt2,Cacna1a,Chrnb2,Cnp,Ctnnd2,Cxcl12,Dab2ip,Dcc,Dcdc2a,Dst,Efna2,Emx1,Epha3,Epha4,Epha5,Ephb1,Erbb2,Fez1,Fezf1,Fgfr3,Foxd1,Fry,Gdf7,Isl1,Jam3,Klhl1,Lama1,Lhx4,Lhx9,Lrrk2,Lyn,Map6,Nck2,Neurog2,Nfib,Nptx1,Nr2e1,Nr4a2,Nrp1,Nrp2,Ntrk1,Nyap1,Pam,Pax6,Plp1,Plxna4,Prdm12,Ptprf,Ptpro,Rgma,Sema5a,Shh,Stmn3,Tgfb2,Tlr9,Tnik,Tsku,Tspan2,Wnt7a
GO Biological Process	GO:0007610	behavior	103	2.62497e-22	3.37518e-18	3.27688e-20	4.46397	14.561	65	0.00149283	0.00666393	498	0.000850322	1	0.0219547	1.55058	35.4706	55	619	0.0448613	0.088853	region_1060,region_1072,region_1216,region_133,region_138,region_1467,region_1685,region_1765,region_188,region_2057,region_212,region_231,region_2743,region_2858,region_293,region_2993,region_3108,region_3137,region_3177,region_329,region_3296,region_3327,region_3342,region_3523,region_3561,region_3611,region_3826,region_402,region_4072,region_4156,region_4343,region_4418,region_4628,region_4812…	Adam22,Adcy5,Adora2a,Aff2,Agtr1a,App,Cacna1a,Chrnb2,Chst10,Cnp,Cntfr,Comt,Ctnnd2,Dbh,Dcdc2a,Dmrt3,Epha4,Gad1,Gal,Glra1,Grin1,Grm4,Grm7,Hcrtr1,Hoxd10,Hoxd9,Itga8,Itpr3,Klhl1,Ldlr,Lrrk2,Mc4r,Mef2c,Met,Nr2e1,Nr4a2,Ntrk1,Ntrk2,Osm,Pax5,Ppy,Prkar2b,Ren1,Rnf180,Six3,Slc6a1,Snca,Sobp,Tal1,Tcf15,Thrb,Tifab,Tlr2,Tmod1,Unc79
GO Biological Process	GO:0019725	cellular homeostasis	104	4.03564e-22	5.18903e-18	4.98945e-20	4.30461	15.5647	67	0.00159573	0.00686898	736	0.00420978	1	0.0735452	1.42558	40.6852	58	710	0.0473083	0.0816901	region_1013,region_1279,region_1294,region_1306,region_1314,region_133,region_1345,region_1577,region_1614,region_1900,region_1907,region_214,region_2280,region_2315,region_2361,region_2651,region_2716,region_2739,region_2752,region_3049,region_306,region_3082,region_3137,region_3271,region_3327,region_3371,region_3393,region_3572,region_3712,region_373,region_379,region_4343,region_4367,region_4…	1600014C10Rik,Adcy5,Adra1d,Agtr1a,App,Bmp6,C3ar1,Cacna1a,Calb2,Catsper4,Ccl2,Ccl3,Ccl5,Cxcl2,Cyba,Disc1,Dmpk,Erfe,F2r,F2rl1,Gna15,Gpr6,Grin1,Hcrtr1,Hk1,Hrc,Icam1,Itpr3,Lrrk2,Myc,Nme9,P2rx7,Pdgfra,Pdia2,Pik3cg,Plcg2,Prkcb,Pth1r,Ptprc,Pvalb,Rab20,S1pr1,Slamf8,Slc11a1,Slc24a4,Slc29a1,Slc30a3,Slc39a8,Slc4a4,Tac4,Tmem178,Tmx3,Trf,Trpm2,Trpm4,Trpm8,Txndc2,Tyro3
GO Biological Process	GO:0002520	immune system development	105	4.09692e-22	5.26782e-18	5.01698e-20	3.89972	19.2321	75	0.00197172	0.00768915	194	1.48842e-05	0.191381	0.000986499	1.68645	40.9144	69	714	0.0562806	0.0966387	region_102,region_1088,region_1216,region_1279,region_1306,region_1374,region_1375,region_1547,region_1608,region_1685,region_210,region_2268,region_2361,region_2397,region_2537,region_2784,region_279,region_2910,region_3097,region_313,region_3393,region_3575,region_3611,region_375,region_379,region_4031,region_4178,region_4191,region_4244,region_4335,region_4379,region_4382,region_4504,region_46…	Abca15,Add2,Apobec3,App,Artn,Bcl2a1d,Casp8,Cbfa2t3,Cd1d1,Cd74,Cd86,Dact2,Efna2,Epha2,Evi2b,F2rl1,Fam20c,Fcer1g,Fli1,Foxe1,Fut7,Fzd8,Gm13277,Gm13278,Hhex,Ikzf1,Il12b,Irf4,Itpkb,Jam3,Kcp,Kdr,Lrp5,Lrrk1,Lta,Ltbr,Lyl1,Lyn,Mef2c,Mertk,Myo1e,Nckap1l,Nfatc1,Nfkb1,Ntrk1,Ocstamp,Pdgfra,Plcg2,Plek,Ptprc,Ret,Sh3pxd2a,Shh,Six4,Spi1,Stat5a,Tal1,Tgfb2,Tgfbr2,Tlr2,Tnf,Tnfrsf11a,Tnfsf9,Trf,Trpm2,Tspan2,Tyro3,Wnt…
GO Biological Process	GO:0072507	divalent inorganic cation homeostasis	106	5.41e-22	6.95618e-18	6.56244e-20	5.88874	8.32097	49	0.000853083	0.00502358	170	6.95652e-06	0.089447	0.000526159	2.02598	21.7179	44	379	0.0358891	0.116095	region_1013,region_1279,region_1294,region_1306,region_133,region_1345,region_161,region_1907,region_214,region_2280,region_2361,region_2427,region_2716,region_2739,region_3082,region_3137,region_3271,region_3327,region_3371,region_3572,region_3712,region_379,region_4343,region_4367,region_4418,region_488,region_5089,region_5386,region_5392,region_5771,region_6089,region_6417,region_6432,region_6…	1600014C10Rik,Adcy5,Adra1d,Agtr1a,App,C3ar1,Cacna1a,Calb2,Catsper4,Ccl2,Ccl3,Ccl5,Cxcl2,Disc1,Dmpk,F2r,F2rl1,Gna15,Gpr6,Grin1,Hcrtr1,Hrc,Itpr3,Kdr,P2rx7,Pdgfra,Pik3cg,Plcg2,Prkcb,Pth1r,Ptprc,Pvalb,S1pr1,Slc11a1,Slc24a4,Slc30a3,Slc39a8,Tac4,Tmc8,Tmem178,Tmtc2,Trpm2,Trpm4,Trpm8
GO Biological Process	GO:0070372	regulation of ERK1 and ERK2 cascade	107	6.33075e-22	8.14007e-18	7.60755e-20	7.07348	5.93767	42	0.000608742	0.00430593	138	2.09898e-06	0.0269887	0.00019557	2.32681	15.4718	36	270	0.0293638	0.133333	region_1073,region_1135,region_1216,region_1314,region_133,region_158,region_1614,region_1685,region_1907,region_2327,region_2361,region_2467,region_2478,region_2603,region_2687,region_2716,region_3440,region_3469,region_373,region_379,region_4031,region_415,region_4677,region_488,region_5277,region_6089,region_6417,region_6430,region_655,region_6838,region_6916,region_7166,region_721,region_7342…	Ackr3,App,Ccl12,Ccl2,Ccl3,Ccl4,Ccl5,Cd74,Dab2ip,Epha2,Ephb1,Erbb2,F2r,F2rl1,Fgfr3,Gata4,Gm14698,Hcrtr1,Icam1,Il1b,Kdr,Lyn,Ndrg2,Nod1,Npnt,Nrp1,Ntrk1,Pdgfb,Pdgfra,Pla2g5,Ptprr,St5,Timp3,Tlr2,Tlr4,Tnfrsf11a
GO Biological Process	GO:0098609	cell-cell adhesion	108	8.71236e-22	1.12023e-17	1.03725e-19	3.98195	18.0816	72	0.00185376	0.00738159	122	1.17437e-06	0.0151001	0.000123771	1.81617	37.992	69	663	0.0562806	0.104072	region_102,region_1088,region_1123,region_1278,region_1294,region_1314,region_1391,region_1608,region_1614,region_1771,region_1818,region_1985,region_2011,region_217,region_2217,region_2231,region_2361,region_2537,region_2687,region_2817,region_2910,region_3097,region_310,region_3193,region_3203,region_3393,region_37,region_373,region_379,region_3870,region_395,region_4178,region_4191,region_4244…	Add2,Amigo2,Apbb1ip,Bcl2a1d,Ccl5,Cd151,Cd1d1,Cd74,Cd86,Cdh13,Cdh15,Cldn1,Cldn10,Clstn2,Ctnnd2,Cxcl12,Dock8,Elf4,F2rl1,Fat1,Fat4,Fcer1g,Fermt3,Flna,Fut7,Fzd8,Gm13277,Gm13278,H2-M3,H2-T23,Icam1,Ikzf1,Il12b,Il1b,Irf4,Itpkb,Jam3,Lgals9,Lims1,Mcam,Megf10,Msn,Npnt,P2rx7,P2ry12,Pcdh10,Pcdhac1,Pcdhga10,Pcdhga11,Pcdhga9,Pcdhgb5,Pcdhgc5,Pdgfra,Perp,Pik3cg,Plek,Plpp3,Ptprc,Ret,Shh,Slc11a1,Stat5a,Stx11,Tgfb2…
GO Biological Process	GO:0000904	cell morphogenesis involved in differentiation	109	1.02122e-21	1.31309e-17	1.20467e-19	4.40827	14.5182	64	0.00148843	0.00656141	86	1.50155e-07	0.00193069	2.24499e-05	2.05724	28.1931	58	492	0.0473083	0.117886	region_1073,region_1135,region_120,region_1209,region_1299,region_138,region_1467,region_150,region_1571,region_158,region_1607,region_1651,region_1685,region_1859,region_1901,region_2138,region_2231,region_2268,region_2397,region_2522,region_2743,region_279,region_2858,region_293,region_3112,region_3116,region_329,region_3327,region_3393,region_3611,region_3739,region_415,region_4199,region_420,…	Antxr1,App,Artn,B3gnt2,Cacna1a,Chrnb2,Cnmd,Cnp,Ctnnd2,Cxcl12,Dact2,Dcc,Dcdc2a,Dst,Efna2,Epha2,Epha4,Epha5,Ephb1,Erbb2,Fermt3,Fez1,Fezf1,Fgfr3,Foxd1,Gdf7,Isl1,Itga8,Krt8,Lamc3,Lhx4,Lhx9,Map6,Mef2c,Mertk,Met,Neurog2,Nfib,Nptx1,Nr2e1,Nr4a2,Nrp1,Nrp2,Ntrk1,Pam,Pax6,Plxna4,Prox1,Ptpro,Ripor2,Sema5a,Shh,Tal1,Tgfb2,Tlr9,Tsku,Tyro3,Wnt7a
GO Biological Process	GO:0071900	regulation of protein serine/threonine kinase activity	110	1.09928e-21	1.41345e-17	1.28496e-19	5.41905	9.59578	52	0.000983779	0.00533115	215	2.42276e-05	0.311518	0.00144892	1.88119	24.9842	47	436	0.0383361	0.107798	region_1073,region_1180,region_1294,region_1464,region_181,region_1859,region_1889,region_2592,region_2687,region_2716,region_2910,region_3177,region_3386,region_3778,region_4031,region_4191,region_4248,region_4331,region_4545,region_456,region_5089,region_5277,region_5430,region_5735,region_5852,region_5914,region_5972,region_611,region_6163,region_6430,region_6519,region_6633,region_6853,region…	Camk1,Cd300a,Cd74,Cemip,Dab2ip,Dusp16,Dusp2,Epha4,Erbb2,F2r,Fzd8,Gnai2,Grm4,Hgf,Hhex,Il1b,Irgm2,Lgals9,Lrp5,Lrrk2,Lyn,Map3k20,Mapk8ip1,Mdfic,Met,P2rx7,Pde5a,Pdgfb,Pik3cg,Pkia,Prkag2,Prkar2b,Prox1,Ptprc,Ptprj,Sash1,Snca,Spred2,Tgfa,Tlr4,Tlr6,Tlr9,Tnf,Tnfrsf11a,Tnik,Tpd52l1,Trf
GO Biological Process	GO:0008284	positive regulation of cell proliferation	111	1.19356e-21	1.53469e-17	1.3826e-19	3.56277	23.0158	82	0.00235963	0.00840681	446	0.000600604	1	0.0173152	1.46748	50.4267	74	880	0.0603589	0.0840909	region_1073,region_1101,region_1135,region_1285,region_1467,region_1474,region_1626,region_1765,region_181,region_1859,region_192,region_2057,region_2090,region_214,region_2195,region_2197,region_2361,region_2687,region_2716,region_293,region_306,region_3097,region_310,region_3159,region_329,region_3469,region_3523,region_3611,region_4031,region_4191,region_4199,region_4235,region_4248,region_438…	Agap2,Agtr1a,Aif1,Aldh1a2,Bex1,Bmp6,Ccl2,Ccl5,Cd1d1,Cd244,Cd74,Cd86,Cdca7l,Cdh13,Chrnb2,Cntfr,Cxcl10,Cyba,Dab2ip,Disc1,Erbb2,F2r,Fgf5,Fgfr3,Gata4,Gnai2,H2-T23,Hck,Hgf,Hlx,Hpn,Igfbp2,Il12b,Il1b,Isl1,Kdr,Lrp5,Lta,Lyn,Mef2c,Myc,Nck2,Nckap1l,Nes,Nfatc2,Nr2e1,Ntrk2,Ocstamp,Osm,Pax6,Pdgfb,Pdgfra,Prox1,Pth1r,Ptprc,S1pr1,Scg2,Sema5a,Shh,Stat5a,Tgfa,Tgfb2,Tgfbr2,Tgif1,Tlr4,Tlr9,Tmem119,Tnf,Tnfsf13b,Tnfsf9…
GO Biological Process	GO:0002443	leukocyte mediated immunity	112	1.45339e-21	1.86876e-17	1.66854e-19	9.69671	3.40321	33	0.000348905	0.00338323	67	4.94154e-08	0.000635383	9.48332e-06	3.17292	8.82468	28	154	0.0228385	0.181818	region_1314,region_1380,region_1391,region_1586,region_1614,region_1766,region_1907,region_3038,region_3084,region_373,region_3796,region_4031,region_4178,region_4548,region_457,region_5088,region_5275,region_5277,region_5530,region_5560,region_5820,region_5914,region_6205,region_7349,region_7467,region_7737,region_8012,region_86,region_8717,region_9107,region_9108,region_9157,region_9549	Adora3,C1qa,C1qb,C1qc,C1rb,C1rl,C1s2,Ccl3,Cd300a,Cd55,Cd74,Ctsc,Dbh,Fcer1g,H2-Ab1,Icam1,Il12b,Il4ra,Lat2,Lyn,Myo1f,Myo1g,Ncf1,Rftn1,Serping1,Slc11a1,Stx11,Tac4
GO Biological Process	GO:0055082	cellular chemical homeostasis	113	1.70062e-21	2.18666e-17	1.93509e-19	4.56388	13.3658	61	0.00137029	0.00625385	582	0.00171144	1	0.0378105	1.51624	34.9549	53	610	0.04323	0.0868852	region_1013,region_1279,region_1294,region_1306,region_1314,region_133,region_1345,region_1614,region_1900,region_1907,region_214,region_2280,region_2315,region_2361,region_2716,region_2739,region_3049,region_306,region_3082,region_3137,region_3271,region_3327,region_3371,region_3572,region_3712,region_373,region_379,region_4343,region_4367,region_4418,region_4641,region_488,region_4936,region_50…	1600014C10Rik,Adcy5,Adra1d,Agtr1a,App,Bmp6,C3ar1,Cacna1a,Calb2,Catsper4,Ccl2,Ccl3,Ccl5,Cxcl2,Cyba,Disc1,Dmpk,Erfe,F2r,F2rl1,Gna15,Gpr6,Grin1,Hcrtr1,Hk1,Hrc,Icam1,Itpr3,Lrrk2,Myc,P2rx7,Pdgfra,Pik3cg,Plcg2,Prkcb,Pth1r,Ptprc,Pvalb,Rab20,S1pr1,Slamf8,Slc11a1,Slc24a4,Slc29a1,Slc30a3,Slc39a8,Slc4a4,Tac4,Tmem178,Trf,Trpm2,Trpm4,Trpm8
GO Biological Process	GO:0007420	brain development	114	2.65668e-21	3.41595e-17	2.99645e-19	3.77145	19.8863	75	0.00203878	0.00768915	299	0.000121947	1	0.00524414	1.58862	42.1751	67	736	0.0546493	0.0910326	region_1072,region_1101,region_1135,region_1209,region_1262,region_138,region_1467,region_1571,region_158,region_1607,region_1637,region_1647,region_1870,region_1901,region_1932,region_20,region_2057,region_2231,region_2268,region_2609,region_2743,region_2858,region_293,region_3137,region_3159,region_329,region_3327,region_3393,region_3554,region_39,region_4199,region_420,region_4418,region_4740,…	Abcb4,Aldh1a2,App,Barhl1,Basp1,Cacna1a,Casp4,Cd9,Chrnb2,Cnp,Cxcl12,Dab2ip,Dclk2,Disc1,Dlx2,Efna2,Emx1,Emx2,En2,Epha5,Faim2,Fat4,Fez1,Fezf1,Fgfr3,Gdf7,Grin1,Hhex,Ikzf1,Ina,Isl1,Itga8,Klhl1,Lrrk2,Met,Ndrg2,Nes,Neurog2,Nfib,Nr2e1,Nr2f1,Nr4a2,Nrp1,Nrp2,Ntrk2,Otx1,Pax5,Pax6,Plp1,Plxna4,Pou3f1,Prox1,S1pr1,Sall3,Sema5a,Shh,Six3,Spef2,Tgfbr2,Tsku,Tspan2,Ttn,Tyro3,Wnt1,Wnt4,Wnt7a,Zic5
GO Biological Process	GO:0048729	tissue morphogenesis	115	2.68399e-21	3.45108e-17	3.00093e-19	3.90008	18.4612	72	0.00189268	0.00738159	136	1.95538e-06	0.0251422	0.000184869	1.83695	34.8403	64	608	0.0522023	0.105263	region_1035,region_1101,region_1135,region_1154,region_1397,region_150,region_158,region_192,region_210,region_2231,region_236,region_2712,region_2858,region_286,region_3097,region_313,region_3342,region_3469,region_3554,region_3611,region_37,region_4199,region_451,region_4677,region_4936,region_5099,region_5115,region_5177,region_5232,region_528,region_5534,region_5723,region_5735,region_5852,re…	Aldh1a2,Artn,Casp8,Cxcl12,Epha2,Epha4,Fat4,Fgfr3,Flna,Foxd1,Foxe1,Fzd1,Fzd2,Gata4,Gdf7,Hhex,Hoxa5,Hoxd11,Hoxd13,Irx3,Isl1,Itga8,Kdf1,Kdr,Kif26b,Lama1,Lgr5,Lrp5,Macf1,Mef2c,Mesp1,Met,Msn,Myc,Myl3,Nfatc1,Nfatc4,Notch4,Npnt,Nrp1,Nrp2,Ophn1,Pdgfb,Prox1,Ret,Rgma,S1pr1,Sema5a,Shh,Six3,Sostdc1,Spint1,Stat5a,Tal1,Tcf15,Tgfb2,Tgfbr2,Tgif1,Ttn,Wnt1,Wnt4,Wnt7a,Yap1,Zic5
GO Biological Process	GO:1903037	regulation of leukocyte cell-cell adhesion	116	2.76053e-21	3.54948e-17	3.0599e-19	5.19731	10.1976	53	0.00104548	0.00543367	33	2.0352e-09	2.61685e-05	7.92986e-07	2.65303	16.9617	45	296	0.0367047	0.152027	region_1073,region_1278,region_1285,region_1314,region_1400,region_1614,region_1818,region_2090,region_2195,region_2231,region_2537,region_2687,region_2733,region_3097,region_310,region_3112,region_3296,region_3359,region_3456,region_373,region_4191,region_4235,region_4325,region_470,region_5067,region_5177,region_5209,region_5269,region_5277,region_5509,region_5590,region_5639,region_581,region_…	Adora2a,Aif1,Ccl2,Ccl5,Cd1d1,Cd244,Cd300a,Cd74,Cd83,Cd86,Cxcl12,Dock8,Duxbl1,Duxbl2,Duxbl3,Erbb2,Fam49b,H2-M3,H2-T23,Hlx,Icam1,Igfbp2,Ikzf1,Il12b,Il1b,Il1rl2,Il4ra,Itpkb,Lgals9,Loxl3,Nck2,Nckap1l,Pde5a,Ptprc,Ripor2,Shh,Sox13,Stat5a,Tgfbr2,Tnf,Tnfrsf21,Tnfsf13b,Tnfsf9,Vsir,Zfp608
GO Biological Process	GO:0051249	regulation of lymphocyte activation	117	2.78336e-21	3.57884e-17	3.05884e-19	4.74195	12.2312	58	0.00125397	0.00594628	50	1.12095e-08	0.000144132	2.88264e-06	2.33279	22.2909	52	389	0.0424144	0.133676	region_1073,region_1278,region_1285,region_1400,region_1467,region_1818,region_1859,region_2090,region_2195,region_2537,region_2687,region_2733,region_279,region_3097,region_310,region_3112,region_3296,region_3359,region_3393,region_3456,region_3611,region_4031,region_4235,region_4325,region_470,region_5067,region_5177,region_5209,region_5269,region_5277,region_5436,region_5509,region_5590,region…	Adora2a,Aif1,Ccl2,Ccl5,Cd1d1,Cd244,Cd300a,Cd74,Cd83,Cd86,Chrnb2,Dock8,Duxbl1,Duxbl2,Duxbl3,Erbb2,Fam49b,Gal,H2-M3,H2-T23,Hlx,Igfbp2,Ikzf1,Ikzf3,Il12b,Il1b,Il1rl2,Il4ra,Itpkb,Lgals9,Loxl3,Lyn,Mef2c,Mertk,Nck2,Nckap1l,Nfatc2,Pde5a,Ptprc,Ripor2,Shh,Sox13,Stat5a,Tgfbr2,Tlr4,Tlr9,Tnfrsf21,Tnfsf13b,Tnfsf9,Tyro3,Vsir,Zfp608
GO Biological Process	GO:0060322	head development	118	2.85373e-21	3.66933e-17	3.1096e-19	3.68757	20.881	77	0.00214076	0.0078942	347	0.00023346	1	0.0086508	1.54177	44.7537	69	781	0.0562806	0.0883483	region_1072,region_1101,region_1135,region_1209,region_1262,region_138,region_1467,region_1571,region_158,region_1607,region_1637,region_1647,region_1870,region_1901,region_1932,region_20,region_2057,region_2231,region_2268,region_2361,region_2609,region_2743,region_2858,region_293,region_3137,region_3159,region_329,region_3327,region_3393,region_3554,region_39,region_4199,region_420,region_4418,…	Abcb4,Aldh1a2,App,Barhl1,Basp1,Cacna1a,Casp4,Cd9,Chrnb2,Cnp,Cxcl12,Dab2ip,Dclk2,Disc1,Dlx2,Efna2,Emx1,Emx2,En2,Epha5,Faim2,Fat4,Fez1,Fezf1,Fgfr3,Gdf7,Grin1,Hhex,Ikzf1,Ina,Isl1,Itga8,Klhl1,Lrrk2,Met,Ndrg2,Nes,Neurog2,Nfib,Nr2e1,Nr2f1,Nr4a2,Nrp1,Nrp2,Ntrk2,Otx1,Pax5,Pax6,Pdgfra,Plp1,Plxna4,Pou3f1,Prox1,S1pr1,Sall3,Sema5a,Shh,Six3,Spef2,Tgfb2,Tgfbr2,Tsku,Tspan2,Ttn,Tyro3,Wnt1,Wnt4,Wnt7a,Zic5
GO Biological Process	GO:0030003	cellular cation homeostasis	119	3.35576e-21	4.31483e-17	3.62591e-19	4.97974	11.0448	55	0.00113233	0.00563871	338	0.00021686	1	0.00824965	1.69663	28.8808	49	504	0.0399674	0.0972222	region_1013,region_1279,region_1294,region_1306,region_133,region_1345,region_1907,region_214,region_2280,region_2361,region_2716,region_2739,region_3049,region_3082,region_3137,region_3271,region_3327,region_3371,region_3572,region_3712,region_379,region_4343,region_4367,region_4418,region_4641,region_488,region_4936,region_5089,region_5386,region_5392,region_5715,region_5771,region_6089,region_…	1600014C10Rik,Adcy5,Adra1d,Agtr1a,App,Bmp6,C3ar1,Cacna1a,Calb2,Catsper4,Ccl2,Ccl3,Ccl5,Cxcl2,Disc1,Dmpk,Erfe,F2r,F2rl1,Gna15,Gpr6,Grin1,Hcrtr1,Hrc,Itpr3,Lrrk2,Myc,P2rx7,Pdgfra,Pik3cg,Plcg2,Prkcb,Pth1r,Ptprc,Pvalb,Rab20,S1pr1,Slamf8,Slc11a1,Slc24a4,Slc30a3,Slc39a8,Slc4a4,Tac4,Tmem178,Trf,Trpm2,Trpm4,Trpm8
GO Biological Process	GO:0055065	metal ion homeostasis	120	3.74368e-21	4.81362e-17	4.01135e-19	4.96744	11.0721	55	0.00113513	0.00563871	348	0.000237951	1	0.00879187	1.68992	28.9954	49	506	0.0399674	0.0968379	region_1013,region_1279,region_1294,region_1306,region_133,region_1345,region_161,region_1907,region_214,region_2280,region_2361,region_2427,region_2716,region_2739,region_3082,region_3137,region_3271,region_3327,region_3371,region_3572,region_3712,region_379,region_390,region_4343,region_4367,region_4418,region_488,region_4936,region_5089,region_5386,region_5392,region_5715,region_5771,region_60…	1600014C10Rik,Adcy5,Adra1d,Agtr1a,App,Bmp6,C3ar1,Cacna1a,Calb2,Catsper4,Ccl2,Ccl3,Ccl5,Cxcl2,Disc1,Dmpk,Erfe,F2r,F2rl1,Gna15,Gpr6,Grin1,Hcrtr1,Hrc,Itpr3,Kdr,Myc,P2rx7,Pdgfra,Pik3cg,Plcg2,Prkcb,Pth1r,Ptprc,Pvalb,S1pr1,Slc11a1,Slc22a17,Slc24a4,Slc30a3,Slc39a8,Tac4,Tmc8,Tmem178,Tmtc2,Trf,Trpm2,Trpm4,Trpm8
GO Biological Process	GO:0006875	cellular metal ion homeostasis	121	3.98053e-21	5.11816e-17	4.22989e-19	5.36754	9.50156	51	0.000974119	0.00522862	280	9.05532e-05	1	0.00415833	1.80944	24.8696	45	434	0.0367047	0.103687	region_1013,region_1279,region_1294,region_1306,region_133,region_1345,region_1907,region_214,region_2280,region_2361,region_2716,region_2739,region_3082,region_3137,region_3271,region_3327,region_3371,region_3572,region_3712,region_379,region_4343,region_4367,region_4418,region_488,region_4936,region_5089,region_5386,region_5392,region_5715,region_5771,region_6089,region_6190,region_6417,region_…	1600014C10Rik,Adcy5,Adra1d,Agtr1a,App,Bmp6,C3ar1,Cacna1a,Calb2,Catsper4,Ccl2,Ccl3,Ccl5,Cxcl2,Disc1,Dmpk,Erfe,F2r,F2rl1,Gna15,Gpr6,Grin1,Hcrtr1,Hrc,Itpr3,Myc,P2rx7,Pdgfra,Pik3cg,Plcg2,Prkcb,Pth1r,Ptprc,Pvalb,S1pr1,Slc11a1,Slc24a4,Slc30a3,Slc39a8,Tac4,Tmem178,Trf,Trpm2,Trpm4,Trpm8
GO Biological Process	GO:2001233	regulation of apoptotic signaling pathway	122	4.10408e-21	5.27703e-17	4.32543e-19	5.60278	8.74566	49	0.000896622	0.00502358	239	4.7369e-05	0.60907	0.00254841	1.89017	22.7493	43	397	0.0350734	0.108312	region_1069,region_1314,region_1474,region_1577,region_158,region_1614,region_2046,region_2231,region_2427,region_2467,region_2503,region_2651,region_2687,region_2861,region_3296,region_3469,region_3523,region_373,region_3778,region_3817,region_4191,region_4235,region_4331,region_4677,region_4936,region_5099,region_5277,region_5530,region_5560,region_5585,region_5939,region_5972,region_6160,regio…	Ackr3,Acsl5,Adora2a,Agap2,Casp8,Cd74,Creb3l1,Ctsc,Cxcl12,Dab2ip,Dbh,Faim2,Gata4,Hgf,Hrk,Icam1,Il1b,Il20ra,Inhbb,Lmna,Lrrk2,Ltbr,Mapk8ip1,Myc,Nck2,Nfatc4,Nr4a2,Nrp1,Osm,Pdia2,Plaur,Ptprc,Ret,Scg2,Sgk3,Tgfb2,Timp3,Tmbim1,Tmc8,Tnf,Tpd52l1,Wnt4,Yap1
GO Biological Process	GO:0001944	vasculature development	123	4.12539e-21	5.30442e-17	4.31254e-19	4.22653	15.379	65	0.00157669	0.00666393	101	3.9906e-07	0.00513111	5.08031e-05	1.97187	30.4279	60	531	0.0489396	0.112994	region_1035,region_1075,region_1088,region_1101,region_1141,region_1474,region_1547,region_158,region_181,region_1985,region_2057,region_210,region_2231,region_2361,region_2603,region_2910,region_313,region_3469,region_3611,region_37,region_3806,region_415,region_4199,region_451,region_4545,region_4677,region_5089,region_5099,region_5177,region_5852,region_5939,region_5961,region_5964,region_6110…	Ackr3,Agtr1a,Aldh1a2,Antxr1,Casp8,Ccl12,Ccl2,Cdh13,Cxcl12,Dab2ip,Epha2,Ephb1,Flna,Fzd8,Gata4,Hhex,Htatip2,Jam3,Kdr,Lama1,Lrp5,Lyl1,Mcam,Mef2c,Mesp1,Myo1e,Ndnf,Nfatc1,Nfatc4,Notch4,Nrp1,Nrp2,Ntrk2,Pax6,Pde3b,Pdgfb,Pdgfra,Pik3cg,Plcd1,Plpp3,Prox1,Ptprj,Ramp1,Ramp2,Rapgef3,Rnf213,S1pr1,Scg2,Sema5a,Shh,Spi1,Spint1,Tal1,Tgfa,Tgfb2,Tgfbr2,Thsd7a,Tnfaip2,Wnt7a,Yap1
GO Biological Process	GO:0098771	inorganic ion homeostasis	124	4.20068e-21	5.40123e-17	4.35583e-19	4.5489	13.19	60	0.00135227	0.00615132	483	0.000758965	1	0.0202045	1.56538	34.4965	54	602	0.0440457	0.089701	region_1013,region_1279,region_1294,region_1306,region_133,region_1345,region_161,region_1907,region_214,region_2280,region_2361,region_2427,region_2716,region_2739,region_3049,region_3082,region_3137,region_3271,region_3327,region_3371,region_3572,region_3712,region_379,region_390,region_4343,region_4367,region_4418,region_4641,region_488,region_4936,region_5089,region_5386,region_5392,region_57…	1600014C10Rik,Adcy5,Adra1d,Agtr1a,App,Bmp6,C3ar1,Cacna1a,Calb2,Catsper4,Ccl2,Ccl3,Ccl5,Cxcl2,Disc1,Dmpk,Erfe,F2r,F2rl1,Gna15,Gpr6,Grin1,Hcrtr1,Hrc,Itpr3,Kdr,Lrrk2,Myc,P2rx7,Pdgfra,Pik3cg,Plcg2,Prkcb,Pth1r,Ptprc,Pvalb,Rab20,S1pr1,Sfrp4,Slamf8,Slc11a1,Slc22a17,Slc24a4,Slc30a3,Slc39a8,Slc4a4,Tac4,Tmc8,Tmem178,Tmtc2,Trf,Trpm2,Trpm4,Trpm8
GO Biological Process	GO:0055080	cation homeostasis	125	5.05407e-21	6.49852e-17	5.19881e-19	4.60426	12.8142	59	0.00131374	0.0060488	463	0.000673548	1	0.0187052	1.58104	33.5223	53	585	0.04323	0.0905983	region_1013,region_1279,region_1294,region_1306,region_133,region_1345,region_161,region_1907,region_214,region_2280,region_2361,region_2427,region_2716,region_2739,region_3049,region_3082,region_3137,region_3271,region_3327,region_3371,region_3572,region_3712,region_379,region_390,region_4343,region_4367,region_4418,region_4641,region_488,region_4936,region_5089,region_5386,region_5392,region_57…	1600014C10Rik,Adcy5,Adra1d,Agtr1a,App,Bmp6,C3ar1,Cacna1a,Calb2,Catsper4,Ccl2,Ccl3,Ccl5,Cxcl2,Disc1,Dmpk,Erfe,F2r,F2rl1,Gna15,Gpr6,Grin1,Hcrtr1,Hrc,Itpr3,Kdr,Lrrk2,Myc,P2rx7,Pdgfra,Pik3cg,Plcg2,Prkcb,Pth1r,Ptprc,Pvalb,Rab20,S1pr1,Slamf8,Slc11a1,Slc22a17,Slc24a4,Slc30a3,Slc39a8,Slc4a4,Tac4,Tmc8,Tmem178,Tmtc2,Trf,Trpm2,Trpm4,Trpm8
GO Biological Process	GO:1901699	cellular response to nitrogen compound	126	5.33121e-21	6.85487e-17	5.44037e-19	4.92785	11.161	55	0.00114425	0.00563871	485	0.000784974	1	0.0208107	1.62095	28.9954	47	506	0.0383361	0.0928854	region_1216,region_1279,region_1294,region_1306,region_1314,region_1374,region_1467,region_1614,region_1685,region_1793,region_1859,region_1889,region_2057,region_2242,region_2361,region_287,region_306,region_3097,region_3266,region_3327,region_341,region_3508,region_3611,region_373,region_375,region_4072,region_4191,region_4248,region_4265,region_4418,region_488,region_4965,region_5089,region_51…	Abcb4,Agtr1a,Aif1,App,Bglap2,Cacna1a,Casp4,Casp7,Ccl2,Chrm1,Chrnb2,Cyba,Eif4ebp1,Epha4,Ghr,Gjb2,Glra1,Gnai2,Icam1,Inhbb,Lamtor5,Lrrk2,Mb21d1,Mef2c,Nfkb1,Nkx6-1,Nod1,Nr4a2,Ntrk1,Ntrk2,P2rx7,P2ry12,Pde3b,Pdgfra,Pik3cg,Rapgef3,Rgs8,Stat5a,Tbc1d4,Tlr2,Tlr4,Tlr6,Tlr9,Tnf,Trpm2,Wnt1,Zc3hav1
GO Biological Process	GO:1901214	regulation of neuron death	127	5.36917e-21	6.90368e-17	5.43597e-19	6.66642	6.30023	42	0.000645913	0.00430593	124	1.313e-06	0.0168826	0.00013615	2.31059	16.446	38	287	0.0309951	0.132404	region_1135,region_1279,region_1306,region_1375,region_158,region_1685,region_1765,region_1889,region_1907,region_2057,region_2547,region_2603,region_2716,region_3137,region_3159,region_3296,region_3327,region_3393,region_3611,region_3806,region_415,region_4418,region_443,region_477,region_5115,region_5430,region_5879,region_5939,region_6051,region_6108,region_6417,region_6430,region_7065,region_…	Adora2a,Agap2,Barhl1,Cacna1a,Ccl12,Ccl2,Ccl3,Ccl5,Cntfr,Dcc,Egln3,En2,Ephb1,Erbb3,F2r,Faim2,Fgfr3,Fzd1,Grin1,Grm7,Isl1,Lrrk2,Mef2c,Ndnf,Nes,Nr4a2,Nrp1,Ntrk1,Ntrk2,Rras2,Six4,Snca,Tgfb2,Tlr4,Tlr6,Trpm2,Tyro3,Wnt1
GO Biological Process	GO:0006812	cation transport	128	6.38621e-21	8.21139e-17	6.41515e-19	3.97736	17.3482	69	0.00177857	0.00707402	1083	0.0166648	1	0.197854	1.32205	45.3841	60	792	0.0489396	0.0757576	region_1075,region_1190,region_1200,region_1279,region_1294,region_1306,region_1467,region_1615,region_1653,region_1907,region_210,region_214,region_2628,region_2716,region_2739,region_2783,region_2963,region_300,region_3014,region_313,region_3137,region_3191,region_3327,region_3371,region_3572,region_3712,region_3790,region_4031,region_4178,region_4265,region_4277,region_4367,region_4418,region_…	AA467197,AI854703,Abcb4,Adora3,Ano1,Cacna1a,Cacng2,Cacng3,Catsper4,Ccl3,Ccl5,Cd300a,Chrnb2,Cox6a2,Cox8b,Cracr2b,F2r,Fcer1g,Grin1,Grm7,Hpn,Hvcn1,Itpr3,Kcnh3,Kcnj8,Kcnk13,Kcnk15,Kcnk18,Kcnmb4,Kcnn2,Lyn,Nfatc1,Orai3,P2rx5,P2rx7,P2ry12,Panx2,Plcg2,Prkcb,Ptprc,Ramp1,Ramp2,Scn4b,Slc11a1,Slc12a4,Slc24a4,Slc2a12,Slc30a3,Slc38a1,Slc39a8,Slc46a1,Slc4a4,Slc5a10,Slc6a15,Sri,Trf,Trpm2,Trpm4,Trpm5,Trpm8
GO Biological Process	GO:0045596	negative regulation of cell differentiation	129	6.70867e-21	8.62601e-17	6.68683e-19	3.74928	19.7371	74	0.00202349	0.00758663	330	0.000172898	1	0.00673673	1.57561	41.8886	66	731	0.0538336	0.0902873	region_1035,region_1073,region_11,region_1135,region_1345,region_1375,region_141,region_158,region_1818,region_1870,region_1907,region_210,region_214,region_2197,region_2242,region_2537,region_2733,region_286,region_293,region_3084,region_3097,region_3121,region_313,region_3265,region_329,region_3359,region_37,region_4031,region_415,region_4191,region_4199,region_4265,region_451,region_4773,regio…	Adamts7,App,Asap1,Bex1,Bhlhe23,C1qc,Ccl3,Cd74,Cxcl10,Dab2ip,Dlx2,Epha3,Epha4,Ephb1,Erbb2,Fgfr3,Flna,Fstl4,Gal,H2-M3,Hist1h4k,Hist1h4n,Hlx,Hoxa5,Hpn,Il4ra,Irx3,Isl1,Itpkb,Loxl3,Lrp5,Lyn,Mbnl3,Mesp1,Myc,Nfatc1,Nfatc4,Nkx6-1,Nkx6-3,Notch4,Nr2e1,Nrp1,P2ry12,Pax6,Pdgfb,Rgma,Sema5a,Shh,Six3,Six4,Skor1,Sostdc1,Stat5a,Tgfb2,Tmem176a,Tmem176b,Tmem178,Tnf,Trim62,Trpm4,Wnt1,Wnt4,Wnt7a,Yap1,Zfp608,Zhx2
GO Biological Process	GO:0050801	ion homeostasis	130	7.48122e-21	9.61935e-17	7.3995e-19	4.42451	13.7868	61	0.00141346	0.00625385	534	0.00122663	1	0.0295356	1.52593	36.0437	55	629	0.0448613	0.0874404	region_1013,region_1279,region_1294,region_1306,region_133,region_1345,region_161,region_1907,region_214,region_2280,region_2361,region_2427,region_2716,region_2739,region_3049,region_3082,region_3137,region_3271,region_3327,region_3371,region_3572,region_3712,region_379,region_390,region_4343,region_4367,region_4418,region_4641,region_488,region_4936,region_5089,region_5386,region_5392,region_57…	1600014C10Rik,Adcy5,Adra1d,Agtr1a,App,Bmp6,C3ar1,Cacna1a,Calb2,Catsper4,Ccl2,Ccl3,Ccl5,Cxcl2,Disc1,Dmpk,Erfe,F2r,F2rl1,Gna15,Gpr6,Grin1,Hcrtr1,Hrc,Itpr3,Kdr,Lipg,Lrrk2,Myc,P2rx7,Pdgfra,Pik3cg,Plcg2,Prkcb,Pth1r,Ptprc,Pvalb,Rab20,S1pr1,Sfrp4,Slamf8,Slc11a1,Slc22a17,Slc24a4,Slc30a3,Slc39a8,Slc4a4,Tac4,Tmc8,Tmem178,Tmtc2,Trf,Trpm2,Trpm4,Trpm8
GO Biological Process	GO:0072503	cellular divalent inorganic cation homeostasis	131	8.59861e-21	1.10561e-16	8.43977e-19	5.90467	7.79045	46	0.000798693	0.00471601	198	1.60086e-05	0.205838	0.00103959	2.01547	20.3426	41	355	0.0334421	0.115493	region_1013,region_1279,region_1294,region_1306,region_133,region_1345,region_1907,region_214,region_2280,region_2361,region_2716,region_2739,region_3082,region_3137,region_3271,region_3327,region_3371,region_3572,region_3712,region_379,region_4343,region_4367,region_4418,region_488,region_5089,region_5386,region_5392,region_5771,region_6089,region_6417,region_6432,region_6663,region_6864,region_…	1600014C10Rik,Adcy5,Adra1d,Agtr1a,App,C3ar1,Cacna1a,Calb2,Catsper4,Ccl2,Ccl3,Ccl5,Cxcl2,Disc1,Dmpk,F2r,F2rl1,Gna15,Gpr6,Grin1,Hcrtr1,Hrc,Itpr3,P2rx7,Pdgfra,Pik3cg,Plcg2,Prkcb,Pth1r,Ptprc,Pvalb,S1pr1,Slc11a1,Slc24a4,Slc30a3,Slc39a8,Tac4,Tmem178,Trpm2,Trpm4,Trpm8
GO Biological Process	GO:0045860	positive regulation of protein kinase activity	132	1.17227e-20	1.50731e-16	1.1419e-18	5.2301	9.75125	51	0.000999718	0.00522862	231	3.61978e-05	0.465432	0.00201486	1.85147	25.3853	47	443	0.0383361	0.106095	region_1073,region_1294,region_181,region_1859,region_1889,region_2424,region_2592,region_2687,region_2716,region_2910,region_2916,region_3386,region_4191,region_4248,region_4331,region_443,region_456,region_477,region_5089,region_5277,region_5430,region_5735,region_5939,region_6110,region_6163,region_6417,region_6430,region_6519,region_6633,region_7171,region_7289,region_7300,region_7303,region_…	Agap2,Agtr1a,Camk1,Ccl5,Cd74,Cemip,Dab2ip,Epha4,Erbb2,Erbb3,F2r,Fzd8,Gnai2,Grm4,Hgf,Il1b,Irgm2,Lgals9,Lrrk2,Map3k20,Mdfic,Met,Ncf1,Nckap1l,P2rx7,Pde5a,Pdgfb,Pik3cg,Prkag2,Prox1,Ptprc,Rassf2,Sash1,Slc11a1,Snca,Tgfa,Tgfb2,Tgfbr2,Tlr4,Tlr6,Tlr9,Tnf,Tnfrsf11a,Tnik,Tom1l1,Tpd52l1,Trf
GO Biological Process	GO:0072358	cardiovascular system development	133	1.19443e-20	1.5358e-16	1.15473e-18	4.13733	15.7106	65	0.00161068	0.00666393	118	1.0153e-06	0.0130548	0.000110634	1.9177	31.2875	60	546	0.0489396	0.10989	region_1035,region_1075,region_1088,region_1101,region_1141,region_1474,region_1547,region_158,region_181,region_1985,region_2057,region_210,region_2231,region_2361,region_2603,region_2910,region_313,region_3469,region_3611,region_37,region_3806,region_415,region_4199,region_451,region_4545,region_4677,region_5089,region_5099,region_5177,region_5852,region_5939,region_5961,region_5964,region_6110…	Ackr3,Agtr1a,Aldh1a2,Antxr1,Casp8,Ccl12,Ccl2,Cdh13,Cxcl12,Dab2ip,Epha2,Ephb1,Flna,Fzd8,Gata4,Hhex,Htatip2,Jam3,Kdr,Lama1,Lrp5,Lyl1,Mcam,Mef2c,Mesp1,Myo1e,Ndnf,Nfatc1,Nfatc4,Notch4,Nrp1,Nrp2,Ntrk2,Pax6,Pde3b,Pdgfb,Pdgfra,Pik3cg,Plcd1,Plpp3,Prox1,Ptprj,Ramp1,Ramp2,Rapgef3,Rnf213,S1pr1,Scg2,Sema5a,Shh,Spi1,Spint1,Tal1,Tgfa,Tgfb2,Tgfbr2,Thsd7a,Tnfaip2,Wnt7a,Yap1
GO Biological Process	GO:0006873	cellular ion homeostasis	134	1.34637e-20	1.73116e-16	1.29191e-18	4.82523	11.3984	55	0.00116859	0.00563871	407	0.000445297	1	0.0140679	1.64443	29.7976	49	520	0.0399674	0.0942308	region_1013,region_1279,region_1294,region_1306,region_133,region_1345,region_1907,region_214,region_2280,region_2361,region_2716,region_2739,region_3049,region_3082,region_3137,region_3271,region_3327,region_3371,region_3572,region_3712,region_379,region_4343,region_4367,region_4418,region_4641,region_488,region_4936,region_5089,region_5386,region_5392,region_5715,region_5771,region_6089,region_…	1600014C10Rik,Adcy5,Adra1d,Agtr1a,App,Bmp6,C3ar1,Cacna1a,Calb2,Catsper4,Ccl2,Ccl3,Ccl5,Cxcl2,Disc1,Dmpk,Erfe,F2r,F2rl1,Gna15,Gpr6,Grin1,Hcrtr1,Hrc,Itpr3,Lrrk2,Myc,P2rx7,Pdgfra,Pik3cg,Plcg2,Prkcb,Pth1r,Ptprc,Pvalb,Rab20,S1pr1,Slamf8,Slc11a1,Slc24a4,Slc30a3,Slc39a8,Slc4a4,Tac4,Tmem178,Trf,Trpm2,Trpm4,Trpm8
GO Biological Process	GO:1903532	positive regulation of secretion by cell	135	1.41137e-20	1.81474e-16	1.34425e-18	5.82893	7.89167	46	0.00080907	0.00471601	206	1.95413e-05	0.251262	0.00121972	1.99859	20.5145	41	358	0.0334421	0.114525	region_1216,region_1279,region_1294,region_1306,region_1467,region_1900,region_1907,region_203,region_2048,region_2116,region_214,region_2242,region_2687,region_2716,region_2783,region_2824,region_310,region_3151,region_3296,region_3554,region_379,region_3936,region_4178,region_4191,region_457,region_5430,region_5582,region_5585,region_5939,region_6430,region_6860,region_7171,region_721,region_73…	Adora2a,Adora3,Agtr1a,Ano1,Bglap2,Bmp6,Casp4,Ccl3,Cd14,Cd244,Cd300c2,Chrnb2,F2r,F2rl1,Fcer1g,Foxl2,Gal,Gpr27,H2-T23,Hk1,Il1a,Il1b,Il1rap,Il4ra,Inhbb,Isl1,Lgals9,Nkx6-1,Nlrp1a,P2rx7,Rasl10b,Snca,Sri,Tgfb2,Tlr2,Tlr4,Tnf,Trpm2,Trpm4,Ttn,Unc93b1
GO Biological Process	GO:0070304	positive regulation of stress-activated protein kinase signaling cascade	136	1.41384e-20	1.81791e-16	1.3367e-18	9.87559	3.13905	31	0.000321822	0.00317818	64	3.76203e-08	0.000483722	7.55816e-06	3.29495	8.19434	27	143	0.0220228	0.188811	region_1859,region_1889,region_2592,region_2687,region_2910,region_2916,region_3736,region_379,region_4031,region_4191,region_4199,region_4316,region_4331,region_456,region_488,region_5102,region_5735,region_5939,region_6160,region_6430,region_6519,region_655,region_7364,region_748,region_8532,region_8717,region_8778,region_9034,region_9416,region_9431,region_958	App,Card9,Dab2ip,Dusp15,Epha4,F2rl1,Fzd8,Il1b,Ltbr,Lyn,Map3k20,Mdfic,Met,Ncf1,Nod1,Rassf2,Sash1,Tgfb2,Tlr4,Tlr6,Tlr9,Tnf,Tnfrsf11a,Tnik,Tpd52l1,Trf,Wnt7a
GO Biological Process	GO:0044057	regulation of system process	137	1.69349e-20	2.17749e-16	1.58941e-18	5.18392	9.83812	51	0.00100862	0.00522862	211	2.07842e-05	0.267243	0.00126655	1.87814	25.5572	48	446	0.0391517	0.107623	region_1069,region_1314,region_1614,region_1653,region_1907,region_210,region_214,region_2522,region_2687,region_2716,region_2783,region_2984,region_306,region_313,region_3151,region_3271,region_3296,region_3554,region_37,region_373,region_379,region_3826,region_4072,region_4156,region_4812,region_4965,region_5074,region_5560,region_5585,region_5939,region_6309,region_6484,region_6697,region_6978…	Abcb4,Adora2a,Adra1d,Adrb1,Agtr1a,Aif1,Bmp6,Ccl3,Chrm1,Comt,Cyba,Dbh,Dmpk,F2r,F2rl1,Ffar3,Flna,Foxl2,Gal,Gjd3,Glra1,Hgf,Hrc,Icam1,Il1b,Inhbb,Kcnn2,Lmna,Mgll,Myl3,Ncf1,Nfatc1,Npnt,Pde5a,Pdgfb,Ptpro,Ren1,Scn4b,Sri,Tac4,Tgfb2,Thrb,Tifab,Tnfrsf21,Tnni2,Trpm4,Tshz3,Ttn
GO Biological Process	GO:0060284	regulation of cell development	138	1.98819e-20	2.55642e-16	1.85247e-18	3.46	23.1214	80	0.00237045	0.00820176	413	0.00045954	1	0.0143069	1.49048	48.3065	72	843	0.0587276	0.0854093	region_1135,region_1209,region_141,region_1467,region_158,region_1607,region_1685,region_17,region_1870,region_192,region_2048,region_2057,region_2188,region_2197,region_2217,region_2242,region_2687,region_269,region_286,region_293,region_3122,region_3137,region_3265,region_329,region_3327,region_3342,region_3611,region_37,region_3806,region_3870,region_3893,region_4031,region_4191,region_4199,re…	App,Arhgap44,Asap1,Bex1,Bhlhe23,Bmp6,Cacna1a,Camk1,Chrnb2,Dab2ip,Disc1,Dlx2,Dusp15,Emx1,Epha3,Epha4,Fes,Fez1,Fezf1,Fgfr3,Flna,Fstl4,Gal,Gdf7,Golga4,Grin1,Hgf,Hoxd11,Il1b,Il1rap,Irx3,Isl1,Lims1,Lrrk2,Lta,Lyn,Mef2c,Mgll,Ndnf,Neurog2,Nfatc4,Nkx6-1,Nr2e1,Nrp1,Ntrk1,Ntrk2,P2ry12,Pax6,Pde5a,Plxna4,Prox1,Ptprf,Rasal1,Ret,Rgma,Sema5a,Shh,Six3,Slamf8,Spint1,Syt2,Tgif1,Tgif2,Tnf,Tnfrsf21,Tnik,Tyrobp,Ust,Wn…
GO Biological Process	GO:0019221	cytokine-mediated signaling pathway	139	2.27285e-20	2.92243e-16	2.10247e-18	6.05822	7.26286	44	0.000744603	0.00451097	111	6.88968e-07	0.00885876	7.98086e-05	2.23332	19.2538	43	336	0.0350734	0.127976	region_102,region_1030,region_1347,region_1576,region_1765,region_1907,region_2046,region_2048,region_2138,region_2190,region_2217,region_2231,region_2603,region_2687,region_2824,region_3097,region_3266,region_3463,region_3523,region_3733,region_3870,region_4191,region_4404,region_4773,region_5277,region_5620,region_5820,region_6160,region_627,region_6417,region_677,region_6916,region_7536,region…	Ackr3,Ccl12,Ccl2,Ccl3,Ccl4,Ccl5,Ccrl2,Cd74,Cntfr,Cxcl10,Cxcl12,Cxcl2,Eda,Ghr,Gm13277,Gm13278,Gm13305,Gm21973,Grem2,Il10ra,Il10rb,Il12b,Il1a,Il1b,Il1rap,Il1rl2,Il20ra,Il21r,Il4ra,Irf5,Krt8,Lims1,Lrrc15,Lrrc4,Ltbr,Osm,Pdgfb,Rps6ka4,Stat5a,Tnf,Tnfrsf11a,Tnfrsf21,Tnfrsf9
GO Biological Process	GO:1903706	regulation of hemopoiesis	140	2.35003e-20	3.02167e-16	2.15833e-18	4.68107	11.9631	56	0.00122648	0.00574123	91	1.99221e-07	0.00256158	2.81493e-05	2.21601	21.6606	48	378	0.0391517	0.126984	region_1073,region_11,region_1135,region_1345,region_1400,region_1818,region_1859,region_1907,region_2537,region_2733,region_2784,region_2916,region_3084,region_3097,region_3359,region_3456,region_3611,region_3893,region_4031,region_4191,region_4325,region_4382,region_4650,region_4936,region_5067,region_5177,region_5209,region_5269,region_5277,region_5436,region_5509,region_5590,region_5639,regio…	C1qc,Casp8,Ccl3,Cd1d1,Cd74,Cd83,Duxbl1,Duxbl2,Duxbl3,Erbb2,Evi2b,Fes,Fgfr3,H2-M3,Hist1h4k,Hist1h4n,Hlx,Hoxa5,Ikzf1,Ikzf3,Il12b,Il1rl2,Il4ra,Itpkb,Kdr,Lgals9,Loxl3,Lyn,Mef2c,Myc,Nckap1l,Ocstamp,Ptprc,Rassf2,Shh,Sox13,Spi1,Stat5a,Tal1,Tgfbr2,Tlr9,Tmem176a,Tmem176b,Tmem178,Tnf,Tnfsf9,Tyrobp,Zfp608
GO Biological Process	GO:0050900	leukocyte migration	141	2.46227e-20	3.16599e-16	2.24538e-18	8.43811	4.02934	34	0.000413096	0.00348575	73	7.813e-08	0.0010046	1.37616e-05	2.90851	10.6584	31	186	0.0252855	0.166667	region_1088,region_1278,region_1279,region_1306,region_1314,region_1474,region_1614,region_1679,region_1907,region_214,region_2522,region_2603,region_2687,region_373,region_379,region_4178,region_4191,region_4335,region_4504,region_4641,region_4773,region_5089,region_5560,region_5723,region_5939,region_6417,region_6916,region_6952,region_7349,region_7409,region_7707,region_8476,region_9222,region…	Add2,Artn,Ccl12,Ccl2,Ccl3,Ccl4,Ccl5,Cxcl10,Cxcl16,Cxcl2,Dbh,Dock8,F2rl1,Fcer1g,Fut7,Icam1,Il1b,Jam3,Msn,Myo1g,Nckap1l,Pdgfb,Pik3cg,Ptpro,S1pr1,Scg2,Slamf8,Tgfb2,Tnf,Trpm2,Trpm4
GO Biological Process	GO:0050708	regulation of protein secretion	142	3.1136e-20	4.00346e-16	2.81934e-18	5.4476	8.81122	48	0.000903344	0.00492106	216	2.51762e-05	0.323716	0.00149868	1.92443	22.8639	44	399	0.0358891	0.110276	region_1216,region_1279,region_1294,region_1306,region_1859,region_1889,region_1900,region_1907,region_203,region_2048,region_2116,region_214,region_2242,region_2687,region_2716,region_2783,region_2824,region_3008,region_310,region_3296,region_3554,region_379,region_3936,region_4031,region_4191,region_4343,region_5582,region_5585,region_5939,region_6417,region_6430,region_6853,region_6860,region_…	Adcy5,Adora2a,Agtr1a,Ano1,Bglap2,Casp4,Ccl3,Ccl5,Cd14,Cd244,Cd300c2,Epha5,F2r,F2rl1,Gpr27,H2-T23,Hk1,Ica1,Il1a,Il1b,Il1rap,Il4ra,Inhbb,Isl1,Lgals9,Lrp5,Lyn,Nkx6-1,Nlrp1a,P2rx7,Pde3b,Sri,Tgfb2,Tlr2,Tlr4,Tlr6,Tlr9,Tnf,Tnfrsf21,Tnfrsf9,Trpm2,Trpm4,Ttn,Unc93b1
GO Biological Process	GO:0007169	transmembrane receptor protein tyrosine kinase signaling pathway	143	3.12028e-20	4.01205e-16	2.80563e-18	5.7093	8.05702	46	0.000826023	0.00471601	143	2.80335e-06	0.0360455	0.000252067	2.09794	20.9729	44	366	0.0358891	0.120219	region_1073,region_1135,region_1147,region_158,region_1685,region_181,region_2057,region_2197,region_2268,region_2361,region_2424,region_2733,region_287,region_2916,region_3097,region_3265,region_3266,region_3893,region_4031,region_4060,region_415,region_4235,region_443,region_4545,region_477,region_5249,region_5468,region_5735,region_6155,region_6318,region_6519,region_6812,region_6838,region_73…	Bex1,Blnk,Ccl2,Dab2ip,Dok1,Efna2,Eif4ebp1,Epha10,Epha2,Epha3,Epha4,Epha5,Ephb1,Erbb2,Erbb3,Fat4,Fes,Fgf5,Fgfr3,Ghr,Grap,Hck,Hgf,Insrr,Kdr,Lyn,Met,Myo1e,Nck2,Nrp1,Nrp2,Ntrk1,Ntrk2,Pdgfb,Pdgfra,Ptprj,Ptprr,Rassf2,Ret,Sh2d6,Stat5a,Sulf2,Tgfa,Tom1l1
GO Biological Process	GO:0046649	lymphocyte activation	144	3.64584e-20	4.68783e-16	3.25543e-18	4.63489	12.0823	56	0.0012387	0.00574123	72	7.59025e-08	0.000975955	1.35549e-05	2.24307	22.2909	50	389	0.040783	0.128535	region_102,region_1278,region_1294,region_1314,region_1391,region_1467,region_1512,region_1547,region_1614,region_1685,region_1818,region_210,region_217,region_2231,region_2537,region_279,region_2910,region_3097,region_310,region_313,region_3193,region_3393,region_3611,region_373,region_379,region_415,region_4178,region_4235,region_4244,region_4504,region_5115,region_5177,region_5209,region_5240,…	Apbb1ip,Bcl2a1d,Blnk,Cd151,Cd1d1,Cd244,Cd74,Cd86,Chrnb2,Cxcl12,Dock8,Elf4,Ephb1,F2rl1,Fcer1g,Fut7,Fzd8,Gm13277,Gm13278,H2-M3,H2-T23,Hhex,Icam1,Ikzf1,Ikzf3,Il12b,Irf4,Itpkb,Lat2,Lyl1,Mef2c,Mertk,Msn,Nck2,Nfatc1,Ntrk1,P2rx7,Pik3cd,Plcg2,Prkcb,Ptprc,Shh,Slc11a1,Spi1,Stat5a,Stx11,Tlr4,Tyro3,Wnt1,Wnt4
GO Biological Process	GO:0050727	regulation of inflammatory response	145	3.82287e-20	4.91545e-16	3.38997e-18	6.69794	5.97199	40	0.00061226	0.00410088	114	8.5288e-07	0.0109663	9.61958e-05	2.38262	15.5291	37	271	0.0301795	0.136531	region_1216,region_1259,region_1374,region_1859,region_1889,region_1907,region_1922,region_212,region_2327,region_2687,region_2948,region_3097,region_3296,region_3393,region_375,region_3835,region_4031,region_4178,region_4191,region_457,region_4641,region_5074,region_5088,region_5089,region_5430,region_5582,region_5820,region_6430,region_6564,region_6668,region_7171,region_721,region_7641,region_…	A2m,Adora2a,Adora3,Alox5ap,Casp4,Ccl3,Cd55,Fcer1g,Ffar3,Hgf,Il12b,Il1b,Il1rl2,Isl1,Ldlr,Lgals9,Lta,Lyn,Mgll,Nfkb1,Nlrx1,Pik3ap1,Pik3cg,Pla2g5,Psmb4,Serping1,Slamf8,Snca,Stat5a,Susd4,Tlr2,Tlr4,Tlr6,Tlr9,Tnf,Tnfrsf11a,Tyro3
GO Biological Process	GO:0001568	blood vessel development	146	4.07982e-20	5.24584e-16	3.59304e-18	4.20681	14.738	62	0.00151097	0.00635637	81	1.30376e-07	0.00167638	2.0696e-05	2.05102	28.7662	59	502	0.048124	0.11753	region_1035,region_1075,region_1088,region_1101,region_1141,region_1474,region_1547,region_158,region_181,region_1985,region_2057,region_2231,region_2361,region_2603,region_2910,region_3469,region_3611,region_37,region_3806,region_415,region_4199,region_451,region_4545,region_4677,region_5089,region_5099,region_5177,region_5852,region_5939,region_5961,region_5964,region_6110,region_6232,region_63…	Ackr3,Agtr1a,Aldh1a2,Antxr1,Casp8,Ccl12,Ccl2,Cdh13,Cxcl12,Dab2ip,Epha2,Ephb1,Flna,Fzd8,Gata4,Hhex,Htatip2,Jam3,Kdr,Lama1,Lrp5,Lyl1,Mcam,Mef2c,Mesp1,Myo1e,Ndnf,Nfatc4,Notch4,Nrp1,Nrp2,Ntrk2,Pax6,Pde3b,Pdgfb,Pdgfra,Pik3cg,Plcd1,Plpp3,Prox1,Ptprj,Ramp1,Ramp2,Rapgef3,Rnf213,S1pr1,Scg2,Sema5a,Shh,Spi1,Spint1,Tal1,Tgfa,Tgfb2,Tgfbr2,Thsd7a,Tnfaip2,Wnt7a,Yap1
GO Biological Process	GO:0002274	myeloid leukocyte activation	147	4.43038e-20	5.69658e-16	3.87523e-18	11.8578	2.27698	27	0.000233441	0.00276809	38	3.50648e-09	4.50863e-05	1.18648e-06	4.02717	5.95952	24	104	0.0195759	0.230769	region_1391,region_1586,region_1859,region_1907,region_379,region_4031,region_4178,region_457,region_4650,region_5067,region_5430,region_5590,region_5914,region_6110,region_6160,region_6296,region_6417,region_6430,region_6734,region_6978,region_7171,region_7467,region_8012,region_81,region_8522,region_86,region_9108	Adora3,Aif1,Ccl3,Ccl5,Cd244,Cd300a,Cd86,F2rl1,Fcer1g,Irf4,Lat2,Ltbr,Lyn,Myo1f,Slc11a1,Snca,Spi1,Stx11,Tac4,Tgfbr2,Tlr4,Tlr9,Tnfsf9,Tyrobp
GO Biological Process	GO:0010469	regulation of receptor activity	148	4.4602e-20	5.73492e-16	3.87495e-18	4.5365	12.5648	57	0.00128816	0.00584376	281	9.11666e-05	1	0.0041716	1.68784	33.1785	56	579	0.045677	0.0967185	region_102,region_1285,region_1433,region_1474,region_1679,region_181,region_1907,region_1979,region_2090,region_214,region_2190,region_2231,region_2509,region_2603,region_2687,region_2783,region_2824,region_3523,region_3611,region_388,region_4191,region_4199,region_4545,region_4773,region_4794,region_488,region_5067,region_5115,region_5262,region_5534,region_5585,region_5590,region_5596,region_5…	Apela,App,Artn,Bmp6,Cacng2,Cacng3,Ccl12,Ccl2,Ccl3,Ccl4,Ccl5,Cmtm3,Cmtm8,Cxcl10,Cxcl12,Cxcl16,Cxcl2,Eda,Erfe,Fgf5,Gal,Gdf7,Gm13277,Gm13278,Gprc5a,Hgf,Hrc,Il12b,Il1a,Il1b,Inhbb,Lhb,Lta,Mef2c,Mia,Ncf1,Osgin1,Osm,Pdgfb,Pdyn,Plau,Ppy,Ptprj,Retnla,Scg2,Sri,Tac4,Tgfa,Tgfb2,Tnf,Tnfsf13b,Tnfsf9,Uts2b,Vip,Wnt1,Wnt7a
GO Biological Process	GO:0043269	regulation of ion transport	149	4.65816e-20	5.98947e-16	4.01977e-18	4.3882	13.4452	59	0.00137842	0.0060488	402	0.000408877	1	0.013078	1.59163	35.1841	56	614	0.045677	0.0912052	region_1294,region_1314,region_1467,region_1614,region_1653,region_1859,region_1907,region_214,region_2231,region_2603,region_2687,region_2716,region_2783,region_3014,region_306,region_3137,region_3191,region_3271,region_3296,region_3327,region_3532,region_3611,region_37,region_373,region_4003,region_4031,region_4248,region_4265,region_4346,region_4418,region_4773,region_4965,region_5089,region_5…	Abcb4,Adora2a,Ahnak,Ano1,Cacna1a,Cacng2,Cacng3,Catsper4,Ccl12,Ccl2,Ccl3,Ccl4,Ccl5,Cd300a,Cemip,Chrm1,Chrnb2,Cracr2b,Cxcl10,Cxcl12,Cyba,Dmpk,Erfe,F2r,Fhl1,Flna,Gal,Gnai2,Gpm6b,Grin1,Hrc,Hvcn1,Icam1,Il1b,Kcnh3,Kcnj8,Kcnk13,Lyn,Mef2c,Nat8l,P2rx7,P2ry12,Pdgfb,Pik3cg,Plcg2,Ptpn3,Scn4b,Sfrp4,Slc6a1,Snca,Sri,Tcaf1,Tlr9,Tnfrsf11a,Trpm4,Trpm5
GO Biological Process	GO:0043065	positive regulation of apoptotic process	150	4.70705e-20	6.05233e-16	4.03489e-18	4.60818	12.1523	56	0.00124588	0.00574123	438	0.000542457	1	0.0159245	1.61233	31.6313	51	552	0.0415987	0.0923913	region_1101,region_1135,region_1294,region_1512,region_1907,region_2046,region_2467,region_2503,region_2547,region_2592,region_2697,region_2716,region_2808,region_2916,region_3137,region_3151,region_3296,region_3329,region_3523,region_3611,region_3733,region_4031,region_4191,region_4235,region_4244,region_4331,region_4332,region_4794,region_4936,region_5099,region_5240,region_5430,region_5530,reg…	Adora2a,Aldh1a2,Bcl2a1a,Bcl2a1b,Bcl2a1d,Casp8,Ccl3,Ccl5,Ctsc,Dab2ip,Eef1a2,Egln3,F2r,Fgfr3,Foxl2,Gal,Gm29094,Grin1,Hoxa5,Hrk,Ifit2,Il12b,Il20ra,Inhbb,Irf5,Lta,Ltbr,Lyn,Map3k20,Mef2c,Myc,Nck2,Nfatc4,Nlrp1a,Nod1,Osgin1,Osm,P2rx7,Pik3cd,Plaur,Ptprc,Rassf2,Rassf6,Ret,Sfrp4,Snca,Tgfb2,Timp3,Tnf,Tnfaip8,Tpd52l1
GO Biological Process	GO:0051223	regulation of protein transport	151	5.26025e-20	6.76362e-16	4.47922e-18	3.64875	20.0069	73	0.00205114	0.00748411	321	0.000154305	1	0.00618084	1.57577	42.5189	67	742	0.0546493	0.0902965	region_1022,region_1073,region_1147,region_1216,region_1279,region_1294,region_1306,region_1859,region_1889,region_1900,region_1907,region_203,region_2048,region_2116,region_214,region_2190,region_2242,region_2687,region_2716,region_2783,region_2824,region_3008,region_310,region_32,region_3296,region_3532,region_3554,region_37,region_379,region_3936,region_4031,region_4191,region_4343,region_488,…	Adcy5,Adora2a,Agtr1a,Ano1,App,Bglap2,Bmp6,Cabp1,Camk1,Casp4,Ccl2,Ccl3,Ccl5,Cd14,Cd244,Cd300c2,Cemip,Chrm1,Dab2ip,Eda,Epha5,Erbb2,F2r,F2rl1,Flna,Fzd1,Gpr27,H2-T23,Hk1,Hps4,Ica1,Il1a,Il1b,Il1rap,Il4ra,Inhbb,Isl1,Lgals9,Lrp5,Lrrk2,Lyn,Mdfic,Nkx6-1,Nlrp1a,P2rx7,Pde3b,Pkia,Prr5l,Rapgef3,Rbpms,Sema5a,Shh,Sri,Sulf2,Tcaf1,Tgfb2,Tlr2,Tlr4,Tlr6,Tlr9,Tnf,Tnfrsf21,Tnfrsf9,Trpm2,Trpm4,Ttn,Unc93b1
GO Biological Process	GO:0050804	modulation of synaptic transmission	152	5.99802e-20	7.71226e-16	5.07385e-18	6.05999	7.09573	43	0.000727468	0.00440845	202	1.85899e-05	0.239029	0.00118331	2.06586	18.3943	38	321	0.0309951	0.11838	region_1467,region_1685,region_2057,region_2687,region_2712,region_2716,region_293,region_3008,region_3137,region_3271,region_329,region_3296,region_3327,region_3611,region_4199,region_4248,region_4418,region_488,region_5099,region_5392,region_5430,region_5665,region_5735,region_6108,region_6163,region_6466,region_6519,region_6801,region_6864,region_6957,region_7055,region_7171,region_7303,region…	Adora2a,App,Cacna1a,Cacng2,Ccl2,Chrnb2,Clstn2,Ctnnd2,Disc1,Dmpk,Epha4,F2r,Gnai2,Grin1,Grm4,Grm7,Ica1,Il1b,Itpr3,Lrrk2,Mef2c,Met,Mgll,Nat8l,Nfatc4,Nr2e1,Nsg1,Ntrk1,Ntrk2,Ophn1,Shisa6,Shisa8,Slc6a1,Snca,Sncaip,Syt12,Tshz3,Wnt7a
GO Biological Process	GO:0070302	regulation of stress-activated protein kinase signaling cascade	153	7.82049e-20	1.00556e-15	6.57228e-18	7.80015	4.48709	35	0.000460026	0.00358827	137	1.9596e-06	0.0251965	0.000183916	2.56633	11.6898	30	204	0.0244698	0.147059	region_1859,region_1889,region_2592,region_2687,region_2910,region_2916,region_3736,region_3778,region_379,region_4031,region_415,region_4191,region_4199,region_4316,region_4331,region_456,region_488,region_5102,region_5735,region_5939,region_5972,region_6160,region_6430,region_6519,region_655,region_7364,region_748,region_7641,region_8532,region_8717,region_8778,region_9034,region_9416,region_94…	App,Card9,Dab2ip,Dusp15,Epha4,Ephb1,F2rl1,Fzd8,Hgf,Il1b,Ltbr,Lyn,Map3k20,Mapk8ip1,Mdfic,Met,Ncf1,Nod1,Rassf2,Sash1,Tgfb2,Tlr4,Tlr6,Tlr9,Tnf,Tnfrsf11a,Tnik,Tpd52l1,Trf,Wnt7a
GO Biological Process	GO:0002685	regulation of leukocyte migration	154	8.35439e-20	1.07421e-15	6.97538e-18	8.45167	3.90455	33	0.000400303	0.00338323	74	8.58403e-08	0.00110374	1.49153e-05	2.95781	10.1426	30	177	0.0244698	0.169491	region_1088,region_1216,region_1278,region_1314,region_1325,region_1614,region_1907,region_2231,region_2280,region_2603,region_2824,region_3112,region_373,region_379,region_4031,region_4265,region_4545,region_457,region_4641,region_4773,region_488,region_5227,region_5277,region_5914,region_6417,region_6916,region_6952,region_6978,region_721,region_7409,region_7707,region_8476,region_9318	Adora3,Aif1,App,C3ar1,Ccl12,Ccl2,Ccl3,Ccl4,Ccl5,Cd300a,Cd74,Cxcl10,Cxcl12,Cxcl2,Dock8,F2rl1,Icam1,Il1a,Jam3,Lgals9,Lrch1,Lyn,Msn,Mtus1,Nckap1l,P2ry12,Ptprj,Ripor2,Slamf8,Tlr2
GO Biological Process	GO:0045785	positive regulation of cell adhesion	155	1.04634e-19	1.34539e-15	8.67993e-18	4.68607	11.5235	54	0.00118141	0.00553619	60	3.1191e-08	0.000401054	6.68424e-06	2.35295	20.3999	48	356	0.0391517	0.134831	region_1073,region_1278,region_1285,region_1314,region_1397,region_158,region_1614,region_1818,region_1985,region_2090,region_2195,region_2217,region_2231,region_2537,region_2687,region_3097,region_310,region_3193,region_37,region_373,region_3806,region_3870,region_4191,region_4235,region_4545,region_470,region_5067,region_5177,region_5209,region_5269,region_5277,region_5590,region_5820,region_59…	Aif1,Apbb1ip,Ccl2,Ccl5,Cd1d1,Cd244,Cd74,Cd83,Cd86,Cdh13,Cxcl12,Disc1,Dock8,Erbb2,Fam49b,Flna,H2-M3,H2-T23,Hlx,Icam1,Igfbp2,Ikzf1,Il12b,Il1b,Il1rl2,Il4ra,Itpkb,Kdr,Kif26b,Lgals9,Lims1,Nck2,Nckap1l,Ndnf,Npnt,Nrp1,Plpp3,Ptprc,Ptprj,Ret,Shh,Stat5a,Tgfb2,Tgfbr2,Tnf,Tnfsf13b,Tnfsf9,Wnt4
GO Biological Process	GO:0030097	hemopoiesis	156	1.08452e-19	1.39447e-15	8.93891e-18	3.85701	17.371	67	0.00178091	0.00686898	213	2.22034e-05	0.285491	0.00134033	1.72014	36.0437	62	629	0.050571	0.0985692	region_102,region_1088,region_1216,region_1279,region_1306,region_1547,region_1608,region_1685,region_210,region_2268,region_2361,region_2397,region_2537,region_2784,region_279,region_2910,region_3097,region_313,region_3393,region_3575,region_3611,region_379,region_4031,region_4178,region_4191,region_4244,region_4335,region_4379,region_4382,region_4504,region_4698,region_4740,region_4765,region_4…	Abca15,Add2,Apobec3,App,Bcl2a1d,Casp8,Cbfa2t3,Cd1d1,Cd74,Cd86,Dact2,Efna2,Epha2,Evi2b,F2rl1,Fam20c,Fcer1g,Fli1,Fut7,Fzd8,Gm13277,Gm13278,Hhex,Ikzf1,Il12b,Irf4,Itpkb,Jam3,Kcp,Kdr,Lrrk1,Ltbr,Lyl1,Lyn,Mef2c,Mertk,Myo1e,Nckap1l,Nfatc1,Ntrk1,Ocstamp,Pdgfra,Plcg2,Plek,Ptprc,Sh3pxd2a,Shh,Spi1,Stat5a,Tal1,Tgfb2,Tgfbr2,Tlr2,Tnf,Tnfrsf11a,Tnfsf9,Trf,Trpm2,Tspan2,Tyro3,Wnt1,Wnt4
GO Biological Process	GO:0032874	positive regulation of stress-activated MAPK cascade	157	1.161e-19	1.49281e-15	9.50834e-18	9.6248	3.11695	30	0.000319556	0.00307566	80	1.27318e-07	0.00163706	2.04632e-05	3.19527	8.13704	26	142	0.0212072	0.183099	region_1859,region_1889,region_2592,region_2687,region_2910,region_2916,region_3736,region_379,region_4191,region_4199,region_4316,region_4331,region_456,region_488,region_5102,region_5735,region_5939,region_6160,region_6430,region_6519,region_655,region_7364,region_748,region_8532,region_8717,region_8778,region_9034,region_9416,region_9431,region_958	App,Card9,Dab2ip,Dusp15,Epha4,F2rl1,Fzd8,Il1b,Ltbr,Map3k20,Mdfic,Met,Ncf1,Nod1,Rassf2,Sash1,Tgfb2,Tlr4,Tlr6,Tlr9,Tnf,Tnfrsf11a,Tnik,Tpd52l1,Trf,Wnt7a
GO Biological Process	GO:0048858	cell projection morphogenesis	158	1.41574e-19	1.82036e-15	1.15213e-17	4.42054	12.8944	57	0.00132196	0.00584376	112	6.96811e-07	0.00895959	7.99963e-05	2.08745	23.9527	50	418	0.040783	0.119617	region_1073,region_1135,region_120,region_1209,region_1299,region_138,region_1467,region_150,region_1571,region_158,region_1607,region_1651,region_1685,region_1859,region_1901,region_2231,region_2268,region_2522,region_2542,region_2743,region_293,region_3159,region_329,region_3296,region_3327,region_3739,region_415,region_4199,region_420,region_4418,region_456,region_466,region_488,region_5177,re…	Adora2a,App,Artn,B3gnt2,Cacna1a,Chrnb2,Cnp,Ctnnd2,Cxcl12,Dab2ip,Dcc,Dcdc2a,Dst,Efna2,Emx1,Epha4,Epha5,Ephb1,Erbb2,Fez1,Fezf1,Fgfr3,Foxd1,Gdf7,Isl1,Lhx4,Lhx9,Lrrk2,Map6,Nes,Neurog2,Nfib,Nptx1,Nr2e1,Nr4a2,Nrp1,Nrp2,Ntrk1,Nyap1,Pam,Pax6,Plxna4,Ptpro,Sema5a,Shh,Tgfb2,Tlr9,Tnik,Tsku,Wnt7a
GO Biological Process	GO:0070201	regulation of establishment of protein localization	159	1.96479e-19	2.52632e-15	1.58888e-17	3.55951	20.5084	73	0.00210256	0.00748411	392	0.000364128	1	0.0119438	1.52839	43.8369	67	765	0.0546493	0.0875817	region_1022,region_1073,region_1147,region_1216,region_1279,region_1294,region_1306,region_1859,region_1889,region_1900,region_1907,region_203,region_2048,region_2116,region_214,region_2190,region_2242,region_2687,region_2716,region_2783,region_2824,region_3008,region_310,region_32,region_3296,region_3532,region_3554,region_37,region_379,region_3936,region_4031,region_4191,region_4343,region_488,…	Adcy5,Adora2a,Agtr1a,Ano1,App,Bglap2,Bmp6,Cabp1,Camk1,Casp4,Ccl2,Ccl3,Ccl5,Cd14,Cd244,Cd300c2,Cemip,Chrm1,Dab2ip,Eda,Epha5,Erbb2,F2r,F2rl1,Flna,Fzd1,Gpr27,H2-T23,Hk1,Hps4,Ica1,Il1a,Il1b,Il1rap,Il4ra,Inhbb,Isl1,Lgals9,Lrp5,Lrrk2,Lyn,Mdfic,Nkx6-1,Nlrp1a,P2rx7,Pde3b,Pkia,Prr5l,Rapgef3,Rbpms,Sema5a,Shh,Sri,Sulf2,Tcaf1,Tgfb2,Tlr2,Tlr4,Tlr6,Tlr9,Tnf,Tnfrsf21,Tnfrsf9,Trpm2,Trpm4,Ttn,Unc93b1
GO Biological Process	GO:0002521	leukocyte differentiation	160	2.57265e-19	3.30792e-15	2.06745e-17	4.67169	11.3449	53	0.00116311	0.00543367	60	3.1191e-08	0.000401054	6.68424e-06	2.35295	20.3999	48	356	0.0391517	0.134831	region_102,region_1216,region_1279,region_1306,region_1547,region_1685,region_210,region_2268,region_2537,region_279,region_2910,region_3097,region_313,region_3393,region_3611,region_379,region_4031,region_4178,region_4191,region_4244,region_4379,region_4382,region_4504,region_4698,region_4740,region_4765,region_488,region_5067,region_5115,region_5177,region_5209,region_5277,region_5386,region_55…	App,Bcl2a1d,Casp8,Cbfa2t3,Cd1d1,Cd74,Cd86,Efna2,Epha2,F2rl1,Fam20c,Fcer1g,Fut7,Fzd8,Gm13277,Gm13278,Hhex,Ikzf1,Il12b,Irf4,Itpkb,Lrrk1,Ltbr,Lyl1,Lyn,Mef2c,Mertk,Nfatc1,Ntrk1,Ocstamp,Plcg2,Ptprc,Sh3pxd2a,Shh,Spi1,Stat5a,Tal1,Tgfbr2,Tlr2,Tnf,Tnfrsf11a,Tnfsf9,Trf,Trpm2,Tspan2,Tyro3,Wnt1,Wnt4
GO Biological Process	GO:0060326	cell chemotaxis	161	3.07255e-19	3.95069e-15	2.45384e-17	8.44217	3.7905	32	0.000388609	0.00328071	70	6.607e-08	0.000849528	1.21361e-05	2.99161	10.028	30	175	0.0244698	0.171429	region_1279,region_1306,region_1474,region_1512,region_158,region_1679,region_1907,region_214,region_2231,region_2361,region_2522,region_2603,region_2687,region_415,region_4178,region_4641,region_4773,region_5089,region_5240,region_5939,region_6417,region_6916,region_7300,region_7342,region_7409,region_7450,region_7641,region_7707,region_8476,region_8763,region_9222,region_9256	Agtr1a,Arhgef16,Ccl12,Ccl2,Ccl3,Ccl4,Ccl5,Cxcl10,Cxcl12,Cxcl16,Cxcl2,Epha2,Ephb1,Fcer1g,Hgf,Il1b,Nckap1l,Nrp1,Pdgfb,Pdgfra,Pik3cd,Pik3cg,Ptpro,S1pr1,Scg2,Sema5a,Slamf8,Tgfb2,Trpm2,Trpm4
GO Biological Process	GO:0048812	neuron projection morphogenesis	162	3.20971e-19	4.12704e-15	2.54756e-17	4.41104	12.6954	56	0.00130156	0.00574123	115	8.58234e-07	0.0110352	9.5958e-05	2.09071	23.437	49	409	0.0399674	0.119804	region_1073,region_1135,region_120,region_1209,region_1299,region_138,region_1467,region_150,region_1571,region_158,region_1607,region_1651,region_1685,region_1859,region_1901,region_2231,region_2268,region_2522,region_2542,region_2743,region_293,region_329,region_3296,region_3327,region_3739,region_415,region_4199,region_420,region_4418,region_456,region_466,region_488,region_5177,region_5191,re…	Adora2a,App,Artn,B3gnt2,Cacna1a,Chrnb2,Cnp,Ctnnd2,Cxcl12,Dab2ip,Dcc,Dcdc2a,Dst,Efna2,Emx1,Epha4,Epha5,Ephb1,Erbb2,Fez1,Fezf1,Fgfr3,Foxd1,Gdf7,Isl1,Lhx4,Lhx9,Lrrk2,Map6,Neurog2,Nfib,Nptx1,Nr2e1,Nr4a2,Nrp1,Nrp2,Ntrk1,Nyap1,Pam,Pax6,Plxna4,Ptpro,Sema5a,Shh,Tgfb2,Tlr9,Tnik,Tsku,Wnt7a
GO Biological Process	GO:0098602	single organism cell adhesion	163	4.27536e-19	5.49726e-15	3.37255e-17	4.38213	12.7792	56	0.00131015	0.00574123	59	2.27607e-08	0.000292657	4.96029e-06	2.24371	24.0673	54	420	0.0440457	0.128571	region_102,region_1088,region_1278,region_1294,region_1314,region_1391,region_158,region_1608,region_1614,region_1818,region_1985,region_217,region_2231,region_2361,region_2537,region_2687,region_279,region_2858,region_2910,region_3097,region_310,region_3193,region_3393,region_37,region_373,region_379,region_4178,region_4191,region_4244,region_4265,region_4335,region_4504,region_5089,region_5115,…	Add2,Antxr1,Apbb1ip,Bcl2a1d,Ccl5,Cd151,Cd1d1,Cd74,Cd86,Cxcl12,Dock8,Elf4,F2rl1,Fcer1g,Fermt3,Flna,Fut7,Fzd8,Gm13277,Gm13278,H2-M3,H2-T23,Icam1,Ikzf1,Il12b,Il1b,Irf4,Itga8,Itpkb,Jam3,Megf10,Mertk,Msn,Npnt,Nrp1,P2rx7,P2ry12,Pdgfra,Perp,Pik3cg,Plek,Plpp3,Ptprc,Ret,Shh,Slc11a1,Stat5a,Stx11,Tgfb2,Tgfbr2,Tnf,Tyro3,Wnt1,Wnt4
GO Biological Process	GO:0032872	regulation of stress-activated MAPK cascade	164	5.30567e-19	6.82203e-15	4.15977e-17	7.6148	4.46499	34	0.00045776	0.00348575	159	5.18576e-06	0.0666785	0.000419361	2.49301	11.6325	29	203	0.0236542	0.142857	region_1859,region_1889,region_2592,region_2687,region_2910,region_2916,region_3736,region_3778,region_379,region_415,region_4191,region_4199,region_4316,region_4331,region_456,region_488,region_5102,region_5735,region_5939,region_5972,region_6160,region_6430,region_6519,region_655,region_7364,region_748,region_7641,region_8532,region_8717,region_8778,region_9034,region_9416,region_9431,region_958	App,Card9,Dab2ip,Dusp15,Epha4,Ephb1,F2rl1,Fzd8,Hgf,Il1b,Ltbr,Map3k20,Mapk8ip1,Mdfic,Met,Ncf1,Nod1,Rassf2,Sash1,Tgfb2,Tlr4,Tlr6,Tlr9,Tnf,Tnfrsf11a,Tnik,Tpd52l1,Trf,Wnt7a
GO Biological Process	GO:0022604	regulation of cell morphogenesis	165	6.59701e-19	8.48244e-15	5.14087e-17	5.03836	9.52692	48	0.000976719	0.00492106	593	0.00188798	1	0.0409371	1.61959	24.6976	40	431	0.0326264	0.0928074	region_1209,region_1314,region_1467,region_158,region_1607,region_1614,region_17,region_1907,region_2057,region_2188,region_2217,region_2242,region_2603,region_269,region_286,region_293,region_3122,region_3137,region_329,region_3327,region_3370,region_37,region_373,region_3870,region_3893,region_4199,region_4260,region_4418,region_456,region_5099,region_5735,region_5872,region_6812,region_6827,re…	Arhgap18,Arhgap44,Cacna1a,Ccl12,Ccl2,Ccl3,Chrnb2,Disc1,Epha4,Fes,Flna,Fmnl1,Fstl4,Golga4,Grin1,Hck,Hpn,Icam1,Kdr,Lims1,Lrrk2,Mgll,Msn,Nfatc4,Nkx6-1,Nr2e1,Nrp1,Ntrk2,Plxna4,Rasal1,Ret,Rgma,Sema5a,Sh3d19,Syt2,Tnik,Ust,Vrk2,Wnt7a,Wtip
GO Biological Process	GO:0035295	tube development	166	6.64949e-19	8.54991e-15	5.15055e-17	3.59215	19.487	70	0.00199784	0.00717654	307	0.000130751	1	0.00547621	1.62521	37.5335	61	655	0.0497553	0.0931298	region_1035,region_1101,region_1135,region_1397,region_150,region_158,region_1901,region_192,region_210,region_2190,region_2231,region_236,region_2361,region_2397,region_2733,region_2823,region_286,region_287,region_313,region_3342,region_3469,region_3611,region_3640,region_4191,region_4199,region_451,region_4677,region_4812,region_4936,region_5099,region_5115,region_5177,region_5269,region_528,r…	Aldh1a2,Casp8,Cxcl12,Dab2ip,Dact2,Eda,Eif4ebp1,Epha2,Epha4,Fat4,Fgfr3,Foxd1,Foxe1,Fzd1,Fzd2,Gata4,Gata5,Gdf7,Hhex,Hlx,Hoxa5,Hoxd11,Hoxd13,Irx3,Kdr,Kif26b,Lama1,Lgr5,Loxl3,Lrp5,Mef2c,Mesp1,Met,Myc,Nfatc1,Nfatc4,Nfia,Nfib,Notch4,Npnt,Nrp1,Pax6,Pdgfra,Prox1,Ret,Rgma,Sema5a,Shh,Sostdc1,Spint1,Tgfb2,Tgfbr2,Tgif1,Thrb,Tnf,Tshz3,Wnt1,Wnt4,Wnt7a,Yap1,Zic5
GO Biological Process	GO:0043405	regulation of MAP kinase activity	167	6.74732e-19	8.6757e-15	5.19503e-17	6.15512	6.49865	40	0.000666255	0.00410088	197	1.57864e-05	0.202982	0.00103036	2.12962	16.9044	36	295	0.0293638	0.122034	region_1073,region_1180,region_1294,region_1464,region_181,region_1859,region_1889,region_2592,region_2687,region_2716,region_2910,region_3778,region_4031,region_4191,region_4248,region_4331,region_4545,region_456,region_5089,region_5277,region_5735,region_5914,region_5972,region_6163,region_6430,region_6519,region_6898,region_7289,region_7303,region_7364,region_748,region_7641,region_8532,region…	Cd300a,Cd74,Dab2ip,Dusp16,Dusp2,Epha4,Erbb2,F2r,Fzd8,Gnai2,Grm4,Hgf,Il1b,Lrrk2,Lyn,Map3k20,Mapk8ip1,Mdfic,Met,P2rx7,Pde5a,Pdgfb,Pik3cg,Ptprc,Ptprj,Sash1,Spred2,Tgfa,Tlr4,Tlr6,Tlr9,Tnf,Tnfrsf11a,Tnik,Tpd52l1,Trf
GO Biological Process	GO:0055074	calcium ion homeostasis	168	9.22593e-19	1.18627e-14	7.06113e-17	5.61518	7.65782	43	0.000785095	0.00440845	214	2.41328e-05	0.3103	0.00145	2.00012	19.9988	40	349	0.0326264	0.114613	region_1013,region_1279,region_1294,region_1306,region_133,region_1345,region_161,region_1907,region_214,region_2280,region_2361,region_2716,region_3082,region_3137,region_3271,region_3327,region_3371,region_3572,region_379,region_4343,region_4418,region_488,region_5089,region_5386,region_5392,region_6089,region_6417,region_6432,region_6663,region_6838,region_6864,region_7300,region_7359,region_7…	1600014C10Rik,Adcy5,Adra1d,Agtr1a,App,C3ar1,Cacna1a,Calb2,Catsper4,Ccl2,Ccl3,Ccl5,Cxcl2,Disc1,Dmpk,F2r,F2rl1,Gna15,Gpr6,Grin1,Hcrtr1,Hrc,Itpr3,Kdr,P2rx7,Pdgfra,Pik3cg,Plcg2,Prkcb,Pth1r,Ptprc,Pvalb,S1pr1,Slc24a4,Tac4,Tmem178,Tmtc2,Trpm2,Trpm4,Trpm8
GO Biological Process	GO:0045089	positive regulation of innate immune response	169	1.12331e-18	1.44435e-14	8.54646e-17	9.30437	3.11681	29	0.000319542	0.00297314	128	1.51603e-06	0.0194932	0.00015229	2.97039	8.07974	24	141	0.0195759	0.170213	region_1216,region_1818,region_1859,region_1889,region_203,region_2116,region_3097,region_310,region_330,region_3386,region_3508,region_3736,region_3936,region_4086,region_4169,region_4316,region_4322,region_4795,region_5277,region_5615,region_5820,region_6430,region_6564,region_721,region_8522,region_8713,region_8762,region_9318,region_9549	Card9,Cd14,Cd74,Cd86,H2-M3,H2-T23,Il12b,Irgm2,Lgals9,Ly96,Mb21d1,Nlrc5,Parp9,Pik3ap1,Rftn1,Stat5a,Ticam2,Tlr2,Tlr4,Tlr6,Tlr9,Trim12c,Unc93b1,Zbp1
GO Biological Process	GO:0050767	regulation of neurogenesis	170	1.16913e-18	1.50326e-14	8.84273e-17	3.55253	19.7043	70	0.00202012	0.00717654	467	0.000707679	1	0.0194847	1.51226	41.6594	63	727	0.0513866	0.0866575	region_1135,region_1209,region_141,region_1467,region_158,region_1607,region_1685,region_17,region_1870,region_192,region_2048,region_2057,region_2188,region_2197,region_2242,region_269,region_286,region_293,region_3122,region_3137,region_3265,region_329,region_3327,region_3611,region_37,region_3806,region_3893,region_4031,region_4199,region_420,region_4265,region_4281,region_4418,region_456,regi…	App,Arhgap44,Asap1,Bex1,Bmp6,Cacna1a,Camk1,Chrnb2,Dab2ip,Disc1,Dlx2,Dusp15,Emx1,Epha3,Epha4,Fes,Fez1,Fezf1,Fgfr3,Flna,Fstl4,Gdf7,Golga4,Grin1,Hgf,Il1rap,Irx3,Isl1,Lrrk2,Lta,Lyn,Mef2c,Mgll,Ndnf,Neurog2,Nfatc4,Nkx6-1,Nr2e1,Nrp1,Ntrk1,Ntrk2,P2ry12,Pax6,Plxna4,Prox1,Ptprf,Rasal1,Ret,Rgma,Sema5a,Shh,Six3,Spint1,Syt2,Tgif1,Tgif2,Tnfrsf21,Tnik,Ust,Wnt7a,Yap1,Zfp804a,Zhx2
GO Biological Process	GO:0030099	myeloid cell differentiation	171	1.19477e-18	1.53624e-14	8.98385e-17	7.1325	4.90712	35	0.000503087	0.00358827	187	1.21186e-05	0.155821	0.000833267	2.34768	12.7786	30	223	0.0244698	0.134529	region_1216,region_210,region_2268,region_2784,region_313,region_3611,region_379,region_4031,region_4191,region_4379,region_4382,region_4698,region_4740,region_4765,region_488,region_5067,region_5209,region_5590,region_5852,region_6110,region_6160,region_6179,region_6296,region_6309,region_6625,region_6734,region_6878,region_721,region_7342,region_7364,region_7409,region_8199,region_8522,region_8…	App,Casp8,Cbfa2t3,Cd86,Efna2,Epha2,Evi2b,F2rl1,Fam20c,Fli1,Hhex,Ikzf1,Irf4,Lrrk1,Ltbr,Lyn,Mef2c,Nckap1l,Nfatc1,Ocstamp,Sh3pxd2a,Spi1,Tal1,Tgfbr2,Tlr2,Tnf,Tnfrsf11a,Tnfsf9,Trf,Tspan2
GO Biological Process	GO:1902105	regulation of leukocyte differentiation	172	1.36813e-18	1.75914e-14	1.02275e-16	4.94419	9.70837	48	0.000995321	0.00492106	57	2.06746e-08	0.000265834	4.66375e-06	2.59237	15.8157	41	276	0.0334421	0.148551	region_1073,region_1135,region_1345,region_1400,region_1818,region_1859,region_1907,region_2537,region_2733,region_2784,region_2916,region_3084,region_3097,region_3359,region_3456,region_4031,region_4191,region_4325,region_4382,region_4650,region_4936,region_5067,region_5177,region_5209,region_5269,region_5277,region_5436,region_5509,region_5590,region_5639,region_5820,region_6018,region_6050,reg…	C1qc,Casp8,Ccl3,Cd1d1,Cd74,Cd83,Duxbl1,Duxbl2,Duxbl3,Erbb2,Evi2b,Fgfr3,H2-M3,Hlx,Ikzf1,Ikzf3,Il12b,Il1rl2,Il4ra,Itpkb,Lgals9,Loxl3,Lyn,Myc,Nckap1l,Ocstamp,Ptprc,Rassf2,Shh,Sox13,Stat5a,Tal1,Tgfbr2,Tlr9,Tmem176a,Tmem176b,Tmem178,Tnf,Tnfsf9,Tyrobp,Zfp608
GO Biological Process	GO:1901342	regulation of vasculature development	173	1.38598e-18	1.7821e-14	1.03011e-16	6.61578	5.59269	37	0.000573374	0.00379332	176	9.59559e-06	0.12338	0.000701023	2.26726	14.555	33	254	0.0269168	0.129921	region_1075,region_158,region_1685,region_2280,region_2509,region_2687,region_2824,region_293,region_3116,region_329,region_33,region_3469,region_451,region_4677,region_4773,region_5852,region_6110,region_6232,region_6769,region_6838,region_6893,region_7342,region_7447,region_7450,region_748,region_753,region_7641,region_7981,region_8476,region_8778,region_8976,region_9048,region_9222,region_941,…	Adamts1,Apela,C3ar1,Ccl2,Cnmd,Cxcl10,Dab2ip,Ddah1,Epha2,Erap1,Gata4,Hgf,Hhex,Hoxa5,Htatip2,Il1a,Il1b,Isl1,Kdr,Notch4,Nr2e1,Nrp1,Ntrk1,Optc,Pde3b,Pdgfb,Prkcb,Ramp2,Rapgef3,Sash1,Sema5a,Tgfbr2,Wnt4
GO Biological Process	GO:0032990	cell part morphogenesis	174	1.4927e-18	1.91932e-14	1.10305e-16	4.19065	13.6017	57	0.00139448	0.00584376	165	5.87217e-06	0.0755043	0.000457602	1.93901	25.7864	50	450	0.040783	0.111111	region_1073,region_1135,region_120,region_1209,region_1299,region_138,region_1467,region_150,region_1571,region_158,region_1607,region_1651,region_1685,region_1859,region_1901,region_2231,region_2268,region_2522,region_2542,region_2743,region_293,region_3159,region_329,region_3296,region_3327,region_3739,region_415,region_4199,region_420,region_4418,region_456,region_466,region_488,region_5177,re…	Adora2a,App,Artn,B3gnt2,Cacna1a,Chrnb2,Cnp,Ctnnd2,Cxcl12,Dab2ip,Dcc,Dcdc2a,Dst,Efna2,Emx1,Epha4,Epha5,Ephb1,Erbb2,Fez1,Fezf1,Fgfr3,Foxd1,Gdf7,Isl1,Lhx4,Lhx9,Lrrk2,Map6,Nes,Neurog2,Nfib,Nptx1,Nr2e1,Nr4a2,Nrp1,Nrp2,Ntrk1,Nyap1,Pam,Pax6,Plxna4,Ptpro,Sema5a,Shh,Tgfb2,Tlr9,Tnik,Tsku,Wnt7a
GO Biological Process	GO:0019882	antigen processing and presentation	175	1.49517e-18	1.9225e-14	1.09857e-16	12.5288	1.91559	24	0.00019639	0.00246053	100	3.71958e-07	0.00478264	4.78264e-05	3.81115	4.98537	19	87	0.0154976	0.218391	region_1110,region_1163,region_1314,region_136,region_157,region_1614,region_1766,region_1818,region_2116,region_310,region_3189,region_33,region_373,region_3936,region_4158,region_4178,region_4548,region_5277,region_6018,region_6425,region_7965,region_9108,region_9409,region_9549	Cd1d1,Cd74,Erap1,Fcer1g,H2-Ab1,H2-M3,H2-Q4,H2-Q6,H2-Q7,H2-T22,H2-T23,H2-T24,Icam1,Psmb8,Psme1,Rab32,Rftn1,Slc11a1,Unc93b1
GO Biological Process	GO:0050920	regulation of chemotaxis	176	1.82671e-18	2.34878e-14	1.33454e-16	7.92559	4.03755	32	0.000413938	0.00328071	89	1.83247e-07	0.00235619	2.6474e-05	2.86083	10.4865	30	183	0.0244698	0.163934	region_1088,region_1209,region_1325,region_1474,region_158,region_1607,region_1907,region_2231,region_2280,region_2361,region_2603,region_3112,region_379,region_4031,region_4545,region_4641,region_4773,region_5277,region_5723,region_6417,region_6519,region_6838,region_6916,region_6978,region_7409,region_7450,region_7707,region_8476,region_8532,region_9222,region_9246,region_9256	Aif1,Artn,C3ar1,Ccl12,Ccl2,Ccl3,Ccl4,Ccl5,Cd74,Cdh13,Cxcl10,Cxcl12,Cxcl2,F2rl1,Jam3,Kdr,Lyn,Met,Mtus1,Nckap1l,Nrp1,Pdgfb,Pdgfra,Plxna4,Ptprj,Ripor2,S1pr1,Scg2,Sema5a,Slamf8
GO Biological Process	GO:0071396	cellular response to lipid	177	2.06264e-18	2.65214e-14	1.49838e-16	4.79224	10.2249	49	0.00104827	0.00502358	471	0.000715193	1	0.0195243	1.65842	26.5313	44	463	0.0358891	0.0950324	region_1101,region_1314,region_1374,region_1614,region_1637,region_1679,region_1859,region_1907,region_203,region_212,region_2603,region_2687,region_287,region_293,region_3265,region_329,region_3386,region_3611,region_373,region_375,region_4031,region_4086,region_4169,region_4191,region_4343,region_4773,region_4812,region_507,region_5074,region_5099,region_5820,region_6417,region_6430,region_6812…	Abcb4,Adamts13,Adcy5,Agtr1a,Aldh1a2,Ccl12,Ccl2,Ccl3,Ccl5,Cd14,Cd86,Cldn1,Cxcl10,Cxcl16,Cxcl2,Dab2ip,Eif4ebp1,Epha3,Epha5,Ffar3,Gjb2,Icam1,Il12b,Il1b,Irgm2,Isl1,Ldlr,Ly96,Lyn,Mef2c,Msn,Nfatc4,Nfkb1,Nr2e1,Nr2f1,Nr4a2,P2ry6,Ret,Thrb,Ticam2,Tlr4,Tlr9,Tnf,Yap1
GO Biological Process	GO:0050714	positive regulation of protein secretion	178	2.07469e-18	2.66764e-14	1.49868e-16	6.75762	5.32732	36	0.000546168	0.00369079	172	8.28632e-06	0.106546	0.00061945	2.31715	13.8101	32	241	0.0261011	0.13278	region_1216,region_1279,region_1294,region_1306,region_1900,region_1907,region_203,region_2048,region_2116,region_214,region_2242,region_2687,region_2716,region_2783,region_2824,region_310,region_3296,region_3554,region_379,region_3936,region_4191,region_5582,region_5939,region_6430,region_6860,region_721,region_7300,region_7906,region_81,region_9004,region_9157,region_9206,region_9318,region_932…	Adora2a,Agtr1a,Ano1,Bglap2,Casp4,Ccl3,Cd14,Cd244,Cd300c2,F2r,F2rl1,Gpr27,H2-T23,Hk1,Il1a,Il1b,Il1rap,Il4ra,Isl1,Lgals9,Nkx6-1,Nlrp1a,P2rx7,Sri,Tgfb2,Tlr2,Tlr4,Tnf,Trpm2,Trpm4,Ttn,Unc93b1
GO Biological Process	GO:0071417	cellular response to organonitrogen compound	179	2.28826e-18	2.94225e-14	1.64371e-16	4.98352	9.43109	47	0.000966895	0.00481854	568	0.00159233	1	0.0360461	1.63476	24.4684	40	427	0.0326264	0.0936768	region_1216,region_1279,region_1306,region_1314,region_1374,region_1614,region_1685,region_1793,region_1859,region_1889,region_2057,region_2242,region_2361,region_287,region_306,region_3097,region_3266,region_3327,region_3611,region_373,region_375,region_4072,region_4191,region_4265,region_4418,region_488,region_5089,region_51,region_5115,region_5582,region_5585,region_5735,region_6430,region_655…	Abcb4,Agtr1a,Aif1,App,Bglap2,Cacna1a,Casp4,Casp7,Ccl2,Cyba,Eif4ebp1,Epha4,Ghr,Gjb2,Glra1,Icam1,Inhbb,Lamtor5,Lrrk2,Mef2c,Nfkb1,Nkx6-1,Nod1,Nr4a2,Ntrk1,Ntrk2,P2ry12,Pde3b,Pdgfra,Pik3cg,Rapgef3,Stat5a,Tbc1d4,Tlr2,Tlr4,Tlr6,Tlr9,Tnf,Trpm2,Wnt1
GO Biological Process	GO:0046330	positive regulation of JNK cascade	180	2.33967e-18	3.00835e-14	1.6713e-16	10.094	2.67485	27	0.000274231	0.00276809	77	9.45598e-08	0.00121585	1.57903e-05	3.433	6.99098	24	122	0.0195759	0.196721	region_1859,region_1889,region_2592,region_2687,region_2910,region_2916,region_3736,region_379,region_4191,region_4199,region_4316,region_4331,region_456,region_488,region_5102,region_5735,region_6160,region_6430,region_655,region_7364,region_748,region_8717,region_8778,region_9034,region_9416,region_9431,region_958	App,Card9,Dab2ip,Dusp15,Epha4,F2rl1,Fzd8,Il1b,Ltbr,Map3k20,Mdfic,Ncf1,Nod1,Rassf2,Sash1,Tlr4,Tlr6,Tlr9,Tnf,Tnfrsf11a,Tnik,Tpd52l1,Trf,Wnt7a
GO Biological Process	GO:0035239	tube morphogenesis	181	2.48151e-18	3.19073e-14	1.76283e-16	4.14217	13.7609	57	0.0014108	0.00584376	96	3.04099e-07	0.0039101	4.07303e-05	2.16481	22.6347	49	395	0.0399674	0.124051	region_1035,region_1101,region_1135,region_1397,region_150,region_158,region_1901,region_192,region_210,region_2190,region_2231,region_236,region_2361,region_286,region_313,region_3342,region_3469,region_3611,region_451,region_4677,region_4936,region_5099,region_5115,region_5177,region_5269,region_528,region_5534,region_5735,region_5852,region_5879,region_5939,region_5964,region_6054,region_6100,…	Aldh1a2,Casp8,Cxcl12,Dab2ip,Eda,Epha2,Epha4,Fat4,Fgfr3,Foxd1,Fzd1,Fzd2,Gata4,Gdf7,Hhex,Hlx,Hoxa5,Hoxd11,Hoxd13,Irx3,Kdr,Kif26b,Lama1,Lgr5,Lrp5,Mef2c,Mesp1,Met,Myc,Nfatc1,Nfatc4,Nfib,Notch4,Npnt,Nrp1,Pdgfra,Ret,Rgma,Sema5a,Shh,Sostdc1,Spint1,Tgfb2,Tgfbr2,Tgif1,Wnt1,Wnt4,Yap1,Zic5
GO Biological Process	GO:0050863	regulation of T cell activation	182	2.7717e-18	3.56385e-14	1.95816e-16	4.85432	9.8881	48	0.00101375	0.00492106	53	1.29046e-08	0.000165927	3.13071e-06	2.59909	16.1595	42	282	0.0342577	0.148936	region_1073,region_1278,region_1285,region_1400,region_1818,region_2090,region_2195,region_2537,region_2687,region_2733,region_3097,region_310,region_3112,region_3296,region_3359,region_3456,region_4235,region_4325,region_470,region_5067,region_5177,region_5209,region_5269,region_5277,region_5509,region_5590,region_5639,region_581,region_5820,region_5914,region_6018,region_6050,region_6100,region…	Adora2a,Aif1,Ccl2,Ccl5,Cd1d1,Cd244,Cd300a,Cd74,Cd83,Cd86,Dock8,Duxbl1,Duxbl2,Duxbl3,Erbb2,Fam49b,H2-M3,H2-T23,Hlx,Igfbp2,Ikzf1,Il12b,Il1b,Il1rl2,Il4ra,Itpkb,Lgals9,Loxl3,Nck2,Nckap1l,Pde5a,Ptprc,Ripor2,Shh,Sox13,Stat5a,Tgfbr2,Tnfrsf21,Tnfsf13b,Tnfsf9,Vsir,Zfp608
GO Biological Process	GO:0032956	regulation of actin cytoskeleton organization	183	3.43269e-18	4.41375e-14	2.41189e-16	6.03774	6.45937	39	0.000662227	0.00399836	326	0.000167472	1	0.00660537	1.96548	16.7898	33	293	0.0269168	0.112628	region_1060,region_1088,region_1216,region_1279,region_1306,region_1314,region_158,region_1586,region_1608,region_1614,region_2308,region_269,region_3265,region_3370,region_3611,region_37,region_373,region_379,region_3893,region_4235,region_4335,region_4346,region_5939,region_6519,region_721,region_7409,region_7450,region_7467,region_7469,region_753,region_7990,region_809,region_823,region_8337,r…	Add2,Arhgap18,Arhgap44,Arhgef19,Arpc1b,Eln,Epha3,Epha5,F11r,F2rl1,Fes,Flna,Gpm6b,Hck,Icam1,Jam3,Mef2c,Met,Myo1f,Nck2,Nckap1l,Nrp1,Plek,Prox1,Rapgef3,S1pr1,Sema5a,Sh3pxd2b,Tgfb2,Tlr2,Tmod1,Trpm2,Wnt4
GO Biological Process	GO:0045765	regulation of angiogenesis	184	3.48436e-18	4.48019e-14	2.43489e-16	6.88397	5.08427	35	0.00052125	0.00358827	174	9.18207e-06	0.118063	0.000678523	2.34192	13.237	31	231	0.0252855	0.134199	region_1075,region_158,region_1685,region_2280,region_2509,region_2687,region_2824,region_293,region_3116,region_329,region_33,region_3469,region_451,region_4677,region_4773,region_5852,region_6110,region_6232,region_6769,region_6838,region_6893,region_7342,region_7447,region_7450,region_748,region_753,region_7641,region_7981,region_8476,region_8778,region_8976,region_9048,region_941,region_9421,…	Adamts1,Apela,C3ar1,Ccl2,Cnmd,Cxcl10,Dab2ip,Ddah1,Epha2,Erap1,Gata4,Hgf,Hhex,Hoxa5,Htatip2,Il1a,Il1b,Isl1,Kdr,Notch4,Nr2e1,Nrp1,Ntrk1,Optc,Pde3b,Prkcb,Ramp2,Rapgef3,Sash1,Sema5a,Tgfbr2
GO Biological Process	GO:0032970	regulation of actin filament-based process	185	4.6594e-18	5.99105e-14	3.23841e-16	5.65116	7.25515	41	0.000743813	0.0042034	370	0.0003252	1	0.0113011	1.8565	18.8527	35	329	0.0285481	0.106383	region_1060,region_1088,region_1216,region_1279,region_1306,region_1314,region_158,region_1586,region_1608,region_1614,region_214,region_2308,region_269,region_2783,region_3265,region_3370,region_3611,region_37,region_373,region_379,region_3893,region_4235,region_4335,region_4346,region_5939,region_6519,region_721,region_7409,region_7450,region_7467,region_7469,region_753,region_7990,region_809,r…	Add2,Arhgap18,Arhgap44,Arhgef19,Arpc1b,Eln,Epha3,Epha5,F11r,F2rl1,Fes,Flna,Gpm6b,Hck,Icam1,Jam3,Mef2c,Met,Myo1f,Nck2,Nckap1l,Nrp1,Plek,Prox1,Rapgef3,S1pr1,Sema5a,Sh3pxd2b,Sri,Tgfb2,Tlr2,Tmod1,Trpm2,Trpm4,Wnt4
GO Biological Process	GO:0070374	positive regulation of ERK1 and ERK2 cascade	186	6.39042e-18	8.21681e-14	4.41764e-16	7.57922	4.22207	32	0.000432855	0.00328071	232	3.67397e-05	0.472398	0.0020362	2.37554	10.9449	26	191	0.0212072	0.136126	region_1135,region_1216,region_1314,region_133,region_158,region_1614,region_1685,region_1907,region_2327,region_2361,region_2478,region_2603,region_2716,region_3469,region_373,region_379,region_4677,region_488,region_5277,region_6089,region_6417,region_6430,region_655,region_6838,region_6916,region_721,region_782,region_8476,region_9034,region_9222,region_9416,region_9528	Ackr3,App,Ccl12,Ccl2,Ccl3,Ccl4,Ccl5,Cd74,F2r,F2rl1,Fgfr3,Gata4,Hcrtr1,Icam1,Kdr,Nod1,Npnt,Nrp1,Ntrk1,Pdgfb,Pdgfra,Pla2g5,St5,Tlr2,Tlr4,Tnfrsf11a
GO Biological Process	GO:0006874	cellular calcium ion homeostasis	187	7.18491e-18	9.23835e-14	4.94029e-16	5.57949	7.34835	41	0.000753367	0.0042034	240	4.78418e-05	0.61515	0.00256313	1.97952	19.1965	38	335	0.0309951	0.113433	region_1013,region_1279,region_1294,region_1306,region_133,region_1345,region_1907,region_214,region_2280,region_2361,region_2716,region_3082,region_3137,region_3271,region_3327,region_3371,region_3572,region_379,region_4343,region_4418,region_488,region_5089,region_5386,region_5392,region_6089,region_6417,region_6432,region_6663,region_6864,region_7300,region_7359,region_7693,region_7707,region_…	1600014C10Rik,Adcy5,Adra1d,Agtr1a,App,C3ar1,Cacna1a,Calb2,Catsper4,Ccl2,Ccl3,Ccl5,Cxcl2,Disc1,Dmpk,F2r,F2rl1,Gna15,Gpr6,Grin1,Hcrtr1,Hrc,Itpr3,P2rx7,Pdgfra,Pik3cg,Plcg2,Prkcb,Pth1r,Ptprc,Pvalb,S1pr1,Slc24a4,Tac4,Tmem178,Trpm2,Trpm4,Trpm8
GO Biological Process	GO:0031344	regulation of cell projection organization	188	7.73108e-18	9.94063e-14	5.28757e-16	4.16317	13.2111	55	0.00135443	0.00563871	1001	0.0120957	1	0.155371	1.39842	34.3246	48	599	0.0391517	0.0801336	region_1209,region_1279,region_1294,region_1306,region_1314,region_1467,region_158,region_1607,region_1614,region_1685,region_17,region_2048,region_2057,region_2188,region_2242,region_269,region_286,region_293,region_3112,region_3122,region_3137,region_3265,region_329,region_3327,region_3611,region_37,region_373,region_379,region_3806,region_3893,region_4031,region_4199,region_4281,region_4418,re…	Arhgap44,Asap1,Cacna1a,Camk1,Chrnb2,Dab2ip,Dcdc2a,Disc1,Epha2,Epha3,Epha4,Eps8l2,F2rl1,Fes,Fez1,Flna,Fstl4,Golga4,Grin1,Hgf,Icam1,Il1rap,Lrrk2,Lyn,Mef2c,Mgll,Ndnf,Nfatc4,Nkx6-1,Nr2e1,Nrp1,Ntrk1,Ntrk2,P2rx7,Plxna4,Ptprf,Rasal1,Ret,Rgma,Ripor2,Sema5a,Syt2,Tnik,Trpm2,Ust,Wnt1,Wnt7a,Zfp804a
GO Biological Process	GO:0002009	morphogenesis of an epithelium	189	8.27583e-18	1.06411e-13	5.63019e-16	3.80546	16.0296	61	0.00164339	0.00625385	160	5.19196e-06	0.0667582	0.000417239	1.89228	28.537	54	498	0.0440457	0.108434	region_1035,region_1101,region_1135,region_1154,region_1397,region_150,region_158,region_192,region_210,region_2231,region_236,region_2712,region_286,region_3097,region_313,region_3342,region_3469,region_3611,region_37,region_4199,region_451,region_4677,region_4936,region_5099,region_5115,region_5177,region_528,region_5534,region_5735,region_5852,region_5879,region_5939,region_5964,region_6054,re…	Aldh1a2,Casp8,Cxcl12,Epha2,Epha4,Fat4,Fgfr3,Flna,Foxd1,Foxe1,Fzd1,Fzd2,Gata4,Gdf7,Hhex,Hoxa5,Hoxd11,Hoxd13,Irx3,Kdf1,Kdr,Kif26b,Lama1,Lgr5,Lrp5,Mef2c,Mesp1,Met,Msn,Myc,Nfatc1,Nfatc4,Notch4,Npnt,Nrp1,Ophn1,Pdgfb,Prox1,Ret,Rgma,Sema5a,Shh,Sostdc1,Spint1,Stat5a,Tcf15,Tgfb2,Tgfbr2,Tgif1,Wnt1,Wnt4,Wnt7a,Yap1,Zic5
GO Biological Process	GO:0046328	regulation of JNK cascade	190	9.10986e-18	1.17135e-13	6.16498e-16	8.17616	3.6692	30	0.000376174	0.00307566	146	3.19737e-06	0.0411118	0.000281587	2.71693	9.56962	26	167	0.0212072	0.155689	region_1859,region_1889,region_2592,region_2687,region_2910,region_2916,region_3736,region_3778,region_379,region_415,region_4191,region_4199,region_4316,region_4331,region_456,region_488,region_5102,region_5735,region_5972,region_6160,region_6430,region_655,region_7364,region_748,region_8717,region_8778,region_9034,region_9416,region_9431,region_958	App,Card9,Dab2ip,Dusp15,Epha4,Ephb1,F2rl1,Fzd8,Il1b,Ltbr,Map3k20,Mapk8ip1,Mdfic,Ncf1,Nod1,Rassf2,Sash1,Tlr4,Tlr6,Tlr9,Tnf,Tnfrsf11a,Tnik,Tpd52l1,Trf,Wnt7a
GO Biological Process	GO:0051222	positive regulation of protein transport	191	1.01606e-17	1.30645e-13	6.84005e-16	4.00975	14.2154	57	0.00145739	0.00584376	200	1.6467e-05	0.211733	0.00105866	1.85417	27.5055	51	480	0.0415987	0.10625	region_1022,region_1073,region_1147,region_1216,region_1279,region_1294,region_1306,region_1859,region_1900,region_1907,region_203,region_2048,region_2116,region_214,region_2190,region_2242,region_2687,region_2716,region_2783,region_2824,region_310,region_32,region_3296,region_3532,region_3554,region_37,region_379,region_3936,region_4191,region_488,region_4965,region_5177,region_5582,region_5939,…	Adora2a,Agtr1a,Ano1,App,Bglap2,Bmp6,Camk1,Casp4,Ccl2,Ccl3,Cd14,Cd244,Cd300c2,Cemip,Chrm1,Eda,Erbb2,F2r,F2rl1,Flna,Gpr27,H2-T23,Hk1,Hps4,Il1a,Il1b,Il1rap,Il4ra,Isl1,Lgals9,Lrrk2,Nkx6-1,Nlrp1a,P2rx7,Prr5l,Rapgef3,Rbpms,Sema5a,Shh,Sri,Sulf2,Tcaf1,Tgfb2,Tlr2,Tlr4,Tlr9,Tnf,Trpm2,Trpm4,Ttn,Unc93b1
GO Biological Process	GO:0007423	sensory organ development	192	1.12114e-17	1.44156e-13	7.50815e-16	3.73052	16.6197	62	0.00170388	0.00635637	263	7.10586e-05	0.913671	0.00347403	1.69457	33.6369	57	587	0.0464927	0.0971039	region_1060,region_1101,region_1135,region_1375,region_1571,region_158,region_192,region_198,region_2057,region_236,region_2361,region_279,region_2858,region_293,region_310,region_3108,region_3112,region_3151,region_3159,region_329,region_3652,region_3796,region_3918,region_4102,region_415,region_4156,region_4936,region_5115,region_5177,region_5209,region_528,region_538,region_5488,region_5585,re…	Aldh1a2,Aqp5,Bfsp1,Bhlhe23,Bmp6,C1qb,C1qtnf5,Crb1,Epha2,Ephb1,Fat4,Fgfr3,Fjx1,Foxl2,Fzd2,Gjb2,H2-T23,Hpn,Igfbp7,Ikzf1,Inhbb,Itga8,Kdr,Lama1,Lamc3,Lgr5,Lrig3,Lrp5,Maf,Mertk,Myc,Nes,Nr2e1,Nrp1,Ntrk2,Otx1,Pax6,Pdgfb,Pdgfra,Pfdn5,Prox1,Ret,Ripor2,Sh3pxd2b,Shh,Six3,Six4,Sobp,Tcf15,Tgfb2,Tgfbr2,Tgif1,Tgif2,Tifab,Tmod1,Tsku,Wnt1
GO Biological Process	GO:0071219	cellular response to molecule of bacterial origin	193	1.18466e-17	1.52324e-13	7.89241e-16	8.09538	3.70582	30	0.000379928	0.00307566	183	1.1077e-05	0.142427	0.000778292	2.59688	9.62692	25	168	0.0203915	0.14881	region_1216,region_1314,region_1374,region_1614,region_1679,region_1859,region_1889,region_1907,region_203,region_2603,region_2687,region_3386,region_3611,region_373,region_375,region_4031,region_4086,region_4169,region_4191,region_4773,region_5820,region_6417,region_6430,region_7165,region_721,region_7707,region_8476,region_8522,region_8762,region_8778	Adamts13,Ccl12,Ccl2,Ccl3,Ccl5,Cd14,Cd86,Cxcl10,Cxcl16,Cxcl2,Dab2ip,Icam1,Il12b,Il1b,Irgm2,Ly96,Lyn,Mef2c,Nfkb1,Ticam2,Tlr2,Tlr4,Tlr6,Tlr9,Tnf
GO Biological Process	GO:0048514	blood vessel morphogenesis	194	1.56051e-17	2.0065e-13	1.03428e-15	4.23069	12.5275	53	0.00128434	0.00543367	92	2.12665e-07	0.00273445	2.97223e-05	2.17053	23.0358	50	402	0.040783	0.124378	region_1075,region_1088,region_1141,region_1474,region_158,region_181,region_2057,region_2231,region_2361,region_2603,region_2910,region_3469,region_37,region_3806,region_415,region_4199,region_451,region_4545,region_4677,region_5089,region_5099,region_5177,region_5852,region_5939,region_5961,region_6110,region_6232,region_6318,region_6625,region_6734,region_6838,region_6853,region_6893,region_73…	Ackr3,Casp8,Ccl12,Ccl2,Cdh13,Cxcl12,Dab2ip,Epha2,Ephb1,Flna,Fzd8,Gata4,Hhex,Htatip2,Jam3,Kdr,Lama1,Lrp5,Mcam,Myo1e,Ndnf,Nfatc4,Notch4,Nrp1,Nrp2,Ntrk2,Pde3b,Pdgfb,Pdgfra,Pik3cg,Plcd1,Prox1,Ptprj,Ramp1,Ramp2,Rapgef3,Rnf213,S1pr1,Scg2,Sema5a,Shh,Spi1,Tal1,Tgfa,Tgfb2,Tgfbr2,Thsd7a,Tnfaip2,Wnt7a,Yap1
GO Biological Process	GO:0070838	divalent metal ion transport	195	1.69055e-17	2.17371e-13	1.11472e-15	6.10885	6.05679	37	0.000620954	0.00379332	429	0.000522965	1	0.0156743	1.9107	15.7011	30	274	0.0244698	0.109489	region_1075,region_1279,region_1294,region_1306,region_1467,region_1907,region_210,region_214,region_2716,region_2739,region_2783,region_3014,region_313,region_3137,region_3327,region_3371,region_3572,region_3712,region_4265,region_4367,region_4418,region_5262,region_5386,region_5392,region_5771,region_5961,region_6108,region_6309,region_6417,region_6663,region_6864,region_7364,region_7981,region…	Cacna1a,Cacng2,Cacng3,Catsper4,Ccl3,Ccl5,Chrnb2,Cracr2b,F2r,Grin1,Grm7,Itpr3,Nfatc1,Orai3,P2rx7,P2ry12,Plcg2,Prkcb,Ptprc,Ramp1,Ramp2,Slc11a1,Slc24a4,Slc30a3,Slc39a8,Sri,Trf,Trpm2,Trpm4,Trpm8
GO Biological Process	GO:0034612	response to tumor necrosis factor	196	1.91688e-17	2.46472e-13	1.25751e-15	7.94918	3.77398	30	0.000386916	0.00307566	164	5.56745e-06	0.0715863	0.000436502	2.63795	9.85614	26	172	0.0212072	0.151163	region_1314,region_1614,region_1679,region_1907,region_203,region_2138,region_2217,region_2603,region_306,region_373,region_3784,region_3870,region_4191,region_4382,region_594,region_6160,region_6417,region_6916,region_7165,region_7220,region_782,region_8199,region_8476,region_8583,region_8770,region_8778,region_8824,region_9416,region_9422,region_985	Adamts13,Adamts7,Birc3,Casp8,Ccl12,Ccl2,Ccl3,Ccl4,Ccl5,Cd14,Cldn1,Cxcl16,Cyba,Dab2ip,Icam1,Krt8,Lims1,Ltbr,Npnt,Ocln,Ocstamp,Tank,Tnf,Tnfrsf11a,Tnfrsf21,Tnfrsf9
GO Biological Process	GO:0016337	single organismal cell-cell adhesion	197	2.02718e-17	2.60655e-13	1.32312e-15	4.27624	12.1602	52	0.00124669	0.00533115	78	9.68057e-08	0.00124473	1.5958e-05	2.2259	22.4628	50	392	0.040783	0.127551	region_102,region_1088,region_1278,region_1294,region_1314,region_1391,region_1608,region_1614,region_1818,region_1985,region_217,region_2231,region_2361,region_2537,region_2687,region_2910,region_3097,region_310,region_3193,region_3393,region_37,region_373,region_379,region_4178,region_4191,region_4244,region_4265,region_4335,region_4504,region_5089,region_5115,region_5177,region_5209,region_521…	Add2,Apbb1ip,Bcl2a1d,Ccl5,Cd151,Cd1d1,Cd74,Cd86,Cxcl12,Dock8,Elf4,F2rl1,Fcer1g,Fermt3,Flna,Fut7,Fzd8,Gm13277,Gm13278,H2-M3,H2-T23,Icam1,Ikzf1,Il12b,Il1b,Irf4,Itpkb,Jam3,Megf10,Msn,Npnt,P2rx7,P2ry12,Pdgfra,Perp,Pik3cg,Plek,Plpp3,Ptprc,Ret,Shh,Slc11a1,Stat5a,Stx11,Tgfb2,Tgfbr2,Tnf,Tyro3,Wnt1,Wnt4
GO Biological Process	GO:1904951	positive regulation of establishment of protein localization	198	2.06609e-17	2.65658e-13	1.34171e-15	3.94419	14.4516	57	0.00148161	0.00584376	220	3.02215e-05	0.388589	0.00176631	1.81264	28.1358	51	491	0.0415987	0.10387	region_1022,region_1073,region_1147,region_1216,region_1279,region_1294,region_1306,region_1859,region_1900,region_1907,region_203,region_2048,region_2116,region_214,region_2190,region_2242,region_2687,region_2716,region_2783,region_2824,region_310,region_32,region_3296,region_3532,region_3554,region_37,region_379,region_3936,region_4191,region_488,region_4965,region_5177,region_5582,region_5939,…	Adora2a,Agtr1a,Ano1,App,Bglap2,Bmp6,Camk1,Casp4,Ccl2,Ccl3,Cd14,Cd244,Cd300c2,Cemip,Chrm1,Eda,Erbb2,F2r,F2rl1,Flna,Gpr27,H2-T23,Hk1,Hps4,Il1a,Il1b,Il1rap,Il4ra,Isl1,Lgals9,Lrrk2,Nkx6-1,Nlrp1a,P2rx7,Prr5l,Rapgef3,Rbpms,Sema5a,Shh,Sri,Sulf2,Tcaf1,Tgfb2,Tlr2,Tlr4,Tlr9,Tnf,Trpm2,Trpm4,Ttn,Unc93b1
GO Biological Process	GO:0044708	single-organism behavior	199	2.08526e-17	2.68123e-13	1.34735e-15	4.51463	10.8536	49	0.00111273	0.00502358	630	0.00243768	1	0.0497518	1.58646	25.8437	41	451	0.0334421	0.0909091	region_1060,region_1072,region_1216,region_138,region_1467,region_1685,region_188,region_2057,region_212,region_231,region_2743,region_2858,region_293,region_2993,region_3137,region_3177,region_329,region_3327,region_3342,region_3523,region_3561,region_3611,region_402,region_4072,region_4156,region_4418,region_4628,region_488,region_5392,region_5430,region_5560,region_5665,region_5735,region_6108…	Adam22,Aff2,App,Cacna1a,Chrnb2,Chst10,Cnp,Comt,Ctnnd2,Dbh,Dcdc2a,Dmrt3,Epha4,Gad1,Glra1,Grin1,Grm4,Grm7,Hoxd10,Hoxd9,Itga8,Itpr3,Klhl1,Ldlr,Lrrk2,Mef2c,Met,Nr2e1,Nr4a2,Ntrk1,Ntrk2,Osm,Pax5,Prkar2b,Rnf180,Slc6a1,Snca,Tifab,Tlr2,Tmod1,Unc79
GO Biological Process	GO:0072511	divalent inorganic cation transport	200	2.37241e-17	3.05045e-13	1.52522e-15	6.04269	6.1231	37	0.000627753	0.00379332	451	0.000626404	1	0.0178588	1.89001	15.873	30	277	0.0244698	0.108303	region_1075,region_1279,region_1294,region_1306,region_1467,region_1907,region_210,region_214,region_2716,region_2739,region_2783,region_3014,region_313,region_3137,region_3327,region_3371,region_3572,region_3712,region_4265,region_4367,region_4418,region_5262,region_5386,region_5392,region_5771,region_5961,region_6108,region_6309,region_6417,region_6663,region_6864,region_7364,region_7981,region…	Cacna1a,Cacng2,Cacng3,Catsper4,Ccl3,Ccl5,Chrnb2,Cracr2b,F2r,Grin1,Grm7,Itpr3,Nfatc1,Orai3,P2rx7,P2ry12,Plcg2,Prkcb,Ptprc,Ramp1,Ramp2,Slc11a1,Slc24a4,Slc30a3,Slc39a8,Sri,Trf,Trpm2,Trpm4,Trpm8
GO Biological Process	GO:0002757	immune response-activating signal transduction	201	2.5047e-17	3.22054e-13	1.60226e-15	8.25028	3.51503	29	0.000360368	0.00297314	129	1.58503e-06	0.0203803	0.000157987	2.81818	9.2258	26	161	0.0212072	0.161491	region_1216,region_1859,region_1889,region_203,region_2116,region_2280,region_3386,region_3611,region_3936,region_4031,region_4086,region_4169,region_4178,region_4244,region_5386,region_6430,region_6564,region_721,region_7349,region_7409,region_7981,region_8012,region_8522,region_8543,region_8713,region_8762,region_9023,region_9549,region_985	Bcl2a1d,C3ar1,Cd14,Cd86,Fcer1g,Irgm2,Lat2,Ly96,Lyn,Mef2c,Myo1g,Nckap1l,Nfatc2,Pik3ap1,Plcg2,Prkcb,Ptprc,Rftn1,Ticam2,Tlr2,Tlr4,Tlr6,Tlr9,Tnfrsf21,Trim12c,Unc93b1
GO Biological Process	GO:0071216	cellular response to biotic stimulus	202	3.02516e-17	3.88974e-13	1.92562e-15	7.47363	4.14792	31	0.000425253	0.00317818	218	2.7861e-05	0.358237	0.00164329	2.41344	10.773	26	188	0.0212072	0.138298	region_1216,region_1314,region_1374,region_1614,region_1679,region_1859,region_1889,region_1907,region_203,region_2603,region_2687,region_3386,region_3611,region_373,region_375,region_4031,region_4086,region_4169,region_4191,region_4773,region_5820,region_6417,region_6430,region_7165,region_721,region_7707,region_8476,region_8522,region_8537,region_8762,region_8778	Abcb4,Adamts13,Ccl12,Ccl2,Ccl3,Ccl5,Cd14,Cd86,Cxcl10,Cxcl16,Cxcl2,Dab2ip,Icam1,Il12b,Il1b,Irgm2,Ly96,Lyn,Mef2c,Nfkb1,Ticam2,Tlr2,Tlr4,Tlr6,Tlr9,Tnf
GO Biological Process	GO:0030001	metal ion transport	203	4.16209e-17	5.35161e-13	2.63626e-15	4.12988	12.8333	53	0.0013157	0.00543367	1273	0.0262642	1	0.265282	1.34699	33.4077	45	583	0.0367047	0.077187	region_1075,region_1279,region_1294,region_1306,region_1467,region_1615,region_1653,region_1907,region_210,region_214,region_2628,region_2716,region_2739,region_2783,region_300,region_3014,region_313,region_3137,region_3191,region_3327,region_3371,region_3572,region_3712,region_4265,region_4277,region_4367,region_4418,region_5262,region_5386,region_5392,region_5771,region_5961,region_5977,region_…	Cacna1a,Cacng2,Cacng3,Catsper4,Ccl3,Ccl5,Chrnb2,Cracr2b,F2r,Grin1,Grm7,Hpn,Itpr3,Kcnh3,Kcnj8,Kcnk13,Kcnk15,Kcnk18,Kcnmb4,Kcnn2,Nfatc1,Orai3,P2rx7,P2ry12,Plcg2,Prkcb,Ptprc,Ramp1,Ramp2,Scn4b,Slc11a1,Slc12a4,Slc24a4,Slc30a3,Slc38a1,Slc39a8,Slc4a4,Slc5a10,Slc6a15,Sri,Trf,Trpm2,Trpm4,Trpm5,Trpm8
GO Biological Process	GO:0002764	immune response-regulating signaling pathway	204	4.96223e-17	6.38043e-13	3.12766e-15	7.6669	3.91292	30	0.000401161	0.00307566	150	3.86023e-06	0.0496349	0.000330899	2.63228	10.2573	27	179	0.0220228	0.150838	region_1216,region_1818,region_1859,region_1889,region_203,region_2116,region_2280,region_3386,region_3611,region_3936,region_4031,region_4086,region_4169,region_4178,region_4244,region_5386,region_6430,region_6564,region_721,region_7349,region_7409,region_7981,region_8012,region_8522,region_8543,region_8713,region_8762,region_9023,region_9549,region_985	Bcl2a1d,C3ar1,Cd14,Cd86,Fcer1g,H2-M3,Irgm2,Lat2,Ly96,Lyn,Mef2c,Myo1g,Nckap1l,Nfatc2,Pik3ap1,Plcg2,Prkcb,Ptprc,Rftn1,Ticam2,Tlr2,Tlr4,Tlr6,Tlr9,Tnfrsf21,Trim12c,Unc93b1
GO Biological Process	GO:0045664	regulation of neuron differentiation	205	6.22714e-17	8.00686e-13	3.90578e-15	3.63868	16.7643	61	0.00171871	0.00625385	367	0.000317531	1	0.0111248	1.61584	34.038	55	594	0.0448613	0.0925926	region_1209,region_141,region_1467,region_158,region_1607,region_1685,region_17,region_1870,region_192,region_2048,region_2057,region_2188,region_2197,region_2242,region_269,region_286,region_293,region_3122,region_3137,region_3265,region_329,region_3327,region_3611,region_37,region_3806,region_3893,region_4031,region_4199,region_420,region_4281,region_4418,region_456,region_488,region_5099,regio…	App,Arhgap44,Asap1,Bex1,Bmp6,Cacna1a,Camk1,Chrnb2,Dab2ip,Disc1,Dlx2,Epha3,Epha4,Fes,Fez1,Fezf1,Flna,Fstl4,Gdf7,Golga4,Grin1,Hgf,Il1rap,Irx3,Isl1,Lrrk2,Lyn,Mef2c,Mgll,Ndnf,Neurog2,Nfatc4,Nkx6-1,Nr2e1,Nrp1,Ntrk1,Ntrk2,Pax6,Plxna4,Prox1,Ptprf,Rasal1,Ret,Rgma,Sema5a,Shh,Six3,Syt2,Tgif1,Tgif2,Tnik,Ust,Wnt7a,Zfp804a,Zhx2
GO Biological Process	GO:0032760	positive regulation of tumor necrosis factor production	206	7.29906e-17	9.38513e-13	4.55589e-15	13.1946	1.59156	21	0.000163171	0.00215296	104	4.67672e-07	0.00601332	5.78204e-05	4.12039	4.12582	17	72	0.0138662	0.236111	region_1216,region_1859,region_1907,region_203,region_306,region_310,region_3736,region_4086,region_4169,region_4178,region_4316,region_5099,region_5820,region_6430,region_655,region_721,region_7322,region_8476,region_9034,region_9318,region_9421	Card9,Ccl2,Ccl3,Cd14,Cyba,Fcer1g,H2-T23,Il12b,Isl1,Lgals9,Ly96,Nfatc4,Nod1,Tlr2,Tlr4,Tlr9,Zbtb20
GO Biological Process	GO:1903557	positive regulation of tumor necrosis factor superfamily cytokine production	207	9.54883e-17	1.22779e-12	5.93134e-15	13.0138	1.61367	21	0.000165437	0.00215296	109	5.77368e-07	0.0074238	6.81083e-05	4.06395	4.18313	17	73	0.0138662	0.232877	region_1216,region_1859,region_1907,region_203,region_306,region_310,region_3736,region_4086,region_4169,region_4178,region_4316,region_5099,region_5820,region_6430,region_655,region_721,region_7322,region_8476,region_9034,region_9318,region_9421	Card9,Ccl2,Ccl3,Cd14,Cyba,Fcer1g,H2-T23,Il12b,Isl1,Lgals9,Ly96,Nfatc4,Nod1,Tlr2,Tlr4,Tlr9,Zbtb20
GO Biological Process	GO:0051493	regulation of cytoskeleton organization	208	1.02783e-16	1.32158e-12	6.35377e-15	4.59402	10.013	46	0.00102655	0.00471601	863	0.00780442	1	0.11628	1.4991	26.0156	39	454	0.0318108	0.0859031	region_1060,region_1088,region_1198,region_1216,region_1279,region_1306,region_1314,region_158,region_1586,region_1608,region_1614,region_2308,region_269,region_3112,region_3159,region_3265,region_3370,region_3611,region_37,region_373,region_379,region_3893,region_4235,region_4335,region_4346,region_466,region_4754,region_5430,region_5939,region_6519,region_7171,region_721,region_7409,region_7450…	Add2,Arhgap18,Arhgap44,Arhgef19,Arpc1b,Eln,Epha3,Epha5,F11r,F2rl1,Fes,Flna,Gpm6b,Hck,Icam1,Jam3,Mef2c,Met,Myo1f,Nck2,Nckap1l,Nes,Nrp1,Pam,Plek,Prox1,Rapgef3,Rassf1,Ripor2,S1pr1,Sema5a,Sh3pxd2b,Snca,Stmn3,Tgfb2,Tlr2,Tmod1,Trpm2,Wnt4
GO Biological Process	GO:0046903	secretion	209	1.54193e-16	1.98261e-12	9.48619e-15	4.45174	10.5577	47	0.0010824	0.00481854	626	0.00236335	1	0.048543	1.56987	27.3909	43	478	0.0350734	0.0899582	region_1216,region_1285,region_1294,region_1391,region_150,region_1586,region_1608,region_1889,region_1907,region_2048,region_2057,region_2090,region_2315,region_2327,region_279,region_2927,region_3097,region_3327,region_3393,region_379,region_3817,region_4031,region_4178,region_4199,region_4418,region_457,region_4965,region_5914,region_593,region_6417,region_6430,region_6466,region_7187,region_7…	Abcb4,Adora3,Agtr1a,Aqp5,C1qtnf5,Cacna1a,Ccl3,Ccl5,Cd300a,Chrm1,Creb3l1,F2rl1,Fcer1g,Foxd1,Hck,Il1rap,Lat2,Lyn,Mc4r,Mertk,Myo1f,Myo1g,Nkd2,Ntrk2,P2rx7,Pla2g5,Plek,Rab15,Slc29a1,Stat5a,Stx11,Syt12,Syt2,Tac4,Tlr2,Tlr4,Tlr6,Tnfaip2,Tnfsf13b,Traf3ip2,Tyro3,Vip,Wnt7a
GO Biological Process	GO:0071902	positive regulation of protein serine/threonine kinase activity	210	1.82012e-16	2.34031e-12	1.11443e-14	5.83446	6.17023	36	0.000632585	0.00369079	266	7.5178e-05	0.966638	0.00363398	2.04941	16.1022	33	281	0.0269168	0.117438	region_1073,region_1294,region_181,region_1859,region_1889,region_2592,region_2687,region_2910,region_3386,region_4191,region_4331,region_456,region_5089,region_5277,region_5430,region_5735,region_6163,region_6430,region_6519,region_6633,region_7171,region_7289,region_7303,region_7364,region_743,region_748,region_7641,region_8337,region_8532,region_8778,region_9023,region_9222,region_9318,region_…	Camk1,Cd74,Cemip,Dab2ip,Epha4,Erbb2,Fzd8,Grm4,Hgf,Il1b,Irgm2,Lgals9,Lrrk2,Map3k20,Mdfic,Met,P2rx7,Pde5a,Pdgfb,Pik3cg,Prox1,Ptprc,Sash1,Snca,Tgfa,Tlr4,Tlr6,Tlr9,Tnf,Tnfrsf11a,Tnik,Tpd52l1,Trf
GO Biological Process	GO:0048667	cell morphogenesis involved in neuron differentiation	211	2.00082e-16	2.57265e-12	1.21927e-14	4.17852	11.9659	50	0.00122677	0.0051261	140	2.44703e-06	0.0314639	0.000224742	2.08856	21.546	45	376	0.0367047	0.119681	region_1073,region_1135,region_120,region_1209,region_1299,region_138,region_1467,region_150,region_1571,region_158,region_1607,region_1651,region_1685,region_1859,region_1901,region_2231,region_2268,region_2522,region_2743,region_293,region_3112,region_329,region_3327,region_3611,region_3739,region_415,region_4199,region_420,region_4418,region_466,region_488,region_5177,region_5327,region_549,re…	App,Artn,B3gnt2,Cacna1a,Chrnb2,Cnp,Ctnnd2,Cxcl12,Dcc,Dcdc2a,Dst,Efna2,Epha4,Epha5,Ephb1,Erbb2,Fez1,Fezf1,Fgfr3,Foxd1,Gdf7,Isl1,Lhx4,Lhx9,Map6,Mef2c,Neurog2,Nfib,Nptx1,Nr2e1,Nr4a2,Nrp1,Nrp2,Ntrk1,Pam,Pax6,Plxna4,Ptpro,Ripor2,Sema5a,Shh,Tgfb2,Tlr9,Tsku,Wnt7a
GO Biological Process	GO:0008219	cell death	212	2.04594e-16	2.63067e-12	1.24088e-14	3.14031	22.9277	72	0.00235059	0.00738159	1388	0.0301397	1	0.279205	1.26773	50.484	64	881	0.0522023	0.0726447	region_1135,region_1294,region_1374,region_1685,region_2138,region_2503,region_2547,region_2687,region_2697,region_2808,region_2824,region_2834,region_2927,region_3118,region_3151,region_3271,region_3327,region_3329,region_3611,region_375,region_4191,region_4244,region_4332,region_4418,region_443,region_477,region_488,region_4936,region_5089,region_5099,region_5177,region_5301,region_5430,region_…	1600014C10Rik,App,Bcl2a1a,Bcl2a1b,Bcl2a1d,Birc3,Cacna1a,Casp4,Casp7,Casp8,Chac1,Ctsc,Cxcl2,Dab2ip,Dcc,Ddx47,Dmpk,Egln3,Epha2,Erbb3,Eva1a,Faim2,Fgfr3,Foxl2,Gm29094,Hrk,Htatip2,Ifit2,Il1a,Il1b,Krt8,Lrp5,Lrrk2,Ltbr,Mef2c,Megf10,Myc,Nfatc4,Nfkb1,Nlrp1a,Nod1,Nsg1,Ntrk1,P2rx7,Perp,Pik3cg,Prkcb,Rassf6,Shh,Shisa5,Six3,Snca,Sncaip,Spi1,Tgfb2,Tgfbr2,Tmem117,Tnf,Tnfaip8,Tnfrsf11a,Tnfrsf21,Tnfrsf9,Tradd,Traf…
GO Biological Process	GO:0002699	positive regulation of immune effector process	213	2.25219e-16	2.89586e-12	1.35956e-14	7.23567	4.14613	30	0.000425069	0.00307566	151	4.08403e-06	0.0525125	0.000347765	2.57173	10.8876	28	190	0.0228385	0.147368	region_1216,region_1294,region_1818,region_1859,region_1900,region_3097,region_310,region_341,region_379,region_3893,region_4031,region_4178,region_4191,region_457,region_4607,region_470,region_5074,region_5269,region_5277,region_5820,region_5914,region_6018,region_6100,region_6430,region_6668,region_721,region_81,region_8476,region_9023,region_9157	Adora3,Ccl2,Cd1d1,Cd244,Cd300a,Cd37,Cd74,F2rl1,Fam49b,Fcer1g,Fes,Ffar3,H2-M3,H2-T23,Hk1,Hlx,Il12b,Il4ra,Lta,Lyn,P2rx7,Ptprc,Stat5a,Tlr2,Tlr4,Tlr9,Tnf,Zc3hav1
GO Biological Process	GO:0032940	secretion by cell	214	2.50596e-16	3.22216e-12	1.50568e-14	5.01815	8.17033	41	0.000837639	0.0042034	478	0.000730005	1	0.0196368	1.74511	21.2021	37	370	0.0301795	0.1	region_1216,region_1285,region_1294,region_1391,region_150,region_1586,region_1608,region_1889,region_1907,region_2048,region_2057,region_2090,region_279,region_2927,region_3327,region_3393,region_379,region_3817,region_4031,region_4178,region_4199,region_4418,region_457,region_5914,region_593,region_6417,region_6430,region_6466,region_7187,region_721,region_7300,region_7349,region_7467,region_78…	Adora3,Agtr1a,C1qtnf5,Cacna1a,Ccl3,Ccl5,Cd300a,Creb3l1,F2rl1,Fcer1g,Foxd1,Hck,Il1rap,Lat2,Lyn,Mc4r,Mertk,Myo1f,Myo1g,Nkd2,Ntrk2,P2rx7,Plek,Rab15,Stx11,Syt12,Syt2,Tac4,Tlr2,Tlr4,Tlr6,Tnfaip2,Tnfsf13b,Traf3ip2,Tyro3,Vip,Wnt7a
GO Biological Process	GO:0002460	adaptive immune response based on somatic recombination of immune receptors built from immunoglobulin superfamily domains	215	2.54133e-16	3.26764e-12	1.51983e-14	8.78048	2.96111	26	0.000303579	0.00266557	171	7.4885e-06	0.0962871	0.000563082	2.8651	7.67862	22	134	0.0179445	0.164179	region_1314,region_1380,region_1391,region_1614,region_1766,region_1889,region_3038,region_3084,region_3611,region_373,region_3796,region_4178,region_4548,region_5088,region_5275,region_5277,region_5530,region_5820,region_6205,region_6296,region_7349,region_7737,region_9107,region_9108,region_9157,region_9549	C1qa,C1qb,C1qc,C1rb,C1rl,C1s2,Cd55,Cd74,Ctsc,Fcer1g,H2-Ab1,Icam1,Il12b,Il4ra,Irf4,Mef2c,Myo1g,Rftn1,Serping1,Slc11a1,Stx11,Tlr6
GO Biological Process	GO:0071407	cellular response to organic cyclic compound	216	3.09434e-16	3.97871e-12	1.84199e-14	4.45604	10.3231	46	0.00105834	0.00471601	851	0.00746409	1	0.112777	1.49474	26.7605	40	467	0.0326264	0.0856531	region_1279,region_1294,region_1306,region_1314,region_1374,region_1614,region_1637,region_1685,region_1859,region_1907,region_2603,region_2687,region_287,region_293,region_306,region_3097,region_329,region_341,region_3508,region_3611,region_373,region_375,region_4191,region_4265,region_4343,region_4812,region_488,region_507,region_5089,region_5099,region_5615,region_6417,region_6952,region_6978,…	Abcb4,Adcy5,Agtr1a,Aif1,App,Casp7,Ccl12,Ccl2,Ccl3,Ccl5,Cyba,Eif4ebp1,Epha5,Gjb2,Icam1,Il1b,Isl1,Lrrk2,Mb21d1,Mef2c,Msn,Nfatc4,Nfkb1,Nr2e1,Nr2f1,Nr4a2,Ntrk1,P2rx7,P2ry12,P2ry13,P2ry6,Pdgfb,Pik3cg,Rapgef3,Stat5a,Thrb,Tlr9,Tnf,Trpm2,Zc3hav1
GO Biological Process	GO:0018108	peptidyl-tyrosine phosphorylation	217	3.78389e-16	4.86533e-12	2.24209e-14	8.17702	3.30194	27	0.000338521	0.00276809	79	1.2189e-07	0.00156726	1.98388e-05	3.12039	8.65277	27	151	0.0220228	0.178808	region_1073,region_1135,region_1685,region_2057,region_2361,region_2716,region_279,region_3097,region_3265,region_3393,region_3523,region_3554,region_3893,region_4031,region_4060,region_415,region_5249,region_5735,region_6519,region_6812,region_6838,region_7300,region_7342,region_823,region_8532,region_9222,region_9370	Agtr1a,Epha10,Epha2,Epha3,Epha4,Epha5,Ephb1,Erbb2,F2r,Fes,Fgfr3,Grap,Hck,Insrr,Kdr,Lyn,Mertk,Met,Ntrk1,Ntrk2,Osm,Pdgfb,Pdgfra,Ret,Stat5a,Ttn,Tyro3
GO Biological Process	GO:0006366	transcription from RNA polymerase II promoter	218	4.17277e-16	5.36535e-12	2.46117e-14	3.83928	14.0651	54	0.00144199	0.00553619	1591	0.0473626	1	0.382771	1.30051	33.0639	43	577	0.0350734	0.0745234	region_1035,region_1374,region_1375,region_150,region_166,region_1870,region_1901,region_20,region_210,region_2242,region_2823,region_293,region_298,region_3097,region_313,region_3151,region_329,region_3342,region_3469,region_3611,region_3640,region_375,region_3817,region_3918,region_4386,region_4677,region_4936,region_5149,region_5436,region_5564,region_6179,region_6190,region_6208,region_6219,r…	Barhl1,Creb3l1,Creb5,Dlx2,Ebf3,Elf4,Fli1,Foxd1,Foxl2,Gata4,Gata5,Glis3,Hivep2,Hoxa5,Hoxc10,Hoxd10,Hoxd13,Ikzf3,Irf4,Isl1,Maf,Mef2c,Mesp1,Myc,Nfatc1,Nfatc2,Nfia,Nfib,Nfkb1,Nkx6-1,Nr2e1,Nr4a2,Onecut3,Otx1,Pax5,Pax6,Sall3,Six3,Six4,Spi1,Stat5a,Tcf15,Tfap2e
GO Biological Process	GO:0050803	regulation of synapse structure or activity	219	4.27369e-16	5.49511e-12	2.50918e-14	8.58541	3.02839	26	0.000310477	0.00266557	117	8.87755e-07	0.0114147	9.7562e-05	3.05712	7.85053	24	137	0.0195759	0.175182	region_1216,region_1375,region_1467,region_1685,region_2048,region_2057,region_3137,region_3271,region_3611,region_415,region_4199,region_4274,region_4404,region_488,region_5099,region_5430,region_5620,region_5735,region_6402,region_6633,region_6801,region_7171,region_721,region_8422,region_8778,region_898	Amigo2,App,Camk1,Chrnb2,Clstn2,Dab2ip,Disc1,Dmpk,Epha4,Ephb1,Grin1,Il10ra,Il1rap,Lrrc4,Mef2c,Ncan,Nfatc4,Ntrk1,Ntrk2,Six4,Snca,Tlr2,Tpbg,Wnt7a
GO Biological Process	GO:0060341	regulation of cellular localization	220	4.29744e-16	5.52565e-12	2.51166e-14	3.12307	22.734	71	0.00233074	0.00727907	866	0.00803928	1	0.119364	1.34703	49.7391	67	868	0.0546493	0.0771889	region_1022,region_1069,region_1073,region_1147,region_1216,region_1294,region_1508,region_1576,region_1859,region_1932,region_214,region_2190,region_2687,region_2716,region_2783,region_3008,region_306,region_32,region_3296,region_330,region_3327,region_3532,region_3611,region_37,region_3893,region_4031,region_414,region_4178,region_4191,region_4343,region_4346,region_4418,region_457,region_4773,…	Adcy5,Adora2a,Adora3,Ano1,App,Arhgef16,Bmp6,Cabp1,Cacna1a,Camk1,Ccl2,Cd300a,Cemip,Chrm1,Cxcl10,Cyba,Dab2ip,Dclk2,Dtx3l,Eda,Epha2,Epha5,Erbb2,F2r,Fcer1g,Fes,Flna,Fzd1,Gpm6b,Gpr27,Hps4,Hrc,Ica1,Il1b,Il4ra,Lmna,Lrp5,Lrrc15,Lrrk2,Lyn,Mdfic,Mef2c,Msn,Nat8l,Nkd2,P2rx7,Parp9,Pkia,Prr5l,Rapgef3,Rbpms,Reep1,Sema5a,Shh,Snca,Sncaip,Sri,Sulf2,Syt12,Tcaf1,Tgfb2,Tlr2,Tlr4,Tlr9,Tmbim1,Tnf,Trpm4
GO Biological Process	GO:0071356	cellular response to tumor necrosis factor	221	5.48608e-16	7.054e-12	3.19186e-14	8.05046	3.35385	27	0.000343843	0.00276809	203	1.86466e-05	0.239758	0.00118107	2.64062	8.71007	23	152	0.0187602	0.151316	region_1314,region_1614,region_1907,region_2138,region_2217,region_2603,region_306,region_373,region_3784,region_3870,region_4191,region_4382,region_594,region_6160,region_6417,region_6916,region_7165,region_7220,region_782,region_8476,region_8583,region_8770,region_8778,region_8824,region_9416,region_9422,region_985	Adamts13,Adamts7,Birc3,Ccl12,Ccl2,Ccl3,Ccl4,Ccl5,Cldn1,Cyba,Dab2ip,Icam1,Krt8,Lims1,Ltbr,Npnt,Ocln,Ocstamp,Tank,Tnf,Tnfrsf11a,Tnfrsf21,Tnfrsf9
GO Biological Process	GO:0018212	peptidyl-tyrosine modification	222	6.07475e-16	7.81091e-12	3.51843e-14	8.01603	3.36825	27	0.00034532	0.00276809	90	1.84898e-07	0.00237742	2.64158e-05	3.0596	8.82468	27	154	0.0220228	0.175325	region_1073,region_1135,region_1685,region_2057,region_2361,region_2716,region_279,region_3097,region_3265,region_3393,region_3523,region_3554,region_3893,region_4031,region_4060,region_415,region_5249,region_5735,region_6519,region_6812,region_6838,region_7300,region_7342,region_823,region_8532,region_9222,region_9370	Agtr1a,Epha10,Epha2,Epha3,Epha4,Epha5,Ephb1,Erbb2,F2r,Fes,Fgfr3,Grap,Hck,Insrr,Kdr,Lyn,Mertk,Met,Ntrk1,Ntrk2,Osm,Pdgfb,Pdgfra,Ret,Stat5a,Ttn,Tyro3
GO Biological Process	GO:0042742	defense response to bacterium	223	6.51852e-16	8.38151e-12	3.75852e-14	5.96461	5.70029	34	0.000584406	0.00348575	441	0.000572782	1	0.0167003	1.92426	15.0707	29	263	0.0236542	0.110266	region_11,region_1216,region_1294,region_1586,region_1818,region_1859,region_1889,region_2780,region_310,region_3329,region_3386,region_3736,region_4178,region_4191,region_4316,region_4641,region_5674,region_5820,region_5922,region_6381,region_6430,region_655,region_6668,region_67,region_721,region_7342,region_7467,region_768,region_8717,region_9004,region_9034,region_9108,region_9370,region_959	Card9,Defb29,Epha2,Fcer1g,Gbp3,H2-M3,H2-T23,Hck,Hist1h2bf,Hist1h2bn,Hist1h2br,Il12b,Irgm2,Lalba,Lta,Lypd8,Myo1f,Ncf1,Nlrp1a,Nod1,P2rx7,Slamf8,Slc11a1,Tlr2,Tlr4,Tlr6,Tlr9,Tnf,Tnfaip8
GO Biological Process	GO:0042063	gliogenesis	224	7.64148e-16	9.82541e-12	4.38635e-14	4.85125	8.45143	41	0.000866458	0.0042034	45	9.19505e-09	0.00011823	2.62733e-06	2.88183	12.4921	36	218	0.0293638	0.165138	region_1073,region_1135,region_1216,region_138,region_1901,region_1907,region_1985,region_2057,region_2242,region_2603,region_2743,region_293,region_329,region_3296,region_39,region_4031,region_4265,region_443,region_4545,region_4628,region_4740,region_477,region_488,region_5177,region_5191,region_5735,region_5939,region_6048,region_6155,region_6430,region_6625,region_721,region_7255,region_7511,…	Adam22,Adora2a,App,Ccl12,Ccl2,Ccl3,Cd9,Cnp,Dab2ip,Disc1,Dner,Emx1,Epha4,Erbb2,Erbb3,Fgf5,Fgfr3,Lamc3,Lyn,Nfib,Nkx6-1,Nr2e1,Ntrk2,P2ry12,Pax6,Pdgfb,Plp1,Plpp3,Pou3f1,Ptprj,Shh,Tal1,Tgfb2,Tlr2,Tlr4,Tspan2
GO Biological Process	GO:0002687	positive regulation of leukocyte migration	225	7.6701e-16	9.86221e-12	4.3832e-14	8.86083	2.82141	25	0.000289256	0.00256305	148	3.4674e-06	0.0445838	0.000301242	2.9994	7.3348	22	128	0.0179445	0.171875	region_1216,region_1278,region_1314,region_1614,region_1907,region_2231,region_2280,region_2603,region_2824,region_3112,region_373,region_379,region_4545,region_457,region_4773,region_488,region_5277,region_6417,region_6916,region_6978,region_721,region_7409,region_7707,region_8476,region_9318	Adora3,Aif1,App,C3ar1,Ccl12,Ccl2,Ccl3,Ccl4,Ccl5,Cd74,Cxcl10,Cxcl12,Cxcl2,Dock8,F2rl1,Icam1,Il1a,Lgals9,Nckap1l,Ptprj,Ripor2,Tlr2
GO Biological Process	GO:0030900	forebrain development	226	8.52828e-16	1.09657e-11	4.85206e-14	3.95522	12.8944	51	0.00132196	0.00522862	201	1.75183e-05	0.225251	0.00112065	1.92045	23.9527	46	418	0.0375204	0.110048	region_1101,region_1135,region_1209,region_138,region_1467,region_1571,region_158,region_1607,region_1637,region_1870,region_1901,region_1932,region_20,region_2057,region_2268,region_2609,region_2743,region_293,region_3137,region_329,region_3393,region_39,region_4199,region_420,region_488,region_5115,region_5177,region_5191,region_5209,region_549,region_5534,region_5852,region_6048,region_6294,re…	Aldh1a2,App,Chrnb2,Cnp,Dab2ip,Dclk2,Disc1,Dlx2,Efna2,Emx1,Emx2,Epha5,Fat4,Fez1,Fezf1,Fgfr3,Gdf7,Grin1,Hhex,Ikzf1,Isl1,Lrrk2,Neurog2,Nfib,Nr2e1,Nr2f1,Nr4a2,Nrp1,Nrp2,Ntrk2,Otx1,Pax5,Pax6,Plxna4,Pou3f1,Prox1,Sall3,Sema5a,Shh,Six3,Tsku,Tyro3,Wnt1,Wnt4,Wnt7a,Zic5
GO Biological Process	GO:0016192	vesicle-mediated transport	227	8.61482e-16	1.10769e-11	4.87971e-14	2.96936	25.258	75	0.0025895	0.00768915	1270	0.0261054	1	0.264302	1.26045	56.329	71	983	0.0579119	0.0722279	region_1075,region_1294,region_1391,region_1458,region_1484,region_1586,region_1608,region_1679,region_17,region_1793,region_1852,region_1907,region_203,region_212,region_224,region_248,region_269,region_2712,region_2733,region_279,region_2941,region_3049,region_3167,region_3266,region_3327,region_3393,region_3644,region_37,region_3778,region_3809,region_4031,region_4178,region_4299,region_4418,r…	Ackr3,Adora3,Aif1,Ap1g2,App,Arhgap25,Arhgap44,Arr3,Cacna1a,Cacng2,Ccl3,Ccl5,Cd14,Cd300a,Cd302,Cd9,Cltb,Cxcl16,Dysf,Ehd2,Ergic2,Fcer1g,Flna,Fnbp1l,Ghr,Golga4,Grk3,Hck,Hhipl1,Lat2,Ldlr,Lgals3bp,Loxl3,Lrp5,Lrrk2,Lyn,Macf1,Mapk8ip1,Megf10,Mertk,Mppe1,Myo1e,Myo1f,Myo1g,Ncf2,Ncf4,Nkd2,Nsg1,Ophn1,P2rx7,Pear1,Pik3cg,Plek,Rab15,Rab20,Rab32,Rab9b,Ramp1,Ramp2,Shh,Slc11a1,Snca,Snx7,Stx11,Syt12,Syt2,Tac4,Tbc1…
GO Biological Process	GO:2000106	regulation of leukocyte apoptotic process	228	1.15845e-15	1.48954e-11	6.53305e-14	10.5915	2.07714	22	0.000212953	0.00225549	163	5.5456e-06	0.0713054	0.000437456	3.34169	5.38649	18	94	0.0146819	0.191489	region_1278,region_1294,region_1512,region_2231,region_2366,region_2537,region_2542,region_279,region_2808,region_3097,region_3611,region_4031,region_4178,region_4936,region_5240,region_5277,region_5939,region_6190,region_6417,region_6975,region_7299,region_8199	Bcl2a1a,Casp8,Ccl5,Cd74,Cxcl12,Dock8,Fcer1g,Itpkb,Lyn,Mef2c,Mertk,Myc,P2rx7,Pik3cd,Stat5a,Tgfb2,Tsc22d3,Tsc22d4
GO Biological Process	GO:0050707	regulation of cytokine secretion	229	1.1674e-15	1.50104e-11	6.55478e-14	7.42457	3.77126	28	0.000386638	0.00287062	195	1.51382e-05	0.194647	0.000998189	2.55132	9.79883	25	171	0.0203915	0.146199	region_1216,region_1294,region_1859,region_1889,region_1900,region_1907,region_203,region_2048,region_2116,region_2687,region_2716,region_2824,region_379,region_3936,region_4031,region_4191,region_5582,region_6430,region_721,region_7300,region_7906,region_81,region_8583,region_9004,region_9157,region_9318,region_9323,region_985	Agtr1a,Casp4,Ccl3,Cd14,Cd244,Cd300c2,F2r,F2rl1,Hk1,Il1a,Il1b,Il1rap,Il4ra,Lgals9,Lyn,Nlrp1a,P2rx7,Tlr2,Tlr4,Tlr6,Tlr9,Tnf,Tnfrsf21,Tnfrsf9,Unc93b1
GO Biological Process	GO:0002064	epithelial cell development	230	1.17048e-15	1.505e-11	6.54347e-14	6.51821	4.75591	31	0.000487585	0.00317818	294	0.000116458	1	0.00509325	2.18138	12.3775	27	216	0.0220228	0.125	region_1060,region_1135,region_1154,region_1314,region_1614,region_1685,region_2242,region_2397,region_3112,region_3116,region_34,region_373,region_379,region_4102,region_4199,region_6159,region_6519,region_6952,region_7255,region_7342,region_753,region_773,region_7990,region_8337,region_8532,region_8824,region_8976,region_9190,region_9222,region_942,region_9461	Ampd2,Bfsp1,Bmp6,Cldn1,Cnmd,Dact2,Epha2,F11r,F2rl1,Fgfr3,Hoxa5,Icam1,Kdf1,Met,Msn,Myo1e,Nkx6-1,Ntrk1,Pax6,Pdgfb,Prox1,Rap2c,Rapgef3,Ripor2,Six3,Tmod1,Wnt7a
GO Biological Process	GO:0000122	negative regulation of transcription from RNA polymerase II promoter	231	1.20232e-15	1.54594e-11	6.69237e-14	3.11714	22.1357	69	0.0022694	0.00707402	1399	0.0311942	1	0.286701	1.27334	47.9054	61	836	0.0497553	0.0729665	region_1043,region_1104,region_1135,region_1374,region_141,region_1414,region_1637,region_1870,region_1901,region_192,region_2010,region_206,region_210,region_2242,region_2615,region_2823,region_2910,region_2920,region_293,region_313,region_3151,region_329,region_330,region_3359,region_3611,region_3640,region_375,region_3918,region_4045,region_4191,region_4235,region_4812,region_4872,region_4936,…	Bmp6,Cbfa2t3,Crym,Dab2ip,Dlx2,Ets2,Fezf1,Fgfr3,Foxe1,Foxl2,Fzd8,Glis3,Hhex,Hist1h3d,Hist2h3b,Hmx1,Hoxd9,Ifi211,Ikzf1,Isl1,Lrrfip1,Maf,Mbd3l1,Mef2c,Myc,Nck2,Nfatc1,Nfatc2,Nfatc4,Nfia,Nfib,Nfkb1,Nkx6-1,Nr2e1,Nr2f1,Nr4a2,Ovol1,Parp9,Pax5,Pax6,Pdgfb,Pkia,Prdm5,Prox1,Rcor2,Shh,Spi1,Tagln3,Tal1,Tgif1,Tgif2,Thrb,Tnf,Tsc22d3,Tshz2,Tshz3,Zbtb20,Zbtb42,Zfp57,Zfp608,Zhx2
GO Biological Process	GO:0051480	regulation of cytosolic calcium ion concentration	232	1.2597e-15	1.61972e-11	6.98155e-14	6.25521	5.11573	32	0.000524476	0.00328071	270	7.73767e-05	0.994909	0.00368485	2.16274	13.4089	29	234	0.0236542	0.123932	region_1013,region_1279,region_1294,region_1306,region_133,region_1345,region_1907,region_214,region_2280,region_2361,region_2716,region_3082,region_3137,region_3327,region_379,region_4343,region_4418,region_5089,region_5386,region_5392,region_6089,region_6432,region_6663,region_6864,region_7300,region_7359,region_7693,region_7707,region_7841,region_86,region_9023,region_9256	Adcy5,Adra1d,Agtr1a,C3ar1,Cacna1a,Calb2,Catsper4,Ccl3,Cxcl2,F2r,F2rl1,Gna15,Gpr6,Grin1,Hcrtr1,Hrc,Itpr3,P2rx7,Pdgfra,Pik3cg,Plcg2,Pth1r,Ptprc,Pvalb,S1pr1,Tac4,Tmem178,Trpm2,Trpm4
GO Biological Process	GO:0050867	positive regulation of cell activation	233	1.30144e-15	1.67339e-11	7.18193e-14	4.45969	9.86616	44	0.0010115	0.00451097	66	4.24168e-08	0.000545395	8.26356e-06	2.52825	16.2168	41	283	0.0334421	0.144876	region_1278,region_1285,region_1467,region_1608,region_1818,region_1859,region_1889,region_2090,region_2195,region_2537,region_2687,region_3097,region_310,region_3611,region_379,region_4178,region_4235,region_4545,region_457,region_470,region_488,region_5067,region_5177,region_5209,region_5269,region_5277,region_5590,region_5820,region_6018,region_6100,region_6110,region_6417,region_6430,region_6…	Adora3,Aif1,App,Ccl2,Ccl5,Cd1d1,Cd244,Cd74,Cd83,Cd86,Chrnb2,Dock8,F2rl1,Fam49b,Fcer1g,H2-M3,H2-T23,Hlx,Igfbp2,Ikzf1,Il12b,Il1b,Il1rl2,Il4ra,Itpkb,Lgals9,Mef2c,Nck2,Nckap1l,Nfatc2,Plek,Ptprc,Ptprj,Shh,Stat5a,Tgfbr2,Tlr4,Tlr6,Tlr9,Tnfsf13b,Tnfsf9
GO Biological Process	GO:0050807	regulation of synapse organization	234	1.36898e-15	1.76024e-11	7.52239e-14	8.6333	2.89576	25	0.00029688	0.00256305	126	1.43179e-06	0.0184099	0.000146111	3.06393	7.50671	23	131	0.0187602	0.175572	region_1216,region_1375,region_1467,region_1685,region_2048,region_2057,region_3137,region_3271,region_3611,region_415,region_4199,region_4274,region_4404,region_5099,region_5430,region_5620,region_5735,region_6402,region_6633,region_6801,region_7171,region_721,region_8422,region_8778,region_898	Amigo2,Camk1,Chrnb2,Clstn2,Dab2ip,Disc1,Dmpk,Epha4,Ephb1,Grin1,Il10ra,Il1rap,Lrrc4,Mef2c,Ncan,Nfatc4,Ntrk1,Ntrk2,Six4,Snca,Tlr2,Tpbg,Wnt7a
GO Biological Process	GO:1901652	response to peptide	235	1.54588e-15	1.9877e-11	8.45829e-14	4.74795	8.63531	41	0.000885309	0.0042034	960	0.0104241	1	0.139617	1.51748	22.4055	34	391	0.0277325	0.0869565	region_1314,region_133,region_1374,region_1614,region_1793,region_1889,region_2242,region_287,region_306,region_3097,region_3266,region_3327,region_373,region_3733,region_3736,region_375,region_4031,region_4316,region_4418,region_488,region_5002,region_5115,region_5582,region_5585,region_5735,region_5852,region_6089,region_6430,region_655,region_6853,region_7187,region_7300,region_739,region_8187…	Abcb4,Agtr1a,App,Bglap2,Cacna1a,Card9,Casp4,Ccl2,Cyba,Eif4ebp1,Epha4,Gal,Ghr,Gjb2,Hcrtr1,Hhex,Hsd11b2,Icam1,Inhbb,Irf5,Lrp5,Lyn,Mc4r,Nfkb1,Nkx6-1,Nlrp1a,Nod1,Nr4a2,Pde3b,Stat5a,Tbc1d4,Tlr4,Tlr6,Wnt1
GO Biological Process	GO:0071222	cellular response to lipopolysaccharide	236	1.66614e-15	2.14232e-11	9.07764e-14	7.68201	3.51471	27	0.000360335	0.00276809	235	3.88276e-05	0.499245	0.00212445	2.52437	9.11119	23	159	0.0187602	0.144654	region_1314,region_1374,region_1614,region_1679,region_1859,region_1907,region_203,region_2603,region_2687,region_3386,region_3611,region_373,region_375,region_4031,region_4086,region_4169,region_4191,region_4773,region_5820,region_6417,region_6430,region_7165,region_7707,region_8476,region_8522,region_8762,region_8778	Adamts13,Ccl12,Ccl2,Ccl3,Ccl5,Cd14,Cd86,Cxcl10,Cxcl16,Cxcl2,Dab2ip,Icam1,Il12b,Il1b,Irgm2,Ly96,Lyn,Mef2c,Nfkb1,Ticam2,Tlr4,Tlr9,Tnf
GO Biological Process	GO:0030029	actin filament-based process	237	1.87535e-15	2.41133e-11	1.01744e-13	4.32217	10.4114	45	0.0010674	0.00461349	696	0.00333422	1	0.0615969	1.54957	27.1044	42	473	0.0342577	0.0887949	region_1046,region_1060,region_1105,region_1123,region_1375,region_148,region_158,region_1608,region_1653,region_1685,region_2138,region_2361,region_2712,region_3167,region_3400,region_3554,region_37,region_4191,region_4235,region_4260,region_4335,region_4484,region_456,region_4890,region_5229,region_550,region_5582,region_6016,region_6079,region_652,region_6697,region_6978,region_7364,region_740…	Add2,Agap2,Aif1,Antxr1,Arhgap25,Arpc1b,Casp4,Cnn1,Diaph2,Ehd2,Eln,F11r,Fat1,Flna,Fmnl1,Fry,Gas2l3,Inf2,Insrr,Kcnj8,Kcnn2,Krt8,Mybpc2,Nck2,Nckap1l,Nrp1,Ophn1,Parvg,Pdgfb,Pdgfra,Pdlim4,Plek,Prox1,S1pr1,Scn4b,Six4,Tmod1,Tnf,Tnik,Trf,Ttn,Xirp1
GO Biological Process	GO:0050830	defense response to Gram-positive bacterium	238	1.99566e-15	2.56602e-11	1.07816e-13	10.3073	2.13441	22	0.000218824	0.00225549	225	3.35731e-05	0.431683	0.00191859	3.05843	5.5584	17	97	0.0138662	0.175258	region_11,region_1216,region_1294,region_1586,region_310,region_3329,region_3736,region_4191,region_4316,region_5674,region_5922,region_655,region_6668,region_67,region_721,region_7342,region_7467,region_768,region_8717,region_9034,region_9370,region_959	Card9,Epha2,Gbp3,H2-T23,Hck,Hist1h2bf,Hist1h2bn,Hist1h2br,Lalba,Lta,Myo1f,Ncf1,Nod1,P2rx7,Tlr2,Tnf,Tnfaip8
GO Biological Process	GO:0031400	negative regulation of protein modification process	239	2.36812e-15	3.04493e-11	1.27403e-13	3.98306	12.3021	49	0.00126124	0.00502358	1195	0.0202033	1	0.217384	1.37607	31.9751	44	558	0.0358891	0.078853	region_1022,region_1046,region_1180,region_1276,region_1294,region_1433,region_1464,region_1576,region_1985,region_2467,region_2687,region_2916,region_3177,region_3296,region_330,region_3778,region_379,region_3911,region_4031,region_414,region_4191,region_4235,region_4404,region_4545,region_4698,region_5115,region_5430,region_5852,region_5914,region_5972,region_611,region_6294,region_6430,region_…	Adora2a,Bex4,Cd300a,Dab2ip,Dtx3l,Dusp16,Dusp2,F2rl1,Fry,Gprc5a,Hgf,Hhex,Il1b,Lrp5,Lrrc15,Lrrc4,Lrrk1,Lrrk2,Lyn,Mapk8ip1,Nck2,Nckap1l,Ndrg2,P2rx7,Pax5,Pax6,Pkia,Plpp3,Prkag2,Prkar2b,Prr5l,Ptprc,Ptprj,Ptprr,Rassf2,Snca,Spi1,Spopl,Spred2,Timp3,Tlr4,Tnf,Trim21,Wnt1
GO Biological Process	GO:0030036	actin cytoskeleton organization	240	2.40859e-15	3.09696e-11	1.2904e-13	4.57619	9.17794	42	0.000940941	0.00430593	592	0.0018617	1	0.0404355	1.63211	23.8954	39	417	0.0318108	0.0935252	region_1046,region_1060,region_1105,region_1123,region_1375,region_148,region_158,region_1608,region_1685,region_2138,region_2361,region_2712,region_3167,region_3400,region_3554,region_37,region_4191,region_4235,region_4260,region_4335,region_4484,region_456,region_4890,region_5229,region_550,region_5582,region_6016,region_652,region_6978,region_7364,region_7409,region_7431,region_7990,region_809…	Add2,Agap2,Aif1,Antxr1,Arhgap25,Arpc1b,Casp4,Cnn1,Diaph2,Ehd2,Eln,F11r,Fat1,Flna,Fmnl1,Fry,Gas2l3,Inf2,Insrr,Krt8,Mybpc2,Nck2,Nckap1l,Nrp1,Ophn1,Parvg,Pdgfb,Pdgfra,Pdlim4,Plek,Prox1,S1pr1,Six4,Tmod1,Tnf,Tnik,Trf,Ttn,Xirp1
GO Biological Process	GO:0060562	epithelial tube morphogenesis	241	2.49726e-15	3.21097e-11	1.33235e-13	3.97736	12.3197	49	0.00126304	0.00502358	166	6.07984e-06	0.0781746	0.000470931	2.07633	20.228	42	353	0.0342577	0.11898	region_1035,region_1101,region_1397,region_150,region_158,region_192,region_210,region_2231,region_236,region_286,region_313,region_3342,region_3469,region_3611,region_451,region_4677,region_4936,region_5099,region_5115,region_5177,region_528,region_5534,region_5735,region_5852,region_5879,region_5939,region_5964,region_6054,region_6110,region_6190,region_6309,region_6519,region_6812,region_6838,…	Aldh1a2,Casp8,Cxcl12,Epha2,Epha4,Fat4,Foxd1,Fzd1,Fzd2,Gata4,Gdf7,Hhex,Hoxa5,Hoxd11,Irx3,Kdr,Kif26b,Lama1,Lgr5,Lrp5,Mef2c,Mesp1,Met,Myc,Nfatc1,Nfatc4,Notch4,Npnt,Nrp1,Ret,Rgma,Sema5a,Shh,Sostdc1,Spint1,Tgfb2,Tgfbr2,Tgif1,Wnt1,Wnt4,Yap1,Zic5
GO Biological Process	GO:0043524	negative regulation of neuron apoptotic process	242	2.52284e-15	3.24387e-11	1.34044e-13	7.9473	3.27155	26	0.000335406	0.00266557	186	1.19585e-05	0.153762	0.000826676	2.71199	8.48086	23	148	0.0187602	0.155405	region_1375,region_158,region_1685,region_1765,region_2057,region_2603,region_2716,region_3137,region_3159,region_3296,region_3327,region_3393,region_3611,region_3806,region_4418,region_443,region_477,region_5430,region_7171,region_7838,region_8187,region_8211,region_8476,region_8683,region_8774,region_9421	Adora2a,Agap2,Barhl1,Cacna1a,Ccl12,Ccl2,Cntfr,En2,Erbb3,F2r,Faim2,Grin1,Isl1,Mef2c,Ndnf,Nes,Nr4a2,Nrp1,Ntrk1,Ntrk2,Six4,Snca,Tyro3
GO Biological Process	GO:1901215	negative regulation of neuron death	243	2.58439e-15	3.32301e-11	1.3675e-13	6.86867	4.22207	29	0.000432855	0.00297314	232	3.67397e-05	0.472398	0.0020362	2.37554	10.9449	26	191	0.0212072	0.136126	region_1375,region_158,region_1685,region_1765,region_2057,region_2603,region_2716,region_3137,region_3159,region_3296,region_3327,region_3393,region_3611,region_3806,region_4418,region_443,region_477,region_5115,region_5430,region_5879,region_7171,region_7303,region_7838,region_8187,region_8211,region_8476,region_8683,region_8774,region_9421	Adora2a,Agap2,Barhl1,Cacna1a,Ccl12,Ccl2,Cntfr,En2,Erbb3,F2r,Faim2,Fzd1,Grin1,Isl1,Lrrk2,Mef2c,Ndnf,Nes,Nr4a2,Nrp1,Ntrk1,Ntrk2,Six4,Snca,Tyro3,Wnt1
GO Biological Process	GO:0010975	regulation of neuron projection development	244	2.68526e-15	3.4527e-11	1.41504e-13	4.46087	9.63937	43	0.000988248	0.00440845	733	0.00419299	1	0.0735518	1.55742	25.0415	39	437	0.0318108	0.0892449	region_1209,region_1467,region_158,region_1607,region_1685,region_17,region_2048,region_2057,region_2188,region_2242,region_269,region_286,region_293,region_3122,region_3137,region_3265,region_329,region_3327,region_3611,region_37,region_3806,region_3893,region_4031,region_4199,region_4281,region_4418,region_456,region_5099,region_549,region_5497,region_5735,region_6633,region_6812,region_7274,re…	Arhgap44,Asap1,Cacna1a,Camk1,Chrnb2,Dab2ip,Disc1,Epha3,Epha4,Fes,Fez1,Flna,Fstl4,Golga4,Grin1,Hgf,Il1rap,Lrrk2,Lyn,Mef2c,Mgll,Ndnf,Nfatc4,Nkx6-1,Nr2e1,Nrp1,Ntrk1,Ntrk2,Plxna4,Ptprf,Rasal1,Ret,Rgma,Sema5a,Syt2,Tnik,Ust,Wnt7a,Zfp804a
GO Biological Process	GO:0043523	regulation of neuron apoptotic process	245	3.25014e-15	4.17903e-11	1.70573e-13	6.52459	4.59799	30	0.000471395	0.00307566	259	6.62298e-05	0.851583	0.00328796	2.25444	11.9764	27	209	0.0220228	0.129187	region_1135,region_1375,region_158,region_1685,region_1765,region_1907,region_2057,region_2547,region_2603,region_2716,region_3137,region_3159,region_3296,region_3327,region_3393,region_3611,region_3806,region_4418,region_443,region_477,region_5430,region_5939,region_7171,region_7838,region_8187,region_8211,region_8476,region_8683,region_8774,region_9421	Adora2a,Agap2,Barhl1,Cacna1a,Ccl12,Ccl2,Ccl3,Cntfr,Egln3,En2,Erbb3,F2r,Faim2,Fgfr3,Grin1,Isl1,Mef2c,Ndnf,Nes,Nr4a2,Nrp1,Ntrk1,Ntrk2,Six4,Snca,Tgfb2,Tyro3
GO Biological Process	GO:0006816	calcium ion transport	246	3.38392e-15	4.35104e-11	1.76871e-13	6.26068	4.95153	31	0.000507642	0.00317818	419	0.000498686	1	0.0153034	2.02557	12.8359	26	224	0.0212072	0.116071	region_1075,region_1279,region_1294,region_1306,region_1467,region_1907,region_210,region_214,region_2716,region_2783,region_3014,region_313,region_3137,region_3327,region_3371,region_3572,region_4265,region_4418,region_5262,region_5386,region_5392,region_5961,region_6108,region_6309,region_6417,region_6663,region_6864,region_7981,region_9023,region_9050,region_98	Cacna1a,Cacng2,Cacng3,Catsper4,Ccl3,Ccl5,Chrnb2,Cracr2b,F2r,Grin1,Grm7,Itpr3,Nfatc1,Orai3,P2rx7,P2ry12,Plcg2,Prkcb,Ptprc,Ramp1,Ramp2,Slc24a4,Sri,Trpm2,Trpm4,Trpm8
GO Biological Process	GO:0045936	negative regulation of phosphate metabolic process	247	6.33296e-15	8.14292e-11	3.29673e-13	3.8783	12.6344	49	0.0012953	0.00502358	1196	0.0202313	1	0.217503	1.3705	32.8347	45	573	0.0367047	0.078534	region_1022,region_1180,region_1294,region_1433,region_1464,region_1576,region_1608,region_1985,region_2467,region_2687,region_2916,region_3177,region_3296,region_3778,region_379,region_4031,region_4191,region_4235,region_4404,region_4545,region_4698,region_5430,region_5852,region_5914,region_5939,region_594,region_5972,region_6108,region_611,region_6430,region_6827,region_6835,region_6853,region…	Adora2a,Birc3,Cbfa2t3,Cd300a,Dab2ip,Dusp16,Dusp2,F2rl1,Gprc5a,Grm7,Hgf,Hhex,Hpn,Il1b,Lrp5,Lrrc15,Lrrc4,Lrrk1,Lrrk2,Lyn,Mapk8ip1,Nck2,Nckap1l,Ndrg2,P2rx7,P2ry13,Pax6,Pdgfb,Pkia,Plek,Plpp3,Ppp1r36,Prkag2,Prkar2b,Prr5l,Ptprc,Ptprj,Ptprr,Rassf2,Snca,Spred2,Tgfb2,Timp3,Tlr4,Tnf
GO Biological Process	GO:0008015	blood circulation	248	6.70911e-15	8.62658e-11	3.47846e-13	5.02193	7.36768	37	0.00075535	0.00379332	499	0.000862677	1	0.0222291	1.77645	19.1392	34	334	0.0277325	0.101796	region_1075,region_1314,region_1614,region_1653,region_214,region_2522,region_2716,region_306,region_3296,region_33,region_3554,region_373,region_379,region_3826,region_4530,region_4545,region_4965,region_5002,region_5074,region_5560,region_6079,region_6179,region_6484,region_6519,region_6697,region_6853,region_712,region_7300,region_7447,region_7693,region_7990,region_812,region_8453,region_8532…	Adora2a,Adra1d,Adrb1,Agtr1a,Chrm1,Cyba,Dbh,Ddah1,Erap1,F11r,F2r,F2rl1,Ffar3,Fli1,Hsd11b2,Icam1,Kcnj8,Kcnn2,Lrp5,Met,Myl3,P2ry2,Pdgfb,Ptprj,Ptpro,Ramp2,Rasl10b,Ren1,Scn4b,Tac4,Tnni2,Trpm4,Ttn,Uts2b
GO Biological Process	GO:0034341	response to interferon-gamma	249	6.71063e-15	8.62853e-11	3.46527e-13	10.4388	2.01173	21	0.000206247	0.00215296	155	4.73428e-06	0.0608734	0.000392732	3.37763	5.32919	18	93	0.0146819	0.193548	region_1314,region_1614,region_1679,region_1907,region_2603,region_3386,region_373,region_3911,region_4158,region_5430,region_5820,region_5922,region_6417,region_6916,region_6978,region_7165,region_7171,region_8476,region_8522,region_8824,region_9108	Adamts13,Aif1,Ccl12,Ccl2,Ccl3,Ccl4,Ccl5,Cd86,Cldn1,Cxcl16,Gbp3,H2-Q7,Icam1,Il12b,Irgm2,Slc11a1,Snca,Trim21
GO Biological Process	GO:0002449	lymphocyte mediated immunity	250	6.9012e-15	8.87356e-11	3.54942e-13	9.05114	2.54112	23	0.000260521	0.00235801	219	2.80509e-05	0.360679	0.00164693	2.88322	6.58986	19	115	0.0154976	0.165217	region_1314,region_1380,region_1391,region_1614,region_1766,region_3038,region_3084,region_373,region_3796,region_4178,region_4548,region_5088,region_5275,region_5277,region_5530,region_5820,region_6205,region_7349,region_7737,region_9107,region_9108,region_9157,region_9549	C1qa,C1qb,C1qc,C1rb,C1rl,C1s2,Cd55,Cd74,Ctsc,Fcer1g,H2-Ab1,Icam1,Il12b,Il4ra,Myo1g,Rftn1,Serping1,Slc11a1,Stx11
GO Biological Process	GO:0090066	regulation of anatomical structure size	251	6.98805e-15	8.98523e-11	3.57977e-13	4.33545	9.91824	43	0.00101684	0.00440845	831	0.00677939	1	0.104897	1.51242	25.7864	39	450	0.0318108	0.0866667	region_1060,region_1209,region_1216,region_1294,region_1314,region_158,region_1607,region_1608,region_1614,region_17,region_214,region_2242,region_2716,region_286,region_3296,region_3370,region_373,region_379,region_4199,region_4235,region_4335,region_4530,region_4965,region_51,region_5560,region_6079,region_6812,region_6952,region_721,region_7274,region_7300,region_7303,region_7409,region_7450,r…	Add2,Adora2a,Adra1d,Adrb1,Agtr1a,Arhgap18,Arpc1b,Chrm1,Dbh,Disc1,Eln,F2r,F2rl1,Fstl4,Golga4,Icam1,Inf2,Kcnj8,Lamtor5,Lrrk2,Mgll,Msn,Nck2,Nckap1l,Nkx6-1,Nrp1,P2rx7,P2ry2,Pdgfb,Plek,Plxna4,Ret,Rgma,Sema5a,Tlr2,Tmod1,Trpm4,Uts2b,Wnt7a
GO Biological Process	GO:0044089	positive regulation of cellular component biogenesis	252	7.76523e-15	9.98453e-11	3.96212e-13	4.32177	9.94962	43	0.00102005	0.00440845	836	0.00702441	1	0.108038	1.50907	25.8437	39	451	0.0318108	0.0864745	region_1294,region_1314,region_158,region_1608,region_1614,region_1685,region_182,region_1889,region_2048,region_2057,region_2217,region_2503,region_3112,region_373,region_379,region_3870,region_3893,region_415,region_4191,region_4199,region_4235,region_4545,region_5115,region_5209,region_5497,region_6402,region_6430,region_6519,region_6625,region_6801,region_6838,region_6952,region_7409,region_7…	5330417C22Rik,Amigo2,Arpc1b,Asap1,Cldn1,Clstn2,Ephb1,Eps8l2,F2rl1,Fes,Has3,Hrk,Icam1,Ikzf1,Il1rap,Kdr,Lims1,Met,Msn,Nck2,Nckap1l,Nrp1,Ntrk1,Ntrk2,P2rx7,Plek,Prox1,Ptprj,Rapgef3,Ripor2,Sh3pxd2b,Tal1,Tlr4,Tlr6,Tnf,Tpbg,Wnt1,Wnt4,Wnt7a
GO Biological Process	GO:0098655	cation transmembrane transport	253	8.32539e-15	1.07048e-10	4.23114e-13	3.9164	12.2561	48	0.00125653	0.00492106	1572	0.043502	1	0.35582	1.31352	31.9751	42	558	0.0342577	0.0752688	region_1200,region_1279,region_1294,region_1306,region_1615,region_1653,region_1907,region_214,region_2716,region_2739,region_2963,region_300,region_3137,region_3191,region_3327,region_3371,region_3572,region_3712,region_3790,region_4265,region_4277,region_4367,region_4418,region_5049,region_5054,region_5262,region_5386,region_5392,region_5771,region_5977,region_6079,region_6108,region_6142,regio…	AA467197,AI854703,Ano1,Cacna1a,Cacng2,Cacng3,Catsper4,Ccl3,Cox6a2,Cox8b,F2r,Grin1,Grm7,Hpn,Itpr3,Kcnh3,Kcnj8,Kcnk13,Kcnk15,Kcnk18,Kcnmb4,Kcnn2,Orai3,P2rx5,P2rx7,P2ry12,Plcg2,Ptprc,Scn4b,Slc11a1,Slc12a4,Slc24a4,Slc30a3,Slc39a8,Slc46a1,Slc4a4,Slc6a15,Trf,Trpm2,Trpm4,Trpm5,Trpm8
GO Biological Process	GO:0098662	inorganic cation transmembrane transport	254	8.80271e-15	1.13185e-10	4.45611e-13	4.13372	10.8861	45	0.00111606	0.00461349	1315	0.0285486	1	0.279147	1.37216	28.4223	39	496	0.0318108	0.078629	region_1200,region_1279,region_1294,region_1306,region_1615,region_1653,region_1907,region_214,region_2716,region_2739,region_2963,region_3137,region_3191,region_3327,region_3371,region_3572,region_3712,region_3790,region_4265,region_4277,region_4367,region_4418,region_5049,region_5054,region_5262,region_5386,region_5392,region_5771,region_5977,region_6079,region_6108,region_6142,region_6663,regi…	AA467197,AI854703,Cacna1a,Cacng2,Cacng3,Catsper4,Ccl3,Cox6a2,Cox8b,F2r,Grin1,Grm7,Hpn,Itpr3,Kcnh3,Kcnj8,Kcnk13,Kcnk15,Kcnk18,Kcnmb4,Kcnn2,Orai3,P2rx7,P2ry12,Plcg2,Ptprc,Scn4b,Slc11a1,Slc12a4,Slc24a4,Slc30a3,Slc39a8,Slc46a1,Slc4a4,Trf,Trpm2,Trpm4,Trpm5,Trpm8
GO Biological Process	GO:0006915	apoptotic process	255	8.95554e-15	1.1515e-10	4.5157e-13	3.07583	21.4576	66	0.00219988	0.00676646	1449	0.036802	1	0.32657	1.26644	46.5874	59	813	0.048124	0.0725707	region_1135,region_1294,region_1374,region_2138,region_2503,region_2547,region_2687,region_2697,region_2808,region_2824,region_2834,region_2927,region_3118,region_3151,region_3271,region_3329,region_3611,region_375,region_4191,region_4244,region_4332,region_443,region_477,region_488,region_4936,region_5089,region_5099,region_5177,region_5301,region_5430,region_5530,region_5582,region_5939,region_…	1600014C10Rik,App,Bcl2a1a,Bcl2a1b,Bcl2a1d,Birc3,Casp4,Casp7,Casp8,Chac1,Ctsc,Dab2ip,Dcc,Ddx47,Dmpk,Egln3,Epha2,Erbb3,Eva1a,Faim2,Fgfr3,Foxl2,Gm29094,Hrk,Htatip2,Ifit2,Il1a,Il1b,Krt8,Lrp5,Ltbr,Mef2c,Megf10,Myc,Nfatc4,Nfkb1,Nlrp1a,Nod1,Nsg1,P2rx7,Perp,Pik3cg,Prkcb,Rassf6,Shh,Shisa5,Six3,Snca,Spi1,Tgfb2,Tgfbr2,Tmem117,Tnf,Tnfaip8,Tnfrsf11a,Tnfrsf21,Tnfrsf9,Tradd,Traf3ip2
GO Biological Process	GO:0098660	inorganic ion transmembrane transport	256	1.05365e-14	1.35478e-10	5.29211e-13	3.82482	12.8111	49	0.00131342	0.00502358	1662	0.0553812	1	0.428455	1.28492	33.465	43	584	0.0350734	0.0736301	region_1200,region_1279,region_1294,region_1306,region_1615,region_1653,region_1744,region_1907,region_214,region_2652,region_2716,region_2739,region_2963,region_3137,region_3191,region_3327,region_3371,region_3572,region_3712,region_3790,region_4072,region_4265,region_4277,region_4367,region_4418,region_5049,region_5054,region_5262,region_5386,region_5392,region_5771,region_5977,region_6079,regi…	AA467197,AI854703,Ano1,Cacna1a,Cacng2,Cacng3,Catsper4,Ccl3,Cox6a2,Cox8b,F2r,Gabra2,Gabrr2,Glra1,Grin1,Grm7,Hpn,Itpr3,Kcnh3,Kcnj8,Kcnk13,Kcnk15,Kcnk18,Kcnmb4,Kcnn2,Orai3,P2rx7,P2ry12,Plcg2,Ptprc,Scn4b,Slc11a1,Slc12a4,Slc24a4,Slc30a3,Slc39a8,Slc46a1,Slc4a4,Trf,Trpm2,Trpm4,Trpm5,Trpm8
GO Biological Process	GO:0061564	axon development	257	1.07385e-14	1.38076e-10	5.37261e-13	4.10992	10.9491	45	0.00112253	0.00461349	120	1.07138e-06	0.0137758	0.000114799	2.22104	18.91	42	330	0.0342577	0.127273	region_1073,region_1088,region_1135,region_120,region_1209,region_138,region_1467,region_150,region_1571,region_158,region_1607,region_1685,region_1859,region_1901,region_2231,region_2268,region_2522,region_2743,region_293,region_3265,region_329,region_3739,region_415,region_420,region_466,region_4740,region_488,region_5177,region_5327,region_549,region_5534,region_5723,region_5735,region_5939,re…	App,Artn,B3gnt2,Chrnb2,Cnp,Cxcl12,Dcc,Dst,Efna2,Epha3,Epha4,Epha5,Ephb1,Erbb2,Fez1,Fezf1,Fgfr3,Foxd1,Gdf7,Isl1,Jam3,Lhx4,Lhx9,Neurog2,Nfib,Nptx1,Nr2e1,Nr4a2,Nrp1,Nrp2,Ntrk1,Pam,Pax6,Plp1,Plxna4,Ptpro,Sema5a,Shh,Tgfb2,Tlr9,Tsku,Tspan2
GO Biological Process	GO:0043122	regulation of I-kappaB kinase/NF-kappaB signaling	258	1.15298e-14	1.4825e-10	5.74611e-13	6.20821	4.83231	30	0.000495418	0.00307566	312	0.000146865	1	0.00605254	2.1515	12.5494	27	219	0.0220228	0.123288	region_1216,region_1259,region_1859,region_1889,region_2190,region_2687,region_2716,region_2927,region_341,region_37,region_3736,region_379,region_4191,region_4316,region_488,region_5277,region_5301,region_5681,region_6160,region_6430,region_655,region_717,region_721,region_7220,region_7981,region_8199,region_8256,region_8762,region_8778,region_9034	App,Card6,Card9,Casp8,Cd74,Dab2ip,Eda,F2r,F2rl1,Flna,Il1b,Ltbr,Nlrx1,Nod1,Prkcb,Shisa5,Tank,Ticam2,Tlr2,Tlr4,Tlr6,Tlr9,Tnf,Tradd,Traf3ip2,Trim62,Zc3hav1
GO Biological Process	GO:0002696	positive regulation of leukocyte activation	259	1.23333e-14	1.58581e-10	6.12284e-13	4.35454	9.64511	42	0.000988836	0.00430593	82	1.31571e-07	0.00169173	2.06309e-05	2.49301	15.6438	39	273	0.0318108	0.142857	region_1278,region_1285,region_1467,region_1818,region_1859,region_1889,region_2090,region_2195,region_2537,region_2687,region_3097,region_310,region_3611,region_379,region_4178,region_4235,region_457,region_470,region_488,region_5067,region_5177,region_5209,region_5269,region_5277,region_5590,region_5820,region_6018,region_6100,region_6110,region_6417,region_6430,region_6978,region_7409,region_7…	Adora3,Aif1,App,Ccl2,Ccl5,Cd1d1,Cd244,Cd74,Cd83,Cd86,Chrnb2,Dock8,F2rl1,Fam49b,Fcer1g,H2-M3,H2-T23,Hlx,Igfbp2,Ikzf1,Il12b,Il1b,Il1rl2,Il4ra,Itpkb,Lgals9,Mef2c,Nck2,Nckap1l,Nfatc2,Ptprc,Shh,Stat5a,Tgfbr2,Tlr4,Tlr6,Tlr9,Tnfsf13b,Tnfsf9
GO Biological Process	GO:0003013	circulatory system process	260	1.24684e-14	1.60319e-10	6.1661e-13	4.91863	7.52242	37	0.000771214	0.00379332	537	0.00123277	1	0.0295175	1.73999	19.5404	34	341	0.0277325	0.0997067	region_1075,region_1314,region_1614,region_1653,region_214,region_2522,region_2716,region_306,region_3296,region_33,region_3554,region_373,region_379,region_3826,region_4530,region_4545,region_4965,region_5002,region_5074,region_5560,region_6079,region_6179,region_6484,region_6519,region_6697,region_6853,region_712,region_7300,region_7447,region_7693,region_7990,region_812,region_8453,region_8532…	Adora2a,Adra1d,Adrb1,Agtr1a,Chrm1,Cyba,Dbh,Ddah1,Erap1,F11r,F2r,F2rl1,Ffar3,Fli1,Hsd11b2,Icam1,Kcnj8,Kcnn2,Lrp5,Met,Myl3,P2ry2,Pdgfb,Ptprj,Ptpro,Ramp2,Rasl10b,Ren1,Scn4b,Tac4,Tnni2,Trpm4,Ttn,Uts2b
GO Biological Process	GO:0012501	programmed cell death	261	1.35923e-14	1.7477e-10	6.69617e-13	3.01725	22.2057	67	0.00227657	0.00686898	1647	0.0533246	1	0.416301	1.23474	48.593	60	848	0.0489396	0.0707547	region_1135,region_1294,region_1374,region_1685,region_2138,region_2503,region_2547,region_2687,region_2697,region_2808,region_2824,region_2834,region_2927,region_3118,region_3151,region_3271,region_3329,region_3611,region_375,region_4191,region_4244,region_4332,region_443,region_477,region_488,region_4936,region_5089,region_5099,region_5177,region_5301,region_5430,region_5530,region_5582,region_…	1600014C10Rik,App,Bcl2a1a,Bcl2a1b,Bcl2a1d,Birc3,Casp4,Casp7,Casp8,Chac1,Ctsc,Dab2ip,Dcc,Ddx47,Dmpk,Egln3,Epha2,Erbb3,Eva1a,Faim2,Fgfr3,Foxl2,Gm29094,Hrk,Htatip2,Ifit2,Il1a,Il1b,Krt8,Lrp5,Ltbr,Mef2c,Megf10,Myc,Nfatc4,Nfkb1,Nlrp1a,Nod1,Nsg1,Ntrk1,P2rx7,Perp,Pik3cg,Prkcb,Rassf6,Shh,Shisa5,Six3,Snca,Spi1,Tgfb2,Tgfbr2,Tmem117,Tnf,Tnfaip8,Tnfrsf11a,Tnfrsf21,Tnfrsf9,Tradd,Traf3ip2
GO Biological Process	GO:0002263	cell activation involved in immune response	262	1.44065e-14	1.85239e-10	7.07017e-13	7.36139	3.53194	26	0.000362102	0.00266557	217	2.68322e-05	0.345008	0.0015899	2.52305	9.51232	24	166	0.0195759	0.144578	region_102,region_1314,region_1391,region_1586,region_1614,region_1818,region_1907,region_3193,region_373,region_379,region_4031,region_4178,region_457,region_4650,region_488,region_5386,region_5820,region_5914,region_6296,region_6430,region_7467,region_8012,region_81,region_8522,region_86,region_9108	Adora3,Apbb1ip,App,Ccl3,Cd244,Cd300a,Cd86,F2rl1,Fcer1g,Gm13277,Gm13278,H2-M3,Icam1,Il12b,Irf4,Lat2,Lyn,Myo1f,Plcg2,Slc11a1,Stx11,Tac4,Tlr4,Tyrobp
GO Biological Process	GO:0048598	embryonic morphogenesis	263	1.45755e-14	1.87411e-10	7.1259e-13	3.10624	20.6036	64	0.00211233	0.00656141	210	2.01667e-05	0.259303	0.00123478	1.72562	35.929	62	627	0.050571	0.0988836	region_1035,region_1101,region_1154,region_1375,region_1870,region_192,region_1985,region_206,region_236,region_2361,region_2509,region_2592,region_2858,region_286,region_3108,region_3112,region_3151,region_3342,region_3469,region_3611,region_3634,region_4156,region_4199,region_4677,region_4936,region_5115,region_5177,region_5232,region_5269,region_528,region_5488,region_5534,region_5852,region_5…	Aldh1a2,Alx3,Apela,Casp8,Chst11,Dlx2,Dusp2,Epha2,Ets2,Foxe1,Foxl2,Fzd1,Fzd2,Gata4,Gdf7,Grem2,Hhex,Hlx,Hoxa5,Hoxc10,Hoxd10,Hoxd11,Hoxd12,Hoxd13,Hoxd9,Hpn,Irx3,Itga8,Kdf1,Lnpk,Lrig3,Lrp5,Macf1,Map3k20,Mef2c,Mesp1,Mmp15,Myc,Otx1,Pax5,Pax6,Pdgfra,Plpp3,Prox1,Ret,Rgma,Ripor2,Shh,Six3,Six4,Sobp,Spint1,Tal1,Tgfb2,Tgfbr2,Tgif1,Tifab,Wnt1,Wnt4,Wnt7a,Yap1,Zic5
GO Biological Process	GO:0050921	positive regulation of chemotaxis	264	1.5532e-14	1.99711e-10	7.56479e-13	8.1847	2.9323	24	0.000300625	0.00246053	135	1.87832e-06	0.0241515	0.0001789	3.01785	7.62131	23	133	0.0187602	0.172932	region_1474,region_158,region_1907,region_2231,region_2280,region_3112,region_379,region_4545,region_4773,region_5277,region_5723,region_6417,region_6519,region_6838,region_6916,region_6978,region_7409,region_7450,region_7707,region_8476,region_8532,region_9222,region_9246,region_9256	Aif1,Artn,C3ar1,Ccl2,Ccl3,Ccl4,Ccl5,Cd74,Cdh13,Cxcl10,Cxcl12,Cxcl2,F2rl1,Kdr,Met,Nckap1l,Nrp1,Pdgfb,Ptprj,Ripor2,S1pr1,Scg2,Sema5a
GO Biological Process	GO:0045637	regulation of myeloid cell differentiation	265	1.68582e-14	2.16763e-10	8.17975e-13	6.36831	4.5538	29	0.000466865	0.00297314	384	0.000349042	1	0.0116874	2.10762	11.8617	25	207	0.0203915	0.120773	region_11,region_1135,region_1345,region_1907,region_2537,region_2784,region_2916,region_3084,region_3097,region_3611,region_3893,region_4031,region_4191,region_4382,region_4650,region_4936,region_5209,region_5277,region_5820,region_6190,region_6625,region_6734,region_7409,region_768,region_8199,region_8770,region_8976,region_9107,region_959	C1qc,Casp8,Ccl3,Cd74,Evi2b,Fes,Fgfr3,Hist1h4k,Hist1h4n,Hoxa5,Ikzf1,Il12b,Itpkb,Lyn,Mef2c,Myc,Nckap1l,Ocstamp,Rassf2,Spi1,Stat5a,Tal1,Tmem178,Tnf,Tyrobp
GO Biological Process	GO:0070663	regulation of leukocyte proliferation	266	1.93663e-14	2.49011e-10	9.36132e-13	4.60265	8.47338	39	0.000868708	0.00399836	45	9.19505e-09	0.00011823	2.62733e-06	2.88183	12.4921	36	218	0.0293638	0.165138	region_1073,region_1285,region_1467,region_1818,region_1859,region_2090,region_2195,region_2603,region_2687,region_3097,region_310,region_3112,region_3611,region_4031,region_4235,region_4382,region_5067,region_5177,region_5277,region_5436,region_5590,region_581,region_5820,region_5914,region_6018,region_6110,region_6417,region_6430,region_6978,region_7289,region_739,region_7409,region_81,region_8…	Aif1,Ccl12,Ccl5,Cd1d1,Cd244,Cd300a,Cd74,Cd86,Chrnb2,Erbb2,Gal,H2-M3,H2-T23,Igfbp2,Ikzf3,Il12b,Il1b,Lgals9,Lyn,Mef2c,Nck2,Nckap1l,Nfatc2,Ocstamp,Pde5a,Ptprc,Ripor2,Shh,Stat5a,Tgfbr2,Tlr4,Tlr9,Tnfrsf21,Tnfsf13b,Tnfsf9,Vsir
GO Biological Process	GO:0008283	cell proliferation	267	1.93684e-14	2.49039e-10	9.32732e-13	3.43723	16.0013	55	0.00164048	0.00563871	369	0.000322736	1	0.0112459	1.63123	32.4909	53	567	0.04323	0.0934744	region_102,region_1143,region_1278,region_1294,region_181,region_217,region_2231,region_2242,region_2537,region_2609,region_3159,region_3500,region_3611,region_379,region_415,region_4191,region_4199,region_4248,region_5115,region_5177,region_5277,region_5327,region_5564,region_5820,region_5852,region_5909,region_5939,region_6219,region_6430,region_6519,region_6668,region_6952,region_7342,region_7…	Bglap2,Cd151,Cd74,Cd86,Cdh13,Cxcl12,Disc1,Dock8,Elf4,Emx2,Epha2,Ephb1,F2rl1,Fat4,Fbxl7,Gm13277,Gm13278,Gnai2,Hgf,Hhex,Igfbp4,Il12b,Itpkb,Lgr5,Lhx9,Lipg,Lta,Mef2c,Megf10,Met,Msn,Ncf1,Nes,Nkx6-1,P2rx7,Pdgfb,Prox1,Ptprc,Sema5a,Shh,Six3,Slc11a1,Tcf19,Tex19.1,Tgfa,Tgfb2,Tlr4,Tnf,Tspan1,Wnt1,Wnt4,Wnt7a,Yap1
GO Biological Process	GO:0002703	regulation of leukocyte mediated immunity	268	1.94539e-14	2.50138e-10	9.33351e-13	6.91781	3.90297	27	0.000400141	0.00276809	184	1.15972e-05	0.149116	0.000810415	2.53479	10.2573	26	179	0.0212072	0.145251	region_1216,region_1294,region_1818,region_1859,region_1922,region_214,region_3097,region_310,region_3769,region_379,region_3893,region_4031,region_4178,region_4191,region_457,region_470,region_581,region_5820,region_5914,region_6018,region_6430,region_6668,region_721,region_7737,region_9023,region_9157,region_9318	Adora3,Cd1d1,Cd300a,Cd55,F2rl1,Fam49b,Fcer1g,Fes,H2-M3,H2-T23,Il12b,Il4ra,Klrb1b,Lgals9,Lta,Lyn,P2rx7,Ptprc,Stat5a,Susd4,Tlr2,Tlr4,Tlr9,Tnf,Trpm4,Vsir
GO Biological Process	GO:0032680	regulation of tumor necrosis factor production	269	1.97474e-14	2.53913e-10	9.43913e-13	8.59905	2.67471	23	0.000274217	0.00235801	252	5.77875e-05	0.743032	0.00294854	2.74025	6.93368	19	121	0.0154976	0.157025	region_1216,region_1859,region_1889,region_1907,region_203,region_2354,region_306,region_310,region_3736,region_4086,region_4169,region_4178,region_4316,region_5099,region_5820,region_6430,region_655,region_721,region_7322,region_8476,region_9034,region_9318,region_9421	Card9,Ccl2,Ccl3,Cd14,Cyba,Fcer1g,H2-T23,Il12b,Isl1,Lgals9,Ly96,Nfatc4,Nod1,Tlr2,Tlr4,Tlr6,Tlr9,Trim30a,Zbtb20
GO Biological Process	GO:0043123	positive regulation of I-kappaB kinase/NF-kappaB signaling	270	2.14106e-14	2.75298e-10	1.01962e-12	7.23343	3.59442	26	0.000368508	0.00266557	250	5.7677e-05	0.741611	0.00296645	2.46242	9.34041	23	163	0.0187602	0.141104	region_1216,region_1859,region_1889,region_2190,region_2687,region_2716,region_2927,region_341,region_37,region_3736,region_379,region_4191,region_4316,region_488,region_5277,region_5301,region_6160,region_6430,region_655,region_717,region_721,region_7981,region_8199,region_8256,region_8762,region_9034	App,Card9,Casp8,Cd74,Eda,F2r,F2rl1,Flna,Il1b,Ltbr,Nod1,Prkcb,Shisa5,Ticam2,Tlr2,Tlr4,Tlr6,Tlr9,Tnf,Tradd,Traf3ip2,Trim62,Zc3hav1
GO Biological Process	GO:0050715	positive regulation of cytokine secretion	271	2.33662e-14	3.00442e-10	1.10864e-12	8.52857	2.69682	23	0.000276483	0.00235801	207	1.96112e-05	0.252161	0.00121817	2.86083	6.99098	20	122	0.0163132	0.163934	region_1216,region_1294,region_1900,region_1907,region_203,region_2048,region_2116,region_2687,region_2716,region_2824,region_379,region_3936,region_4191,region_5582,region_6430,region_721,region_7300,region_7906,region_81,region_9004,region_9157,region_9318,region_9323	Agtr1a,Casp4,Ccl3,Cd14,Cd244,Cd300c2,F2r,F2rl1,Hk1,Il1a,Il1b,Il1rap,Il4ra,Lgals9,Nlrp1a,P2rx7,Tlr2,Tlr4,Tnf,Unc93b1
GO Biological Process	GO:0006959	humoral immune response	272	2.36067e-14	3.03535e-10	1.11594e-12	8.5243	2.69817	23	0.000276622	0.00235801	191	1.37008e-05	0.176165	0.000922328	2.84087	7.3921	21	129	0.0171289	0.162791	region_102,region_11,region_1380,region_1766,region_2927,region_3038,region_3084,region_310,region_3611,region_3796,region_4191,region_4548,region_5088,region_5275,region_6205,region_6668,region_67,region_768,region_7737,region_790,region_9107,region_959,region_985	C1qa,C1qb,C1qc,C1rb,C1rl,C1s2,Cd55,Cd83,Gm13277,Gm13278,H2-Ab1,H2-T23,Hist1h2bf,Hist1h2bn,Hist1h2br,Lta,Mef2c,Serping1,Tnf,Tnfrsf21,Traf3ip2
GO Biological Process	GO:0002831	regulation of response to biotic stimulus	273	2.54417e-14	3.27129e-10	1.19827e-12	7.99614	3.00145	24	0.000307715	0.00246053	289	0.000106556	1	0.00474084	2.5476	7.85053	20	137	0.0163132	0.145985	region_1216,region_1259,region_2365,region_2687,region_2927,region_306,region_330,region_341,region_3508,region_3575,region_379,region_4086,region_414,region_4169,region_4607,region_5615,region_5820,region_6417,region_655,region_721,region_748,region_9034,region_9190,region_9318	Apobec3,Bmp6,Ccl5,Cd37,Cyba,Dtx3l,F2rl1,Il12b,Il1b,Lgals9,Ly86,Ly96,Mb21d1,Nlrx1,Nod1,Parp9,Sash1,Tlr2,Traf3ip2,Zc3hav1
GO Biological Process	GO:0043406	positive regulation of MAP kinase activity	274	2.6768e-14	3.44183e-10	1.25614e-12	6.82346	3.95694	27	0.000405674	0.00276809	189	1.28295e-05	0.164962	0.000872815	2.52071	10.3146	26	180	0.0212072	0.144444	region_1073,region_1294,region_181,region_1859,region_1889,region_2592,region_2687,region_2910,region_4191,region_4331,region_5089,region_5277,region_5735,region_6163,region_6430,region_6519,region_7289,region_7303,region_7364,region_748,region_7641,region_8532,region_8778,region_9023,region_9222,region_9416,region_9431	Cd74,Dab2ip,Epha4,Erbb2,Fzd8,Grm4,Hgf,Il1b,Lrrk2,Map3k20,Mdfic,Met,P2rx7,Pde5a,Pdgfb,Pik3cg,Ptprc,Sash1,Tgfa,Tlr4,Tlr6,Tlr9,Tnf,Tnfrsf11a,Tpd52l1,Trf
GO Biological Process	GO:1903555	regulation of tumor necrosis factor superfamily cytokine production	275	2.76054e-14	3.5495e-10	1.29073e-12	8.45923	2.71892	23	0.00027875	0.00235801	265	7.26221e-05	0.933775	0.00352368	2.69569	7.04828	19	123	0.0154976	0.154472	region_1216,region_1859,region_1889,region_1907,region_203,region_2354,region_306,region_310,region_3736,region_4086,region_4169,region_4178,region_4316,region_5099,region_5820,region_6430,region_655,region_721,region_7322,region_8476,region_9034,region_9318,region_9421	Card9,Ccl2,Ccl3,Cd14,Cyba,Fcer1g,H2-T23,Il12b,Isl1,Lgals9,Ly96,Nfatc4,Nod1,Tlr2,Tlr4,Tlr6,Tlr9,Trim30a,Zbtb20
GO Biological Process	GO:0022409	positive regulation of cell-cell adhesion	276	3.76442e-14	4.84029e-10	1.75373e-12	4.61713	8.23023	38	0.000843779	0.00389584	75	8.99732e-08	0.00115687	1.5425e-05	2.78205	11.8617	33	207	0.0269168	0.15942	region_1278,region_1285,region_1314,region_1397,region_1614,region_1818,region_1985,region_2090,region_2195,region_2537,region_2687,region_3097,region_310,region_373,region_4191,region_4235,region_470,region_5067,region_5177,region_5209,region_5269,region_5277,region_5590,region_5820,region_6018,region_6100,region_6110,region_6417,region_6978,region_7409,region_790,region_81,region_8476,region_85…	Aif1,Ccl2,Ccl5,Cd1d1,Cd244,Cd74,Cd83,Cd86,Dock8,Fam49b,H2-M3,H2-T23,Hlx,Icam1,Igfbp2,Ikzf1,Il12b,Il1b,Il1rl2,Il4ra,Itpkb,Kif26b,Lgals9,Nck2,Nckap1l,Plpp3,Ptprc,Shh,Stat5a,Tgfbr2,Tnf,Tnfsf13b,Tnfsf9
GO Biological Process	GO:0034220	ion transmembrane transport	277	3.99363e-14	5.13501e-10	1.85379e-12	3.33034	16.8151	56	0.00172392	0.00574123	3113	0.186063	1	0.768519	1.1391	43.8942	50	766	0.040783	0.0652742	region_1200,region_1279,region_1294,region_1306,region_1467,region_1615,region_1653,region_1744,region_1907,region_214,region_2652,region_2716,region_2739,region_2963,region_2984,region_300,region_3137,region_3191,region_3327,region_3371,region_3572,region_3712,region_3790,region_4072,region_4265,region_4277,region_4367,region_4418,region_5049,region_5054,region_5262,region_5346,region_5386,regio…	AA467197,AI854703,Ano1,Aqp5,Cacna1a,Cacng2,Cacng3,Catsper4,Ccl3,Chrnb2,Cox6a2,Cox8b,F2r,Gabra2,Gabrr2,Gjd3,Glra1,Grin1,Grm7,Hpn,Hvcn1,Itpr3,Kcnh3,Kcnj8,Kcnk13,Kcnk15,Kcnk18,Kcnmb4,Kcnn2,Orai3,P2rx5,P2rx7,P2ry12,Plcg2,Ptprc,Scn4b,Slc11a1,Slc12a4,Slc24a4,Slc25a13,Slc30a3,Slc39a8,Slc46a1,Slc4a4,Slc6a15,Trf,Trpm2,Trpm4,Trpm5,Trpm8
GO Biological Process	GO:0071363	cellular response to growth factor stimulus	278	4.25598e-14	5.47234e-10	1.96847e-12	4.38145	9.12939	40	0.000935964	0.00410088	644	0.00280187	1	0.0559417	1.60567	23.6662	38	413	0.0309951	0.0920097	region_1073,region_1075,region_1135,region_158,region_1685,region_2057,region_2197,region_2361,region_286,region_3469,region_3611,region_407,region_4199,region_4677,region_488,region_5102,region_5115,region_5430,region_549,region_5534,region_581,region_5939,region_5964,region_6110,region_6155,region_6318,region_6417,region_6838,region_7171,region_7641,region_8476,region_8724,region_8778,region_88…	Adamts7,App,Bex1,Bmp6,Ccl2,Ccl5,Cldn1,Dab2ip,Dusp15,Erbb2,Fat4,Fez1,Fgf5,Fgfr3,Fut8,Gata4,Gata5,Gdf7,Hgf,Kdr,Mef2c,Nrp1,Nrp2,Ntrk1,Ntrk2,Pdgfb,Pdgfra,Ramp2,Rgma,Snca,Sostdc1,Spint1,Tgfb2,Tgfbr2,Vsir,Wnt1,Wnt4,Wnt7a
GO Biological Process	GO:0009725	response to hormone	279	4.28555e-14	5.51036e-10	1.97504e-12	3.46265	15.3062	53	0.00156922	0.00543367	2630	0.130712	1	0.639046	1.18355	39.7111	47	693	0.0383361	0.0678211	region_1075,region_1314,region_133,region_1374,region_1614,region_1637,region_1793,region_2195,region_2242,region_287,region_293,region_3010,region_306,region_3097,region_3265,region_3266,region_329,region_3469,region_3611,region_373,region_375,region_3826,region_4031,region_4191,region_4677,region_4812,region_5002,region_507,region_5115,region_5585,region_5852,region_5939,region_6089,region_6110…	Abcb4,Agtr1a,Aif1,Bglap2,Bmp6,Ccl2,Cldn1,Cxcl2,Cyba,Eif4ebp1,Epha3,Epha5,Gal,Gata4,Ghr,Gjb2,Gm21973,Hcrtr1,Hhex,Hpn,Hsd11b2,Icam1,Igfbp2,Inhbb,Isl1,Lhb,Lrp5,Lyn,Mc4r,Mef2c,Nfkb1,Nkx6-1,Nr2e1,Nr2f1,Nr4a2,P2ry6,Pde3b,Ramp2,Ren1,Snrpn,Stat5a,Tbc1d4,Tgfb2,Tgfbr2,Thrb,Tnf,Wnt1
GO Biological Process	GO:0060627	regulation of vesicle-mediated transport	280	5.01427e-14	6.44735e-10	2.30262e-12	4.17043	10.0709	42	0.00103249	0.00430593	905	0.00895577	1	0.127241	1.48601	26.2448	39	458	0.0318108	0.0851528	region_1216,region_1793,region_1919,region_203,region_212,region_2509,region_2687,region_2712,region_279,region_3049,region_306,region_3327,region_3500,region_379,region_3893,region_4031,region_4068,region_4178,region_4191,region_4418,region_457,region_5386,region_5430,region_5914,region_6466,region_652,region_6952,region_7171,region_721,region_7303,region_7364,region_7409,region_7764,region_8476…	Adora3,Apela,Cacna1a,Ccl2,Cd14,Cd300a,Cdh13,Cyba,Ehd2,F2rl1,Fcer1g,Fes,Hck,Il1b,Il4ra,Ldlr,Lgals9,Lrrk2,Lyn,Mertk,Msn,Nckap1l,Ophn1,Plcg2,Rab15,Rab20,Sfrp4,Slc11a1,Snca,Syt12,Syt2,Tbc1d1,Tbc1d2b,Tbc1d4,Tbc1d8b,Tlr2,Tnf,Trf,Tspan1
GO Biological Process	GO:0070848	response to growth factor	281	5.69446e-14	7.32193e-10	2.60567e-12	4.24434	9.65991	41	0.000990354	0.0042034	733	0.00419299	1	0.0735518	1.55742	25.0415	39	437	0.0318108	0.0892449	region_1073,region_1075,region_1135,region_158,region_1685,region_2057,region_2197,region_2361,region_286,region_3469,region_3611,region_407,region_4199,region_4677,region_488,region_5102,region_5115,region_5430,region_549,region_5534,region_581,region_5939,region_5964,region_6110,region_6155,region_6318,region_6417,region_6838,region_7171,region_7342,region_7641,region_8476,region_8724,region_87…	Adamts7,App,Bex1,Bmp6,Ccl2,Ccl5,Cldn1,Dab2ip,Dusp15,Epha2,Erbb2,Fat4,Fez1,Fgf5,Fgfr3,Fut8,Gata4,Gata5,Gdf7,Hgf,Kdr,Mef2c,Nrp1,Nrp2,Ntrk1,Ntrk2,Pdgfb,Pdgfra,Ramp2,Rgma,Snca,Sostdc1,Spint1,Tgfb2,Tgfbr2,Vsir,Wnt1,Wnt4,Wnt7a
GO Biological Process	GO:0023014	signal transduction by protein phosphorylation	282	6.08309e-14	7.82163e-10	2.77363e-12	6.04357	4.79849	29	0.000491951	0.00297314	385	0.000351667	1	0.0117448	2.07181	12.5494	26	219	0.0212072	0.118721	region_1073,region_1135,region_1474,region_1907,region_2537,region_2592,region_2603,region_2687,region_2733,region_3191,region_3611,region_3778,region_4191,region_456,region_4936,region_5939,region_5972,region_6110,region_6190,region_6417,region_6812,region_6838,region_7303,region_7364,region_8476,region_8778,region_9108,region_9431,region_958	Ccl12,Ccl2,Ccl3,Ccl5,Dab2ip,Dok1,Erbb2,Fgfr3,Il1b,Itpkb,Kcnh3,Kdr,Lrrk2,Map3k20,Mapk8ip1,Mdfic,Mef2c,Myc,Ret,Scg2,Slc11a1,Tgfb2,Tgfbr2,Tnf,Tnik,Trf
GO Biological Process	GO:0040008	regulation of growth	283	6.41802e-14	8.25229e-10	2.916e-12	3.58173	13.9597	50	0.00143118	0.0051261	1894	0.0583326	1	0.396009	1.26817	36.2729	46	633	0.0375204	0.0726698	region_1073,region_1135,region_1209,region_1216,region_1375,region_158,region_1607,region_1679,region_17,region_2188,region_2195,region_2242,region_2427,region_286,region_2861,region_306,region_3097,region_3266,region_3469,region_3523,region_3611,region_4003,region_4191,region_4545,region_4677,region_4794,region_488,region_5209,region_5269,region_5820,region_5939,region_6100,region_6110,region_62…	Adrb1,App,Cxcl16,Cyba,Dab2ip,Disc1,Erbb2,Fgfr3,Fhl1,Fstl4,Gal,Gata4,Ghr,Golga4,Gpr21,Hlx,Hpn,Igfbp2,Igfbp4,Igfbp7,Ikzf1,Il12b,Lta,Mef2c,Mgll,Nkx6-1,Nrp1,Osgin1,Osm,Plxna4,Prox1,Ptprj,Rasal1,Rgma,Sema5a,Sgk3,Sh3pxd2b,Six4,Stat5a,Syt2,Tgfb2,Tgfbr2,Tlr2,Tmc8,Tnf,Yap1
GO Biological Process	GO:1903039	positive regulation of leukocyte cell-cell adhesion	284	6.74732e-14	8.6757e-10	3.05482e-12	4.77139	7.54497	36	0.000773526	0.00369079	58	2.08941e-08	0.000268657	4.63202e-06	3.07377	10.0854	31	176	0.0252855	0.176136	region_1278,region_1285,region_1314,region_1614,region_1818,region_2090,region_2195,region_2537,region_2687,region_3097,region_310,region_373,region_4191,region_4235,region_470,region_5067,region_5177,region_5209,region_5269,region_5277,region_5590,region_5820,region_6018,region_6100,region_6110,region_6417,region_6978,region_7409,region_790,region_81,region_8476,region_8522,region_9023,region_91…	Aif1,Ccl2,Ccl5,Cd1d1,Cd244,Cd74,Cd83,Cd86,Dock8,Fam49b,H2-M3,H2-T23,Hlx,Icam1,Igfbp2,Ikzf1,Il12b,Il1b,Il1rl2,Il4ra,Itpkb,Lgals9,Nck2,Nckap1l,Ptprc,Shh,Stat5a,Tgfbr2,Tnf,Tnfsf13b,Tnfsf9
GO Biological Process	GO:0002366	leukocyte activation involved in immune response	285	7.0898e-14	9.11606e-10	3.19862e-12	7.2137	3.46563	25	0.000355303	0.00256305	250	5.7677e-05	0.741611	0.00296645	2.46242	9.34041	23	163	0.0187602	0.141104	region_102,region_1314,region_1391,region_1586,region_1614,region_1818,region_1907,region_3193,region_373,region_379,region_4031,region_4178,region_457,region_4650,region_5386,region_5820,region_5914,region_6296,region_6430,region_7467,region_8012,region_81,region_8522,region_86,region_9108	Adora3,Apbb1ip,Ccl3,Cd244,Cd300a,Cd86,F2rl1,Fcer1g,Gm13277,Gm13278,H2-M3,Icam1,Il12b,Irf4,Lat2,Lyn,Myo1f,Plcg2,Slc11a1,Stx11,Tac4,Tlr4,Tyrobp
GO Biological Process	GO:0001818	negative regulation of cytokine production	286	8.06818e-14	1.03741e-09	3.6273e-12	5.97395	4.85441	29	0.000497684	0.00297314	395	0.000377559	1	0.0122903	2.0624	12.6067	26	220	0.0212072	0.118182	region_1216,region_1259,region_1374,region_1859,region_1889,region_2354,region_279,region_375,region_379,region_4191,region_5585,region_581,region_5820,region_5939,region_6430,region_6519,region_7166,region_721,region_7342,region_7409,region_7641,region_790,region_8532,region_8583,region_8762,region_9108,region_9193,region_9318,region_985	Cd83,Epha2,F2rl1,Hgf,Il12b,Inhbb,Lgals9,Mertk,Met,Nckap1l,Ndrg2,Nfkb1,Nlrx1,Sigirr,Slc11a1,Tgfb2,Ticam2,Tlr2,Tlr4,Tlr6,Tlr9,Tnf,Tnfrsf21,Tnfrsf9,Trim30a,Vsir
GO Biological Process	GO:0007010	cytoskeleton organization	287	1.02837e-13	1.32227e-09	4.60723e-12	2.83192	24.3651	69	0.00249796	0.00707402	2107	0.0844627	1	0.515435	1.18942	53.8076	64	939	0.0522023	0.0681576	region_1046,region_1060,region_1069,region_1105,region_1123,region_1198,region_1299,region_1375,region_138,region_148,region_158,region_1608,region_1647,region_1651,region_1685,region_1907,region_1932,region_2138,region_2361,region_2437,region_2592,region_2603,region_2712,region_2743,region_2847,region_3167,region_3400,region_3554,region_37,region_3893,region_4191,region_4235,region_4260,region_4…	Add2,Agap2,Aif1,Antxr1,Arhgap25,Arpc1b,Casp4,Ccl12,Ccl2,Ccl3,Cnn1,Cnp,Dclk2,Diaph2,Disc1,Dst,Ehd2,Eln,F11r,Fat1,Fes,Flna,Fmnl1,Fry,Gas2l3,Ina,Inf2,Insrr,Krt8,Lmna,Lrrc6,Map3k20,Map6,Map7d2,Mark1,Mybpc2,Nav1,Nck2,Nckap1l,Nrp1,Ophn1,Parvg,Pax6,Pdgfb,Pdgfra,Pdlim4,Plek,Prox1,Prph,S1pr1,Sh3d19,Shh,Six4,Spef2,Stmn3,Tmod1,Tnf,Tnik,Trf,Ttn,Tuba8,Wtip,Xirp1,Zmynd10
GO Biological Process	GO:0043270	positive regulation of ion transport	288	1.08681e-13	1.39742e-09	4.85214e-12	5.6784	5.28318	30	0.000541642	0.00307566	298	0.0001215	1	0.00524245	2.10867	13.7528	29	240	0.0236542	0.120833	region_1294,region_1467,region_1653,region_1907,region_2231,region_2603,region_2687,region_2716,region_2783,region_3296,region_3532,region_37,region_4003,region_4265,region_4773,region_4965,region_5386,region_5430,region_5665,region_5715,region_6417,region_6916,region_7171,region_739,region_743,region_8047,region_8476,region_8537,region_9222,region_9416	Abcb4,Adora2a,Ccl12,Ccl2,Ccl3,Ccl4,Ccl5,Cemip,Chrm1,Chrnb2,Cxcl10,Cxcl12,Erfe,F2r,Fhl1,Flna,Gal,Il1b,Nat8l,P2rx7,P2ry12,Pdgfb,Plcg2,Scn4b,Slc6a1,Snca,Sri,Tcaf1,Tnfrsf11a
GO Biological Process	GO:0051607	defense response to virus	289	1.13297e-13	1.45678e-09	5.04075e-12	6.7157	3.87152	26	0.000396916	0.00266557	306	0.000130124	1	0.00546775	2.28866	10.4865	24	183	0.0195759	0.131148	region_102,region_1347,region_1859,region_2116,region_2354,region_2697,region_341,region_3508,region_3575,region_3733,region_3736,region_379,region_3936,region_4316,region_4322,region_4773,region_4795,region_5615,region_5820,region_602,region_6079,region_8005,region_8522,region_8713,region_8762,region_9023	Apobec3,Card9,Cd86,Cxcl10,F2rl1,Gm13277,Gm13278,Ifit2,Il10rb,Il12b,Irf5,Kcnj8,Mb21d1,Nlrc5,Oasl1,Ptprc,Tagap,Ticam2,Tlr9,Trim12c,Trim30a,Unc93b1,Zbp1,Zc3hav1
GO Biological Process	GO:0007204	positive regulation of cytosolic calcium ion concentration	290	1.19876e-13	1.54137e-09	5.31507e-12	6.39447	4.2224	27	0.000432889	0.00276809	363	0.000294185	1	0.0104205	2.17008	11.0595	24	193	0.0195759	0.124352	region_1013,region_1279,region_1294,region_1306,region_1907,region_214,region_2280,region_2361,region_2716,region_3082,region_3137,region_3327,region_379,region_4343,region_4418,region_5089,region_5386,region_5392,region_6663,region_6864,region_7300,region_7359,region_7693,region_7707,region_86,region_9023,region_9256	Adcy5,Adra1d,Agtr1a,C3ar1,Cacna1a,Catsper4,Ccl3,Cxcl2,F2r,F2rl1,Gna15,Gpr6,Grin1,Itpr3,P2rx7,Pdgfra,Pik3cg,Plcg2,Pth1r,Ptprc,S1pr1,Tac4,Trpm2,Trpm4
GO Biological Process	GO:0021700	developmental maturation	291	1.28861e-13	1.65689e-09	5.69379e-12	5.85995	4.94885	29	0.000507366	0.00297314	419	0.000498686	1	0.0153034	2.02557	12.8359	26	224	0.0212072	0.116071	region_1101,region_1135,region_1547,region_2823,region_3137,region_3327,region_3640,region_3826,region_4102,region_420,region_4418,region_4765,region_488,region_5115,region_5939,region_6425,region_6625,region_6663,region_6812,region_6838,region_7359,region_773,region_8187,region_8213,region_8976,region_8987,region_9222,region_9256,region_9461	Aldh1a2,App,Bfsp1,Cacna1a,Catsper4,Fam20c,Fat4,Fgfr3,Grin1,Hoxa5,Kdr,Lyl1,Neurog2,Nfia,Nr4a2,Pdgfb,Plp1,Pth1r,Rab32,Ren1,Ret,S1pr1,Six3,Tal1,Tgfb2,Wnt1
GO Biological Process	GO:0045766	positive regulation of angiogenesis	292	1.35031e-13	1.73623e-09	5.946e-12	7.8232	2.93997	23	0.000301412	0.00235801	262	6.99183e-05	0.89901	0.00343133	2.62422	7.62131	20	133	0.0163132	0.150376	region_1075,region_158,region_1685,region_2280,region_2509,region_2687,region_2824,region_293,region_329,region_33,region_3469,region_451,region_4677,region_6110,region_6838,region_6893,region_7447,region_7450,region_748,region_753,region_7641,region_7981,region_9421	Apela,C3ar1,Ddah1,Erap1,Gata4,Hgf,Il1a,Il1b,Isl1,Kdr,Notch4,Nr2e1,Nrp1,Ntrk1,Prkcb,Ramp2,Rapgef3,Sash1,Sema5a,Tgfbr2
GO Biological Process	GO:0045862	positive regulation of proteolysis	293	1.59642e-13	2.05267e-09	7.00571e-12	4.89844	6.94099	34	0.000711605	0.00348575	864	0.00788111	1	0.117286	1.61172	17.9932	29	314	0.0236542	0.0923567	region_1308,region_231,region_2547,region_2687,region_2716,region_286,region_3151,region_4031,region_4191,region_488,region_4936,region_5430,region_5530,region_5735,region_6190,region_655,region_660,region_6812,region_6827,region_6878,region_7171,region_7220,region_7303,region_7431,region_7680,region_7690,region_7965,region_8199,region_8243,region_8422,region_8778,region_9004,region_9034,region_9…	Antxr1,App,Casp8,Cbfa2t3,Ctsc,Dab2ip,Disc1,Egln3,Epha4,F2r,Foxl2,Hpn,Il1b,Lrrk2,Lyn,Myc,Nkd2,Nlrp1a,Nod1,Pcolce,Perp,Psme1,Ret,Rgma,Rnf180,Sh3d19,Snca,Tank,Tnf
GO Biological Process	GO:1904018	positive regulation of vasculature development	294	1.79049e-13	2.30221e-09	7.83064e-12	7.28674	3.29366	24	0.000337672	0.00246053	296	0.000121053	1	0.00525843	2.45954	8.53816	21	149	0.0171289	0.14094	region_1075,region_158,region_1685,region_2280,region_2509,region_2687,region_2824,region_293,region_329,region_33,region_3469,region_451,region_4677,region_6110,region_6838,region_6893,region_7447,region_7450,region_748,region_753,region_7641,region_7981,region_9222,region_9421	Apela,C3ar1,Ddah1,Erap1,Gata4,Hgf,Il1a,Il1b,Isl1,Kdr,Notch4,Nr2e1,Nrp1,Ntrk1,Pdgfb,Prkcb,Ramp2,Rapgef3,Sash1,Sema5a,Tgfbr2
GO Biological Process	GO:0009615	response to virus	295	2.19665e-13	2.82445e-09	9.57441e-12	5.51992	5.43486	30	0.000557193	0.00307566	468	0.000709317	1	0.019488	1.92374	14.555	28	254	0.0228385	0.110236	region_102,region_1347,region_1859,region_2116,region_2354,region_2697,region_3386,region_341,region_3508,region_3575,region_3733,region_3736,region_379,region_3936,region_4191,region_4316,region_4322,region_4773,region_4795,region_5615,region_5820,region_602,region_6079,region_6417,region_8005,region_8522,region_8713,region_8762,region_9023,region_9318	Apobec3,Card9,Ccl5,Cd86,Cxcl10,F2rl1,Gm13277,Gm13278,Ifit2,Il10rb,Il12b,Irf5,Irgm2,Kcnj8,Lgals9,Mb21d1,Nlrc5,Oasl1,Ptprc,Tagap,Ticam2,Tlr9,Tnf,Trim12c,Trim30a,Unc93b1,Zbp1,Zc3hav1
GO Biological Process	GO:0070555	response to interleukin-1	296	2.32006e-13	2.98313e-09	1.00782e-11	8.65452	2.42648	21	0.000248767	0.00215296	333	0.00019015	1	0.00734219	2.67268	6.36064	17	111	0.0138662	0.153153	region_1314,region_1374,region_1614,region_1907,region_2603,region_2824,region_306,region_3463,region_373,region_375,region_5430,region_6417,region_6916,region_7171,region_7220,region_7707,region_8476,region_8778,region_9416,region_9422,region_9499	Adamts7,Ccl12,Ccl2,Ccl3,Ccl4,Ccl5,Cxcl2,Cyba,Dab2ip,Icam1,Il1a,Il1rl2,Nfkb1,Rps6ka4,Snca,Tank,Tnfrsf11a
GO Biological Process	GO:0021954	central nervous system neuron development	297	2.67358e-13	3.4377e-09	1.15747e-11	9.99455	1.90104	19	0.000194898	0.00194792	167	6.41726e-06	0.0825131	0.000494091	3.44963	4.92807	17	86	0.0138662	0.197674	region_1209,region_1467,region_1571,region_158,region_1607,region_1901,region_1932,region_20,region_2057,region_293,region_329,region_415,region_420,region_466,region_5735,region_6318,region_7065,region_8187,region_8422	Chrnb2,Dcc,Dclk2,Disc1,Epha4,Ephb1,Neurog2,Nfib,Nr2e1,Nr4a2,Nrp1,Nrp2,Ntrk2,Pam,Plxna4,Sall3,Tsku
GO Biological Process	GO:0021953	central nervous system neuron differentiation	298	3.03614e-13	3.90386e-09	1.31002e-11	4.30449	8.82798	38	0.000905063	0.00389584	40	5.0072e-09	6.43825e-05	1.60956e-06	3.05843	11.1168	34	194	0.0277325	0.175258	region_1209,region_1467,region_1571,region_158,region_1607,region_1870,region_1901,region_1932,region_20,region_2057,region_2242,region_293,region_329,region_3327,region_3342,region_3739,region_415,region_4199,region_420,region_4418,region_466,region_5115,region_5177,region_5191,region_5534,region_5735,region_6048,region_6318,region_6625,region_7065,region_7255,region_7838,region_8187,region_8337…	Cacna1a,Chrnb2,Dcc,Dclk2,Disc1,Dlx2,Dmrt3,Emx1,Epha4,Ephb1,Faim2,Gdf7,Hoxc10,Hoxd10,Isl1,Lhx4,Neurog2,Nfib,Nkx6-1,Nr2e1,Nr4a2,Nrp1,Nrp2,Ntrk2,Pam,Pax6,Plxna4,Prox1,Sall3,Shh,Tal1,Tsku,Wnt1,Wnt7a
GO Biological Process	GO:0048002	antigen processing and presentation of peptide antigen	299	3.44008e-13	4.42326e-09	1.47935e-11	13.1603	1.21578	16	0.000124644	0.00164035	178	1.02422e-05	0.131694	0.000739856	4.1248	3.15167	13	55	0.0106036	0.236364	region_1110,region_1163,region_136,region_1766,region_1818,region_2116,region_310,region_3189,region_33,region_3936,region_4158,region_4178,region_4548,region_5277,region_9108,region_9409	Cd74,Erap1,Fcer1g,H2-Ab1,H2-M3,H2-Q4,H2-Q6,H2-Q7,H2-T22,H2-T23,H2-T24,Slc11a1,Unc93b1
GO Biological Process	GO:0051924	regulation of calcium ion transport	300	3.67851e-13	4.72982e-09	1.57661e-11	5.83723	4.7968	28	0.000491778	0.00287062	466	0.000706916	1	0.0195054	2.01049	12.4348	25	217	0.0203915	0.115207	region_1294,region_1314,region_1614,region_1859,region_1907,region_214,region_2231,region_2603,region_2716,region_2783,region_3014,region_306,region_3296,region_373,region_4031,region_4248,region_4265,region_4773,region_5089,region_5386,region_5430,region_6417,region_6916,region_7142,region_7171,region_743,region_8476,region_9222	Adora2a,Ahnak,Ccl12,Ccl2,Ccl3,Ccl4,Ccl5,Cemip,Cracr2b,Cxcl10,Cxcl12,Cyba,F2r,Gnai2,Hrc,Icam1,Lyn,P2rx7,P2ry12,Pdgfb,Pik3cg,Plcg2,Snca,Sri,Tlr9
GO Biological Process	GO:2000379	positive regulation of reactive oxygen species metabolic process	301	3.97451e-13	5.11042e-09	1.69782e-11	9.76661	1.9454	19	0.000199447	0.00194792	316	0.0001512	1	0.00615229	2.94119	5.09998	15	89	0.0122349	0.168539	region_1216,region_1314,region_1614,region_1818,region_1889,region_2687,region_306,region_373,region_379,region_4191,region_5430,region_6110,region_6430,region_6978,region_7171,region_721,region_7300,region_7447,region_9222	Agtr1a,Aif1,Cyba,Ddah1,F2rl1,H2-M3,Icam1,Il1b,Pdgfb,Snca,Tgfbr2,Tlr2,Tlr4,Tlr6,Tnf
GO Biological Process	GO:0000165	MAPK cascade	302	4.0995e-13	5.27113e-09	1.74541e-11	6.64973	3.75955	25	0.000385437	0.00256305	383	0.000348097	1	0.0116863	2.23211	9.85614	22	172	0.0179445	0.127907	region_1135,region_1474,region_1907,region_2537,region_2592,region_2603,region_2687,region_2733,region_3611,region_3778,region_4191,region_456,region_4936,region_5972,region_6190,region_6417,region_6812,region_6838,region_7303,region_7364,region_8476,region_8778,region_9108,region_9431,region_958	Ccl12,Ccl2,Ccl3,Ccl5,Dab2ip,Dok1,Fgfr3,Il1b,Itpkb,Kdr,Lrrk2,Map3k20,Mapk8ip1,Mdfic,Mef2c,Myc,Ret,Scg2,Slc11a1,Tnf,Tnik,Trf
GO Biological Process	GO:0042326	negative regulation of phosphorylation	303	4.73226e-13	6.08475e-09	2.00817e-11	4.05217	9.87126	40	0.00101202	0.00410088	1269	0.0259525	1	0.262961	1.40232	25.6718	36	448	0.0293638	0.0803571	region_1022,region_1180,region_1294,region_1433,region_1464,region_1576,region_1985,region_2467,region_2687,region_2916,region_3177,region_3296,region_3778,region_379,region_4031,region_4235,region_4404,region_4545,region_4698,region_5430,region_5852,region_5914,region_594,region_5972,region_611,region_6430,region_6853,region_6878,region_6898,region_7166,region_7171,region_7255,region_7303,region…	Adora2a,Birc3,Cbfa2t3,Cd300a,Dab2ip,Dusp16,Dusp2,F2rl1,Gprc5a,Hgf,Hhex,Il1b,Lrp5,Lrrc15,Lrrc4,Lrrk1,Lrrk2,Lyn,Mapk8ip1,Nck2,Ndrg2,P2rx7,Pax6,Pkia,Plpp3,Prkag2,Prkar2b,Prr5l,Ptprc,Ptprj,Ptprr,Rassf2,Snca,Spred2,Timp3,Tlr4
GO Biological Process	GO:0007409	axonogenesis	304	5.32341e-13	6.84484e-09	2.25159e-11	3.95204	10.3744	41	0.0010636	0.0042034	161	5.28492e-06	0.0679535	0.000422071	2.18138	17.4201	38	304	0.0309951	0.125	region_1073,region_1135,region_120,region_1209,region_138,region_1467,region_150,region_1571,region_158,region_1607,region_1685,region_1859,region_1901,region_2231,region_2268,region_2522,region_2743,region_293,region_329,region_3739,region_415,region_420,region_466,region_488,region_5177,region_5327,region_549,region_5534,region_5723,region_5735,region_5939,region_6318,region_6598,region_7065,re…	App,Artn,B3gnt2,Chrnb2,Cnp,Cxcl12,Dcc,Dst,Efna2,Epha4,Epha5,Ephb1,Erbb2,Fez1,Fezf1,Fgfr3,Foxd1,Gdf7,Isl1,Lhx4,Lhx9,Neurog2,Nfib,Nptx1,Nr2e1,Nr4a2,Nrp1,Nrp2,Ntrk1,Pam,Pax6,Plxna4,Ptpro,Sema5a,Shh,Tgfb2,Tlr9,Tsku
GO Biological Process	GO:0030162	regulation of proteolysis	305	5.47134e-13	7.03505e-09	2.30657e-11	3.00791	19.615	59	0.00201096	0.0060488	1496	0.0419357	1	0.360434	1.27398	41.6021	53	726	0.04323	0.0730028	region_1308,region_157,region_1922,region_231,region_2467,region_2547,region_2687,region_2712,region_2716,region_286,region_3151,region_3296,region_3329,region_3911,region_4031,region_4191,region_4244,region_451,region_4691,region_488,region_4936,region_5088,region_51,region_5115,region_5177,region_5430,region_5530,region_5735,region_5864,region_594,region_5964,region_6190,region_651,region_655,r…	A2m,Adora2a,Antxr1,App,Bcl2a1d,Birc3,Casp8,Cbfa2t3,Cd55,Chac1,Ctla2b,Ctsc,Dab2ip,Disc1,Egln3,Epha4,F2r,Foxl2,Hgf,Hpn,Il1b,Lamtor5,Lrrk2,Lyn,Myc,Nkd2,Nlrp1a,Nod1,Notch4,Ophn1,Pcolce,Perp,Plaur,Psmb8,Psme1,Ptpn3,Ret,Rgma,Rnf180,Serpinb1a,Serping1,Sh3d19,Shh,Snca,Spint1,Spopl,Susd4,Tank,Timp3,Tnf,Tnfaip8,Trim21,Wnt1
GO Biological Process	GO:0001933	negative regulation of protein phosphorylation	306	6.36766e-13	8.18754e-09	2.67567e-11	4.19733	9.05338	38	0.000928171	0.00389584	1199	0.0205603	1	0.220487	1.44364	23.5516	34	411	0.0277325	0.0827251	region_1022,region_1180,region_1294,region_1433,region_1464,region_1576,region_1985,region_2467,region_2687,region_2916,region_3177,region_3296,region_3778,region_379,region_4031,region_4235,region_4404,region_4545,region_4698,region_5430,region_5852,region_5914,region_5972,region_611,region_6430,region_6853,region_6898,region_7166,region_7171,region_7255,region_7303,region_7641,region_8147,regio…	Adora2a,Cd300a,Dab2ip,Dusp16,Dusp2,F2rl1,Gprc5a,Hgf,Hhex,Il1b,Lrp5,Lrrc15,Lrrc4,Lrrk1,Lrrk2,Lyn,Mapk8ip1,Nck2,Ndrg2,P2rx7,Pax6,Pkia,Plpp3,Prkag2,Prkar2b,Prr5l,Ptprc,Ptprj,Ptprr,Rassf2,Snca,Spred2,Timp3,Tlr4
GO Biological Process	GO:0030595	leukocyte chemotaxis	307	6.49792e-13	8.35502e-09	2.7215e-11	8.18922	2.56435	21	0.000262902	0.00215296	180	1.03505e-05	0.133086	0.000739367	2.98309	6.70446	20	117	0.0163132	0.17094	region_1279,region_1306,region_1474,region_1679,region_1907,region_214,region_2522,region_2603,region_2687,region_4178,region_4641,region_4773,region_5089,region_5939,region_6417,region_6916,region_7409,region_7707,region_8476,region_9222,region_9256	Ccl12,Ccl2,Ccl3,Ccl4,Ccl5,Cxcl10,Cxcl16,Cxcl2,Fcer1g,Il1b,Nckap1l,Pdgfb,Pik3cg,Ptpro,S1pr1,Scg2,Slamf8,Tgfb2,Trpm2,Trpm4
GO Biological Process	GO:0002819	regulation of adaptive immune response	308	7.19889e-13	9.25633e-09	3.0053e-11	7.19773	3.19545	23	0.000327604	0.00235801	278	9.00634e-05	1	0.0041656	2.51008	8.36625	21	146	0.0171289	0.143836	region_1285,region_1294,region_1818,region_1922,region_2090,region_214,region_2733,region_310,region_3611,region_4178,region_4191,region_470,region_5269,region_5277,region_581,region_5820,region_6018,region_6100,region_6668,region_7737,region_9023,region_9108,region_9157	Cd1d1,Cd55,Cd74,Fam49b,Fcer1g,H2-M3,H2-T23,Hlx,Il12b,Il4ra,Loxl3,Lta,Mef2c,P2rx7,Ptprc,Slc11a1,Susd4,Tnf,Tnfsf13b,Trpm4,Vsir
GO Biological Process	GO:0044802	single-organism membrane organization	309	7.86443e-13	1.01121e-08	3.27252e-11	3.39074	14.4511	49	0.00148156	0.00502358	2762	0.158984	1	0.740121	1.16872	37.6481	44	657	0.0358891	0.0669711	region_1069,region_1075,region_1294,region_138,region_1391,region_1505,region_1508,region_17,region_198,region_269,region_2743,region_2808,region_3049,region_3271,region_3327,region_3414,region_37,region_4178,region_4191,region_4244,region_4332,region_4404,region_4418,region_456,region_5232,region_5406,region_5430,region_5949,region_5961,region_6425,region_6466,region_652,region_6936,region_7171,…	Abcb4,Arhgap44,Atp8b5,Bcl2a1a,Bcl2a1b,Bcl2a1d,Cacna1a,Cd9,Cmtm8,Cnp,Crb1,Cstad,Dmpk,Dysf,Ehd2,F11r,Fat4,Fcer1g,Flna,Gm29094,Golga4,Gpr179,Lmna,Lrrc4,Macf1,Marveld1,Ncf1,Nkd2,Nsg1,P2rx7,Rab20,Rab32,Ramp1,Ramp2,Reep1,Rftn1,Sh3pxd2b,Snca,Stx11,Syt12,Syt2,Tnf,Tnik,Wnt4
GO Biological Process	GO:0043086	negative regulation of catalytic activity	310	8.88814e-13	1.14284e-08	3.68657e-11	3.11337	17.6657	55	0.00181113	0.00563871	3152	0.193727	1	0.790275	1.13149	45.9571	52	802	0.0424144	0.0648379	region_1046,region_1180,region_1374,region_1433,region_1464,region_1576,region_1859,region_2209,region_2467,region_2687,region_3159,region_3177,region_3296,region_330,region_3329,region_375,region_3778,region_4031,region_414,region_4191,region_4244,region_4404,region_4545,region_4691,region_488,region_5088,region_51,region_5227,region_5430,region_5852,region_5914,region_5939,region_594,region_596…	A2m,Adora2a,App,Bcl2a1d,Birc3,Cd300a,Ctla2b,Dab2ip,Dtx3l,Dusp16,Dusp2,F11r,Fry,Gmip,Gprc5a,Grm7,Hgf,Hhex,Hpn,Il1b,Lamtor5,Lrch1,Lrp5,Lrrc15,Lrrc4,Lrrk2,Lyn,Mapk8ip1,Nckap1l,Nes,Nfkb1,P2ry13,Parp9,Pkia,Plaur,Ppp1r14d,Ppp1r36,Prkag2,Prkar2b,Ptprc,Ptprj,Serpinb1a,Serping1,Snca,Spint1,Spred2,Tgfb2,Timp3,Tlr9,Tmbim1,Tnf,Tnfaip8
GO Biological Process	GO:2000021	regulation of ion homeostasis	311	9.07552e-13	1.16693e-08	3.75219e-11	6.11289	4.25331	26	0.000436058	0.00266557	470	0.000711749	1	0.0194716	2.07966	11.0595	23	193	0.0187602	0.119171	region_1279,region_1294,region_1306,region_1907,region_214,region_2716,region_2783,region_306,region_3296,region_4003,region_4031,region_4367,region_4773,region_5386,region_5392,region_5430,region_5771,region_5864,region_6663,region_6838,region_6864,region_7171,region_7303,region_743,region_8658,region_9023	Adora2a,Catsper4,Ccl3,Cemip,Comt,Cxcl10,Cyba,F2r,Fhl1,Hrc,Itpr3,Kdr,Lrrk2,Lyn,P2rx7,Plcg2,Ptpn3,Ptprc,Slc30a3,Snca,Sri,Trpm2,Trpm4
GO Biological Process	GO:0050670	regulation of lymphocyte proliferation	312	9.2646e-13	1.19124e-08	3.81808e-11	4.35075	8.27444	36	0.000848312	0.00369079	62	3.45883e-08	0.000444737	7.17318e-06	2.83893	11.9764	34	209	0.0277325	0.162679	region_1073,region_1285,region_1467,region_1818,region_1859,region_2090,region_2195,region_2687,region_3097,region_310,region_3112,region_3611,region_4031,region_4235,region_5067,region_5177,region_5277,region_5436,region_5590,region_581,region_5820,region_5914,region_6018,region_6110,region_6417,region_6430,region_6978,region_7289,region_739,region_7409,region_81,region_8522,region_8543,region_9…	Aif1,Ccl5,Cd1d1,Cd244,Cd300a,Cd74,Cd86,Chrnb2,Erbb2,Gal,H2-M3,H2-T23,Igfbp2,Ikzf3,Il12b,Il1b,Lgals9,Lyn,Mef2c,Nck2,Nckap1l,Nfatc2,Pde5a,Ptprc,Ripor2,Shh,Stat5a,Tgfbr2,Tlr4,Tlr9,Tnfrsf21,Tnfsf13b,Tnfsf9,Vsir
GO Biological Process	GO:0032944	regulation of mononuclear cell proliferation	313	9.98373e-13	1.28371e-08	4.1013e-11	4.33916	8.29654	36	0.000850578	0.00369079	65	3.90404e-08	0.000501981	7.72278e-06	2.82541	12.0336	34	210	0.0277325	0.161905	region_1073,region_1285,region_1467,region_1818,region_1859,region_2090,region_2195,region_2687,region_3097,region_310,region_3112,region_3611,region_4031,region_4235,region_5067,region_5177,region_5277,region_5436,region_5590,region_581,region_5820,region_5914,region_6018,region_6110,region_6417,region_6430,region_6978,region_7289,region_739,region_7409,region_81,region_8522,region_8543,region_9…	Aif1,Ccl5,Cd1d1,Cd244,Cd300a,Cd74,Cd86,Chrnb2,Erbb2,Gal,H2-M3,H2-T23,Igfbp2,Ikzf3,Il12b,Il1b,Lgals9,Lyn,Mef2c,Nck2,Nckap1l,Nfatc2,Pde5a,Ptprc,Ripor2,Shh,Stat5a,Tgfbr2,Tlr4,Tlr9,Tnfrsf21,Tnfsf13b,Tnfsf9,Vsir
GO Biological Process	GO:0002822	regulation of adaptive immune response based on somatic recombination of immune receptors built from immunoglobulin superfamily domains	314	9.9872e-13	1.28415e-08	4.08966e-11	7.50805	2.93019	22	0.000300409	0.00225549	271	7.78338e-05	1	0.00369294	2.60464	7.67862	20	134	0.0163132	0.149254	region_1285,region_1294,region_1818,region_1922,region_2090,region_214,region_2733,region_310,region_3611,region_4178,region_4191,region_470,region_5269,region_581,region_5820,region_6018,region_6100,region_6668,region_7737,region_9023,region_9108,region_9157	Cd1d1,Cd55,Fam49b,Fcer1g,H2-M3,H2-T23,Hlx,Il12b,Il4ra,Loxl3,Lta,Mef2c,P2rx7,Ptprc,Slc11a1,Susd4,Tnf,Tnfsf13b,Trpm4,Vsir
GO Biological Process	GO:0001525	angiogenesis	315	1.30208e-12	1.67421e-08	5.31495e-11	3.91909	10.2065	40	0.00104639	0.00410088	144	3.0305e-06	0.0389662	0.000270599	2.2328	17.019	38	297	0.0309951	0.127946	region_1075,region_1088,region_1141,region_1474,region_158,region_181,region_2231,region_2361,region_2603,region_2910,region_37,region_3806,region_415,region_4199,region_451,region_5089,region_5099,region_5177,region_5961,region_6110,region_6232,region_6318,region_6625,region_6838,region_6893,region_7342,region_7450,region_753,region_7800,region_8171,region_8178,region_8199,region_8476,region_855…	Ackr3,Casp8,Ccl12,Ccl2,Cdh13,Cxcl12,Dab2ip,Epha2,Ephb1,Flna,Fzd8,Htatip2,Jam3,Kdr,Mcam,Ndnf,Nfatc4,Notch4,Nrp1,Nrp2,Pde3b,Pdgfra,Pik3cg,Plcd1,Ramp1,Ramp2,Rapgef3,Rnf213,S1pr1,Scg2,Sema5a,Shh,Tal1,Tgfa,Tgfbr2,Thsd7a,Tnfaip2,Wnt7a
GO Biological Process	GO:0002218	activation of innate immune response	316	1.51172e-12	1.94377e-08	6.15117e-11	9.81076	1.83472	18	0.000188099	0.0018454	349	0.000246307	1	0.00907453	2.94355	4.75616	14	83	0.0114193	0.168675	region_1216,region_1859,region_1889,region_203,region_2116,region_3386,region_3508,region_3936,region_4086,region_4169,region_5615,region_6430,region_6564,region_721,region_8522,region_8713,region_8762,region_9549	Cd14,Cd86,Irgm2,Ly96,Mb21d1,Pik3ap1,Rftn1,Ticam2,Tlr2,Tlr4,Tlr6,Tlr9,Trim12c,Unc93b1
GO Biological Process	GO:0051251	positive regulation of lymphocyte activation	317	1.6293e-12	2.09495e-08	6.60868e-11	4.1604	8.89338	37	0.000911767	0.00379332	113	8.25285e-07	0.0106115	9.39072e-05	2.49301	13.6381	34	238	0.0277325	0.142857	region_1278,region_1285,region_1467,region_1818,region_1859,region_2090,region_2195,region_2537,region_2687,region_3097,region_310,region_3611,region_4235,region_470,region_5067,region_5177,region_5209,region_5269,region_5277,region_5590,region_5820,region_6018,region_6100,region_6110,region_6417,region_6430,region_6978,region_7409,region_790,region_81,region_8476,region_8522,region_8543,region_9…	Aif1,Ccl2,Ccl5,Cd1d1,Cd244,Cd74,Cd83,Cd86,Chrnb2,Dock8,Fam49b,H2-M3,H2-T23,Hlx,Igfbp2,Ikzf1,Il12b,Il1b,Il1rl2,Il4ra,Itpkb,Lgals9,Mef2c,Nck2,Nckap1l,Nfatc2,Ptprc,Shh,Stat5a,Tgfbr2,Tlr4,Tlr9,Tnfsf13b,Tnfsf9
GO Biological Process	GO:0090596	sensory organ morphogenesis	318	1.86399e-12	2.39672e-08	7.53685e-11	4.89314	6.3354	31	0.000649518	0.00317818	738	0.00429559	1	0.0748411	1.70254	16.446	28	287	0.0228385	0.097561	region_1135,region_1375,region_1571,region_198,region_2057,region_236,region_2858,region_3108,region_3112,region_3151,region_3652,region_415,region_4156,region_4936,region_5115,region_5209,region_5488,region_6190,region_6827,region_6838,region_6853,region_7194,region_7255,region_7342,region_773,region_7868,region_8337,region_9047,region_9222,region_9461,region_9565	Aqp5,Bhlhe23,Crb1,Epha2,Ephb1,Fgfr3,Fjx1,Foxl2,Fzd2,Hpn,Ikzf1,Itga8,Kdr,Lrig3,Lrp5,Myc,Ntrk2,Otx1,Pax6,Pdgfb,Prox1,Ripor2,Six3,Six4,Sobp,Tifab,Tsku,Wnt1
GO Biological Process	GO:0010959	regulation of metal ion transport	319	2.00238e-12	2.57466e-08	8.07104e-11	4.46043	7.62258	34	0.000781482	0.00348575	950	0.00976387	1	0.132152	1.55903	19.8842	31	347	0.0252855	0.0893372	region_1294,region_1314,region_1614,region_1653,region_1859,region_1907,region_214,region_2231,region_2603,region_2716,region_2783,region_3014,region_306,region_3271,region_3296,region_37,region_373,region_4003,region_4031,region_4248,region_4265,region_4773,region_5089,region_5386,region_5430,region_5864,region_6417,region_6916,region_7142,region_7171,region_739,region_743,region_8476,region_9222	Adora2a,Ahnak,Ccl12,Ccl2,Ccl3,Ccl4,Ccl5,Cemip,Cracr2b,Cxcl10,Cxcl12,Cyba,Dmpk,F2r,Fhl1,Flna,Gal,Gnai2,Hrc,Icam1,Lyn,P2rx7,P2ry12,Pdgfb,Pik3cg,Plcg2,Ptpn3,Scn4b,Snca,Sri,Tlr9
GO Biological Process	GO:0045446	endothelial cell differentiation	320	2.06561e-12	2.65597e-08	8.29989e-11	10.5374	1.6133	17	0.000165399	0.00174288	254	5.87458e-05	0.755353	0.00297383	3.34678	4.18313	14	73	0.0114193	0.191781	region_1035,region_1314,region_1614,region_3116,region_34,region_373,region_379,region_4199,region_6519,region_6838,region_6952,region_753,region_7990,region_8337,region_8532,region_8824,region_9256	Cldn1,Cnmd,F11r,F2rl1,Icam1,Kdr,Mesp1,Met,Msn,Prox1,Rap2c,Rapgef3,S1pr1,Wnt7a
GO Biological Process	GO:0032147	activation of protein kinase activity	321	2.19802e-12	2.82621e-08	8.80439e-11	5.20589	5.57061	29	0.00057111	0.00297314	552	0.00141884	1	0.0330497	1.86237	14.4977	27	253	0.0220228	0.106719	region_1294,region_181,region_2424,region_2592,region_2687,region_2716,region_4191,region_4248,region_456,region_5277,region_5939,region_6110,region_6163,region_6430,region_6519,region_7300,region_7303,region_7364,region_7409,region_7641,region_8211,region_8532,region_8755,region_8778,region_9023,region_9108,region_9222,region_9431,region_958	Agap2,Agtr1a,Cd74,Dab2ip,F2r,Gnai2,Grm4,Hgf,Il1b,Lrrk2,Map3k20,Mdfic,Met,Nckap1l,P2rx7,Pdgfb,Prkag2,Ptprc,Slc11a1,Tgfa,Tgfb2,Tgfbr2,Tlr4,Tnf,Tnik,Tom1l1,Trf
GO Biological Process	GO:0006897	endocytosis	322	2.21734e-12	2.85105e-08	8.85421e-11	3.50557	12.8367	45	0.00131605	0.00461349	268	7.62115e-05	0.979927	0.00365644	1.83695	23.9527	44	418	0.0358891	0.105263	region_1075,region_1294,region_1679,region_1852,region_203,region_212,region_224,region_2712,region_2733,region_279,region_2941,region_3049,region_3167,region_3266,region_3393,region_3644,region_4178,region_4299,region_488,region_5089,region_5177,region_5430,region_5777,region_5914,region_5961,region_5990,region_6110,region_6162,region_6201,region_6437,region_652,region_6853,region_6978,region_71…	Ackr3,Aif1,App,Arhgap25,Arr3,Cacng2,Cd14,Cd300a,Cd302,Cd9,Cltb,Cxcl16,Ehd2,Fcer1g,Fnbp1l,Ghr,Grk3,Hck,Hhipl1,Ldlr,Lgals3bp,Loxl3,Lrp5,Lrrk2,Megf10,Mertk,Myo1e,Myo1g,Ncf2,Ncf4,Ophn1,P2rx7,Pear1,Pik3cg,Rab20,Ramp1,Ramp2,Shh,Slc11a1,Snca,Snx7,Syt2,Tgfbr2,Tyro3
GO Biological Process	GO:0050729	positive regulation of inflammatory response	323	2.30619e-12	2.9653e-08	9.1805e-11	8.81053	2.15651	19	0.00022109	0.00194792	234	3.84805e-05	0.494783	0.00211446	3.02723	5.61571	17	98	0.0138662	0.173469	region_1216,region_1859,region_1889,region_1907,region_212,region_2687,region_3097,region_3835,region_4178,region_4191,region_457,region_5074,region_5089,region_5430,region_6430,region_6668,region_7171,region_721,region_9416	Adora3,Alox5ap,Ccl3,Fcer1g,Ffar3,Il1b,Ldlr,Lta,Pik3cg,Snca,Stat5a,Tlr2,Tlr4,Tlr6,Tlr9,Tnf,Tnfrsf11a
GO Biological Process	GO:0050777	negative regulation of immune response	324	2.47857e-12	3.18694e-08	9.83624e-11	7.16005	3.0726	22	0.00031501	0.00225549	237	4.33829e-05	0.557817	0.00235366	2.63649	7.96513	21	139	0.0171289	0.151079	region_1259,region_1922,region_2733,region_2948,region_310,region_3393,region_3769,region_4191,region_4641,region_4795,region_5088,region_5269,region_581,region_5820,region_5914,region_5939,region_6100,region_7737,region_9023,region_9129,region_9157,region_9318	A2m,Cd300a,Cd55,H2-T23,Hlx,Il12b,Il4ra,Klrb1b,Lgals9,Loxl3,Nlrc5,Nlrx1,Psmb4,Ptprc,Serping1,Slamf8,Susd4,Tgfb2,Tnf,Tyro3,Vsir
GO Biological Process	GO:0002221	pattern recognition receptor signaling pathway	325	2.56075e-12	3.29262e-08	1.01311e-10	11.4891	1.39262	16	0.000142774	0.00164035	241	4.82035e-05	0.619801	0.00257179	3.60101	3.6101	13	63	0.0106036	0.206349	region_1216,region_1859,region_1889,region_203,region_2116,region_3386,region_3936,region_4086,region_4169,region_6430,region_6564,region_721,region_8522,region_8713,region_8762,region_9549	Cd14,Cd86,Irgm2,Ly96,Pik3ap1,Rftn1,Ticam2,Tlr2,Tlr4,Tlr6,Tlr9,Trim12c,Unc93b1
GO Biological Process	GO:0032655	regulation of interleukin-12 production	326	2.72336e-12	3.50169e-08	1.07414e-10	12.8034	1.17157	15	0.000120112	0.00153783	329	0.000172118	1	0.00672674	3.62192	3.03707	11	53	0.00897227	0.207547	region_1216,region_1374,region_1818,region_1859,region_1889,region_2116,region_375,region_3936,region_5067,region_5590,region_5820,region_6430,region_721,region_8583,region_9421	H2-M3,Il12b,Isl1,Nfkb1,Tlr2,Tlr4,Tlr6,Tlr9,Tnfrsf9,Tnfsf9,Unc93b1
GO Biological Process	GO:0061024	membrane organization	327	2.83031e-12	3.63921e-08	1.11291e-10	3.13492	16.5874	52	0.00170057	0.00533115	3864	0.297404	1	0.989652	1.08636	43.2638	47	755	0.0383361	0.0622517	region_1069,region_1075,region_1294,region_138,region_1391,region_1505,region_1508,region_17,region_198,region_269,region_2743,region_2808,region_3049,region_3167,region_3271,region_3327,region_3414,region_37,region_4178,region_4191,region_4244,region_4332,region_4404,region_4418,region_456,region_5232,region_5406,region_5430,region_5949,region_5961,region_6425,region_6466,region_652,region_6936,…	Abcb4,Aif1,Arhgap25,Arhgap44,Atp8b5,Bcl2a1a,Bcl2a1b,Bcl2a1d,Cacna1a,Cd9,Cmtm8,Cnp,Crb1,Cstad,Dmpk,Dysf,Ehd2,F11r,Fat4,Fcer1g,Flna,Gm29094,Golga4,Gpr179,Lmna,Lrrc4,Macf1,Marveld1,Megf10,Ncf1,Nkd2,Nsg1,P2rx7,Rab20,Rab32,Ramp1,Ramp2,Reep1,Rftn1,Sh3pxd2b,Snca,Stx11,Syt12,Syt2,Tnf,Tnik,Wnt4
GO Biological Process	GO:0018193	peptidyl-amino acid modification	328	2.9747e-12	3.82486e-08	1.16612e-10	3.09029	17.1505	53	0.0017583	0.00543367	2676	0.147504	1	0.708747	1.16043	44.811	52	782	0.0424144	0.0664962	region_1073,region_1135,region_145,region_1577,region_1685,region_1932,region_2057,region_214,region_2324,region_2361,region_2547,region_2651,region_2716,region_2733,region_2752,region_279,region_2861,region_3097,region_3265,region_3271,region_3393,region_3463,region_3523,region_3554,region_3806,region_3893,region_4031,region_4060,region_407,region_415,region_4285,region_4720,region_5249,region_5…	Agtr1a,Asphd2,Camk1,Dclk2,Dmpk,Egln3,Epha10,Epha2,Epha3,Epha4,Epha5,Ephb1,Erbb2,F2r,Fes,Fgfr3,Fut8,Galnt13,Grap,Hck,Insrr,Irf4,Kdr,Loxl3,Lrrk2,Lyn,Mast4,Mertk,Met,Msl3l2,Ndnf,Ntrk1,Ntrk2,Osm,P3h2,Pdgfb,Pdgfra,Pdia2,Prdm5,Prkcb,Qpct,Ret,Rps6ka4,Sgk3,Spi1,Stat5a,Tgfbr2,Tmx3,Trpm4,Ttn,Tyro3,Vrk2
GO Biological Process	GO:0032870	cellular response to hormone stimulus	329	3.28497e-12	4.22382e-08	1.28384e-10	3.88058	10.05	39	0.00103035	0.00399836	2211	0.0979796	1	0.569797	1.26568	26.0729	33	455	0.0269168	0.0725275	region_1075,region_1314,region_133,region_1374,region_1614,region_1637,region_1793,region_2195,region_2242,region_287,region_293,region_306,region_3097,region_3265,region_3266,region_329,region_3469,region_3611,region_373,region_375,region_3826,region_4677,region_4812,region_507,region_5115,region_5585,region_6089,region_6141,region_6978,region_7300,region_8187,region_823,region_8251,region_8476,…	Abcb4,Agtr1a,Aif1,Bglap2,Ccl2,Cyba,Eif4ebp1,Epha3,Epha5,Gata4,Ghr,Gjb2,Gm21973,Hcrtr1,Icam1,Igfbp2,Inhbb,Isl1,Lhb,Mef2c,Nfkb1,Nkx6-1,Nr2e1,Nr2f1,Nr4a2,P2ry6,Pde3b,Ramp2,Ren1,Stat5a,Tbc1d4,Thrb,Wnt1
GO Biological Process	GO:0051092	positive regulation of NF-kappaB transcription factor activity	330	3.37778e-12	4.34315e-08	1.31611e-10	8.00681	2.49787	20	0.000256087	0.00205044	469	0.000710379	1	0.0194756	2.47095	6.47525	16	113	0.0130506	0.141593	region_1216,region_1314,region_1614,region_1685,region_1859,region_1889,region_2048,region_2190,region_2687,region_373,region_4191,region_488,region_506,region_6430,region_655,region_717,region_721,region_7981,region_9034,region_9416	App,Eda,Icam1,Il1b,Il1rap,Lrrfip1,Nod1,Ntrk1,Prkcb,Tlr2,Tlr4,Tlr6,Tlr9,Tnf,Tnfrsf11a,Trim62
GO Biological Process	GO:1902532	negative regulation of intracellular signal transduction	331	3.69594e-12	4.75224e-08	1.43572e-10	3.70999	11.0512	41	0.00113299	0.0042034	1628	0.0515782	1	0.407367	1.31576	28.8808	38	504	0.0309951	0.0753968	region_1180,region_1198,region_1259,region_1294,region_1464,region_1576,region_2188,region_2231,region_2467,region_2687,region_269,region_2783,region_2916,region_3112,region_3167,region_3778,region_379,region_3817,region_4031,region_4404,region_4545,region_5277,region_5857,region_5914,region_5939,region_5972,region_6430,region_6519,region_6898,region_7166,region_7220,region_7303,region_7342,regio…	Ackr3,Arhgap25,Arhgap44,Casp8,Cd300a,Cd74,Creb3l1,Cxcl12,Dab2ip,Dusp16,Dusp2,Epha2,F2rl1,Il1b,Lrrc15,Lrrc4,Lrrk2,Lyn,Mapk8ip1,Met,Ndrg2,Nlrx1,P2rx7,Plaur,Ptprj,Ptprr,Rasal1,Rassf2,Ripor2,Slc9a3r2,Spred2,Sri,Stmn3,Tank,Tgfb2,Timp3,Tlr4,Wtip
GO Biological Process	GO:0002758	innate immune response-activating signal transduction	332	4.05115e-12	5.20897e-08	1.56897e-10	11.1356	1.43683	16	0.000147307	0.00164035	261	6.79695e-05	0.873952	0.00334848	3.49021	3.7247	13	65	0.0106036	0.2	region_1216,region_1859,region_1889,region_203,region_2116,region_3386,region_3936,region_4086,region_4169,region_6430,region_6564,region_721,region_8522,region_8713,region_8762,region_9549	Cd14,Cd86,Irgm2,Ly96,Pik3ap1,Rftn1,Ticam2,Tlr2,Tlr4,Tlr6,Tlr9,Trim12c,Unc93b1
GO Biological Process	GO:0002224	toll-like receptor signaling pathway	333	4.18424e-12	5.38009e-08	1.61564e-10	14.0742	0.994728	14	0.000101982	0.00143531	227	3.49312e-05	0.449145	0.00197861	4.26581	2.57864	11	45	0.00897227	0.244444	region_1216,region_1859,region_1889,region_203,region_2116,region_3936,region_4086,region_4169,region_6430,region_6564,region_721,region_8522,region_8762,region_9549	Cd14,Cd86,Ly96,Pik3ap1,Rftn1,Ticam2,Tlr2,Tlr4,Tlr6,Tlr9,Unc93b1
GO Biological Process	GO:0010769	regulation of cell morphogenesis involved in differentiation	334	4.1867e-12	5.38325e-08	1.61175e-10	5.06564	5.72484	29	0.000586923	0.00297314	1049	0.0141194	1	0.173067	1.61709	14.8415	24	259	0.0195759	0.0926641	region_1209,region_1467,region_158,region_1607,region_17,region_2057,region_2217,region_2242,region_269,region_286,region_293,region_3122,region_3137,region_329,region_3327,region_37,region_3870,region_4199,region_4418,region_456,region_5099,region_5735,region_6812,region_7274,region_7303,region_7450,region_8422,region_9330,region_958	Arhgap44,Cacna1a,Chrnb2,Disc1,Epha4,Flna,Fstl4,Golga4,Grin1,Lims1,Lrrk2,Mgll,Nfatc4,Nkx6-1,Nr2e1,Nrp1,Ntrk2,Plxna4,Ret,Rgma,Sema5a,Tnik,Ust,Wnt7a
GO Biological Process	GO:0072001	renal system development	335	4.1892e-12	5.38648e-08	1.6079e-10	3.69469	11.097	41	0.00113769	0.0042034	147	3.28582e-06	0.0422491	0.000287409	2.2253	17.0763	38	298	0.0309951	0.127517	region_1101,region_1147,region_1262,region_1375,region_1397,region_150,region_158,region_2361,region_2397,region_2522,region_2609,region_2823,region_2858,region_3342,region_3611,region_3640,region_3826,region_4872,region_4936,region_5115,region_5177,region_5735,region_5939,region_6054,region_6079,region_6159,region_6190,region_6769,region_6812,region_7300,region_7303,region_762,region_782,region_…	Adamts1,Agtr1a,Aldh1a2,Ampd2,Basp1,Bmp6,Dact2,Emx2,Epha4,Fat4,Foxd1,Hoxd11,Irx3,Itga8,Kcnj8,Kif26b,Lgr5,Lrrk2,Mef2c,Myc,Myo1e,Nfia,Npnt,Nrp1,Ovol1,Pdgfb,Pdgfra,Prox1,Ptpro,Ren1,Ret,Shh,Six4,Sulf2,Tgfb2,Tshz3,Wnt1,Wnt4
GO Biological Process	GO:0010038	response to metal ion	336	4.25932e-12	5.47663e-08	1.62995e-10	3.76705	10.6184	40	0.00108862	0.00410088	368	0.000319084	1	0.0111489	1.87765	18.1078	34	316	0.0277325	0.107595	region_1279,region_1294,region_1306,region_1314,region_1614,region_1859,region_203,region_2195,region_225,region_2537,region_2824,region_3554,region_3611,region_373,region_3835,region_4072,region_4367,region_488,region_5099,region_5177,region_5275,region_5346,region_5392,region_5430,region_5528,region_5665,region_5771,region_6864,region_7165,region_7171,region_7303,region_7364,region_7687,region_…	Abcb4,Adamts13,Alox5ap,App,Aqp9,Bmp6,C1qa,Cd14,Cd86,Cldn1,Cpne2,Cyp2r1,Glra1,Hvcn1,Icam1,Igfbp2,Il1a,Itpkb,Itpr3,Kcnmb4,Lrrk2,Mef2c,Ncf1,Nfatc4,P2rx7,Shh,Slc25a13,Slc30a3,Slc6a1,Snca,Tlr9,Trf,Trpm2,Ttn
GO Biological Process	GO:0045666	positive regulation of neuron differentiation	337	4.30391e-12	5.53397e-08	1.64213e-10	4.45541	7.40672	33	0.000759352	0.00338323	697	0.00345269	1	0.063694	1.66201	19.2538	32	336	0.0261011	0.0952381	region_158,region_1685,region_17,region_1870,region_192,region_2048,region_2057,region_2188,region_2242,region_286,region_3265,region_3611,region_3806,region_3893,region_4031,region_420,region_528,region_549,region_5534,region_5720,region_5735,region_6054,region_6598,region_6633,region_6812,region_7450,region_7641,region_7803,region_8337,region_8422,region_8778,region_8836,region_9190	Bmp6,Camk1,Dab2ip,Disc1,Dlx2,Epha3,Epha4,Fes,Fez1,Fezf1,Gdf7,Golga4,Hgf,Il1rap,Irx3,Lyn,Mef2c,Ndnf,Neurog2,Nkx6-1,Nrp1,Ntrk1,Ntrk2,Prox1,Rasal1,Ret,Rgma,Sema5a,Syt2,Tgif1,Tgif2,Zfp804a
GO Biological Process	GO:0007517	muscle organ development	338	4.75013e-12	6.10772e-08	1.80702e-10	4.56948	7.00298	32	0.00071796	0.00328071	639	0.00260901	1	0.0524986	1.76401	15.873	28	277	0.0228385	0.101083	region_1043,region_1069,region_1130,region_1375,region_1765,region_2239,region_236,region_3112,region_3151,region_3342,region_3469,region_3554,region_3611,region_4677,region_4936,region_5269,region_5879,region_5939,region_6100,region_6190,region_6208,region_6294,region_6484,region_6519,region_6982,region_7511,region_7656,region_809,region_8337,region_8532,region_9256,region_9421	Cntfr,Dner,Eln,Foxl2,Fzd1,Fzd2,Gata4,Hist1h1b,Hlx,Hoxd10,Hoxd9,Isl1,Lmna,Mef2c,Megf10,Met,Myc,Myl3,Pax5,Prox1,Ripor2,S1pr1,Six4,Srpk3,Tcf15,Tgfb2,Ttn,Zbtb42
GO Biological Process	GO:0001101	response to acid chemical	339	4.96906e-12	6.38922e-08	1.88472e-10	4.56134	7.01548	32	0.000719241	0.00328071	915	0.00931213	1	0.130858	1.59145	18.2224	29	318	0.0236542	0.091195	region_1101,region_1314,region_1614,region_1685,region_2057,region_212,region_2138,region_2195,region_2361,region_306,region_3137,region_3265,region_3469,region_370,region_373,region_4031,region_4072,region_4191,region_4677,region_507,region_5074,region_5099,region_51,region_6812,region_7815,region_8251,region_8476,region_8537,region_8824,region_9035,region_9190,region_9222	Abcb4,Aldh1a2,Bmp6,Ccl2,Cd9,Cldn1,Cyba,Epha3,Ffar3,Gata4,Gjb2,Gldc,Glra1,Grin1,Icam1,Igfbp2,Krt8,Lamtor5,Ldlr,Lyn,Nfatc4,Ntrk1,Ntrk2,P2ry6,Pdgfb,Pdgfra,Ret,Tnf,Yap1
GO Biological Process	GO:0030111	regulation of Wnt signaling pathway	340	5.21506e-12	6.70552e-08	1.97221e-10	3.99257	9.26722	37	0.000950095	0.00379332	149	3.65679e-06	0.047019	0.000315564	2.33597	14.555	34	254	0.0277325	0.133858	region_1035,region_1135,region_1141,region_1147,region_1216,region_1374,region_1571,region_1985,region_214,region_2190,region_2522,region_375,region_4199,region_4698,region_5099,region_5115,region_5177,region_5232,region_538,region_5852,region_6853,region_7055,region_721,region_7272,region_7303,region_773,region_7815,region_8243,region_8422,region_8750,region_8778,region_9099,region_9234,region_9…	Ctnnd2,Dab2ip,Dcdc2a,Disc1,Eda,Fgfr3,Hhex,Isl1,Lgr5,Lrp5,Lrrk1,Lrrk2,Macf1,Mdfic,Mesp1,Nfatc4,Nfkb1,Nkd2,Pfdn5,Plpp3,Ptpro,Rnf213,Sfrp4,Shh,Six3,Sostdc1,Sulf2,Tlr2,Trpm4,Tsku,Wnt1,Wnt4,Wnt7a,Yap1
GO Biological Process	GO:0042391	regulation of membrane potential	341	5.47703e-12	7.04236e-08	2.06521e-10	4.0811	8.82115	36	0.000904362	0.00369079	1230	0.0230283	1	0.24073	1.43971	22.9212	33	400	0.0269168	0.0825	region_1294,region_1467,region_1615,region_1653,region_214,region_2315,region_3137,region_3191,region_3271,region_3296,region_3327,region_3611,region_37,region_4003,region_4072,region_4199,region_4277,region_4418,region_488,region_4890,region_5074,region_5430,region_5864,region_6079,region_6519,region_6663,region_6697,region_6838,region_6860,region_7171,region_7303,region_7687,region_8532,region_…	Adora2a,Ano1,App,Cacna1a,Cacng2,Catsper4,Chrnb2,Dmpk,Ffar3,Fhl1,Flna,Glra1,Grin1,Kcnh3,Kcnj8,Kcnk13,Kcnk15,Kcnk18,Kcnmb4,Kcnn2,Kdr,Lrrk2,Mef2c,Met,P2rx5,P2rx7,Ptpn3,Scn4b,Slc29a1,Snca,Trpm4,Wnt7a,Xirp1
GO Biological Process	GO:0021952	central nervous system projection neuron axonogenesis	342	5.53586e-12	7.118e-08	2.08129e-10	18.7194	0.641047	12	6.57214e-05	0.00123026	142	2.70505e-06	0.0347815	0.00024494	6.01761	1.66179	10	29	0.00815661	0.344828	region_1209,region_1467,region_1571,region_1607,region_1901,region_293,region_329,region_415,region_466,region_5735,region_7065,region_8187	Chrnb2,Dcc,Epha4,Ephb1,Nfib,Nr2e1,Nr4a2,Pam,Plxna4,Tsku
GO Biological Process	GO:0048568	embryonic organ development	343	5.64686e-12	7.26073e-08	2.11683e-10	3.20292	15.2986	49	0.00156844	0.00502358	464	0.000680604	1	0.0188604	1.64161	28.0212	46	489	0.0375204	0.0940695	region_1035,region_1101,region_1375,region_1870,region_2138,region_236,region_2361,region_2858,region_3108,region_3112,region_3151,region_3159,region_3342,region_3469,region_3611,region_3634,region_4156,region_4191,region_4677,region_4936,region_5115,region_5177,region_5269,region_5488,region_5852,region_5939,region_5964,region_6100,region_6110,region_6190,region_6208,region_6294,region_6625,regi…	Aldh1a2,Alx3,Chst11,Dlx2,En2,Epha2,Foxe1,Foxl2,Fzd2,Gata4,Hhex,Hlx,Hoxa5,Hoxd10,Hoxd11,Hoxd9,Hpn,Itga8,Kdr,Krt8,Lrig3,Mef2c,Mesp1,Myc,Nes,Otx1,Pax5,Pax6,Pdgfb,Pdgfra,Plcd1,Prox1,Ripor2,Shh,Six3,Six4,Sobp,Spint1,Tal1,Tex19.1,Tgfb2,Tgfbr2,Tifab,Tnf,Wnt1,Yap1
GO Biological Process	GO:0003158	endothelium development	344	6.68791e-12	8.59932e-08	2.4998e-10	8.94991	2.01119	18	0.000206192	0.0018454	334	0.000195173	1	0.00751358	2.87655	5.21458	15	91	0.0122349	0.164835	region_1035,region_1314,region_1614,region_3116,region_34,region_373,region_379,region_4199,region_6519,region_6838,region_6952,region_753,region_7990,region_8337,region_8532,region_8824,region_9222,region_9256	Cldn1,Cnmd,F11r,F2rl1,Icam1,Kdr,Mesp1,Met,Msn,Pdgfb,Prox1,Rap2c,Rapgef3,S1pr1,Wnt7a
GO Biological Process	GO:0010952	positive regulation of peptidase activity	345	6.85586e-12	8.81527e-08	2.55515e-10	6.42275	3.58102	23	0.000367134	0.00235801	778	0.0054406	1	0.0899168	1.93901	9.2831	18	162	0.0146819	0.111111	region_1308,region_2547,region_2716,region_3151,region_4031,region_4191,region_488,region_4936,region_5430,region_5735,region_6190,region_655,region_660,region_6812,region_7171,region_7220,region_7431,region_7680,region_7965,region_8199,region_9004,region_9034,region_980	Antxr1,App,Casp8,Egln3,Epha4,F2r,Foxl2,Lyn,Myc,Nlrp1a,Nod1,Pcolce,Perp,Psme1,Ret,Snca,Tank,Tnf
GO Biological Process	GO:0010035	response to inorganic substance	346	7.29635e-12	9.38165e-08	2.71146e-10	3.32494	13.8348	46	0.00141838	0.00471601	969	0.01059	1	0.140522	1.46996	26.5313	39	463	0.0318108	0.0842333	region_1279,region_1294,region_1306,region_1314,region_1614,region_1685,region_1859,region_203,region_2138,region_2195,region_225,region_2537,region_2824,region_3554,region_3611,region_373,region_3835,region_4072,region_4367,region_488,region_5099,region_5177,region_5275,region_5346,region_5392,region_5430,region_5528,region_5665,region_5771,region_6864,region_7165,region_7171,region_7237,region_…	Abcb4,Adamts13,Alox5ap,App,Aqp9,Bmp6,C1qa,Cd14,Cd86,Cd9,Cldn1,Cpne2,Cyp2r1,Eef1a2,Glra1,Hvcn1,Icam1,Igfbp2,Il1a,Itpkb,Itpr3,Kcnmb4,Krt8,Lrrk2,Mef2c,Ncf1,Nfatc4,Nr4a2,Ntrk1,P2rx7,Shh,Slc25a13,Slc30a3,Slc6a1,Snca,Tlr9,Trf,Trpm2,Ttn
GO Biological Process	GO:0061061	muscle structure development	347	8.79986e-12	1.13149e-07	3.26077e-10	3.20722	14.9662	48	0.00153437	0.00492106	525	0.00110239	1	0.0269992	1.62335	27.1044	44	473	0.0358891	0.0930233	region_1035,region_1043,region_1060,region_1069,region_1075,region_1130,region_1375,region_1765,region_2138,region_2239,region_236,region_2361,region_2858,region_3112,region_3151,region_3342,region_3469,region_3554,region_3611,region_4484,region_4677,region_4890,region_4936,region_5099,region_5115,region_5177,region_5269,region_5879,region_5939,region_6100,region_6190,region_6208,region_6294,regi…	Cntfr,Dner,Eln,Foxl2,Fzd1,Fzd2,Gata4,Hist1h1b,Hlx,Hoxd10,Hoxd9,Isl1,Itga8,Krt8,Lmna,Mef2c,Megf10,Mesp1,Met,Mybpc2,Myc,Myl3,Nfatc2,Nfatc4,Npnt,Pax5,Pdgfb,Pdgfra,Prox1,Ramp2,Ripor2,S1pr1,Shh,Six4,Srpk3,Tcf15,Tgfb2,Tmod1,Tshz3,Ttn,Wnt1,Wnt4,Xirp1,Zbtb42
GO Biological Process	GO:0032729	positive regulation of interferon-gamma production	348	8.82875e-12	1.1352e-07	3.26207e-10	10.5578	1.51546	16	0.000155369	0.00164035	168	6.58197e-06	0.0846309	0.000503755	3.79371	3.95391	15	69	0.0122349	0.217391	region_1818,region_1859,region_203,region_2687,region_4191,region_470,region_5067,region_5590,region_5820,region_6018,region_6430,region_6668,region_81,region_8762,region_9108,region_9421	Cd14,Cd1d1,Cd244,Fam49b,H2-M3,Il12b,Il1b,Isl1,Lta,Slc11a1,Ticam2,Tlr4,Tlr9,Tnf,Tnfsf9
GO Biological Process	GO:0002761	regulation of myeloid leukocyte differentiation	349	9.71965e-12	1.24975e-07	3.58095e-10	7.5393	2.65277	20	0.000271967	0.00205044	435	0.000538067	1	0.0159045	2.4518	6.93368	17	121	0.0138662	0.140496	region_1135,region_1345,region_1907,region_2784,region_2916,region_3084,region_3097,region_4031,region_4191,region_4382,region_4650,region_4936,region_5209,region_5277,region_5820,region_6190,region_6625,region_8199,region_8770,region_9107	C1qc,Casp8,Ccl3,Cd74,Evi2b,Fgfr3,Ikzf1,Il12b,Lyn,Myc,Ocstamp,Rassf2,Stat5a,Tal1,Tmem178,Tnf,Tyrobp
GO Biological Process	GO:2001236	regulation of extrinsic apoptotic signaling pathway	350	1.10466e-11	1.42038e-07	4.05822e-10	6.26798	3.66944	23	0.000376199	0.00235801	439	0.000544236	1	0.0159403	2.20766	9.51232	21	166	0.0171289	0.126506	region_1069,region_1314,region_1474,region_158,region_1614,region_2427,region_2467,region_2687,region_2861,region_373,region_4191,region_5560,region_5939,region_6160,region_658,region_6812,region_7575,region_7641,region_7815,region_7838,region_8199,region_8211,region_9023	Acsl5,Agap2,Casp8,Dbh,Faim2,Hgf,Icam1,Il1b,Lmna,Ltbr,Nrp1,Ptprc,Ret,Scg2,Sgk3,Tgfb2,Timp3,Tmbim1,Tmc8,Tnf,Yap1
GO Biological Process	GO:0001655	urogenital system development	351	1.12303e-11	1.44399e-07	4.11394e-10	3.44776	12.4719	43	0.00127864	0.00440845	182	1.06317e-05	0.136703	0.000751114	2.07134	19.3112	40	337	0.0326264	0.118694	region_1101,region_1147,region_1262,region_1375,region_1397,region_150,region_158,region_2361,region_2397,region_2522,region_2609,region_2823,region_2858,region_3097,region_3342,region_3611,region_3640,region_3826,region_4872,region_4936,region_5115,region_5177,region_5735,region_5939,region_6054,region_6079,region_6159,region_6190,region_6208,region_6769,region_6812,region_7300,region_7303,regio…	Adamts1,Agtr1a,Aldh1a2,Ampd2,Basp1,Bmp6,Dact2,Emx2,Epha4,Fat4,Foxd1,Hoxd11,Hoxd13,Irx3,Itga8,Kcnj8,Kif26b,Lgr5,Lrrk2,Mef2c,Myc,Myo1e,Nfia,Npnt,Nrp1,Ovol1,Pdgfb,Pdgfra,Prox1,Ptpro,Ren1,Ret,Shh,Six4,Stat5a,Sulf2,Tgfb2,Tshz3,Wnt1,Wnt4
GO Biological Process	GO:0001654	eye development	352	1.16053e-11	1.49221e-07	4.23922e-10	3.50604	11.9793	42	0.00122815	0.00430593	434	0.000535975	1	0.0158792	1.75899	21.6033	38	377	0.0309951	0.100796	region_1060,region_1101,region_1135,region_1571,region_158,region_192,region_198,region_2057,region_2361,region_279,region_293,region_3151,region_3159,region_329,region_3652,region_3918,region_4102,region_415,region_5177,region_5209,region_528,region_538,region_5585,region_5720,region_5939,region_6110,region_6812,region_6838,region_6853,region_7194,region_7255,region_7342,region_7469,region_773,r…	Aldh1a2,Aqp5,Bfsp1,Bhlhe23,Bmp6,Crb1,Epha2,Ephb1,Fgfr3,Fjx1,Foxl2,Ikzf1,Inhbb,Kdr,Lama1,Lamc3,Lrp5,Maf,Mertk,Nes,Nr2e1,Nrp1,Ntrk2,Pax6,Pdgfb,Pdgfra,Pfdn5,Prox1,Ret,Sh3pxd2b,Shh,Six3,Tgfb2,Tgfbr2,Tgif1,Tgif2,Tmod1,Tsku
GO Biological Process	GO:1900407	regulation of cellular response to oxidative stress	353	1.1958e-11	1.53756e-07	4.3557e-10	10.3402	1.54736	16	0.000158638	0.00164035	442	0.000575785	1	0.0167499	2.99161	4.01122	12	70	0.00978793	0.171429	region_1279,region_1306,region_1577,region_1889,region_2651,region_3469,region_407,region_4191,region_4677,region_5115,region_5879,region_6430,region_6519,region_7303,region_7641,region_8532	Fut8,Fzd1,Gata4,Hgf,Lrrk2,Met,Pdia2,Tlr4,Tlr6,Tnf,Trpm2,Wnt1
GO Biological Process	GO:0055114	oxidation-reduction process	354	1.24735e-11	1.60384e-07	4.53062e-10	2.77711	21.2451	59	0.0021781	0.0060488	5476	0.63361	1	1	0.963556	56.0424	54	978	0.0440457	0.0552147	region_1101,region_1415,region_1577,region_1900,region_2010,region_2234,region_225,region_2269,region_2286,region_2527,region_2547,region_2651,region_2733,region_2752,region_2963,region_3029,region_306,region_3276,region_3321,region_3539,region_3638,region_370,region_3790,region_3835,region_3905,region_4187,region_4285,region_4379,region_4397,region_4491,region_466,region_4720,region_5002,region_…	AA467197,AI854703,Acadl,Aldh1a2,Aldh2,Aldh7a1,Alox5ap,Aoc2,Asphd2,Cbr3,Cox6a2,Cox8b,Crym,Cyba,Cyp2r1,Cyp4v3,Dbh,Dcxr,Decr1,Degs2,Echdc2,Egln3,Fads3,Gldc,Gnmt,Hk1,Hsd11b2,Hsd17b6,Htatip2,Loxl3,Mc4r,Miox,Ncf1,Ncf2,Ndufa1,Nfatc4,P3h2,Pam,Pdia2,Ppp1r3d,Prkag2,Prodh2,Ptgr1,Scd4,Sdr42e1,Sh3pxd2a,Sh3pxd2b,Slc25a13,Snca,Stbd1,Suclg2,Tmx3,Txndc2,Vat1l
GO Biological Process	GO:0002833	positive regulation of response to biotic stimulus	355	1.26986e-11	1.63279e-07	4.59941e-10	12.9253	1.08315	14	0.000111047	0.00143531	276	8.12025e-05	1	0.00378298	3.91758	2.80785	11	49	0.00897227	0.22449	region_1216,region_2365,region_306,region_341,region_379,region_4086,region_4169,region_5820,region_655,region_721,region_748,region_9034,region_9190,region_9318	Bmp6,Cyba,F2rl1,Il12b,Lgals9,Ly86,Ly96,Nod1,Sash1,Tlr2,Zc3hav1
GO Biological Process	GO:0050730	regulation of peptidyl-tyrosine phosphorylation	356	1.27426e-11	1.63844e-07	4.60237e-10	5.19761	5.19469	27	0.00053257	0.00276809	745	0.00445301	1	0.0768548	1.78224	13.4662	24	235	0.0195759	0.102128	region_1135,region_1314,region_1433,region_158,region_1614,region_181,region_1985,region_3266,region_330,region_34,region_3523,region_373,region_4031,region_443,region_4698,region_477,region_488,region_5277,region_5735,region_5820,region_5914,region_6417,region_7641,region_8717,region_9023,region_9222,region_9421	App,Ccl5,Cd300a,Cd74,Epha4,Erbb3,Fgfr3,Ghr,Gprc5a,Hgf,Icam1,Il12b,Isl1,Lrrk1,Lyn,Ncf1,Nrp1,Osm,Parp9,Pdgfb,Plpp3,Ptprc,Rap2c,Tgfa
GO Biological Process	GO:2001234	negative regulation of apoptotic signaling pathway	357	1.35611e-11	1.74369e-07	4.88429e-10	5.39598	4.8184	26	0.000493993	0.00266557	855	0.00758827	1	0.114117	1.75307	12.5494	22	219	0.0179445	0.100457	region_1069,region_1314,region_1474,region_158,region_1614,region_2231,region_2687,region_2861,region_3469,region_373,region_3778,region_3817,region_4191,region_4677,region_5277,region_5972,region_658,region_7303,region_7641,region_7815,region_7838,region_8187,region_8211,region_8704,region_9528,region_9751	Ackr3,Agap2,Cd74,Creb3l1,Cxcl12,Faim2,Gata4,Hgf,Icam1,Il1b,Lmna,Lrrk2,Mapk8ip1,Nr4a2,Nrp1,Plaur,Scg2,Sgk3,Tmbim1,Tnf,Wnt4,Yap1
GO Biological Process	GO:0007159	leukocyte cell-cell adhesion	358	1.4118e-11	1.8153e-07	5.07066e-10	3.76897	10.0823	38	0.00103366	0.00389584	208	1.9699e-05	0.25329	0.00121774	2.10818	17.0763	36	298	0.0293638	0.120805	region_102,region_1278,region_1294,region_1314,region_1391,region_1614,region_1818,region_217,region_2231,region_2537,region_2687,region_2910,region_3097,region_310,region_3193,region_373,region_379,region_4178,region_4191,region_4244,region_4335,region_4504,region_5115,region_5177,region_5209,region_521,region_5277,region_5564,region_5820,region_6018,region_6219,region_6296,region_6417,region_69…	Add2,Apbb1ip,Bcl2a1d,Ccl5,Cd151,Cd1d1,Cd74,Cd86,Cxcl12,Dock8,Elf4,F2rl1,Fcer1g,Fermt3,Fut7,Fzd8,Gm13277,Gm13278,H2-M3,H2-T23,Icam1,Ikzf1,Il12b,Il1b,Irf4,Itpkb,Msn,P2rx7,Ptprc,Shh,Slc11a1,Stat5a,Stx11,Tnf,Wnt1,Wnt4
GO Biological Process	GO:0030316	osteoclast differentiation	359	1.41931e-11	1.82495e-07	5.08342e-10	14.7025	0.884203	13	9.06503e-05	0.00133279	258	6.4269e-05	0.826371	0.00320299	4.36276	2.29212	10	40	0.00815661	0.25	region_210,region_2268,region_313,region_4191,region_4379,region_4382,region_4698,region_4765,region_6309,region_7342,region_7364,region_8770,region_9416	Efna2,Epha2,Fam20c,Lrrk1,Nfatc1,Ocstamp,Sh3pxd2a,Tnf,Tnfrsf11a,Trf
GO Biological Process	GO:0019932	second-messenger-mediated signaling	360	1.45417e-11	1.86978e-07	5.19382e-10	6.91351	3.03753	21	0.000311414	0.00215296	504	0.000919561	1	0.0234598	2.27623	7.90783	18	138	0.0146819	0.130435	region_1279,region_1306,region_1907,region_210,region_214,region_313,region_3137,region_3271,region_3386,region_3806,region_5099,region_5392,region_6309,region_6838,region_6864,region_7300,region_7303,region_739,region_8012,region_823,region_8543	Agtr1a,Ccl3,Dmpk,Epha5,Gal,Grin1,Hrc,Irgm2,Itpr3,Kdr,Lat2,Lrrk2,Ndnf,Nfatc1,Nfatc2,Nfatc4,Trpm2,Trpm4
GO Biological Process	GO:2000401	regulation of lymphocyte migration	361	1.65077e-11	2.12256e-07	5.87967e-10	12.6668	1.10525	14	0.000113313	0.00143531	107	5.12498e-07	0.0065897	6.1586e-05	4.8863	2.86516	14	50	0.0114193	0.28	region_1278,region_1907,region_2231,region_2603,region_3112,region_4773,region_488,region_5227,region_6417,region_6916,region_6952,region_6978,region_8476,region_9318	Aif1,App,Ccl12,Ccl2,Ccl3,Ccl4,Ccl5,Cxcl10,Cxcl12,Dock8,Lgals9,Lrch1,Msn,Ripor2
GO Biological Process	GO:0050870	positive regulation of T cell activation	362	1.7018e-11	2.18817e-07	6.04468e-10	4.34303	7.36813	32	0.000755396	0.00328071	76	9.32736e-08	0.00119931	1.57804e-05	3.01239	9.62692	29	168	0.0236542	0.172619	region_1278,region_1285,region_1818,region_2090,region_2195,region_2537,region_2687,region_3097,region_310,region_4235,region_470,region_5067,region_5177,region_5209,region_5269,region_5277,region_5590,region_5820,region_6018,region_6100,region_6110,region_6417,region_6978,region_7409,region_790,region_81,region_8476,region_8522,region_9023,region_9157,region_9318,region_9499	Aif1,Ccl2,Ccl5,Cd1d1,Cd244,Cd74,Cd83,Cd86,Dock8,Fam49b,H2-M3,H2-T23,Hlx,Igfbp2,Ikzf1,Il12b,Il1b,Il1rl2,Il4ra,Itpkb,Lgals9,Nck2,Nckap1l,Ptprc,Shh,Stat5a,Tgfbr2,Tnfsf13b,Tnfsf9
GO Biological Process	GO:0009611	response to wounding	363	2.05036e-11	2.63635e-07	7.26268e-10	3.17253	14.8147	47	0.00151883	0.00481854	158	4.92172e-06	0.0632834	0.000400528	2.03445	22.119	45	386	0.0367047	0.11658	region_1073,region_1088,region_1135,region_1147,region_1512,region_158,region_1608,region_1685,region_181,region_2308,region_2361,region_2716,region_279,region_2824,region_32,region_3393,region_3469,region_37,region_379,region_3806,region_4031,region_4199,region_4265,region_4545,region_4677,region_5088,region_5089,region_5115,region_5177,region_521,region_5232,region_5240,region_5625,region_5852,…	Adamts13,Aif1,Arhgef19,Ccl2,Cpq,Cxcl2,Dysf,Erbb2,F2r,F2rl1,Fermt3,Fgfr3,Flna,Gata4,Hhex,Hps4,Il1a,Isl1,Jam3,Lnpk,Lyn,Macf1,Mcam,Mertk,Ndnf,Nrp1,Ntrk1,P2ry12,Pax6,Pdgfb,Pdgfra,Pik3cd,Pik3cg,Plek,Ptprj,Serping1,Shh,Slc11a1,Sulf2,Tgfa,Tgfb2,Tgfbr2,Tyro3,Wnt1,Wnt7a
GO Biological Process	GO:0002688	regulation of leukocyte chemotaxis	364	2.59095e-11	3.33145e-07	9.15232e-10	7.62991	2.4902	19	0.0002553	0.00194792	212	2.17559e-05	0.279737	0.00131952	2.93425	6.47525	19	113	0.0154976	0.168142	region_1088,region_1325,region_1907,region_2231,region_2280,region_2603,region_3112,region_379,region_4031,region_4545,region_4641,region_4773,region_5277,region_6417,region_6916,region_6978,region_7409,region_7707,region_8476	Aif1,C3ar1,Ccl12,Ccl2,Ccl3,Ccl4,Ccl5,Cd74,Cxcl10,Cxcl12,Cxcl2,F2rl1,Jam3,Lyn,Mtus1,Nckap1l,Ptprj,Ripor2,Slamf8
GO Biological Process	GO:0032642	regulation of chemokine production	365	2.67863e-11	3.44418e-07	9.43612e-10	9.7813	1.63577	16	0.000167703	0.00164035	199	1.6177e-05	0.208004	0.00104525	3.53738	4.24043	15	74	0.0122349	0.202703	region_1216,region_1859,region_2687,region_2824,region_379,region_4191,region_5074,region_5277,region_6417,region_6430,region_721,region_7342,region_8762,region_9157,region_9193,region_9318	Ccl5,Cd74,Epha2,F2rl1,Ffar3,Il1a,Il1b,Il4ra,Lgals9,Sigirr,Ticam2,Tlr2,Tlr4,Tlr9,Tnf
GO Biological Process	GO:0052547	regulation of peptidase activity	366	3.14943e-11	4.04954e-07	1.10643e-09	3.74232	9.88691	37	0.00101363	0.00379332	2544	0.119998	1	0.606499	1.24373	25.7291	32	449	0.0261011	0.0712695	region_1308,region_157,region_2467,region_2547,region_2716,region_3151,region_3296,region_3329,region_4031,region_4191,region_4244,region_4691,region_488,region_4936,region_5088,region_51,region_5430,region_5735,region_594,region_5964,region_6190,region_655,region_660,region_6812,region_7171,region_7220,region_7431,region_7537,region_7641,region_7680,region_7965,region_8199,region_8704,region_900…	A2m,Adora2a,Antxr1,App,Bcl2a1d,Birc3,Casp8,Ctla2b,Egln3,Epha4,F2r,Foxl2,Hgf,Lamtor5,Lyn,Myc,Nlrp1a,Nod1,Pcolce,Perp,Plaur,Psmb8,Psme1,Ret,Serpinb1a,Serping1,Snca,Spint1,Tank,Timp3,Tnf,Tnfaip8
GO Biological Process	GO:0032732	positive regulation of interleukin-1 production	367	3.37346e-11	4.33759e-07	1.1819e-09	15.9665	0.751572	12	7.70527e-05	0.00123026	190	1.3616e-05	0.175075	0.000921446	5.13267	1.94831	10	34	0.00815661	0.294118	region_1216,region_1294,region_1900,region_1907,region_5582,region_6430,region_655,region_721,region_9004,region_9034,region_9318,region_9421	Casp4,Ccl3,Hk1,Isl1,Lgals9,Nlrp1a,Nod1,P2rx7,Tlr2,Tlr4
GO Biological Process	GO:0006461	protein complex assembly	368	3.4197e-11	4.39705e-07	1.19485e-09	2.78996	20.072	56	0.00205782	0.00574123	4613	0.417671	1	1	1.03442	52.2031	54	911	0.0440457	0.0592755	region_11,region_1130,region_1141,region_1190,region_1294,region_1467,region_148,region_1764,region_2234,region_2527,region_277,region_306,region_3112,region_3137,region_3178,region_3276,region_3554,region_3572,region_3735,region_3835,region_3911,region_4057,region_4072,region_4178,region_4335,region_4379,region_4484,region_4716,region_4754,region_488,region_4932,region_5209,region_521,region_527…	Add2,Ahnak,Aif1,Alox5ap,App,C1qtnf5,Cand2,Ccl5,Cd74,Chrnb2,Cldn1,Col6a2,Cyba,Dcxr,Decr1,Dgkh,Diaph2,Dlgap3,Dlgap4,Fcer1g,Fermt3,Glra1,Gnmt,Grin1,Hist1h3d,Hist1h3i,Hist1h4k,Hist1h4n,Hist2h3b,Ikzf1,Ikzf4,Kctd8,Lrrc6,Lrrk2,Mybpc2,Ncf1,Nckap1l,Ndufa1,Nsg1,P2rx7,Panx2,Ripor2,Rnf213,Sh3pxd2a,Sh3pxd2b,Slc6a1,Tnfrsf9,Tradd,Trim21,Trpm8,Ttn,Upk1a,Yap1,Zmynd10
GO Biological Process	GO:0030534	adult behavior	369	3.44372e-11	4.42793e-07	1.19998e-09	5.38547	4.64212	25	0.00047592	0.00256305	480	0.000746137	1	0.0199871	2.15572	9.74153	21	170	0.0171289	0.123529	region_1060,region_1072,region_138,region_1467,region_188,region_231,region_2743,region_3137,region_3327,region_3342,region_4072,region_4418,region_4628,region_488,region_5430,region_5560,region_5735,region_6108,region_6208,region_6294,region_6519,region_7171,region_8187,region_8532,region_9445	Adam22,App,Cacna1a,Chrnb2,Cnp,Dbh,Dmrt3,Epha4,Glra1,Grin1,Grm7,Hoxd10,Hoxd9,Klhl1,Met,Nr4a2,Pax5,Rnf180,Snca,Tmod1,Unc79
GO Biological Process	GO:0071347	cellular response to interleukin-1	370	3.47132e-11	4.46343e-07	1.20633e-09	8.76685	1.93912	17	0.000198803	0.00174288	411	0.000458925	1	0.0143573	2.7763	5.04267	14	88	0.0114193	0.159091	region_1314,region_1374,region_1614,region_1907,region_2603,region_2824,region_3463,region_373,region_375,region_6417,region_6916,region_7220,region_7707,region_8476,region_8778,region_9422,region_9499	Adamts7,Ccl12,Ccl2,Ccl3,Ccl4,Ccl5,Cxcl2,Dab2ip,Icam1,Il1a,Il1rl2,Nfkb1,Rps6ka4,Tank
[truncated: 130 more rows]

## Sheet: ReViGO Biological Process
TermID	Name	Value	LogSize	Frequency	Uniqueness	Dispensability	PC_0	PC_1	PC3_0	PC3_1	PC3_2	Representative
[truncated: 464 more rows]

[truncated: 5 more sheets: GO Cellular Component, GO Molecular Function, GO Human Phenotype, GO Mouse Phenotype Single KO, GO Mouse Phenotype]
